# Supplementary material for: Topo II inhibition and DNA intercalation by new phthalazine-based derivatives as potent anticancer agents: design, synthesis, anti-proliferative, docking, and in vivo studies
Source: PubMed Central journal article supplement (PMC8667898; doi:10.1080/14756366.2021.2007905), 2021-12-11
Supplement: IENZ_A_2007905_SM7906.pdf [file IENZ_A_2007905_SM7906.pdf]

7a

## TOPKAT\_Developmental\_Toxicity\_Potential

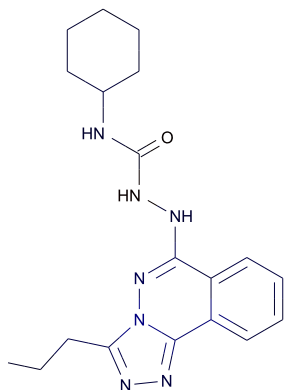C<sub>19</sub>H<sub>25</sub>N<sub>7</sub>O

Molecular Weight: 367.44809

ALogP: 3.681

Rotatable Bonds: 5

Acceptors: 5

Donors: 3

**Model Prediction**

Prediction: Non-Toxic

Probability: 0.384

Enrichment: 0.73

Bayesian Score: -4.99

Mahalanobis Distance: 11.9

Mahalanobis Distance p-value: 3.77e-005

Prediction: Positive if the Bayesian score is above the estimated best cutoff value from minimizing the false positive and false negative rate.

Probability: The estimated probability that the sample is in the positive category. This assumes that the Bayesian score follows a normal distribution and is different from the prediction using a cutoff.

Enrichment: An estimate of enrichment, that is, the increased likelihood (versus random) of this sample being in the category.

Bayesian Score: The standard Laplacian-modified Bayesian score.

Mahalanobis Distance: The Mahalanobis distance (MD) is the distance to the center of the training data. The larger the MD, the less trustworthy the prediction.

Mahalanobis Distance p-value: The p-value gives the fraction of training data with an MD greater than or equal to the one for the given sample, assuming normally distributed data. The smaller the p-value, the less trustworthy the prediction. For highly non-normal X properties (e.g., fingerprints), the MD p-value is wildly inaccurate.

**Structural Similar Compounds**

| Name               | Ochratoxin a                             | Amsacrine                             | Chenodiol                        |
|--------------------|------------------------------------------|---------------------------------------|----------------------------------|
| Structure          |                                          |                                       |                                  |
| Actual Endpoint    | Toxic                                    | Toxic                                 | Toxic                            |
| Predicted Endpoint | Toxic                                    | Toxic                                 | Toxic                            |
| Distance           | 0.552                                    | 0.588                                 | 0.612                            |
| Reference          | Toxicol Appl Pharmacol 37(2):331-8; 1976 | Fundam Appl Toxicol 7(2):214-20; 1986 | Arch Int Pharm 246:149-158; 1980 |

**Model Applicability**

Unknown features are fingerprint features in the query molecule, but not found or appearing too infrequently in the training set.

1. All properties and OPS components are within expected ranges.

**Feature Contribution****Top features for positive contribution**

| Fingerprint | Bit/Smiles | Feature Structure              | Score | Toxic in training set |
|-------------|------------|--------------------------------|-------|-----------------------|
| SCFP_6      | 1256786467 | <br><chem>[*]NC(=O)N[*]</chem> | 0.12  | 9 out of 15           |

|                                               |                   |                                                                                                                                 |              |                              |
|-----------------------------------------------|-------------------|---------------------------------------------------------------------------------------------------------------------------------|--------------|------------------------------|
| SCFP_6                                        | 9                 | 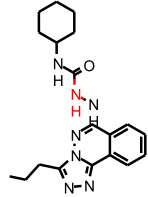<br>[*]N[*]                                  | 0.0928       | 45 out of 78                 |
| SCFP_6                                        | -1272798659       | <br>[*]CCC                                   | 0.0708       | 44 out of 78                 |
| <b>Top Features for negative contribution</b> |                   |                                                                                                                                 |              |                              |
| <b>Fingerprint</b>                            | <b>Bit/Smiles</b> | <b>Feature Structure</b>                                                                                                        | <b>Score</b> | <b>Toxic in training set</b> |
| SCFP_6                                        | -572674910        | <br>[*]:n1:[*]:[*]:n:[c]:<br>1:[c](:[*]):[*] | -0.945       | 0 out of 3                   |
| SCFP_6                                        | 149212520         | <br>[*][c](:[*]):n:n(:[*]<br>):[*]          | -0.448       | 5 out of 16                  |
| SCFP_6                                        | 1424144789        | <br>[*]C[c]1:n:[*]:[*]:n:<br>1:[*]         | -0.438       | 1 out of 4                   |

7b

TOPKAT\_Developmental\_Toxicity\_Potential

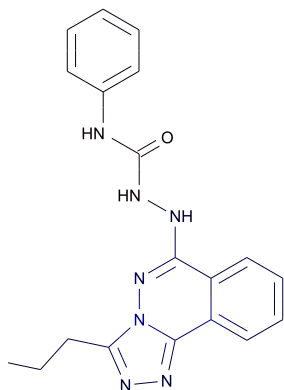C<sub>19</sub>H<sub>19</sub>N<sub>7</sub>O

Molecular Weight: 361.40046

ALogP: 3.399

Rotatable Bonds: 5

Acceptors: 5

Donors: 3

### Model Prediction

Prediction: Non-Toxic

Probability: 0.4

Enrichment: 0.76

Bayesian Score: -4.41

Mahalanobis Distance: 10

Mahalanobis Distance p-value: 0.0194

Prediction: Positive if the Bayesian score is above the estimated best cutoff value from minimizing the false positive and false negative rate.

Probability: The estimated probability that the sample is in the positive category. This assumes that the Bayesian score follows a normal distribution and is different from the prediction using a cutoff.

Enrichment: An estimate of enrichment, that is, the increased likelihood (versus random) of this sample being in the category.

Bayesian Score: The standard Laplacian-modified Bayesian score.

Mahalanobis Distance: The Mahalanobis distance (MD) is the distance to the center of the training data. The larger the MD, the less trustworthy the prediction.

Mahalanobis Distance p-value: The p-value gives the fraction of training data with an MD greater than or equal to the one for the given sample, assuming normally distributed data. The smaller the p-value, the less trustworthy the prediction. For highly non-normal X properties (e.g., fingerprints), the MD p-value is wildly inaccurate.

### Structural Similar Compounds

| Name               | Ochratoxin a                             | Amsacrine                             | Benomyl                                   |
|--------------------|------------------------------------------|---------------------------------------|-------------------------------------------|
| Structure          |                                          |                                       |                                           |
| Actual Endpoint    | Toxic                                    | Toxic                                 | Toxic                                     |
| Predicted Endpoint | Toxic                                    | Toxic                                 | Toxic                                     |
| Distance           | 0.544                                    | 0.587                                 | 0.618                                     |
| Reference          | Toxicol Appl Pharmacol 37(2):331-8; 1976 | Fundam Appl Toxicol 7(2):214-20; 1986 | J Toxicol Environ Health 17:405-417; 1986 |

### Model Applicability

Unknown features are fingerprint features in the query molecule, but not found or appearing too infrequently in the training set.

- All properties and OPS components are within expected ranges.

### Feature Contribution

#### Top features for positive contribution

| Fingerprint | Bit/Smiles | Feature Structure              | Score | Toxic in training set |
|-------------|------------|--------------------------------|-------|-----------------------|
| SCFP_6      | 1631845520 | <br>[*]C(=*)N[c](:[*]):<br>[*] | 0.21  | 8 out of 12           |

|                                               |                   |                                                                                                                                          |              |                              |
|-----------------------------------------------|-------------------|------------------------------------------------------------------------------------------------------------------------------------------|--------------|------------------------------|
| SCFP_6                                        | 1205586762        | 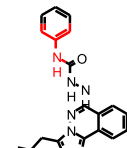<br><chem>[*]N[c](:[cH]:[*]):[cH]:[*]</chem>          | 0.139        | 11 out of 18                 |
| SCFP_6                                        | 1256786467        | <br><chem>[*]NC(=O)N[*]</chem>                        | 0.12         | 9 out of 15                  |
| <b>Top Features for negative contribution</b> |                   |                                                                                                                                          |              |                              |
| <b>Fingerprint</b>                            | <b>Bit/Smiles</b> | <b>Feature Structure</b>                                                                                                                 | <b>Score</b> | <b>Toxic in training set</b> |
| SCFP_6                                        | -572674910        | <br><chem>[*]:n1:[*]:[*]:n:[c]:1:[c](:[*]):[*]</chem> | -0.945       | 0 out of 3                   |
| SCFP_6                                        | 149212520         | <br><chem>[*][c](:[*]):n:n(:[*]):[*]</chem>          | -0.448       | 5 out of 16                  |
| SCFP_6                                        | 1424144789        | <br><chem>[*]C[c]1:n:[*]:[*]:n:1:[*]</chem>         | -0.438       | 1 out of 4                   |

8a

## TOPKAT\_Developmental\_Toxicity\_Potential

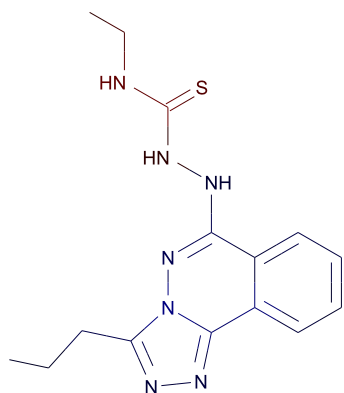C<sub>15</sub>H<sub>19</sub>N<sub>7</sub>S

Molecular Weight: 329.42325

ALogP: 3.388

Rotatable Bonds: 7

Acceptors: 5

Donors: 3

**Model Prediction**

Prediction: Non-Toxic

Probability: 0.451

Enrichment: 0.857

Bayesian Score: -2.74

Mahalanobis Distance: 9.32

Mahalanobis Distance p-value: 0.0982

Prediction: Positive if the Bayesian score is above the estimated best cutoff value from minimizing the false positive and false negative rate.

Probability: The estimated probability that the sample is in the positive category. This assumes that the Bayesian score follows a normal distribution and is different from the prediction using a cutoff.

Enrichment: An estimate of enrichment, that is, the increased likelihood (versus random) of this sample being in the category.

Bayesian Score: The standard Laplacian-modified Bayesian score.

Mahalanobis Distance: The Mahalanobis distance (MD) is the distance to the center of the training data. The larger the MD, the less trustworthy the prediction.

Mahalanobis Distance p-value: The p-value gives the fraction of training data with an MD greater than or equal to the one for the given sample, assuming normally distributed data. The smaller the p-value, the less trustworthy the prediction. For highly non-normal X properties (e.g., fingerprints), the MD p-value is wildly inaccurate.

**Structural Similar Compounds**

| Name               | Ochratoxin a                             | LY171883                               | Benomyl                                   |
|--------------------|------------------------------------------|----------------------------------------|-------------------------------------------|
| Structure          |                                          |                                        |                                           |
| Actual Endpoint    | Toxic                                    | Non-Toxic                              | Toxic                                     |
| Predicted Endpoint | Toxic                                    | Non-Toxic                              | Toxic                                     |
| Distance           | 0.641                                    | 0.645                                  | 0.671                                     |
| Reference          | Toxicol Appl Pharmacol 37(2):331-8; 1976 | Fundam Appl Toxicol 10(4):672-81; 1988 | J Toxicol Environ Health 17:405-417; 1986 |

**Model Applicability**

Unknown features are fingerprint features in the query molecule, but not found or appearing too infrequently in the training set.

1. All properties and OPS components are within expected ranges.

**Feature Contribution****Top features for positive contribution**

| Fingerprint | Bit/Smiles | Feature Structure   | Score | Toxic in training set |
|-------------|------------|---------------------|-------|-----------------------|
| SCFP_6      | 18058322   | <br>[*]CNC(=[*])[*] | 0.478 | 4 out of 4            |

|                                               |                   |                                                                                                                                          |              |                              |
|-----------------------------------------------|-------------------|------------------------------------------------------------------------------------------------------------------------------------------|--------------|------------------------------|
| SCFP_6                                        | 1435188938        | 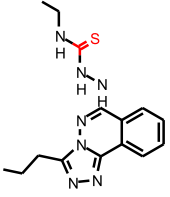<br><chem>[*]C(=S)[*]</chem>                          | 0.478        | 4 out of 4                   |
| SCFP_6                                        | 382734644         | <br><chem>[*]NC(=S)N[*]</chem>                        | 0.478        | 4 out of 4                   |
| <b>Top Features for negative contribution</b> |                   |                                                                                                                                          |              |                              |
| <b>Fingerprint</b>                            | <b>Bit/Smiles</b> | <b>Feature Structure</b>                                                                                                                 | <b>Score</b> | <b>Toxic in training set</b> |
| SCFP_6                                        | -572674910        | <br><chem>[*]:n1:[*]:[*]:n:[c]:1:[c](:[*]):[*]</chem> | -0.945       | 0 out of 3                   |
| SCFP_6                                        | 149212520         | <br><chem>[*][c](:[*]):n(:[*]):[*]</chem>            | -0.448       | 5 out of 16                  |
| SCFP_6                                        | 1424144789        | <br><chem>[*]C[c]1:n:[*]:[*]:n:1:[*]</chem>         | -0.438       | 1 out of 4                   |

8b

TOPKAT\_Developmental\_Toxicity\_Potential

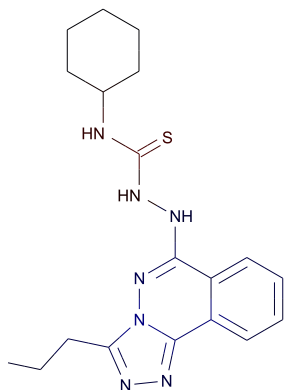C<sub>19</sub>H<sub>25</sub>N<sub>7</sub>S

Molecular Weight: 383.51369

ALogP: 4.898

Rotatable Bonds: 7

Acceptors: 5

Donors: 3

**Model Prediction**

Prediction: Non-Toxic

Probability: 0.46

Enrichment: 0.874

Bayesian Score: -2.47

Mahalanobis Distance: 11

Mahalanobis Distance p-value: 0.000957

Prediction: Positive if the Bayesian score is above the estimated best cutoff value from minimizing the false positive and false negative rate.

Probability: The estimated probability that the sample is in the positive category. This assumes that the Bayesian score follows a normal distribution and is different from the prediction using a cutoff.

Enrichment: An estimate of enrichment, that is, the increased likelihood (versus random) of this sample being in the category.

Bayesian Score: The standard Laplacian-modified Bayesian score.

Mahalanobis Distance: The Mahalanobis distance (MD) is the distance to the center of the training data. The larger the MD, the less trustworthy the prediction.

Mahalanobis Distance p-value: The p-value gives the fraction of training data with an MD greater than or equal to the one for the given sample, assuming normally distributed data. The smaller the p-value, the less trustworthy the prediction. For highly non-normal X properties (e.g., fingerprints), the MD p-value is wildly inaccurate.

**Structural Similar Compounds**

| Name               | Ochratoxin a                             | Amsacrine                             | Dobutamine .HCl (Free base form)   |
|--------------------|------------------------------------------|---------------------------------------|------------------------------------|
| Structure          |                                          |                                       |                                    |
| Actual Endpoint    | Toxic                                    | Toxic                                 | Toxic                              |
| Predicted Endpoint | Toxic                                    | Toxic                                 | Toxic                              |
| Distance           | 0.671                                    | 0.674                                 | 0.698                              |
| Reference          | Toxicol Appl Pharmacol 37(2):331-8; 1976 | Fundam Appl Toxicol 7(2):214-20; 1986 | Yakuri to Chiryō 7:1707-1730; 1979 |

**Model Applicability**

Unknown features are fingerprint features in the query molecule, but not found or appearing too infrequently in the training set.

1. All properties and OPS components are within expected ranges.

**Feature Contribution****Top features for positive contribution**

| Fingerprint | Bit/Smiles | Feature Structure | Score | Toxic in training set |
|-------------|------------|-------------------|-------|-----------------------|
| SCFP_6      | 1435188938 | <br>[*]C(=S)[*]   | 0.478 | 4 out of 4            |

|                                               |                   |                                                                                                                                 |              |                              |
|-----------------------------------------------|-------------------|---------------------------------------------------------------------------------------------------------------------------------|--------------|------------------------------|
| SCFP_6                                        | 18058322          | 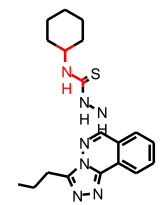<br>[*]CNC(=[*])[*]                           | 0.478        | 4 out of 4                   |
| SCFP_6                                        | 382734644         | <br>[*]NC(=S)N[*]                            | 0.478        | 4 out of 4                   |
| <b>Top Features for negative contribution</b> |                   |                                                                                                                                 |              |                              |
| <b>Fingerprint</b>                            | <b>Bit/Smiles</b> | <b>Feature Structure</b>                                                                                                        | <b>Score</b> | <b>Toxic in training set</b> |
| SCFP_6                                        | -572674910        | <br>[*]:n1:[*]:[*]:n:[c]:<br>1:[c](:[*]):[*] | -0.945       | 0 out of 3                   |
| SCFP_6                                        | 149212520         | <br>[*][c](:[*]):n:n(:[*]<br>):[*]          | -0.448       | 5 out of 16                  |
| SCFP_6                                        | 1424144789        | <br>[*]C[c]1:n:[*]:[*]:n:<br>1:[*]         | -0.438       | 1 out of 4                   |



9a

## TOPKAT\_Developmental\_Toxicity\_Potential

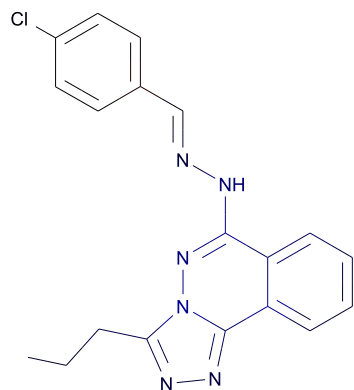C<sub>19</sub>H<sub>17</sub>ClN<sub>6</sub>

Molecular Weight: 364.83147

ALogP: 4.967

Rotatable Bonds: 5

Acceptors: 5

Donors: 1

**Model Prediction**

Prediction: Non-Toxic

Probability: 0.371

Enrichment: 0.706

Bayesian Score: -5.47

Mahalanobis Distance: 9.86

Mahalanobis Distance p-value: 0.0301

Prediction: Positive if the Bayesian score is above the estimated best cutoff value from minimizing the false positive and false negative rate.

Probability: The estimated probability that the sample is in the positive category. This assumes that the Bayesian score follows a normal distribution and is different from the prediction using a cutoff.

Enrichment: An estimate of enrichment, that is, the increased likelihood (versus random) of this sample being in the category.

Bayesian Score: The standard Laplacian-modified Bayesian score.

Mahalanobis Distance: The Mahalanobis distance (MD) is the distance to the center of the training data. The larger the MD, the less trustworthy the prediction.

Mahalanobis Distance p-value: The p-value gives the fraction of training data with an MD greater than or equal to the one for the given sample, assuming normally distributed data. The smaller the p-value, the less trustworthy the prediction. For highly non-normal X properties (e.g., fingerprints), the MD p-value is wildly inaccurate.

**Structural Similar Compounds**

| Name               | Perphenazine                             | Acemetacin                     | Amsacrine                             |
|--------------------|------------------------------------------|--------------------------------|---------------------------------------|
| Structure          |                                          |                                |                                       |
| Actual Endpoint    | Toxic                                    | Non-Toxic                      | Toxic                                 |
| Predicted Endpoint | Toxic                                    | Non-Toxic                      | Toxic                                 |
| Distance           | 0.579                                    | 0.618                          | 0.640                                 |
| Reference          | Toxicol Appl Pharmacol 21(2):230-6; 1972 | Oyo Yakuri 22(6):777-786; 1981 | Fundam Appl Toxicol 7(2):214-20; 1986 |

**Model Applicability**

Unknown features are fingerprint features in the query molecule, but not found or appearing too infrequently in the training set.

- All properties and OPS components are within expected ranges.

**Feature Contribution****Top features for positive contribution**

| Fingerprint | Bit/Smiles | Feature Structure                      | Score | Toxic in training set |
|-------------|------------|----------------------------------------|-------|-----------------------|
| SCFP_6      | 1390366442 | <br><chem>[*]N=C([c](:[*]):[*])</chem> | 0.381 | 2 out of 2            |

|                                               |                   |                                                                                                                                                |              |                              |
|-----------------------------------------------|-------------------|------------------------------------------------------------------------------------------------------------------------------------------------|--------------|------------------------------|
| SCFP_6                                        | -650738059        | 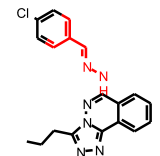<br><chem>[*]NN=C([c](:[cH]:[*]<br/>)):cH:[*]</chem>        | 0.271        | 1 out of 1                   |
| SCFP_6                                        | 1905487031        | <br><chem>[*][c]1:[cH]:[cH]:[c]<br/>(Cl):[cH]:[cH]:1</chem> | 0.153        | 2 out of 3                   |
| <b>Top Features for negative contribution</b> |                   |                                                                                                                                                |              |                              |
| <b>Fingerprint</b>                            | <b>Bit/Smiles</b> | <b>Feature Structure</b>                                                                                                                       | <b>Score</b> | <b>Toxic in training set</b> |
| SCFP_6                                        | -572674910        | <br><chem>[*]:n1:[*]:[*]:n:[c]:<br/>1:[c](:[*]):[*]</chem>  | -0.945       | 0 out of 3                   |
| SCFP_6                                        | 149212520         | <br><chem>[*][c](:[*]):n:n(:[*]<br/>):[*]</chem>           | -0.448       | 5 out of 16                  |
| SCFP_6                                        | 1424144789        | <br><chem>[*]C[c]1:n:[*]:[*]:n:<br/>1:[*]</chem>          | -0.438       | 1 out of 4                   |

9b

TOPKAT\_Developmental\_Toxicity\_Potential

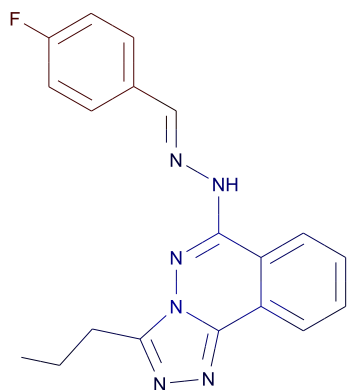

$C_{19}H_{17}FN_6$   
 Molecular Weight: 348.37688  
 ALogP: 4.508  
 Rotatable Bonds: 5  
 Acceptors: 5  
 Donors: 1

### Model Prediction

Prediction: Non-Toxic

Probability: 0.393

Enrichment: 0.748

Bayesian Score: -4.65

Mahalanobis Distance: 9.95

Mahalanobis Distance p-value: 0.0235

Prediction: Positive if the Bayesian score is above the estimated best cutoff value from minimizing the false positive and false negative rate.

Probability: The estimated probability that the sample is in the positive category. This assumes that the Bayesian score follows a normal distribution and is different from the prediction using a cutoff.

Enrichment: An estimate of enrichment, that is, the increased likelihood (versus random) of this sample being in the category.

Bayesian Score: The standard Laplacian-modified Bayesian score.

Mahalanobis Distance: The Mahalanobis distance (MD) is the distance to the center of the training data. The larger the MD, the less trustworthy the prediction.

Mahalanobis Distance p-value: The p-value gives the fraction of training data with an MD greater than or equal to the one for the given sample, assuming normally distributed data. The smaller the p-value, the less trustworthy the prediction. For highly non-normal X properties (e.g., fingerprints), the MD p-value is wildly inaccurate.

### Structural Similar Compounds

| Name               | Perphenazine                             | Amsacrine                             | Budralazine                    |
|--------------------|------------------------------------------|---------------------------------------|--------------------------------|
| Structure          |                                          |                                       |                                |
| Actual Endpoint    | Toxic                                    | Toxic                                 | Non-Toxic                      |
| Predicted Endpoint | Toxic                                    | Toxic                                 | Non-Toxic                      |
| Distance           | 0.601                                    | 0.622                                 | 0.623                          |
| Reference          | Toxicol Appl Pharmacol 21(2):230-6; 1972 | Fundam Appl Toxicol 7(2):214-20; 1986 | Oyo Yakuri 21(2):321-330; 1981 |

### Model Applicability

Unknown features are fingerprint features in the query molecule, but not found or appearing too infrequently in the training set.

1. All properties and OPS components are within expected ranges.

### Feature Contribution

#### Top features for positive contribution

| Fingerprint | Bit/Smiles  | Feature Structure                                       | Score | Toxic in training set |
|-------------|-------------|---------------------------------------------------------|-------|-----------------------|
| SCFP_6      | -1789136446 | <br><chem>[*]=C[c]1:[cH]:[cH]:[c](F):[cH]:[cH]:1</chem> | 0.381 | 2 out of 2            |

|                                               |                   |                                                                                                                                          |              |                              |
|-----------------------------------------------|-------------------|------------------------------------------------------------------------------------------------------------------------------------------|--------------|------------------------------|
| SCFP_6                                        | 1390366442        | 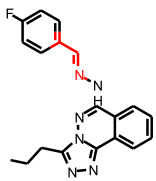<br><chem>[*]N=C(c(:[*]):[*])</chem>                  | 0.381        | 2 out of 2                   |
| SCFP_6                                        | -783770208        | <br><chem>F[c]1:[cH]:[cH]:[*]:[cH]:[cH]:1</chem>      | 0.322        | 4 out of 5                   |
| <b>Top Features for negative contribution</b> |                   |                                                                                                                                          |              |                              |
| <b>Fingerprint</b>                            | <b>Bit/Smiles</b> | <b>Feature Structure</b>                                                                                                                 | <b>Score</b> | <b>Toxic in training set</b> |
| SCFP_6                                        | -572674910        | <br><chem>[*]:n1:[*]:[*]:n:[c]:1:[c](:[*]):[*]</chem> | -0.945       | 0 out of 3                   |
| SCFP_6                                        | 149212520         | <br><chem>[*][c](:[*]):n:n(:[*]):[*]</chem>          | -0.448       | 5 out of 16                  |
| SCFP_6                                        | 1424144789        | <br><chem>[*]C[c]1:n:[*]:[*]:n:1:[*]</chem>         | -0.438       | 1 out of 4                   |

9c

TOPKAT\_Developmental\_Toxicity\_Potential

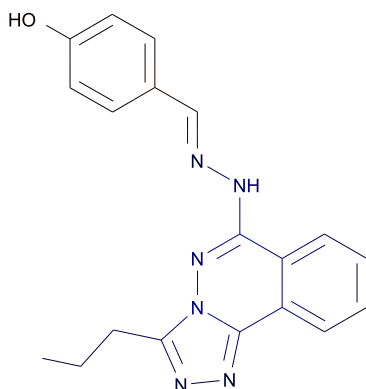C<sub>19</sub>H<sub>18</sub>N<sub>6</sub>O

Molecular Weight: 346.38582

ALogP: 4.061

Rotatable Bonds: 5

Acceptors: 6

Donors: 2

### Model Prediction

Prediction: Non-Toxic

Probability: 0.367

Enrichment: 0.698

Bayesian Score: -5.65

Mahalanobis Distance: 10.2

Mahalanobis Distance p-value: 0.0115

Prediction: Positive if the Bayesian score is above the estimated best cutoff value from minimizing the false positive and false negative rate.

Probability: The estimated probability that the sample is in the positive category. This assumes that the Bayesian score follows a normal distribution and is different from the prediction using a cutoff.

Enrichment: An estimate of enrichment, that is, the increased likelihood (versus random) of this sample being in the category.

Bayesian Score: The standard Laplacian-modified Bayesian score.

Mahalanobis Distance: The Mahalanobis distance (MD) is the distance to the center of the training data. The larger the MD, the less trustworthy the prediction.

Mahalanobis Distance p-value: The p-value gives the fraction of training data with an MD greater than or equal to the one for the given sample, assuming normally distributed data. The smaller the p-value, the less trustworthy the prediction. For highly non-normal X properties (e.g., fingerprints), the MD p-value is wildly inaccurate.

### Structural Similar Compounds

| Name               | Amsacrine                             | Ochratoxin a                             | Benomyl                                   |
|--------------------|---------------------------------------|------------------------------------------|-------------------------------------------|
| Structure          |                                       |                                          |                                           |
| Actual Endpoint    | Toxic                                 | Toxic                                    | Toxic                                     |
| Predicted Endpoint | Toxic                                 | Toxic                                    | Toxic                                     |
| Distance           | 0.546                                 | 0.625                                    | 0.640                                     |
| Reference          | Fundam Appl Toxicol 7(2):214-20; 1986 | Toxicol Appl Pharmacol 37(2):331-8; 1976 | J Toxicol Environ Health 17:405-417; 1986 |

### Model Applicability

Unknown features are fingerprint features in the query molecule, but not found or appearing too infrequently in the training set.

- All properties and OPS components are within expected ranges.

### Feature Contribution

#### Top features for positive contribution

| Fingerprint | Bit/Smiles | Feature Structure                      | Score | Toxic in training set |
|-------------|------------|----------------------------------------|-------|-----------------------|
| SCFP_6      | 1390366442 | <br><chem>[*]N=C([c](:[*]):[*])</chem> | 0.381 | 2 out of 2            |

|                                               |                   |                                                                                                                                           |              |                              |
|-----------------------------------------------|-------------------|-------------------------------------------------------------------------------------------------------------------------------------------|--------------|------------------------------|
| SCFP_6                                        | -650738059        | 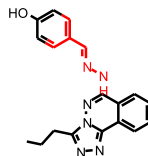<br><chem>[*]NN=C([c](:[cH]:[*] ):[cH]:[*] )</chem>    | 0.271        | 1 out of 1                   |
| SCFP_6                                        | -1374800107       | <br><chem>[*][c]1:[*]:[cH]:[c]( O):[cH]:[cH]:1</chem>  | 0.205        | 26 out of 40                 |
| <b>Top Features for negative contribution</b> |                   |                                                                                                                                           |              |                              |
| <b>Fingerprint</b>                            | <b>Bit/Smiles</b> | <b>Feature Structure</b>                                                                                                                  | <b>Score</b> | <b>Toxic in training set</b> |
| SCFP_6                                        | -572674910        | <br><chem>[*]:n1:[*]:[*]:n:[c]: 1:[c](:[*]):[*]</chem> | -0.945       | 0 out of 3                   |
| SCFP_6                                        | 149212520         | <br><chem>[*][c](:[*]):n:n(:[*] ):[*]</chem>          | -0.448       | 5 out of 16                  |
| SCFP_6                                        | 1424144789        | <br><chem>[*]C[c]1:n:[*]:[*]:n: 1:[*]</chem>         | -0.438       | 1 out of 4                   |

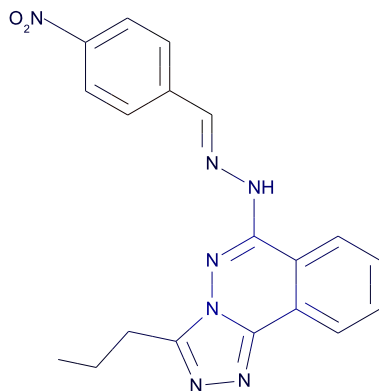

$C_{19}H_{17}N_7O_2$

Molecular Weight: 375.38397

ALogP: 4.197

Rotatable Bonds: 6

Acceptors: 7

Donors: 1

## Model Prediction

Prediction: Non-Toxic

Probability: 0.331

Enrichment: 0.629

Bayesian Score: -7.19

Mahalanobis Distance: 10.1

Mahalanobis Distance p-value: 0.0164

Prediction: Positive if the Bayesian score is above the estimated best cutoff value from minimizing the false positive and false negative rate.

Probability: The estimated probability that the sample is in the positive category. This assumes that the Bayesian score follows a normal distribution and is different from the prediction using a cutoff.

Enrichment: An estimate of enrichment, that is, the increased likelihood (versus random) of this sample being in the category.

Bayesian Score: The standard Laplacian-modified Bayesian score.

Mahalanobis Distance: The Mahalanobis distance (MD) is the distance to the center of the training data. The larger the MD, the less trustworthy the prediction.

Mahalanobis Distance p-value: The p-value gives the fraction of training data with an MD greater than or equal to the one for the given sample, assuming normally distributed data. The smaller the p-value, the less trustworthy the prediction. For highly non-normal X properties (e.g., fingerprints), the MD p-value is wildly inaccurate.

## Structural Similar Compounds

| Name               | Acemetacin                     | Amsacrine                             | Bunazosin .HCl (Free base form) |
|--------------------|--------------------------------|---------------------------------------|---------------------------------|
| Structure          |                                |                                       |                                 |
| Actual Endpoint    | Non-Toxic                      | Toxic                                 | Toxic                           |
| Predicted Endpoint | Non-Toxic                      | Toxic                                 | Toxic                           |
| Distance           | 0.608                          | 0.665                                 | 0.671                           |
| Reference          | Oyo Yakuri 22(6):777-786; 1981 | Fundam Appl Toxicol 7(2):214-20; 1986 | Kiso to Rinsho 17:914-924; 1983 |

## Model Applicability

Unknown features are fingerprint features in the query molecule, but not found or appearing too infrequently in the training set.

1. All properties and OPS components are within expected ranges.

## Feature Contribution

### Top features for positive contribution

| Fingerprint | Bit/Smiles | Feature Structure                      | Score | Toxic in training set |
|-------------|------------|----------------------------------------|-------|-----------------------|
| SCFP_6      | 1390366442 | <br><chem>[*]N=C([c](:[*]):[*])</chem> | 0.381 | 2 out of 2            |

|                                               |                   |                                                                                                                                               |              |                              |
|-----------------------------------------------|-------------------|-----------------------------------------------------------------------------------------------------------------------------------------------|--------------|------------------------------|
| SCFP_6                                        | -650738059        | 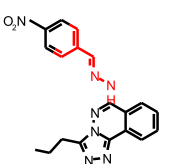<br>[*]NIN=C[c](:[cH]:[*]<br>):[cH]:[*]                    | 0.271        | 1 out of 1                   |
| SCFP_6                                        | -2056718782       | <br>[*]=C[c](:[cH]:[*]):[<br>cH]:[*]                       | 0.0786       | 33 out of 58                 |
| <b>Top Features for negative contribution</b> |                   |                                                                                                                                               |              |                              |
| <b>Fingerprint</b>                            | <b>Bit/Smiles</b> | <b>Feature Structure</b>                                                                                                                      | <b>Score</b> | <b>Toxic in training set</b> |
| SCFP_6                                        | -572674910        | <br>[*]:n1:[*]:[*]:n:[c]:<br>1:[c](:[*]):[*]               | -0.945       | 0 out of 3                   |
| SCFP_6                                        | -1380909229       | <br>[*][c]1:[*]:[cH]:[c]<br>:[cH]:[cH]:1[N+](=[<br>*])[*] | -0.449       | 6 out of 19                  |
| SCFP_6                                        | 149212520         | <br>[*][c](:[*]):n(:[*]<br>):[*]                         | -0.448       | 5 out of 16                  |



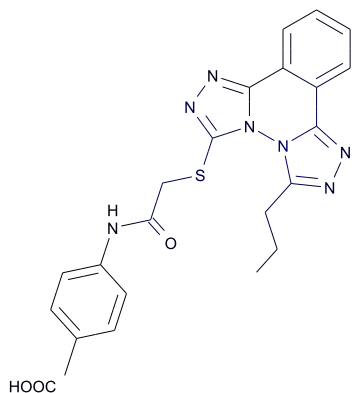

$C_{22}H_{19}N_7O_3S$

Molecular Weight: 461.49635

ALogP: 3.42

Rotatable Bonds: 7

Acceptors: 8

Donors: 2

## Model Prediction

Prediction: Non-Toxic

Probability: 0.368

Enrichment: 0.699

Bayesian Score: -5.62

Mahalanobis Distance: 10.7

Mahalanobis Distance p-value: 0.00292

Prediction: Positive if the Bayesian score is above the estimated best cutoff value from minimizing the false positive and false negative rate.

Probability: The estimated probability that the sample is in the positive category. This assumes that the Bayesian score follows a normal distribution and is different from the prediction using a cutoff.

Enrichment: An estimate of enrichment, that is, the increased likelihood (versus random) of this sample being in the category.

Bayesian Score: The standard Laplacian-modified Bayesian score.

Mahalanobis Distance: The Mahalanobis distance (MD) is the distance to the center of the training data. The larger the MD, the less trustworthy the prediction.

Mahalanobis Distance p-value: The p-value gives the fraction of training data with an MD greater than or equal to the one for the given sample, assuming normally distributed data. The smaller the p-value, the less trustworthy the prediction. For highly non-normal X properties (e.g., fingerprints), the MD p-value is wildly inaccurate.

## Structural Similar Compounds

| Name               | Ochratoxin a                             | LY171883                               | Lenampicillin .HCl (Free base form) |
|--------------------|------------------------------------------|----------------------------------------|-------------------------------------|
| Structure          |                                          |                                        |                                     |
| Actual Endpoint    | Toxic                                    | Non-Toxic                              | Non-Toxic                           |
| Predicted Endpoint | Toxic                                    | Non-Toxic                              | Non-Toxic                           |
| Distance           | 0.682                                    | 0.698                                  | 0.703                               |
| Reference          | Toxicol Appl Pharmacol 37(2):331-8; 1976 | Fundam Appl Toxicol 10(4):672-81; 1988 | Chemotherapy 32:130-145; 1984       |

## Model Applicability

Unknown features are fingerprint features in the query molecule, but not found or appearing too infrequently in the training set.

1. All properties and OPS components are within expected ranges.

## Feature Contribution

### Top features for positive contribution

| Fingerprint | Bit/Smiles | Feature Structure                        | Score | Toxic in training set |
|-------------|------------|------------------------------------------|-------|-----------------------|
| SCFP_6      | 1623050981 | <br>OC(=O)[c]1[cH][cH]:<br>[*][cH][cH]:1 | 0.271 | 1 out of 1            |

|                                               |                   |                                                                                                                                 |              |                              |
|-----------------------------------------------|-------------------|---------------------------------------------------------------------------------------------------------------------------------|--------------|------------------------------|
| SCFP_6                                        | 1631845520        | 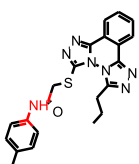<br>[*]C(=[*])N[*]:<br>[*]                   | 0.21         | 8 out of 12                  |
| SCFP_6                                        | 1205586762        | <br>[*]N[c]([*]):[c<br>H]:[*]                | 0.139        | 11 out of 18                 |
| <b>Top Features for negative contribution</b> |                   |                                                                                                                                 |              |                              |
| <b>Fingerprint</b>                            | <b>Bit/Smiles</b> | <b>Feature Structure</b>                                                                                                        | <b>Score</b> | <b>Toxic in training set</b> |
| SCFP_6                                        | -572674910        | <br>[*]:n1[*]:n:[c]:<br>1:[c]([*]):[*]       | -0.945       | 0 out of 3                   |
| SCFP_6                                        | -299471172        | <br>[*]C(=[*])CS[c]1:n:[*]<br>]:[*]:n:1:[*] | -0.594       | 1 out of 5                   |
| SCFP_6                                        | 149212520         | <br>[*][c]([*]):n:([*]<br>):[*]            | -0.448       | 5 out of 16                  |

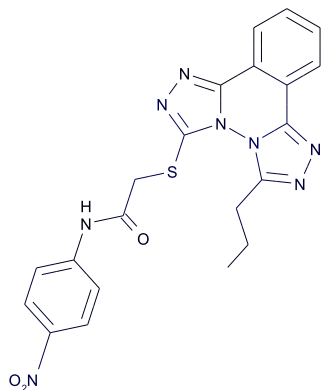

$C_{21}H_{18}N_8O_3S$

Molecular Weight: 462.48441

ALogP: 3.685

Rotatable Bonds: 7

Acceptors: 8

Donors: 1

## Model Prediction

Prediction: Non-Toxic

Probability: 0.344

Enrichment: 0.654

Bayesian Score: -6.6

Mahalanobis Distance: 11.1

Mahalanobis Distance p-value: 0.000823

Prediction: Positive if the Bayesian score is above the estimated best cutoff value from minimizing the false positive and false negative rate.

Probability: The estimated probability that the sample is in the positive category. This assumes that the Bayesian score follows a normal distribution and is different from the prediction using a cutoff.

Enrichment: An estimate of enrichment, that is, the increased likelihood (versus random) of this sample being in the category.

Bayesian Score: The standard Laplacian-modified Bayesian score.

Mahalanobis Distance: The Mahalanobis distance (MD) is the distance to the center of the training data. The larger the MD, the less trustworthy the prediction.

Mahalanobis Distance p-value: The p-value gives the fraction of training data with an MD greater than or equal to the one for the given sample, assuming normally distributed data. The smaller the p-value, the less trustworthy the prediction. For highly non-normal X properties (e.g., fingerprints), the MD p-value is wildly inaccurate.

## Structural Similar Compounds

| Name               | Acemetacin                     | Beclomethasone Dipropionate      | Hydrocortisone-17-butyrate-21-propionate |
|--------------------|--------------------------------|----------------------------------|------------------------------------------|
| Structure          |                                |                                  |                                          |
| Actual Endpoint    | Non-Toxic                      | Toxic                            | Toxic                                    |
| Predicted Endpoint | Non-Toxic                      | Toxic                            | Toxic                                    |
| Distance           | 0.701                          | 0.730                            | 0.731                                    |
| Reference          | Oyo Yakuri 22(6):777-786; 1981 | Oyo Yakuri 18(6):1021-1038; 1979 | Oyo Yakuri 21:441-466; 1981              |

## Model Applicability

Unknown features are fingerprint features in the query molecule, but not found or appearing too infrequently in the training set.

1. All properties and OPS components are within expected ranges.

## Feature Contribution

### Top features for positive contribution

| Fingerprint | Bit/Smiles | Feature Structure           | Score | Toxic in training set |
|-------------|------------|-----------------------------|-------|-----------------------|
| SCFP_6      | 1631845520 | <br>[*]C(=[*])N(c(:[*]))[*] | 0.21  | 8 out of 12           |

|                                               |                   |                                                                                                                                                      |              |                              |
|-----------------------------------------------|-------------------|------------------------------------------------------------------------------------------------------------------------------------------------------|--------------|------------------------------|
| SCFP_6                                        | 1205586762        | 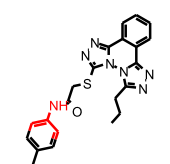<br><chem>[*]N(c1ccc(NC(=O)O)cc1):[*]:[cH]:[*]</chem>             | 0.139        | 11 out of 18                 |
| SCFP_6                                        | 9                 | <br><chem>[*]N[*]</chem>                                          | 0.0928       | 45 out of 78                 |
| <b>Top Features for negative contribution</b> |                   |                                                                                                                                                      |              |                              |
| <b>Fingerprint</b>                            | <b>Bit/Smiles</b> | <b>Feature Structure</b>                                                                                                                             | <b>Score</b> | <b>Toxic in training set</b> |
| SCFP_6                                        | -572674910        | <br><chem>[*]:n1N[*]:[*]:n:[c]:1:[c](-[*]):[*]</chem>             | -0.945       | 0 out of 3                   |
| SCFP_6                                        | -299471172        | <br><chem>[*]C(=[*])CS(c1n:n:[*]:[*]:n:1:[*])</chem>             | -0.594       | 1 out of 5                   |
| SCFP_6                                        | -1380909229       | <br><chem>[*][c]1:[*]:[cH]:[c]([cH]:[cH]:1)[N+](=[*])[*]</chem> | -0.449       | 6 out of 19                  |

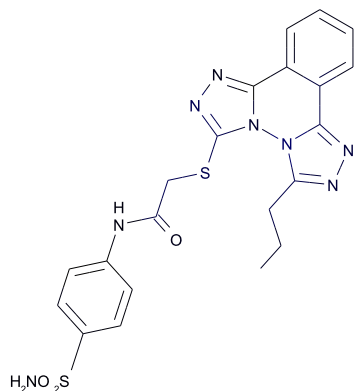

$C_{21}H_{20}N_8O_3S_2$

Molecular Weight: 496.56529

ALogP: 2.496

Rotatable Bonds: 7

Acceptors: 8

Donors: 2

## Model Prediction

Prediction: Non-Toxic

Probability: 0.367

Enrichment: 0.698

Bayesian Score: -5.64

Mahalanobis Distance: 9.96

Mahalanobis Distance p-value: 0.0234

Prediction: Positive if the Bayesian score is above the estimated best cutoff value from minimizing the false positive and false negative rate.

Probability: The estimated probability that the sample is in the positive category. This assumes that the Bayesian score follows a normal distribution and is different from the prediction using a cutoff.

Enrichment: An estimate of enrichment, that is, the increased likelihood (versus random) of this sample being in the category.

Bayesian Score: The standard Laplacian-modified Bayesian score.

Mahalanobis Distance: The Mahalanobis distance (MD) is the distance to the center of the training data. The larger the MD, the less trustworthy the prediction.

Mahalanobis Distance p-value: The p-value gives the fraction of training data with an MD greater than or equal to the one for the given sample, assuming normally distributed data. The smaller the p-value, the less trustworthy the prediction. For highly non-normal X properties (e.g., fingerprints), the MD p-value is wildly inaccurate.

## Structural Similar Compounds

| Name               | Lenampicillin .HCl (Free base form) | Bacampicillin .HCl (Free base form) | Cyclic AMP Bucladesine         |
|--------------------|-------------------------------------|-------------------------------------|--------------------------------|
| Structure          |                                     |                                     |                                |
| Actual Endpoint    | Non-Toxic                           | Toxic                               | Non-Toxic                      |
| Predicted Endpoint | Non-Toxic                           | Non-Toxic                           | Non-Toxic                      |
| Distance           | 0.640                               | 0.686                               | 0.711                          |
| Reference          | Chemotherapy 32:130-145; 1984       | Chemotherapy 27:30-35; 1979         | Oyo Yakuri 27(3):585-597; 1984 |

## Model Applicability

Unknown features are fingerprint features in the query molecule, but not found or appearing too infrequently in the training set.

1. All properties and OPS components are within expected ranges.

## Feature Contribution

### Top features for positive contribution

| Fingerprint | Bit/Smiles | Feature Structure                                           | Score | Toxic in training set |
|-------------|------------|-------------------------------------------------------------|-------|-----------------------|
| SCFP_6      | 1247518081 | <br><chem>HNO.S NS(=O)(=O)[c]1:[cH]:[cH]:[cH]:[cH]:1</chem> | 0.271 | 1 out of 1            |

| SCFP_6                                 | -1380395165 | 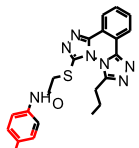<br>[*][c]1:[S][cH]:[c](<br>:[cH]:[cH]:1)S(=[*])<br>(=[*])[*]       | 0.255  | 3 out of 4            |
|----------------------------------------|-------------|--------------------------------------------------------------------------------------------------------------------------------------------------------|--------|-----------------------|
| SCFP_6                                 | 1631845520  | <br>HNO <sub>2</sub> S<br>[*]C(=[*])N[c](:[*]):<br>[*]              | 0.21   | 8 out of 12           |
| Top Features for negative contribution |             |                                                                                                                                                        |        |                       |
| Fingerprint                            | Bit/Smiles  | Feature Structure                                                                                                                                      | Score  | Toxic in training set |
| SCFP_6                                 | -572674910  | <br>HNO <sub>2</sub> S<br>[*]Cn1:[*]:[*]:n:[c]:<br>1:[c](:[*]):[*]  | -0.945 | 0 out of 3            |
| SCFP_6                                 | -1463646519 | <br>[*]C[CH]:[c](:[cH]:[*]<br>])S(=O)(=O)N                         | -0.718 | 0 out of 2            |
| SCFP_6                                 | -299471172  | <br>HNO <sub>2</sub> S<br>[*]C(=[*])CS[c]1:n:[*]<br>]:[*]:n:1:[*] | -0.594 | 1 out of 5            |

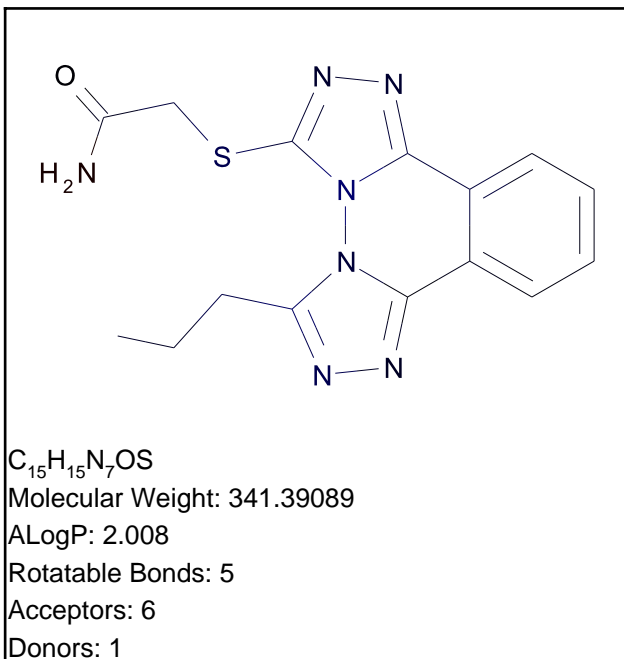

### Model Prediction

Prediction: Non-Toxic

Probability: 0.382

Enrichment: 0.725

Bayesian Score: -5.08

Mahalanobis Distance: 9.46

Mahalanobis Distance p-value: 0.0743

Prediction: Positive if the Bayesian score is above the estimated best cutoff value from minimizing the false positive and false negative rate.

Probability: The estimated probability that the sample is in the positive category. This assumes that the Bayesian score follows a normal distribution and is different from the prediction using a cutoff.

Enrichment: An estimate of enrichment, that is, the increased likelihood (versus random) of this sample being in the category.

Bayesian Score: The standard Laplacian-modified Bayesian score.

Mahalanobis Distance: The Mahalanobis distance (MD) is the distance to the center of the training data. The larger the MD, the less trustworthy the prediction.

Mahalanobis Distance p-value: The p-value gives the fraction of training data with an MD greater than or equal to the one for the given sample, assuming normally distributed data. The smaller the p-value, the less trustworthy the prediction. For highly non-normal X properties (e.g., fingerprints), the MD p-value is wildly inaccurate.

### Structural Similar Compounds

| Name               | Guthion                                                                             | Prazosin .HCl (Free base form)                                                      | Dinoseb                                                                             |
|--------------------|-------------------------------------------------------------------------------------|-------------------------------------------------------------------------------------|-------------------------------------------------------------------------------------|
| Structure          | 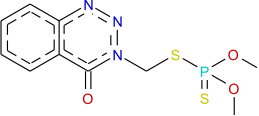 |  |  |
| Actual Endpoint    | Non-Toxic                                                                           | Toxic                                                                               | Toxic                                                                               |
| Predicted Endpoint | Non-Toxic                                                                           | Toxic                                                                               | Toxic                                                                               |
| Distance           | 0.630                                                                               | 0.653                                                                               | 0.657                                                                               |
| Reference          | Arch Toxicol 43:177-186; 1980                                                       | Oyo Yakuri 17:57-62; 1979                                                           | Arch Environ Contam Toxicol 15(4):377-84; 1986                                      |

### Model Applicability

Unknown features are fingerprint features in the query molecule, but not found or appearing too infrequently in the training set.

1. All properties and OPS components are within expected ranges.

### Feature Contribution

#### Top features for positive contribution

| Fingerprint | Bit/Smiles | Feature Structure                                                                                               | Score | Toxic in training set |
|-------------|------------|-----------------------------------------------------------------------------------------------------------------|-------|-----------------------|
| SCFP_6      | 1357949052 | 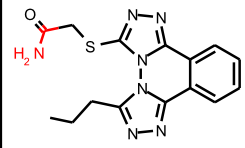<br><chem>[*]C(=*)N</chem> | 0.453 | 8 out of 9            |

|                                               |                   |                                                                                                                                 |              |                              |
|-----------------------------------------------|-------------------|---------------------------------------------------------------------------------------------------------------------------------|--------------|------------------------------|
| SCFP_6                                        | 9                 | 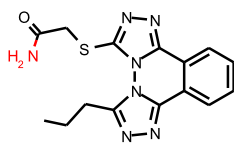<br>[*]N[*]                                  | 0.0928       | 45 out of 78                 |
| SCFP_6                                        | -1272798659       | <br>[*]CCC                                   | 0.0708       | 44 out of 78                 |
| <b>Top Features for negative contribution</b> |                   |                                                                                                                                 |              |                              |
| <b>Fingerprint</b>                            | <b>Bit/Smiles</b> | <b>Feature Structure</b>                                                                                                        | <b>Score</b> | <b>Toxic in training set</b> |
| SCFP_6                                        | -572674910        | <br>[*]:n1:[*]:[*]:n:[c]:<br>1:[c](:[*]):[*] | -0.945       | 0 out of 3                   |
| SCFP_6                                        | -299471172        | <br>[*]C(=[*])CS[c]1:n:[*]<br>]:[*]:n:1:[*] | -0.594       | 1 out of 5                   |
| SCFP_6                                        | 149212520         | <br>[*][c](:[*]):n:n(:[*]<br>):[*]         | -0.448       | 5 out of 16                  |



# Doxorubicin

# TOPKAT\_Developmental\_Toxicity\_Potential

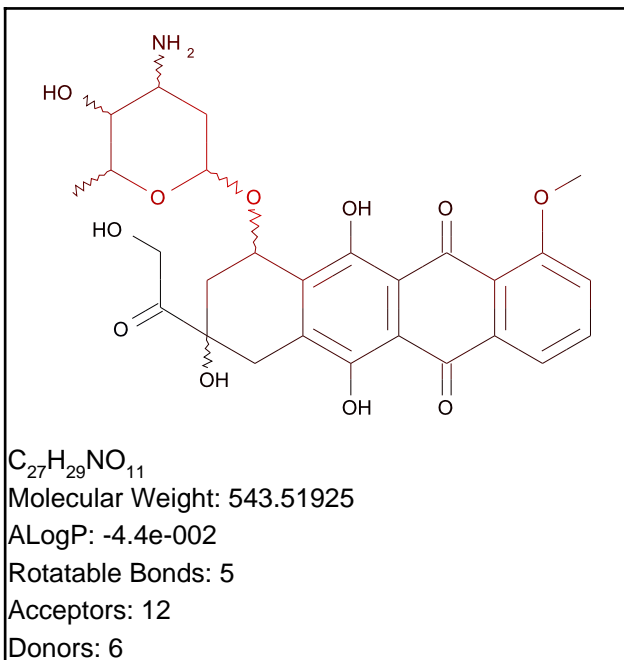

## Model Prediction

Prediction: Toxic

Probability: 0.882

Enrichment: 1.68

Bayesian Score: 9.61

Mahalanobis Distance: 11.3

Mahalanobis Distance p-value: 0.000349

Prediction: Positive if the Bayesian score is above the estimated best cutoff value from minimizing the false positive and false negative rate.

Probability: The estimated probability that the sample is in the positive category. This assumes that the Bayesian score follows a normal distribution and is different from the prediction using a cutoff.

Enrichment: An estimate of enrichment, that is, the increased likelihood (versus random) of this sample being in the category.

Bayesian Score: The standard Laplacian-modified Bayesian score.

Mahalanobis Distance: The Mahalanobis distance (MD) is the distance to the center of the training data. The larger the MD, the less trustworthy the prediction.

Mahalanobis Distance p-value: The p-value gives the fraction of training data with an MD greater than or equal to the one for the given sample, assuming normally distributed data. The smaller the p-value, the less trustworthy the prediction. For highly non-normal X properties (e.g., fingerprints), the MD p-value is wildly inaccurate.

## Structural Similar Compounds

| Name               | Cefpiramide Sodium (Free acid form)                                                 | Latomoxef                                                                           | Cefoperazone                                                                        |
|--------------------|-------------------------------------------------------------------------------------|-------------------------------------------------------------------------------------|-------------------------------------------------------------------------------------|
| Structure          | 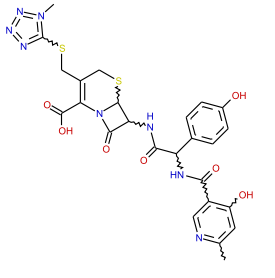 |  |  |
| Actual Endpoint    | Non-Toxic                                                                           | Toxic                                                                               | Non-Toxic                                                                           |
| Predicted Endpoint | Non-Toxic                                                                           | Non-Toxic                                                                           | Non-Toxic                                                                           |
| Distance           | 0.760                                                                               | 0.821                                                                               | 0.850                                                                               |
| Reference          | Kiso to Rinsho 17:1000-1004; 1983                                                   | Chemotherapy 28:1119-1141; 1980                                                     | Chemotherapy 28:268-291; 1980                                                       |

## Model Applicability

Unknown features are fingerprint features in the query molecule, but not found or appearing too infrequently in the training set.

1. All properties and OPS components are within expected ranges.

## Feature Contribution

### Top features for positive contribution

| Fingerprint | Bit/Smiles | Feature Structure                                                                                                                               | Score | Toxic in training set |
|-------------|------------|-------------------------------------------------------------------------------------------------------------------------------------------------|-------|-----------------------|
| SCFP_6      | 1702724181 | 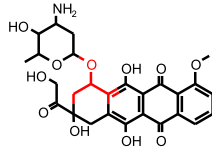<br><chem>[*]CC(O[*])[c](:[*]):</chem><br><chem>[*]</chem> | 0.558 | 9 out of 9            |

| SCFP_6                                        | -2031220028 | 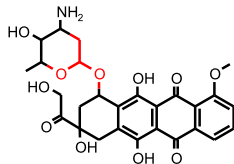<br><chem>[*]CC(O[*])O[*]</chem>                   | 0.538  | 7 out of 7            |
|-----------------------------------------------|-------------|---------------------------------------------------------------------------------------------------------------------------------------|--------|-----------------------|
| SCFP_6                                        | -37268149   | <br><chem>[*]OC1C[*]C(=O)C(O)O1</chem>             | 0.523  | 6 out of 6            |
| <b>Top Features for negative contribution</b> |             |                                                                                                                                       |        |                       |
| Fingerprint                                   | Bit/Smiles  | Feature Structure                                                                                                                     | Score  | Toxic in training set |
| SCFP_6                                        | -1379591900 | <br><chem>[*]:[c]:[*]:[cH]:[cH]:[cH]:[cH]:1</chem> | -0.282 | 33 out of 84          |
| SCFP_6                                        | 834949365   | <br><chem>[*]C(=O)C(=O)CO</chem>                  | -0.252 | 1 out of 3            |
| SCFP_6                                        | 1505318543  | <br><chem>[*]:[c]:[*]C(=O)[c](-[*]):[*]</chem>   | -0.189 | 2 out of 5            |

7a

## TOPKAT\_Ocular\_Irritancy\_Mild\_vs\_Moderate\_Severe

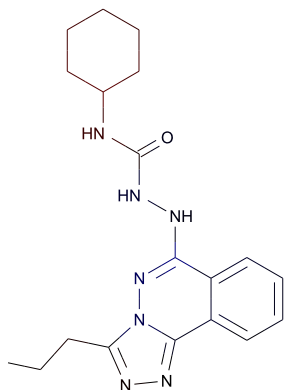C<sub>19</sub>H<sub>25</sub>N<sub>7</sub>O

Molecular Weight: 367.44809

ALogP: 3.681

Rotatable Bonds: 5

Acceptors: 5

Donors: 3

**Model Prediction**

Prediction: Mild

Probability: 0.785

Enrichment: 1.14

Bayesian Score: -1.52

Mahalanobis Distance: 10.2

Mahalanobis Distance p-value: 0.0511

Prediction: Positive if the Bayesian score is above the estimated best cutoff value from minimizing the false positive and false negative rate.

Probability: The estimated probability that the sample is in the positive category. This assumes that the Bayesian score follows a normal distribution and is different from the prediction using a cutoff.

Enrichment: An estimate of enrichment, that is, the increased likelihood (versus random) of this sample being in the category.

Bayesian Score: The standard Laplacian-modified Bayesian score.

Mahalanobis Distance: The Mahalanobis distance (MD) is the distance to the center of the training data. The larger the MD, the less trustworthy the prediction.

Mahalanobis Distance p-value: The p-value gives the fraction of training data with an MD greater than or equal to the one for the given sample, assuming normally distributed data. The smaller the p-value, the less trustworthy the prediction. For highly non-normal X properties (e.g., fingerprints), the MD p-value is wildly inaccurate.

**Structural Similar Compounds**

| Name               | ANTHRAQUINONE; 1-((2-HYDROXYETHYL)AMINO)-4-(METHYLAMINO)- | ANTHRAQUINONE; 1-AMINO-4-HYDROXY-2-PHENOXY- | METHANE;TRIS(4-AMINOPHENYL)- |
|--------------------|-----------------------------------------------------------|---------------------------------------------|------------------------------|
| Structure          |                                                           |                                             |                              |
| Actual Endpoint    | Mild                                                      | Mild                                        | Moderate_Severe              |
| Predicted Endpoint | Mild                                                      | Mild                                        | Moderate_Severe              |
| Distance           | 0.695                                                     | 0.733                                       | 0.733                        |
| Reference          | 28ZPAK 245;72                                             | 28ZPAK 239;72                               | 28ZPAK-;73;72                |

**Model Applicability**

Unknown features are fingerprint features in the query molecule, but not found or appearing too infrequently in the training set.

1. All properties and OPS components are within expected ranges.
2. Unknown FCFP\_2 feature: -1151884458: [\*]N[c](:n:[\*]):[c](:[\*]):[\*]
3. Unknown FCFP\_2 feature: -1564473960: [\*]:n1:[\*]:[\*]:n:[c]:1:[c](:[\*]):[\*]
4. Unknown FCFP\_2 feature: -885461129: [\*]NNC(=[\*])[\*]

**Feature Contribution****Top features for positive contribution**

| Fingerprint | Bit/Smiles | Feature Structure       | Score | Moderate_Severe in training set |
|-------------|------------|-------------------------|-------|---------------------------------|
| FCFP_10     | -796673622 | <br>[*]C(=*)NC1CC[*]CC1 | 0.317 | 4 out of 4                      |

|                                               |                   |                                                                                                                                          |              |                                        |
|-----------------------------------------------|-------------------|------------------------------------------------------------------------------------------------------------------------------------------|--------------|----------------------------------------|
| FCFP_10                                       | -1539162406       | 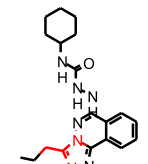<br><chem>[*]C[c]1:n:[*]:[*]:n:1:[*]</chem>           | 0.294        | 3 out of 3                             |
| FCFP_10                                       | 654530535         | <br><chem>[*]C(=[*])NC1CCCCC1</chem>                  | 0.294        | 3 out of 3                             |
| <b>Top Features for negative contribution</b> |                   |                                                                                                                                          |              |                                        |
| <b>Fingerprint</b>                            | <b>Bit/Smiles</b> | <b>Feature Structure</b>                                                                                                                 | <b>Score</b> | <b>Moderate_Severe in training set</b> |
| FCFP_10                                       | 4427049           | <br><chem>[*][c](:[*]):n:n(:[*]):[*]</chem>           | -1.29        | 0 out of 4                             |
| FCFP_10                                       | -332197802        | <br><chem>[*][c]1:[*]:[*]:[c](:[*]):n:1:n:[*]</chem> | -0.507       | 0 out of 1                             |
| FCFP_10                                       | 1294344583        | <br><chem>[*]NN[c](:[*]):[*]</chem>                 | -0.507       | 0 out of 1                             |

7b

## TOPKAT\_Ocular\_Irritancy\_Mild\_vs\_Moderate\_Severe

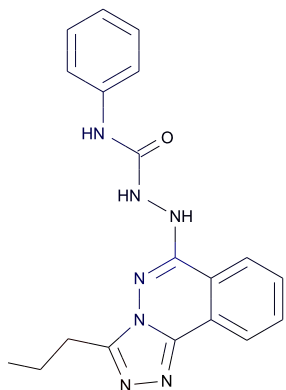C<sub>19</sub>H<sub>19</sub>N<sub>7</sub>O

Molecular Weight: 361.40046

ALogP: 3.399

Rotatable Bonds: 5

Acceptors: 5

Donors: 3

**Model Prediction**

Prediction: Mild

Probability: 0.643

Enrichment: 0.933

Bayesian Score: -4.44

Mahalanobis Distance: 6.86

Mahalanobis Distance p-value: 0.999

Prediction: Positive if the Bayesian score is above the estimated best cutoff value from minimizing the false positive and false negative rate.

Probability: The estimated probability that the sample is in the positive category. This assumes that the Bayesian score follows a normal distribution and is different from the prediction using a cutoff.

Enrichment: An estimate of enrichment, that is, the increased likelihood (versus random) of this sample being in the category.

Bayesian Score: The standard Laplacian-modified Bayesian score.

Mahalanobis Distance: The Mahalanobis distance (MD) is the distance to the center of the training data. The larger the MD, the less trustworthy the prediction.

Mahalanobis Distance p-value: The p-value gives the fraction of training data with an MD greater than or equal to the one for the given sample, assuming normally distributed data. The smaller the p-value, the less trustworthy the prediction. For highly non-normal X properties (e.g., fingerprints), the MD p-value is wildly inaccurate.

**Structural Similar Compounds**

| Name               | ANTHRAQUINONE; 1-((2-HYDROXYETHYL)AMINO)-4-(METHYLAMINO)- | METHANE;TRIS(4-AMINOPHENYL)- | ANTHRAQUINONE; 1-AMINO-4-HYDROXY-2-PHENOXY- |
|--------------------|-----------------------------------------------------------|------------------------------|---------------------------------------------|
| Structure          |                                                           |                              |                                             |
| Actual Endpoint    | Mild                                                      | Moderate_Severe              | Mild                                        |
| Predicted Endpoint | Mild                                                      | Moderate_Severe              | Mild                                        |
| Distance           | 0.653                                                     | 0.709                        | 0.719                                       |
| Reference          | 28ZPAK 245;72                                             | 28ZPAK-;73;72                | 28ZPAK 239;72                               |

**Model Applicability**

Unknown features are fingerprint features in the query molecule, but not found or appearing too infrequently in the training set.

1. All properties and OPS components are within expected ranges.
2. Unknown FCFP\_2 feature: -1151884458: [\*]N[c](:n:[\*]):[c](:[\*]):[\*]
3. Unknown FCFP\_2 feature: -1564473960: [\*]:n1:[\*]:[\*]:n:[c]:1:[c](:[\*]):[\*]
4. Unknown FCFP\_2 feature: -885461129: [\*]NNC(=[\*])[\*]

**Feature Contribution****Top features for positive contribution**

| Fingerprint | Bit/Smiles  | Feature Structure              | Score | Moderate_Severe in training set |
|-------------|-------------|--------------------------------|-------|---------------------------------|
| FCFP_10     | -1539162406 | <br>[*]C[c]1:n:[*]:[*]:n:1:[*] | 0.294 | 3 out of 3                      |

|                                               |                   |                                                                                                                                 |              |                                            |
|-----------------------------------------------|-------------------|---------------------------------------------------------------------------------------------------------------------------------|--------------|--------------------------------------------|
| FCFP_10                                       | -402549409        | 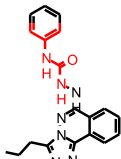<br>[*]NC(=O)Nc(:[cH]:[<br>*]):[cH]:[*]      | 0.186        | 1 out of 1                                 |
| FCFP_10                                       | 3                 | <br>[*]N[*]                                  | 0.165        | 383 out of 491                             |
| <b>Top Features for negative contribution</b> |                   |                                                                                                                                 |              |                                            |
| <b>Fingerprint</b>                            | <b>Bit/Smiles</b> | <b>Feature Structure</b>                                                                                                        | <b>Score</b> | <b>Moderate_Severe<br/>in training set</b> |
| FCFP_10                                       | 4427049           | <br>[*][c]:[*]:n:n(:[*]<br>):[*]             | -1.29        | 0 out of 4                                 |
| FCFP_10                                       | 1294344583        | <br>[*]NN[c]:[*]:[*]                        | -0.507       | 0 out of 1                                 |
| FCFP_10                                       | -332197802        | <br>[*][c]1:[*]:[*]:[c]:<br>[*]):n:1:n:[*] | -0.507       | 0 out of 1                                 |

8a

## TOPKAT\_Ocular\_Irritancy\_Mild\_vs\_Moderate\_Severe

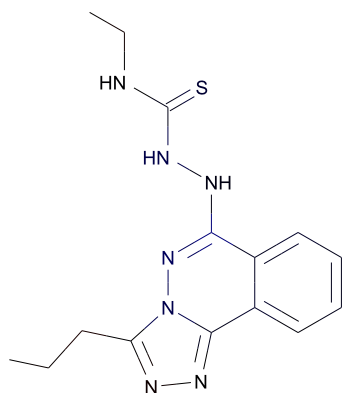C<sub>15</sub>H<sub>19</sub>N<sub>7</sub>S

Molecular Weight: 329.42325

ALogP: 3.388

Rotatable Bonds: 7

Acceptors: 5

Donors: 3

**Model Prediction**

Prediction: Mild

Probability: 0.734

Enrichment: 1.07

Bayesian Score: -2.85

Mahalanobis Distance: 7.55

Mahalanobis Distance p-value: 0.981

Prediction: Positive if the Bayesian score is above the estimated best cutoff value from minimizing the false positive and false negative rate.

Probability: The estimated probability that the sample is in the positive category. This assumes that the Bayesian score follows a normal distribution and is different from the prediction using a cutoff.

Enrichment: An estimate of enrichment, that is, the increased likelihood (versus random) of this sample being in the category.

Bayesian Score: The standard Laplacian-modified Bayesian score.

Mahalanobis Distance: The Mahalanobis distance (MD) is the distance to the center of the training data. The larger the MD, the less trustworthy the prediction.

Mahalanobis Distance p-value: The p-value gives the fraction of training data with an MD greater than or equal to the one for the given sample, assuming normally distributed data. The smaller the p-value, the less trustworthy the prediction. For highly non-normal X properties (e.g., fingerprints), the MD p-value is wildly inaccurate.

**Structural Similar Compounds**

| Name               | ANTHRAQUINONE; 1-((2-HYDROXYETHYL)AMINO)-4-(METHYLAMINO)- | METHANE;TRIS(4-AMINOPHENYL)- | 2-NAPHTHALENESULFONIC ACID; 4-HYDROXY-7-(METHYLAMINO)- |
|--------------------|-----------------------------------------------------------|------------------------------|--------------------------------------------------------|
| Structure          |                                                           |                              |                                                        |
| Actual Endpoint    | Mild                                                      | Moderate_Severe              | Mild                                                   |
| Predicted Endpoint | Mild                                                      | Moderate_Severe              | Mild                                                   |
| Distance           | 0.673                                                     | 0.737                        | 0.747                                                  |
| Reference          | 28ZPAK 245;72                                             | 28ZPAK-;73;72                | 28ZPAK 190;72                                          |

**Model Applicability**

Unknown features are fingerprint features in the query molecule, but not found or appearing too infrequently in the training set.

1. All properties and OPS components are within expected ranges.
2. Unknown FCFP\_2 feature: -1151884458: [\*]N[c](:n:[\*]):[c](:[\*]):[\*]
3. Unknown FCFP\_2 feature: -1564473960: [\*]:n1:[\*]:[\*]:n:[c]:1:[c](:[\*]):[\*]
4. Unknown FCFP\_2 feature: -885461129: [\*]NNC(=[\*])[\*]

**Feature Contribution****Top features for positive contribution**

| Fingerprint | Bit/Smiles  | Feature Structure | Score | Moderate_Severe in training set |
|-------------|-------------|-------------------|-------|---------------------------------|
| FCFP_10     | -1939253119 | <br>[*]C(=[*])NCC | 0.332 | 5 out of 5                      |

|                                               |                   |                                                                                                                                          |              |                                        |
|-----------------------------------------------|-------------------|------------------------------------------------------------------------------------------------------------------------------------------|--------------|----------------------------------------|
| FCFP_10                                       | -1539162406       | 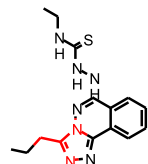<br><chem>[*]C[c]1:n:[*]:[*]:n:1:[*]</chem>           | 0.294        | 3 out of 3                             |
| FCFP_10                                       | -1272709286       | <br><chem>[*]NCC</chem>                               | 0.285        | 234 out of 266                         |
| <b>Top Features for negative contribution</b> |                   |                                                                                                                                          |              |                                        |
| <b>Fingerprint</b>                            | <b>Bit/Smiles</b> | <b>Feature Structure</b>                                                                                                                 | <b>Score</b> | <b>Moderate_Severe in training set</b> |
| FCFP_10                                       | 4427049           | <br><chem>[*][c](:[*]):n:n(:[*]):[*]</chem>           | -1.29        | 0 out of 4                             |
| FCFP_10                                       | -332197802        | <br><chem>[*][c]1:[*]:[*]:[c](:[*]):n:1:n:[*]</chem> | -0.507       | 0 out of 1                             |
| FCFP_10                                       | 1934560662        | <br><chem>[*]NC(=S)NCC</chem>                       | -0.507       | 0 out of 1                             |



8b

## TOPKAT\_Ocular\_Irritancy\_Mild\_vs\_Moderate\_Severe

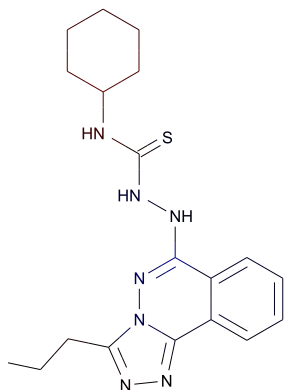C<sub>19</sub>H<sub>25</sub>N<sub>7</sub>S

Molecular Weight: 383.51369

ALogP: 4.898

Rotatable Bonds: 7

Acceptors: 5

Donors: 3

**Model Prediction**

Prediction: Mild

Probability: 0.79

Enrichment: 1.15

Bayesian Score: -1.36

Mahalanobis Distance: 10.2

Mahalanobis Distance p-value: 0.0543

Prediction: Positive if the Bayesian score is above the estimated best cutoff value from minimizing the false positive and false negative rate.

Probability: The estimated probability that the sample is in the positive category. This assumes that the Bayesian score follows a normal distribution and is different from the prediction using a cutoff.

Enrichment: An estimate of enrichment, that is, the increased likelihood (versus random) of this sample being in the category.

Bayesian Score: The standard Laplacian-modified Bayesian score.

Mahalanobis Distance: The Mahalanobis distance (MD) is the distance to the center of the training data. The larger the MD, the less trustworthy the prediction.

Mahalanobis Distance p-value: The p-value gives the fraction of training data with an MD greater than or equal to the one for the given sample, assuming normally distributed data. The smaller the p-value, the less trustworthy the prediction. For highly non-normal X properties (e.g., fingerprints), the MD p-value is wildly inaccurate.

**Structural Similar Compounds**

| Name               | 4;4'-DIAMINO-1;1'-DIANTHRIMIDE | ANTHRAQUINONE; 1-AMINO-4-HYDROXY-2-PHENOXY- | ANTHRAQUINONE; 1-((2-HYDROXYETHYL)AMINO)-4-(METHYLAMINO)- |
|--------------------|--------------------------------|---------------------------------------------|-----------------------------------------------------------|
| Structure          |                                |                                             |                                                           |
| Actual Endpoint    | Mild                           | Mild                                        | Mild                                                      |
| Predicted Endpoint | Mild                           | Mild                                        | Mild                                                      |
| Distance           | 0.764                          | 0.800                                       | 0.828                                                     |
| Reference          | 28ZPAK-;125;72                 | 28ZPAK 239;72                               | 28ZPAK 245;72                                             |

**Model Applicability**

Unknown features are fingerprint features in the query molecule, but not found or appearing too infrequently in the training set.

1. All properties and OPS components are within expected ranges.
2. Unknown FCFP\_2 feature: -1151884458: [\*]N[c](:n:[\*]):[c](:[\*]):[\*]
3. Unknown FCFP\_2 feature: -1564473960: [\*]:n1:[\*]:[\*]:n:[c]:1:[c](:[\*]):[\*]
4. Unknown FCFP\_2 feature: -885461129: [\*]NNC(=[\*])[\*]

**Feature Contribution****Top features for positive contribution**

| Fingerprint | Bit/Smiles | Feature Structure       | Score | Moderate_Severe in training set |
|-------------|------------|-------------------------|-------|---------------------------------|
| FCFP_10     | -796673622 | <br>[*]C(=*)NC1CC[*]CC1 | 0.317 | 4 out of 4                      |

|                                               |                   |                                                                                                                                           |              |                                        |
|-----------------------------------------------|-------------------|-------------------------------------------------------------------------------------------------------------------------------------------|--------------|----------------------------------------|
| FCFP_10                                       | -1539162406       | 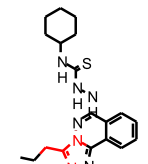<br><chem>[*]C[c]1:n:[*]:[*]:n:1:[*]</chem>            | 0.294        | 3 out of 3                             |
| FCFP_10                                       | 654530535         | <br><chem>[*]C(=[*])NC1CCCCC1</chem>                   | 0.294        | 3 out of 3                             |
| <b>Top Features for negative contribution</b> |                   |                                                                                                                                           |              |                                        |
| <b>Fingerprint</b>                            | <b>Bit/Smiles</b> | <b>Feature Structure</b>                                                                                                                  | <b>Score</b> | <b>Moderate_Severe in training set</b> |
| FCFP_10                                       | 4427049           | <br><chem>[*][c](:[*]):n:n(:[*]):[*]</chem>            | -1.29        | 0 out of 4                             |
| FCFP_10                                       | 1294344583        | <br><chem>[*]NN[c](:[*]):[*]</chem>                   | -0.507       | 0 out of 1                             |
| FCFP_10                                       | -332197802        | <br><chem>[*][c]1:[*]:[*]:[c](:[*]):n:1:n:[*]</chem> | -0.507       | 0 out of 1                             |

9a

## TOPKAT\_Ocular\_Irritancy\_Mild\_vs\_Moderate\_Severe

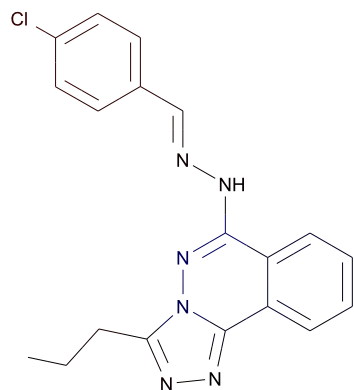C<sub>19</sub>H<sub>17</sub>ClN<sub>6</sub>

Molecular Weight: 364.83147

ALogP: 4.967

Rotatable Bonds: 5

Acceptors: 5

Donors: 1

**Model Prediction**

Prediction: Mild

Probability: 0.802

Enrichment: 1.16

Bayesian Score: -0.913

Mahalanobis Distance: 7.84

Mahalanobis Distance p-value: 0.951

Prediction: Positive if the Bayesian score is above the estimated best cutoff value from minimizing the false positive and false negative rate.

Probability: The estimated probability that the sample is in the positive category. This assumes that the Bayesian score follows a normal distribution and is different from the prediction using a cutoff.

Enrichment: An estimate of enrichment, that is, the increased likelihood (versus random) of this sample being in the category.

Bayesian Score: The standard Laplacian-modified Bayesian score.

Mahalanobis Distance: The Mahalanobis distance (MD) is the distance to the center of the training data. The larger the MD, the less trustworthy the prediction.

Mahalanobis Distance p-value: The p-value gives the fraction of training data with an MD greater than or equal to the one for the given sample, assuming normally distributed data. The smaller the p-value, the less trustworthy the prediction. For highly non-normal X properties (e.g., fingerprints), the MD p-value is wildly inaccurate.

**Structural Similar Compounds**

| Name               | 1-BENZOYLAMINO-4-METHOXY-5-CHLORANTHRAQUINONE | ANTHRAQUINONE; 1;1'-IMINODI- | BENZILIC ACID; 4;4'-DICHLORO-; ISOPROPYL ESTER |
|--------------------|-----------------------------------------------|------------------------------|------------------------------------------------|
| Structure          |                                               |                              |                                                |
| Actual Endpoint    | Mild                                          | Mild                         | Moderate_Severe                                |
| Predicted Endpoint | Mild                                          | Mild                         | Moderate_Severe                                |
| Distance           | 0.601                                         | 0.616                        | 0.637                                          |
| Reference          | 28ZPAK-;90;72                                 | 28ZPAK-;125;72               | CIGET* -;--;77                                 |

**Model Applicability**

Unknown features are fingerprint features in the query molecule, but not found or appearing too infrequently in the training set.

1. All properties and OPS components are within expected ranges.
2. Unknown FCFP\_2 feature: -1151884458: [\*]N[c](:n:[\*]):[c](:[\*]):[\*]
3. Unknown FCFP\_2 feature: -1564473960: [\*]:n1:[\*]:[\*]:n:[c]:1:[c](:[\*]):[\*]
4. Unknown FCFP\_2 feature: 1294285001: [\*]=NN[c](:[\*]):[\*]
5. Unknown FCFP\_2 feature: 581019816: [\*]N\N=C\[\*]

**Feature Contribution****Top features for positive contribution**

| Fingerprint | Bit/Smiles | Feature Structure                             | Score | Moderate_Severe in training set |
|-------------|------------|-----------------------------------------------|-------|---------------------------------|
| FCFP_10     | -149636017 | <br>[*]=C[c]1:[cH]:[cH]:[c]([Cl]):[cH]:[cH]:1 | 0.352 | 7 out of 7                      |

|                                               |                   |                                                                                                                                               |              |                                            |
|-----------------------------------------------|-------------------|-----------------------------------------------------------------------------------------------------------------------------------------------|--------------|--------------------------------------------|
| FCFP_10                                       | -1508180856       | 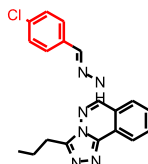<br>[*][c]1:[cH]:[cH]:[c]<br>(Cl):[cH]:[cH]:1              | 0.329        | 16 out of 17                               |
| FCFP_10                                       | -745491832        | <br>Cl[c]1:[cH]:[cH]:[*]:<br>[cH]:[cH]:1                   | 0.304        | 29 out of 32                               |
| <b>Top Features for negative contribution</b> |                   |                                                                                                                                               |              |                                            |
| <b>Fingerprint</b>                            | <b>Bit/Smiles</b> | <b>Feature Structure</b>                                                                                                                      | <b>Score</b> | <b>Moderate_Severe<br/>in training set</b> |
| FCFP_10                                       | 4427049           | <br>[*][c]:[*]:n:n(:[*]<br>):[*]                           | -1.29        | 0 out of 4                                 |
| FCFP_10                                       | -332197802        | <br>[*][c]1:[*]:[*]:[c]:<br>[*]:n:1:n:[*]                 | -0.507       | 0 out of 1                                 |
| FCFP_10                                       | -1320007763       | <br>[*][c]:[*]:[c]:[cH]<br>]:[cH]:[cH]:[*]:[c]:<br>1:[*] | -0.316       | 19 out of 40                               |



|                                               |                   |                                                                                                                                                  |              |                                        |
|-----------------------------------------------|-------------------|--------------------------------------------------------------------------------------------------------------------------------------------------|--------------|----------------------------------------|
| FCFP_10                                       | -1508180856       | 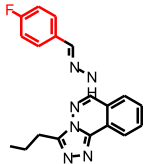<br>[*][c]1:[cH]:[cH]:[c]<br>(Cl):[cH]:[cH]:1                 | 0.329        | 16 out of 17                           |
| FCFP_10                                       | -745491832        | <br>Cl[c]1:[cH]:[cH]:[*]:<br>[cH]:[cH]:1                      | 0.304        | 29 out of 32                           |
| <b>Top Features for negative contribution</b> |                   |                                                                                                                                                  |              |                                        |
| <b>Fingerprint</b>                            | <b>Bit/Smiles</b> | <b>Feature Structure</b>                                                                                                                         | <b>Score</b> | <b>Moderate_Severe in training set</b> |
| FCFP_10                                       | 4427049           | <br>[*][c](:[*]):n:n(:[*]<br>):[*]                            | -1.29        | 0 out of 4                             |
| FCFP_10                                       | -332197802        | <br>[*][c]1:[*]:[*]:[c](:<br>[*]):n:1:n:[*]                  | -0.507       | 0 out of 1                             |
| FCFP_10                                       | -1320007763       | <br>[*][c](:[*]):[c]1:[cH]<br>]:[cH]:[cH]:[*]:[c]:<br>1:[*] | -0.316       | 19 out of 40                           |

9c

## TOPKAT\_Ocular\_Irritancy\_Mild\_vs\_Moderate\_Severe

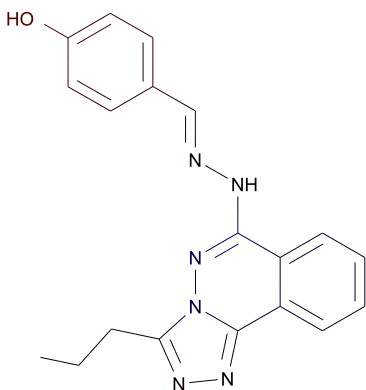C<sub>19</sub>H<sub>18</sub>N<sub>6</sub>O

Molecular Weight: 346.38582

ALogP: 4.061

Rotatable Bonds: 5

Acceptors: 6

Donors: 2

**Model Prediction**

Prediction: Mild

Probability: 0.811

Enrichment: 1.18

Bayesian Score: -0.525

Mahalanobis Distance: 8.13

Mahalanobis Distance p-value: 0.893

Prediction: Positive if the Bayesian score is above the estimated best cutoff value from minimizing the false positive and false negative rate.

Probability: The estimated probability that the sample is in the positive category. This assumes that the Bayesian score follows a normal distribution and is different from the prediction using a cutoff.

Enrichment: An estimate of enrichment, that is, the increased likelihood (versus random) of this sample being in the category.

Bayesian Score: The standard Laplacian-modified Bayesian score.

Mahalanobis Distance: The Mahalanobis distance (MD) is the distance to the center of the training data. The larger the MD, the less trustworthy the prediction.

Mahalanobis Distance p-value: The p-value gives the fraction of training data with an MD greater than or equal to the one for the given sample, assuming normally distributed data. The smaller the p-value, the less trustworthy the prediction. For highly non-normal X properties (e.g., fingerprints), the MD p-value is wildly inaccurate.

**Structural Similar Compounds**

| Name               | ANTHRAQUINONE; 1-AMINO-4-HYDROXY-2-PHENOXY- | s-TRIAZINE; 2;4-BIS(ISOPROPYLAMINO)-6-(METHYLTHIO)- | s-TRIAZINE; 2-(tert-BUTYLAMINO)-4-(ETHYLAMINO)-6-(METHYLTHIO)- |
|--------------------|---------------------------------------------|-----------------------------------------------------|----------------------------------------------------------------|
| Structure          |                                             |                                                     |                                                                |
| Actual Endpoint    | Mild                                        | Mild                                                | Moderate_Severe                                                |
| Predicted Endpoint | Mild                                        | Mild                                                | Moderate_Severe                                                |
| Distance           | 0.615                                       | 0.691                                               | 0.696                                                          |
| Reference          | 28ZPAK 239;72                               | CIGET* -;-;77                                       | CIGET* -;-;77                                                  |

**Model Applicability**

Unknown features are fingerprint features in the query molecule, but not found or appearing too infrequently in the training set.

1. All properties and OPS components are within expected ranges.
2. Unknown FCFP\_2 feature: -1151884458: [\*]N[c](:n:[\*]):[c](:[\*]):[\*]
3. Unknown FCFP\_2 feature: -1564473960: [\*]:n1:[\*]:[\*]:n:[c]:1:[c](:[\*]):[\*]
4. Unknown FCFP\_2 feature: 1294285001: [\*]=NN[c](:[\*]):[\*]
5. Unknown FCFP\_2 feature: 581019816: [\*]N\N=C[\*]

**Feature Contribution**

| Top features for positive contribution |             |                                              |       |                                 |
|----------------------------------------|-------------|----------------------------------------------|-------|---------------------------------|
| Fingerprint                            | Bit/Smiles  | Feature Structure                            | Score | Moderate_Severe in training set |
| FCFP_10                                | -1066794953 | <br>[*][c]1:[cH]:[cH]:[c]<br>(O):[cH]:[cH]:1 | 0.378 | 13 out of 13                    |

|                                               |                   |                                                                                                                                                      |              |                                        |
|-----------------------------------------------|-------------------|------------------------------------------------------------------------------------------------------------------------------------------------------|--------------|----------------------------------------|
| FCFP_10                                       | -158888774        | 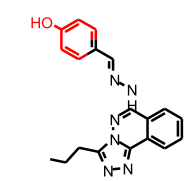<br><chem>O[c]1:[cH]:[cH]:[*]:[cH]:[cH]:1</chem>                   | 0.356        | 24 out of 25                           |
| FCFP_10                                       | -1539162406       | <br><chem>[*]C[c]1:n:[*]:[*]:n:1:[*]</chem>                       | 0.294        | 3 out of 3                             |
| <b>Top Features for negative contribution</b> |                   |                                                                                                                                                      |              |                                        |
| <b>Fingerprint</b>                            | <b>Bit/Smiles</b> | <b>Feature Structure</b>                                                                                                                             | <b>Score</b> | <b>Moderate_Severe in training set</b> |
| FCFP_10                                       | 4427049           | <br><chem>[*][c](:[*]):n:n(:[*]):[*]</chem>                       | -1.29        | 0 out of 4                             |
| FCFP_10                                       | -332197802        | <br><chem>[*][c]1:[*]:[*]:[c](:[*]):n:1:n:[*]</chem>             | -0.507       | 0 out of 1                             |
| FCFP_10                                       | -1320007763       | <br><chem>[*][c](:[*]):[c]1:[cH]:[cH]:[cH]:[*]:[c]:1:[*]</chem> | -0.316       | 19 out of 40                           |



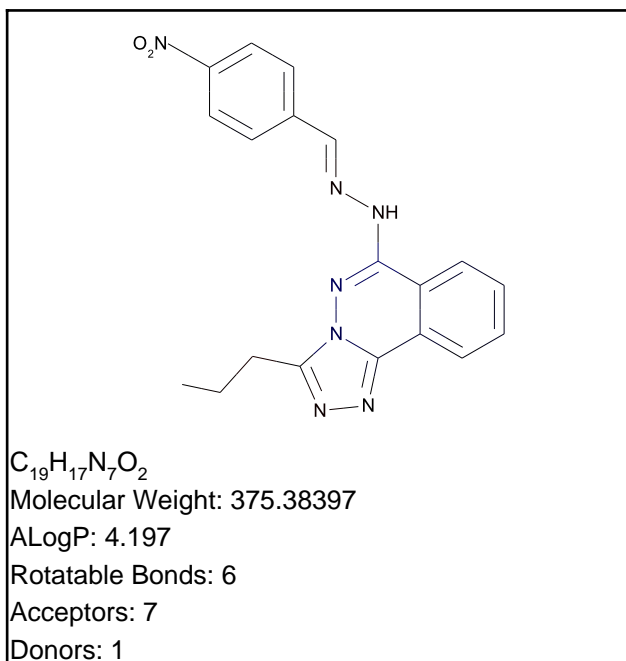

### Model Prediction

Prediction: Mild

Probability: 0.772

Enrichment: 1.12

Bayesian Score: -1.94

Mahalanobis Distance: 7.74

Mahalanobis Distance p-value: 0.965

Prediction: Positive if the Bayesian score is above the estimated best cutoff value from minimizing the false positive and false negative rate.

Probability: The estimated probability that the sample is in the positive category. This assumes that the Bayesian score follows a normal distribution and is different from the prediction using a cutoff.

Enrichment: An estimate of enrichment, that is, the increased likelihood (versus random) of this sample being in the category.

Bayesian Score: The standard Laplacian-modified Bayesian score.

Mahalanobis Distance: The Mahalanobis distance (MD) is the distance to the center of the training data. The larger the MD, the less trustworthy the prediction.

Mahalanobis Distance p-value: The p-value gives the fraction of training data with an MD greater than or equal to the one for the given sample, assuming normally distributed data. The smaller the p-value, the less trustworthy the prediction. For highly non-normal X properties (e.g., fingerprints), the MD p-value is wildly inaccurate.

### Structural Similar Compounds

| Name               | COLCHICINE                                                                          | 1;4-PENTADIENE-3-ONE;1;5-BIS(4-(2;3-DIDEHYDROTRIAZIRIDINYL)PHENYL)-                 | ANTHRAQUINONE; 1;1'-IMINODI-                                                        |
|--------------------|-------------------------------------------------------------------------------------|-------------------------------------------------------------------------------------|-------------------------------------------------------------------------------------|
| Structure          | 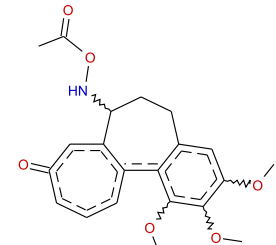 |  |  |
| Actual Endpoint    | Moderate_Severe                                                                     | Mild                                                                                | Mild                                                                                |
| Predicted Endpoint | Moderate_Severe                                                                     | Mild                                                                                | Mild                                                                                |
| Distance           | 0.709                                                                               | 0.741                                                                               | 0.766                                                                               |
| Reference          | AJOPAA 31;837;48                                                                    | 28ZPAK-;123;72                                                                      | 28ZPAK-;125;72                                                                      |

### Model Applicability

Unknown features are fingerprint features in the query molecule, but not found or appearing too infrequently in the training set.

- All properties and OPS components are within expected ranges.
- Unknown FCFP\_2 feature: -1151884458: [\*]N[c](:n:[\*]):[c](:[\*]):[\*]
- Unknown FCFP\_2 feature: -1564473960: [\*]:n1:[\*]:[\*]:n:[c]:1:[c](:[\*]):[\*]
- Unknown FCFP\_2 feature: 1294285001: [\*]=NN[c](:[\*]):[\*]
- Unknown FCFP\_2 feature: 581019816: [\*]N\N=C\[\*]
- Unknown FCFP\_2 feature: -828984032: [\*][N+](=[\*])[c](:[cH]:[\*]):[cH]:[\*]
- Unknown FCFP\_2 feature: -1338588315: [\*]:[c](:[\*])[N+](=O)[O-]
- Unknown FCFP\_2 feature: 1872392852: [\*][N+](=O)[\*]
- Unknown FCFP\_2 feature: 260476081: [\*][N+](=[\*])[O-]

### Feature Contribution

#### Top features for positive contribution

| Fingerprint | Bit/Smiles | Feature Structure | Score | Moderate_Severe in training set |
|-------------|------------|-------------------|-------|---------------------------------|
|             |            |                   |       |                                 |

|                                               |                   |                                                                                                                                           |              |                                        |
|-----------------------------------------------|-------------------|-------------------------------------------------------------------------------------------------------------------------------------------|--------------|----------------------------------------|
| FCFP_10                                       | -1539162406       | 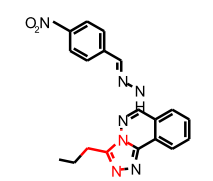<br><chem>[*]C[c]1:n:[*]:[*]:n:1:[*]</chem>             | 0.294        | 3 out of 3                             |
| FCFP_10                                       | -2100785893       | <br><chem>[*]N=C[c](:[*]):[*]</chem>                   | 0.256        | 2 out of 2                             |
| FCFP_10                                       | 3                 | <br><chem>[*]N[*]</chem>                               | 0.165        | 383 out of 491                         |
| <b>Top Features for negative contribution</b> |                   |                                                                                                                                           |              |                                        |
| <b>Fingerprint</b>                            | <b>Bit/Smiles</b> | <b>Feature Structure</b>                                                                                                                  | <b>Score</b> | <b>Moderate_Severe in training set</b> |
| FCFP_10                                       | 4427049           | <br><chem>[*][c](:[*]):n(n:[*]):[*]</chem>            | -1.29        | 0 out of 4                             |
| FCFP_10                                       | -332197802        | <br><chem>[*][c]1:[*]:[*]:[c](:[*]):n:1:n:[*]</chem> | -0.507       | 0 out of 1                             |

|         |            |                                                                                                                                                                                  |        |              |
|---------|------------|----------------------------------------------------------------------------------------------------------------------------------------------------------------------------------|--------|--------------|
| FCFP_10 | 1320007763 | 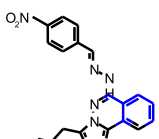 <p data-bbox="1260 243 1438 332">[*][c](:[*]):[c]*[cH<br/>]:[cH]:[cH]:[*]:[c]:<br/>1:[*]</p> | -0.316 | 19 out of 40 |
|---------|------------|----------------------------------------------------------------------------------------------------------------------------------------------------------------------------------|--------|--------------|

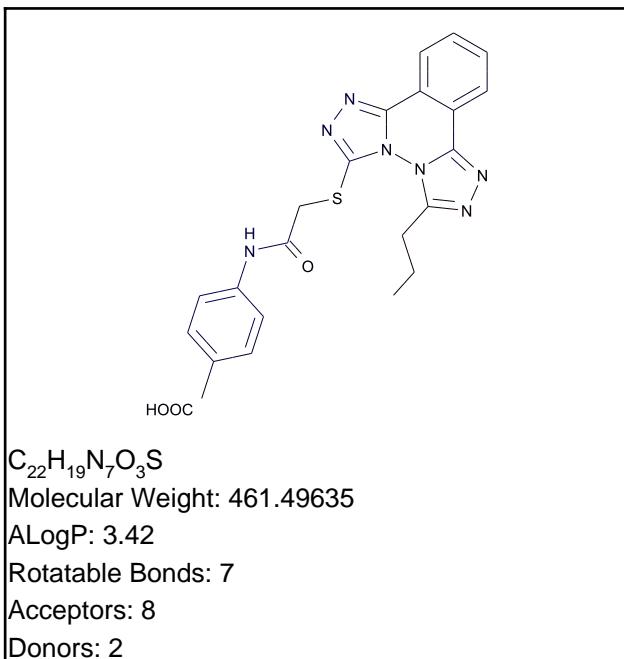

### Model Prediction

Prediction: Mild

Probability: 0.715

Enrichment: 1.04

Bayesian Score: -3.24

Mahalanobis Distance: 12.2

Mahalanobis Distance p-value: 2.02e-005

Prediction: Positive if the Bayesian score is above the estimated best cutoff value from minimizing the false positive and false negative rate.

Probability: The estimated probability that the sample is in the positive category. This assumes that the Bayesian score follows a normal distribution and is different from the prediction using a cutoff.

Enrichment: An estimate of enrichment, that is, the increased likelihood (versus random) of this sample being in the category.

Bayesian Score: The standard Laplacian-modified Bayesian score.

Mahalanobis Distance: The Mahalanobis distance (MD) is the distance to the center of the training data. The larger the MD, the less trustworthy the prediction.

Mahalanobis Distance p-value: The p-value gives the fraction of training data with an MD greater than or equal to the one for the given sample, assuming normally distributed data. The smaller the p-value, the less trustworthy the prediction. For highly non-normal X properties (e.g., fingerprints), the MD p-value is wildly inaccurate.

### Structural Similar Compounds

| Name               | 4;4'-DIAMINO-1;1'-DIANTHRIMIDE | COLCHICINE       | 2;7-NAPHTHALENE DISULFONIC ACID;4-AMINO-5-HYDROXY-;P-TOLUENE SULFONATE (ESTER) |
|--------------------|--------------------------------|------------------|--------------------------------------------------------------------------------|
| Structure          |                                |                  |                                                                                |
| Actual Endpoint    | Mild                           | Moderate_Severe  | Moderate_Severe                                                                |
| Predicted Endpoint | Mild                           | Moderate_Severe  | Moderate_Severe                                                                |
| Distance           | 0.753                          | 0.829            | 0.852                                                                          |
| Reference          | 28ZPAK-;125;72                 | AJOPAA 31;837;48 | 28ZPAK-;194;72                                                                 |

### Model Applicability

Unknown features are fingerprint features in the query molecule, but not found or appearing too infrequently in the training set.

- All properties and OPS components are within expected ranges.
- Unknown FCFP\_2 feature: -1564473960: [\*]:n1:[\*]:[\*]:n:[c]:1:[c](:[\*]):[\*]

### Feature Contribution

#### Top features for positive contribution

| Fingerprint | Bit/Smiles | Feature Structure | Score | Moderate_Severe in training set |
|-------------|------------|-------------------|-------|---------------------------------|
| FCFP_10     | -548632217 |                   | 0.319 | 54 out of 59                    |

|                                               |                   |                                                                                                                                                              |              |                                        |
|-----------------------------------------------|-------------------|--------------------------------------------------------------------------------------------------------------------------------------------------------------|--------------|----------------------------------------|
| FCFP_10                                       | -1539162406       | 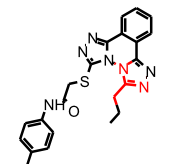<br><chem>[*]C([c]1[nH]n1):n:1:[*]</chem>                                 | 0.294        | 3 out of 3                             |
| FCFP_10                                       | 7                 | <br><chem>[*]O</chem>                                                     | 0.219        | 117 out of 142                         |
| <b>Top Features for negative contribution</b> |                   |                                                                                                                                                              |              |                                        |
| <b>Fingerprint</b>                            | <b>Bit/Smiles</b> | <b>Feature Structure</b>                                                                                                                                     | <b>Score</b> | <b>Moderate_Severe in training set</b> |
| FCFP_10                                       | 4427049           | <br><chem>[*][c]1[nH]n1:n([*]):[*]</chem>                                 | -1.29        | 0 out of 4                             |
| FCFP_10                                       | -332197802        | <br><chem>[*][c]1[nH]n1:[c]([*]):n:1:n:[*]</chem>                        | -0.507       | 0 out of 1                             |
| FCFP_10                                       | -790336137        | <br><chem>[*]C(=[*])N1[nH]1:[cH]:[cH]:[c]([cH]):[cH]:1C(=[*])[*]</chem> | -0.507       | 0 out of 1                             |

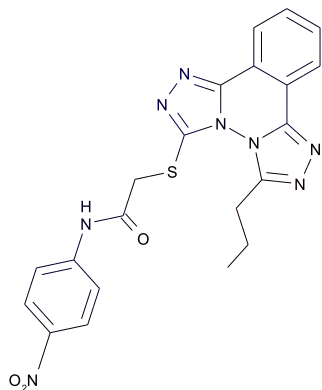

$C_{21}H_{18}N_8O_3S$

Molecular Weight: 462.48441

ALogP: 3.685

Rotatable Bonds: 7

Acceptors: 8

Donors: 1

## Model Prediction

Prediction: Mild

Probability: 0.726

Enrichment: 1.05

Bayesian Score: -3.03

Mahalanobis Distance: 8.28

Mahalanobis Distance p-value: 0.85

Prediction: Positive if the Bayesian score is above the estimated best cutoff value from minimizing the false positive and false negative rate.

Probability: The estimated probability that the sample is in the positive category. This assumes that the Bayesian score follows a normal distribution and is different from the prediction using a cutoff.

Enrichment: An estimate of enrichment, that is, the increased likelihood (versus random) of this sample being in the category.

Bayesian Score: The standard Laplacian-modified Bayesian score.

Mahalanobis Distance: The Mahalanobis distance (MD) is the distance to the center of the training data. The larger the MD, the less trustworthy the prediction.

Mahalanobis Distance p-value: The p-value gives the fraction of training data with an MD greater than or equal to the one for the given sample, assuming normally distributed data. The smaller the p-value, the less trustworthy the prediction. For highly non-normal X properties (e.g., fingerprints), the MD p-value is wildly inaccurate.

## Structural Similar Compounds

| Name               | COLCHICINE       | 1;8;9-ANTHRACENETRIOL; TRIACETATE | 1;4-PENTADIENE-3-ONE;1;5-BIS(4-(2;3-DIDEHYDROTRIAZIRIDINY L)PHENYL)- |
|--------------------|------------------|-----------------------------------|----------------------------------------------------------------------|
| Structure          |                  |                                   |                                                                      |
| Actual Endpoint    | Moderate_Severe  | Moderate_Severe                   | Mild                                                                 |
| Predicted Endpoint | Moderate_Severe  | Moderate_Severe                   | Mild                                                                 |
| Distance           | 0.780            | 0.872                             | 0.881                                                                |
| Reference          | AJOPAA 31;837;48 | BJOPAL 53;819;69                  | 28ZPAK-;123;72                                                       |

## Model Applicability

Unknown features are fingerprint features in the query molecule, but not found or appearing too infrequently in the training set.

1. All properties and OPS components are within expected ranges.
2. Unknown FCFP\_2 feature: -1564473960: [\*]:n1:[\*]:[\*]:n:[c]:1:[c](:[\*]):[\*]
3. Unknown FCFP\_2 feature: -828984032: [\*][N+](=[\*])[c](:[cH]:[\*]):[cH]:[\*]
4. Unknown FCFP\_2 feature: -1338588315: [\*]:[c](:[\*])[N+](=O)[O-]
5. Unknown FCFP\_2 feature: 1872392852: [\*][N+](=O)[\*]
6. Unknown FCFP\_2 feature: 260476081: [\*][N+](=[\*])[O-]

## Feature Contribution

### Top features for positive contribution

| Fingerprint | Bit/Smiles | Feature Structure | Score | Moderate_Severe in training set |
|-------------|------------|-------------------|-------|---------------------------------|
|-------------|------------|-------------------|-------|---------------------------------|

|         |             |                                                                                                                      |       |                |
|---------|-------------|----------------------------------------------------------------------------------------------------------------------|-------|----------------|
| FCFP_10 | -1539162406 | 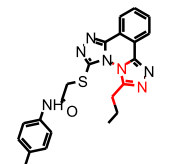<br>[*]C[*]:n:[*]:[*]:n:<br>1:[*] | 0.294 | 3 out of 3     |
| FCFP_10 | 3           | <br>[*]N[*]                       | 0.165 | 383 out of 491 |
| FCFP_10 | 907007053   | <br>[*]CC[*]:[*]:[*]              | 0.138 | 32 out of 42   |

**Top Features for negative contribution**

| Fingerprint | Bit/Smiles | Feature Structure                                                                                                              | Score  | Moderate_Severe in training set |
|-------------|------------|--------------------------------------------------------------------------------------------------------------------------------|--------|---------------------------------|
| FCFP_10     | 4427049    | 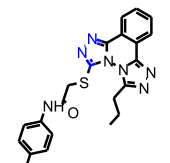<br>[*][c]([*]):n:n([*])<br>):[*]          | -1.29  | 0 out of 4                      |
| FCFP_10     | -332197802 | <br>[*][c]([*]):[*]:c([*])<br>):n:1:n:[*] | -0.507 | 0 out of 1                      |

|         |             |                                                                                                                                                                                   |        |              |
|---------|-------------|-----------------------------------------------------------------------------------------------------------------------------------------------------------------------------------|--------|--------------|
| FCFP_10 | -1320007763 | 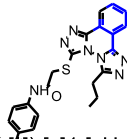 <p data-bbox="1260 243 1428 332">[*][c](:[*]):[c]1:[cH]<br/>:[cH]:[cH]:[*]:[c]:<br/>1:[*]</p> | -0.316 | 19 out of 40 |
|---------|-------------|-----------------------------------------------------------------------------------------------------------------------------------------------------------------------------------|--------|--------------|



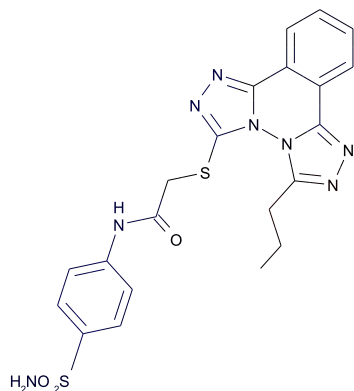

$C_{21}H_{20}N_8O_3S_2$   
 Molecular Weight: 496.56529  
 ALogP: 2.496  
 Rotatable Bonds: 7  
 Acceptors: 8  
 Donors: 2

### Model Prediction

Prediction: Mild

Probability: 0.659

Enrichment: 0.956

Bayesian Score: -4.2

Mahalanobis Distance: 8.56

Mahalanobis Distance p-value: 0.737

Prediction: Positive if the Bayesian score is above the estimated best cutoff value from minimizing the false positive and false negative rate.

Probability: The estimated probability that the sample is in the positive category. This assumes that the Bayesian score follows a normal distribution and is different from the prediction using a cutoff.

Enrichment: An estimate of enrichment, that is, the increased likelihood (versus random) of this sample being in the category.

Bayesian Score: The standard Laplacian-modified Bayesian score.

Mahalanobis Distance: The Mahalanobis distance (MD) is the distance to the center of the training data. The larger the MD, the less trustworthy the prediction.

Mahalanobis Distance p-value: The p-value gives the fraction of training data with an MD greater than or equal to the one for the given sample, assuming normally distributed data. The smaller the p-value, the less trustworthy the prediction. For highly non-normal X properties (e.g., fingerprints), the MD p-value is wildly inaccurate.

### Structural Similar Compounds

| Name               | 2:2'-Stilbenedisulfonic acid; 4;4'-dinitro-                             | 2:7-NAPHTHALENE DISULFONIC ACID;4-AMINO-5-HYDROXY-;P-TOLUENE SULFONATE (ESTER) | 4;4'-DIAMINO-1;1'-DIANTHRIMIDE |
|--------------------|-------------------------------------------------------------------------|--------------------------------------------------------------------------------|--------------------------------|
| Structure          |                                                                         |                                                                                |                                |
| Actual Endpoint    | Mild                                                                    | Moderate_Severe                                                                | Mild                           |
| Predicted Endpoint | Mild                                                                    | Moderate_Severe                                                                | Mild                           |
| Distance           | 0.783                                                                   | 0.787                                                                          | 0.803                          |
| Reference          | Prehled Prumyslove Toxikologie; Organicke Latky; Marhold; J. pp 1062;86 | 28ZPAK-;194;72                                                                 | 28ZPAK-;125;72                 |

### Model Applicability

Unknown features are fingerprint features in the query molecule, but not found or appearing too infrequently in the training set.

- All properties and OPS components are within expected ranges.
- Unknown FCFP\_2 feature: -1564473960: [\*]:n1:[\*]:[\*]:n:[c]:1:[c](:[\*]):[\*]

### Feature Contribution

| Top features for positive contribution |             |                                |       |                                 |
|----------------------------------------|-------------|--------------------------------|-------|---------------------------------|
| Fingerprint                            | Bit/Smiles  | Feature Structure              | Score | Moderate_Severe in training set |
| FCFP_10                                | -1539162406 | <br>[*]C[*]1:n:[*]:[*]:n:1:[*] | 0.294 | 3 out of 3                      |

|                                               |                   |                                                                                                                                                               |              |                                        |
|-----------------------------------------------|-------------------|---------------------------------------------------------------------------------------------------------------------------------------------------------------|--------------|----------------------------------------|
| FCFP_10                                       | 1070061035        | 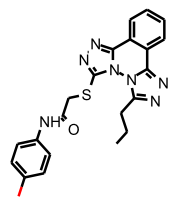<br><chem>[*]S(=[*])(=[*])N</chem>                                          | 0.239        | 284 out of 338                         |
| FCFP_10                                       | 1763397430        | <br><chem>[*]N[c]:[cH]:[cH]:[c]l:[cH]:[cH]:1S(=O)(=O)N</chem>              | 0.186        | 1 out of 1                             |
| <b>Top Features for negative contribution</b> |                   |                                                                                                                                                               |              |                                        |
| <b>Fingerprint</b>                            | <b>Bit/Smiles</b> | <b>Feature Structure</b>                                                                                                                                      | <b>Score</b> | <b>Moderate_Severe in training set</b> |
| FCFP_10                                       | 4427049           | <br><chem>[*][c](:[*]):n:n(:[*]):[*]</chem>                                | -1.29        | 0 out of 4                             |
| FCFP_10                                       | -332197802        | <br><chem>[*]N[c]:[*]:[*]:[c](:[*]):n:1:n:[*]</chem>                      | -0.507       | 0 out of 1                             |
| FCFP_10                                       | -790336137        | <br><chem>[*]C(=[*])N[c]:[cH]:[cH]:[c](:[*]):n:1:n:[*]1C(=[*])[*]</chem> | -0.507       | 0 out of 1                             |

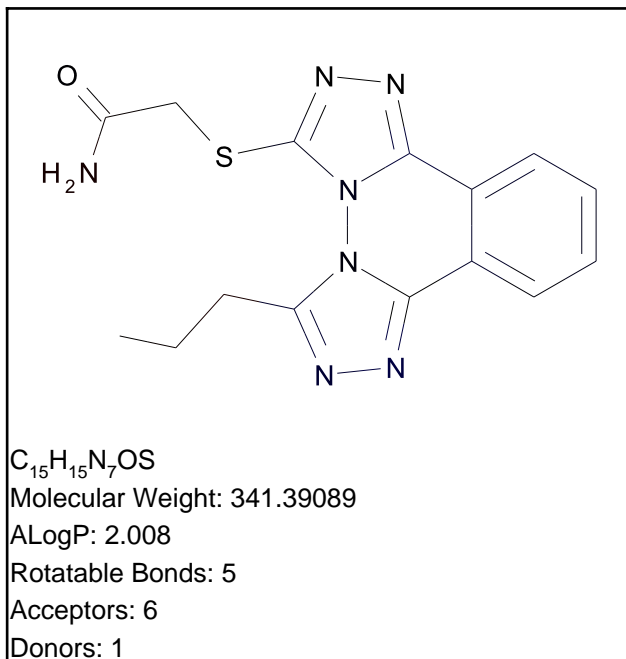

### Model Prediction

Prediction: Mild

Probability: 0.777

Enrichment: 1.13

Bayesian Score: -1.78

Mahalanobis Distance: 7.91

Mahalanobis Distance p-value: 0.941

Prediction: Positive if the Bayesian score is above the estimated best cutoff value from minimizing the false positive and false negative rate.

Probability: The estimated probability that the sample is in the positive category. This assumes that the Bayesian score follows a normal distribution and is different from the prediction using a cutoff.

Enrichment: An estimate of enrichment, that is, the increased likelihood (versus random) of this sample being in the category. Bayesian Score: The standard Laplacian-modified Bayesian score.

Mahalanobis Distance: The Mahalanobis distance (MD) is the distance to the center of the training data. The larger the MD, the less trustworthy the prediction.

Mahalanobis Distance p-value: The p-value gives the fraction of training data with an MD greater than or equal to the one for the given sample, assuming normally distributed data. The smaller the p-value, the less trustworthy the prediction. For highly non-normal X properties (e.g., fingerprints), the MD p-value is wildly inaccurate.

### Structural Similar Compounds

| Name               | 2,5-DICHLORO-4(3'-METHYL-5' PYRAZOLON-1'-YL)BENZENE SULFONIC ACID | Benzenesulfonic acid; 3,5-bis(methoxycarbonyl)-; sodium salt            | Benzenesulfonic acid; 2-anilino-5-nitro-                                |
|--------------------|-------------------------------------------------------------------|-------------------------------------------------------------------------|-------------------------------------------------------------------------|
| Structure          |                                                                   |                                                                         |                                                                         |
| Actual Endpoint    | Mild                                                              | Moderate_Severe                                                         | Moderate_Severe                                                         |
| Predicted Endpoint | Mild                                                              | Mild                                                                    | Mild                                                                    |
| Distance           | 0.607                                                             | 0.662                                                                   | 0.678                                                                   |
| Reference          | 28ZPAK-;186;72                                                    | Prehled Prumyslove Toxikologie; Organicke Latky; Marhold; J. - ;1059;86 | Prehled Prumyslove Toxikologie; Organicke Latky; Marhold; J. - ;1061;86 |

### Model Applicability

Unknown features are fingerprint features in the query molecule, but not found or appearing too infrequently in the training set.

- All properties and OPS components are within expected ranges.
- Unknown FCFP\_2 feature: -1564473960: [\*]:n1:[\*]:[\*]:n:[c]:1:[c](:[\*]):[\*]

### Feature Contribution

#### Top features for positive contribution

| Fingerprint | Bit/Smiles  | Feature Structure                           | Score | Moderate_Severe in training set |
|-------------|-------------|---------------------------------------------|-------|---------------------------------|
| FCFP_10     | -1539162406 | <br><chem>[*]C[c]1:n:[*]:[*]:n:1:[*]</chem> | 0.294 | 3 out of 3                      |

|                                               |                   |                                                                                                                             |              |                                            |
|-----------------------------------------------|-------------------|-----------------------------------------------------------------------------------------------------------------------------|--------------|--------------------------------------------|
| FCFP_10                                       | 1070061035        | 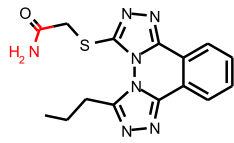<br><chem>[*]S(=[*])(=[*])N</chem>       | 0.239        | 284 out of 338                             |
| FCFP_10                                       | 3                 | <br><chem>[*]N[*]</chem>                 | 0.165        | 383 out of 491                             |
| <b>Top Features for negative contribution</b> |                   |                                                                                                                             |              |                                            |
| <b>Fingerprint</b>                            | <b>Bit/Smiles</b> | <b>Feature Structure</b>                                                                                                    | <b>Score</b> | <b>Moderate_Severe<br/>in training set</b> |
| FCFP_10                                       | 4427049           | <br><chem>[*][c](:[*]):n:n(:[*])</chem>  | -1.29        | 0 out of 4                                 |
| FCFP_10                                       | -332197802        | <br><chem>[*][c]1:[*]:[*]:[c](</chem>   | -0.507       | 0 out of 1                                 |
| FCFP_10                                       | -1320007763       | <br><chem>[*][c](:[*]):[c]1:[cH</chem> | -0.316       | 19 out of 40                               |

# Doxorubicin

# TOPKAT\_Ocular\_Irritancy\_Mild\_vs\_Moderate\_Severe

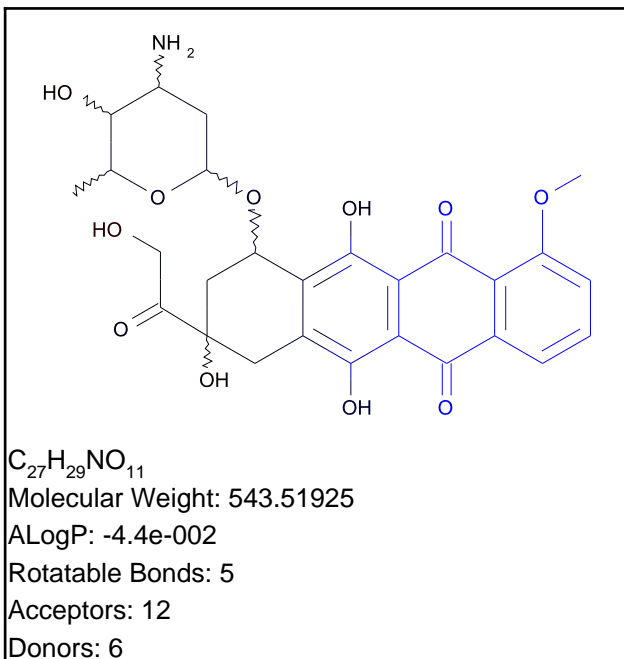

## Structural Similar Compounds

| Name               | Methanol; (s-triazine-2;4;6-triyltrinitrilo)hexa-                                   | 2-Naphthalenesulfonic acid; 5,6'-iminobis(1-hydroxy-                                | 1;3;6-NAPHTHALENE TRISULFONIC ACID;7-AMINO-                                         |
|--------------------|-------------------------------------------------------------------------------------|-------------------------------------------------------------------------------------|-------------------------------------------------------------------------------------|
| Structure          | 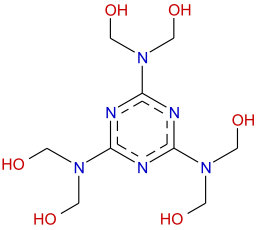 |  |  |
| Actual Endpoint    | Moderate_Severe                                                                     | Mild                                                                                | Mild                                                                                |
| Predicted Endpoint | Moderate_Severe                                                                     | Mild                                                                                | Mild                                                                                |
| Distance           | 0.947                                                                               | 0.991                                                                               | 1.168                                                                               |
| Reference          | Prehled Prumyslove Toxikologie; Organicke Latky; Marhold; J. -;876;86               | Prehled Prumyslove Toxikologie; Organicke Latky; Marhold; J. pp 1065;86             | 28ZPAK-;190;72                                                                      |

## Model Prediction

Prediction: Mild

Probability: 0.00731

Enrichment: 0.0106

Bayesian Score: -15

Mahalanobis Distance: 16.1

Mahalanobis Distance p-value: 1.56e-017

Prediction: Positive if the Bayesian score is above the estimated best cutoff value from minimizing the false positive and false negative rate.

Probability: The estimated probability that the sample is in the positive category. This assumes that the Bayesian score follows a normal distribution and is different from the prediction using a cutoff.

Enrichment: An estimate of enrichment, that is, the increased likelihood (versus random) of this sample being in the category. Bayesian Score: The standard Laplacian-modified Bayesian score.

Mahalanobis Distance: The Mahalanobis distance (MD) is the distance to the center of the training data. The larger the MD, the less trustworthy the prediction.

Mahalanobis Distance p-value: The p-value gives the fraction of training data with an MD greater than or equal to the one for the given sample, assuming normally distributed data. The smaller the p-value, the less trustworthy the prediction. For highly non-normal X properties (e.g., fingerprints), the MD p-value is wildly inaccurate.

## Model Applicability

Unknown features are fingerprint features in the query molecule, but not found or appearing too infrequently in the training set.

- OPS PC18 out of range. Value: -4.3032. Training min, max, SD, explained variance: -4.1566, 3.8733, 1.069, 0.0139.
- OPS PC20 out of range. Value: -3.1531. Training min, max, SD, explained variance: -3.1297, 4.2414, 1.03, 0.0129.

## Feature Contribution

### Top features for positive contribution

| Fingerprint | Bit/Smiles | Feature Structure | Score | Moderate Severe in training set |
|-------------|------------|-------------------|-------|---------------------------------|
|             |            |                   |       |                                 |

|                                               |                   |                                                                                                                                                                                                                                                        |              |                                            |
|-----------------------------------------------|-------------------|--------------------------------------------------------------------------------------------------------------------------------------------------------------------------------------------------------------------------------------------------------|--------------|--------------------------------------------|
| FCFP_10                                       | -1601875224       | 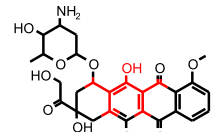<br><chem>[*]C([*])[c]1:[c]([*])</chem><br><chem>):[*]:[c]([*]):[c](C</chem><br><chem>(=[*])[*]):[c]:1O</chem>                                                      | 0.352        | 7 out of 7                                 |
| FCFP_10                                       | -1272709286       | <br><chem>[*]NCC</chem>                                                                                                                                             | 0.285        | 234 out of 266                             |
| FCFP_10                                       | 1070061035        | <br><chem>[*]S(=[*])(=[*])N</chem>                                                                                                                                  | 0.239        | 284 out of 338                             |
| <b>Top Features for negative contribution</b> |                   |                                                                                                                                                                                                                                                        |              |                                            |
| <b>Fingerprint</b>                            | <b>Bit/Smiles</b> | <b>Feature Structure</b>                                                                                                                                                                                                                               | <b>Score</b> | <b>Moderate_Severe<br/>in training set</b> |
| FCFP_10                                       | 979221427         | <br><chem>[*][c]1:[*]([*])</chem><br><chem>[c]2C(=[*])[c]3:[c](</chem><br><chem>[*]):[*]:[cH]:[cH]:[</chem><br><chem>c]:3C(=O)[c]:2:[c]:1</chem><br><chem>O</chem> | -1.6         | 0 out of 6                                 |
| FCFP_10                                       | -22686407         | <br><chem>[*][c](:[*]):[c]1C(=O)</chem><br><chem>)c(:[c]([*]):[*]):</chem><br><chem>[c](:[*])[*][c]:1[*</chem><br><chem>]</chem>                                  | -1.5         | 7 out of 53                                |

|         |             |                                                                                                                                                               |      |             |
|---------|-------------|---------------------------------------------------------------------------------------------------------------------------------------------------------------|------|-------------|
| FCFP_10 | -1549669478 | 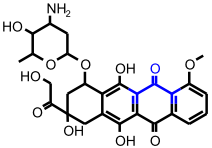 <p data-bbox="1266 280 1413 329">[*]:[c](:[*])C(=O)[c]<br/>(:[*]):[*]</p> | -1.5 | 7 out of 53 |
|---------|-------------|---------------------------------------------------------------------------------------------------------------------------------------------------------------|------|-------------|

7a

TOPKAT\_Ocular\_Irritancy\_None\_vs\_Irritant

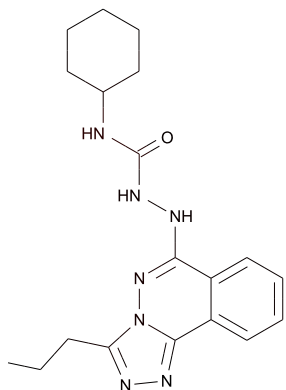C<sub>19</sub>H<sub>25</sub>N<sub>7</sub>O

Molecular Weight: 367.44809

ALogP: 3.681

Rotatable Bonds: 5

Acceptors: 5

Donors: 3

## Model Prediction

**Prediction:** Irritant

Probability: 1

Enrichment: 1.18

Bayesian Score: 1.39

Mahalanobis Distance: 9.4

Mahalanobis Distance p-value: 0.302

Prediction: Positive if the Bayesian score is above the estimated best cutoff value from minimizing the false positive and false negative rate.

Probability: The estimated probability that the sample is in the positive category. This assumes that the Bayesian score follows a normal distribution and is different from the prediction using a cutoff.

Enrichment: An estimate of enrichment, that is, the increased likelihood (versus random) of this sample being in the category.

Bayesian Score: The standard Laplacian-modified Bayesian score.

Mahalanobis Distance: The Mahalanobis distance (MD) is the distance to the center of the training data. The larger the MD, the less trustworthy the prediction.

Mahalanobis Distance p-value: The p-value gives the fraction of training data with an MD greater than or equal to the one for the given sample, assuming normally distributed data. The smaller the p-value, the less trustworthy the prediction. For highly non-normal X properties (e.g., fingerprints), the MD p-value is wildly inaccurate.

## Structural Similar Compounds

| Name               | Disperse Black 9                    | ANTHRAQUINONE; 1-((2-HYDROXYETHYL)AMINO)-4-(METHYLAMINO)- | METHANE;TRIS(4-AMINOPHENYL)- |
|--------------------|-------------------------------------|-----------------------------------------------------------|------------------------------|
| Structure          |                                     |                                                           |                              |
| Actual Endpoint    | Non-Irritant                        | Irritant                                                  | Irritant                     |
| Predicted Endpoint | Non-Irritant                        | Irritant                                                  | Irritant                     |
| Distance           | 0.668                               | 0.673                                                     | 0.720                        |
| Reference          | J. Am. Coll. Toxicol. 5(3):205;1986 | 28ZPAK 245;72                                             | 28ZPAK-;73;72                |

## Model Applicability

Unknown features are fingerprint features in the query molecule, but not found or appearing too infrequently in the training set.

1. All properties and OPS components are within expected ranges.
2. Unknown FCFP\_2 feature: -1151884458: [\*]N[c](:n:[\*]):[c](:[\*]):[\*]
3. Unknown FCFP\_2 feature: -1564473960: [\*]:n1:[\*]:[\*]:n:[c]:1:[c](:[\*]):[\*]
4. Unknown FCFP\_2 feature: -885461129: [\*]NNC(=[\*])[\*]

## Feature Contribution

| Top features for positive contribution |            |                   |       |                          |
|----------------------------------------|------------|-------------------|-------|--------------------------|
| Fingerprint                            | Bit/Smiles | Feature Structure | Score | Irritant in training set |
| FCFP_12                                | 17         | <br>[*]:n:[*]     | 0.189 | 48 out of 49             |



|                                               |                   |                                                                                                                            |              |                                 |
|-----------------------------------------------|-------------------|----------------------------------------------------------------------------------------------------------------------------|--------------|---------------------------------|
| FCFP_12                                       | -885550502        | 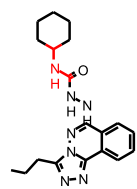<br><chem>[*]C([*])NC(=[*])[*]</chem>   | 0.18         | 64 out of 66                    |
| FCFP_12                                       | 4427049           | <br><chem>[*][c](:[*]):n:n(:[*])</chem> | 0.167        | 4 out of 4                      |
| <b>Top Features for negative contribution</b> |                   |                                                                                                                            |              |                                 |
| <b>Fingerprint</b>                            | <b>Bit/Smiles</b> | <b>Feature Structure</b>                                                                                                   | <b>Score</b> | <b>Irritant in training set</b> |
| FCFP_12                                       | 1175638033        | <br><chem>[*]C1[*]CCCC1</chem>          | -0.133       | 207 out of 293                  |
| FCFP_12                                       | -1525101452       | <br><chem>[*]C1CCCCC1</chem>           | -0.127       | 108 out of 152                  |
| FCFP_12                                       | 1                 | <br><chem>[*]=O</chem>                | 0            | 872 out of 1051                 |

7b

TOPKAT\_Ocular\_Irritancy\_None\_vs\_Irritant

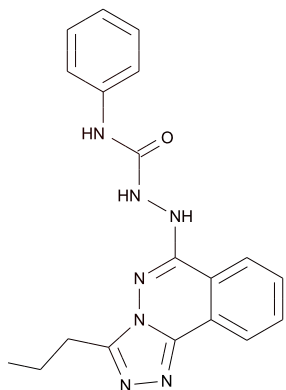C<sub>19</sub>H<sub>19</sub>N<sub>7</sub>O

Molecular Weight: 361.40046

ALogP: 3.399

Rotatable Bonds: 5

Acceptors: 5

Donors: 3

## Model Prediction

Prediction: Irritant

Probability: 1

Enrichment: 1.18

Bayesian Score: 1.51

Mahalanobis Distance: 6.14

Mahalanobis Distance p-value: 1

Prediction: Positive if the Bayesian score is above the estimated best cutoff value from minimizing the false positive and false negative rate.

Probability: The estimated probability that the sample is in the positive category. This assumes that the Bayesian score follows a normal distribution and is different from the prediction using a cutoff.

Enrichment: An estimate of enrichment, that is, the increased likelihood (versus random) of this sample being in the category.

Bayesian Score: The standard Laplacian-modified Bayesian score.

Mahalanobis Distance: The Mahalanobis distance (MD) is the distance to the center of the training data. The larger the MD, the less trustworthy the prediction.

Mahalanobis Distance p-value: The p-value gives the fraction of training data with an MD greater than or equal to the one for the given sample, assuming normally distributed data. The smaller the p-value, the less trustworthy the prediction. For highly non-normal X properties (e.g., fingerprints), the MD p-value is wildly inaccurate.

## Structural Similar Compounds

| Name               | ANTHRAQUINONE; 1-((2-HYDROXYETHYL)AMINO)-4-(METHYLAMINO)- | Disperse Black 9                    | METHANE;TRIS(4-AMINOPHENYL)- |
|--------------------|-----------------------------------------------------------|-------------------------------------|------------------------------|
| Structure          |                                                           |                                     |                              |
| Actual Endpoint    | Irritant                                                  | Non-Irritant                        | Irritant                     |
| Predicted Endpoint | Irritant                                                  | Non-Irritant                        | Irritant                     |
| Distance           | 0.636                                                     | 0.639                               | 0.699                        |
| Reference          | 28ZPAK 245;72                                             | J. Am. Coll. Toxicol. 5(3):205;1986 | 28ZPAK-;73;72                |

## Model Applicability

Unknown features are fingerprint features in the query molecule, but not found or appearing too infrequently in the training set.

- All properties and OPS components are within expected ranges.
- Unknown FCFP\_2 feature: -1151884458: [\*]N[c](:n:[\*]):[c](:[\*]):[\*]
- Unknown FCFP\_2 feature: -1564473960: [\*]:n1:[\*]:[\*]:n:[c]:1:[c](:[\*]):[\*]
- Unknown FCFP\_2 feature: -885461129: [\*]NNC(=[\*])[\*]

## Feature Contribution

### Top features for positive contribution

| Fingerprint | Bit/Smiles | Feature Structure | Score | Irritant in training set |
|-------------|------------|-------------------|-------|--------------------------|
| FCFP_12     | 17         | <br>[*]:n:[*]     | 0.189 | 48 out of 49             |

|                                               |                   |                                                                                                                                             |              |                                 |
|-----------------------------------------------|-------------------|---------------------------------------------------------------------------------------------------------------------------------------------|--------------|---------------------------------|
| FCFP_12                                       | 4427049           | 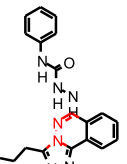<br><chem>[*][c](:[*]):n:n(:[*])</chem>                  | 0.167        | 4 out of 4                      |
| FCFP_12                                       | -1539162406       | <br><chem>[*]C[c]1:n:[*]:[*]:n:1:[*]</chem>              | 0.156        | 3 out of 3                      |
| <b>Top Features for negative contribution</b> |                   |                                                                                                                                             |              |                                 |
| <b>Fingerprint</b>                            | <b>Bit/Smiles</b> | <b>Feature Structure</b>                                                                                                                    | <b>Score</b> | <b>Irritant in training set</b> |
| FCFP_12                                       | -2093839777       | <br><chem>[*][c]1:[cH]:[cH]:[cH]:[cH]:[cH]:[cH]:1</chem> | 0            | 94 out of 121                   |
| FCFP_12                                       | -792685140        | <br><chem>[*]C(=[*])N[c]1:[cH]:[cH]:[cH]:[cH]:1</chem>  | 0            | 5 out of 6                      |
| FCFP_12                                       | 0                 | <br><chem>[*]C[*]</chem>                               | 0            | 1184 out of 1397                |



|                                               |                   |                                                                                                                                                |              |                                 |
|-----------------------------------------------|-------------------|------------------------------------------------------------------------------------------------------------------------------------------------|--------------|---------------------------------|
| FCFP_12                                       | -885550502        | 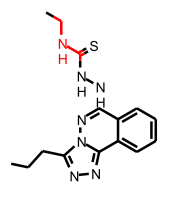<br><chem>[*]C([*])NC(=[*])[*]</chem>                       | 0.18         | 64 out of 66                    |
| FCFP_12                                       | -1939253119       | <br><chem>[*]C(=[*])NCC</chem>                              | 0.175        | 5 out of 5                      |
| <b>Top Features for negative contribution</b> |                   |                                                                                                                                                |              |                                 |
| <b>Fingerprint</b>                            | <b>Bit/Smiles</b> | <b>Feature Structure</b>                                                                                                                       | <b>Score</b> | <b>Irritant in training set</b> |
| FCFP_12                                       | -1272798659       | <br><chem>[*]CCC</chem>                                     | 0            | 517 out of 643                  |
| FCFP_12                                       | 307419094         | <br><chem>[*][c](:[*]):[c](:[cH]:[*]):[c](:[*]):[*]</chem> | 0            | 43 out of 52                    |
| FCFP_12                                       | 1                 | <br><chem>[*]=O</chem>                                    | 0            | 872 out of 1051                 |

8b

TOPKAT\_Ocular\_Irritancy\_None\_vs\_Irritant

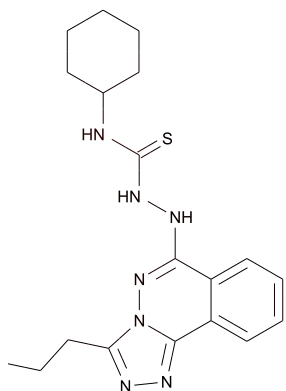C<sub>19</sub>H<sub>25</sub>N<sub>7</sub>S

Molecular Weight: 383.51369

ALogP: 4.898

Rotatable Bonds: 7

Acceptors: 5

Donors: 3

## Model Prediction

Prediction: Irritant

Probability: 1

Enrichment: 1.18

Bayesian Score: 1.32

Mahalanobis Distance: 9.32

Mahalanobis Distance p-value: 0.342

Prediction: Positive if the Bayesian score is above the estimated best cutoff value from minimizing the false positive and false negative rate.

Probability: The estimated probability that the sample is in the positive category. This assumes that the Bayesian score follows a normal distribution and is different from the prediction using a cutoff.

Enrichment: An estimate of enrichment, that is, the increased likelihood (versus random) of this sample being in the category.

Bayesian Score: The standard Laplacian-modified Bayesian score.

Mahalanobis Distance: The Mahalanobis distance (MD) is the distance to the center of the training data. The larger the MD, the less trustworthy the prediction.

Mahalanobis Distance p-value: The p-value gives the fraction of training data with an MD greater than or equal to the one for the given sample, assuming normally distributed data. The smaller the p-value, the less trustworthy the prediction. For highly non-normal X properties (e.g., fingerprints), the MD p-value is wildly inaccurate.

## Structural Similar Compounds

| Name               | 4;4'-DIAMINO-1;1'-DIANTHRIMIDE | Disperse Black 9                    | BENZANILIDE;2';2'''-DITHIOBIS- |
|--------------------|--------------------------------|-------------------------------------|--------------------------------|
| Structure          |                                |                                     |                                |
| Actual Endpoint    | Irritant                       | Non-Irritant                        | Non-Irritant                   |
| Predicted Endpoint | Irritant                       | Non-Irritant                        | Non-Irritant                   |
| Distance           | 0.747                          | 0.748                               | 0.774                          |
| Reference          | 28ZPAK-;125;72                 | J. Am. Coll. Toxicol. 5(3):205;1986 | 28ZPAK-;173;72                 |

## Model Applicability

Unknown features are fingerprint features in the query molecule, but not found or appearing too infrequently in the training set.

1. All properties and OPS components are within expected ranges.
2. Unknown FCFP\_2 feature: -1151884458: [\*]N[c](:n:[\*]):[c](:[\*]):[\*]
3. Unknown FCFP\_2 feature: -1564473960: [\*]:n1:[\*]:[\*]:n:[c]:1:[c](:[\*]):[\*]
4. Unknown FCFP\_2 feature: -885461129: [\*]NNC(=[\*])[\*]

## Feature Contribution

### Top features for positive contribution

| Fingerprint | Bit/Smiles | Feature Structure | Score | Irritant in training set |
|-------------|------------|-------------------|-------|--------------------------|
| FCFP_12     | 17         |                   | 0.189 | 48 out of 49             |

|                                               |                   |                                                                                                                            |              |                                 |
|-----------------------------------------------|-------------------|----------------------------------------------------------------------------------------------------------------------------|--------------|---------------------------------|
| FCFP_12                                       | -885550502        | 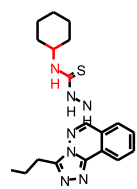<br><chem>[*]C([*])NC(=[*])[*]</chem>   | 0.18         | 64 out of 66                    |
| FCFP_12                                       | 4427049           | <br><chem>[*][c](:[*]):n:n(:[*])</chem> | 0.167        | 4 out of 4                      |
| <b>Top Features for negative contribution</b> |                   |                                                                                                                            |              |                                 |
| <b>Fingerprint</b>                            | <b>Bit/Smiles</b> | <b>Feature Structure</b>                                                                                                   | <b>Score</b> | <b>Irritant in training set</b> |
| FCFP_12                                       | 1175638033        | <br><chem>[*]C1[*]CCCC1</chem>          | -0.133       | 207 out of 293                  |
| FCFP_12                                       | -1525101452       | <br><chem>[*]C1CCCCC1</chem>           | -0.127       | 108 out of 152                  |
| FCFP_12                                       | 1                 | <br><chem>[*]=O</chem>                | 0            | 872 out of 1051                 |

9a

TOPKAT\_Ocular\_Irritancy\_None\_vs\_Irritant

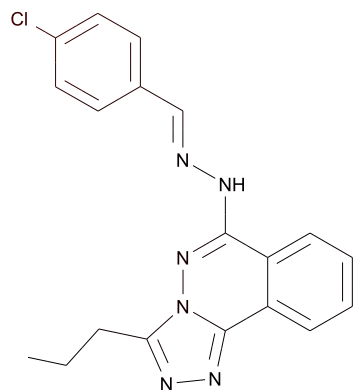

$C_{19}H_{17}ClN_6$   
 Molecular Weight: 364.83147  
 ALogP: 4.967  
 Rotatable Bonds: 5  
 Acceptors: 5  
 Donors: 1

### Model Prediction

Prediction: Irritant

Probability: 1

Enrichment: 1.18

Bayesian Score: 1.81

Mahalanobis Distance: 6.68

Mahalanobis Distance p-value: 1

Prediction: Positive if the Bayesian score is above the estimated best cutoff value from minimizing the false positive and false negative rate.

Probability: The estimated probability that the sample is in the positive category. This assumes that the Bayesian score follows a normal distribution and is different from the prediction using a cutoff.

Enrichment: An estimate of enrichment, that is, the increased likelihood (versus random) of this sample being in the category.

Bayesian Score: The standard Laplacian-modified Bayesian score.

Mahalanobis Distance: The Mahalanobis distance (MD) is the distance to the center of the training data. The larger the MD, the less trustworthy the prediction.

Mahalanobis Distance p-value: The p-value gives the fraction of training data with an MD greater than or equal to the one for the given sample, assuming normally distributed data. The smaller the p-value, the less trustworthy the prediction. For highly non-normal X properties (e.g., fingerprints), the MD p-value is wildly inaccurate.

### Structural Similar Compounds

| Name               | 1-BENZOYLAMINO-4-METHOXY-5-CHLORANTHRAQUINONE | ANTHRAQUINONE; 1;1'-IMINODI- | BENZILIC ACID; 4;4'-DICHLORO-; ISOPROPYL ESTER |
|--------------------|-----------------------------------------------|------------------------------|------------------------------------------------|
| Structure          |                                               |                              |                                                |
| Actual Endpoint    | Irritant                                      | Irritant                     | Irritant                                       |
| Predicted Endpoint | Irritant                                      | Irritant                     | Irritant                                       |
| Distance           | 0.593                                         | 0.607                        | 0.633                                          |
| Reference          | 28ZPAK-;90;72                                 | 28ZPAK-;125;72               | CIGET* -;--;77                                 |

### Model Applicability

Unknown features are fingerprint features in the query molecule, but not found or appearing too infrequently in the training set.

1. All properties and OPS components are within expected ranges.
2. Unknown FCFP\_2 feature: -1151884458: [\*]N[c](:n:[\*]):[c](:[\*]):[\*]
3. Unknown FCFP\_2 feature: -1564473960: [\*]:n1:[\*]:[\*]:n:[c]:1:[c](:[\*]):[\*]
4. Unknown FCFP\_2 feature: 1294285001: [\*]=NN[c](:[\*]):[\*]
5. Unknown FCFP\_2 feature: 581019816: [\*]N\N=C\[\*]

### Feature Contribution

#### Top features for positive contribution

| Fingerprint | Bit/Smiles  | Feature Structure                             | Score | Irritant in training set |
|-------------|-------------|-----------------------------------------------|-------|--------------------------|
| FCFP_12     | -1508180856 | <br>[*][c]1:[cH]:[cH]:[c]<br>(Cl):[cH]:[cH]:1 | 0.2   | 17 out of 17             |



|                                               |                   |                                                                                                                                     |              |                                 |
|-----------------------------------------------|-------------------|-------------------------------------------------------------------------------------------------------------------------------------|--------------|---------------------------------|
| FCFP_12                                       | 17                | 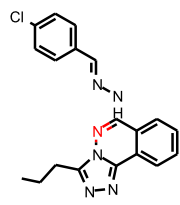<br>[*]:n:[*]                                     | 0.189        | 48 out of 49                    |
| FCFP_12                                       | -149636017        | <br>[*]=C[c]1:[cH]:[cH]:[c]<br>c(Cl):[cH]:[cH]:1 | 0.184        | 7 out of 7                      |
| <b>Top Features for negative contribution</b> |                   |                                                                                                                                     |              |                                 |
| <b>Fingerprint</b>                            | <b>Bit/Smiles</b> | <b>Feature Structure</b>                                                                                                            | <b>Score</b> | <b>Irritant in training set</b> |
| FCFP_12                                       | 136597326         | <br>[*]CC                                        | 0            | 612 out of 753                  |
| FCFP_12                                       | 203677720         | <br>[*]=C[c](:[cH]:[*]):[cH]:[*]                | 0            | 319 out of 382                  |
| FCFP_12                                       | -1272798659       | <br>[*]CCC                                     | 0            | 517 out of 643                  |



|                                               |                   |                                                                                                                                |              |                                 |
|-----------------------------------------------|-------------------|--------------------------------------------------------------------------------------------------------------------------------|--------------|---------------------------------|
| FCFP_12                                       | 17                | 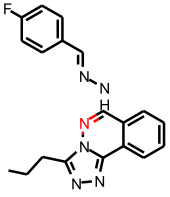<br>[*]:n:[*]                               | 0.189        | 48 out of 49                    |
| FCFP_12                                       | -149636017        | <br>[*]=C[c]1:[cH]:[cH]:[c](Cl):[cH]:[cH]:1 | 0.184        | 7 out of 7                      |
| <b>Top Features for negative contribution</b> |                   |                                                                                                                                |              |                                 |
| <b>Fingerprint</b>                            | <b>Bit/Smiles</b> | <b>Feature Structure</b>                                                                                                       | <b>Score</b> | <b>Irritant in training set</b> |
| FCFP_12                                       | -453677277        | <br>[*][c]1:[*]:[cH]:[c](C=[*]):[cH]:[cH]:1 | 0            | 264 out of 323                  |
| FCFP_12                                       | 991735244         | <br>[*]:[c]1:[*]:[cH]:[cH]:[cH]:[cH]:1     | 0            | 237 out of 291                  |
| FCFP_12                                       | 136597326         | <br>[*]CC                                 | 0            | 612 out of 753                  |

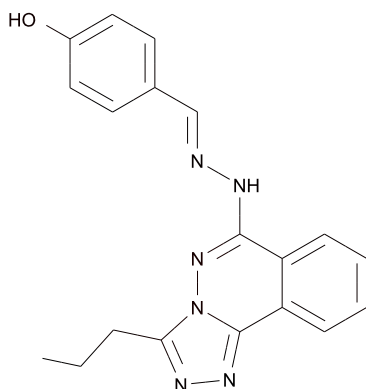

$C_{19}H_{18}N_6O$

Molecular Weight: 346.38582

ALogP: 4.061

Rotatable Bonds: 5

Acceptors: 6

Donors: 2

## Model Prediction

**Prediction: Irritant**

Probability: 1

Enrichment: 1.18

Bayesian Score: 1.27

Mahalanobis Distance: 6.78

Mahalanobis Distance p-value: 0.999

Prediction: Positive if the Bayesian score is above the estimated best cutoff value from minimizing the false positive and false negative rate.

Probability: The estimated probability that the sample is in the positive category. This assumes that the Bayesian score follows a normal distribution and is different from the prediction using a cutoff.

Enrichment: An estimate of enrichment, that is, the increased likelihood (versus random) of this sample being in the category.

Bayesian Score: The standard Laplacian-modified Bayesian score.

Mahalanobis Distance: The Mahalanobis distance (MD) is the distance to the center of the training data. The larger the MD, the less trustworthy the prediction.

Mahalanobis Distance p-value: The p-value gives the fraction of training data with an MD greater than or equal to the one for the given sample, assuming normally distributed data. The smaller the p-value, the less trustworthy the prediction. For highly non-normal X properties (e.g., fingerprints), the MD p-value is wildly inaccurate.

## Structural Similar Compounds

| Name               | ANTHRAQUINONE; 1-AMINO-4-HYDROXY-2-PHENOXY- | 2;2';-Dihydroxy-4;4'-dimethoxybenzophenone | s-TRIAZINE; 2;4-BIS(ISOPROPYLAMINO)-6-(METHYLTHIO)- |
|--------------------|---------------------------------------------|--------------------------------------------|-----------------------------------------------------|
| Structure          |                                             |                                            |                                                     |
| Actual Endpoint    | Irritant                                    | Non-Irritant                               | Irritant                                            |
| Predicted Endpoint | Irritant                                    | Non-Irritant                               | Irritant                                            |
| Distance           | 0.607                                       | 0.655                                      | 0.679                                               |
| Reference          | 28ZPAK 239;72                               | J. Am. Coll. Toxicol. 2(5):35;1983         | CIGET* -;-;77                                       |

## Model Applicability

Unknown features are fingerprint features in the query molecule, but not found or appearing too infrequently in the training set.

1. All properties and OPS components are within expected ranges.
2. Unknown FCFP\_2 feature: -1151884458: [\*]N[c](:n:[\*]):[c](:[\*]):[\*]
3. Unknown FCFP\_2 feature: -1564473960: [\*]:n1:[\*]:[\*]:n:[c]:1:[c](:[\*]):[\*]
4. Unknown FCFP\_2 feature: 1294285001: [\*]=NN[c](:[\*]):[\*]
5. Unknown FCFP\_2 feature: 581019816: [\*]N\N=C[\*]

## Feature Contribution

| Top features for positive contribution |            |                   |       |                          |
|----------------------------------------|------------|-------------------|-------|--------------------------|
| Fingerprint                            | Bit/Smiles | Feature Structure | Score | Irritant in training set |
| FCFP_12                                | 17         | <br>[*]:n:[*]     | 0.189 | 48 out of 49             |

| FCFP_12                                | 4427049     | 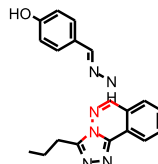<br>[*][c(:[*]):n:n(:[*])<br>):[*]                | 0.167   | 4 out of 4               |
|----------------------------------------|-------------|--------------------------------------------------------------------------------------------------------------------------------------|---------|--------------------------|
| FCFP_12                                | -1539162406 | <br>[*]C[c]1:n:[*]:[*]:n:<br>1:[*]                | 0.156   | 3 out of 3               |
| Top Features for negative contribution |             |                                                                                                                                      |         |                          |
| Fingerprint                            | Bit/Smiles  | Feature Structure                                                                                                                    | Score   | Irritant in training set |
| FCFP_12                                | -1066794953 | <br>[*][c]1:[cH]:[cH]:[c]<br>(O):[cH]:[cH]:1      | -0.0509 | 13 out of 17             |
| FCFP_12                                | -158888774  | <br>O[c]1:[cH]:[cH]:[*]:[<br>cH]:[cH]:1          | 0       | 25 out of 30             |
| FCFP_12                                | -453677277  | <br>[*][c]1:[*]:[cH]:[c]<br>(C=[*]):[cH]:[cH]:1 | 0       | 264 out of 323           |

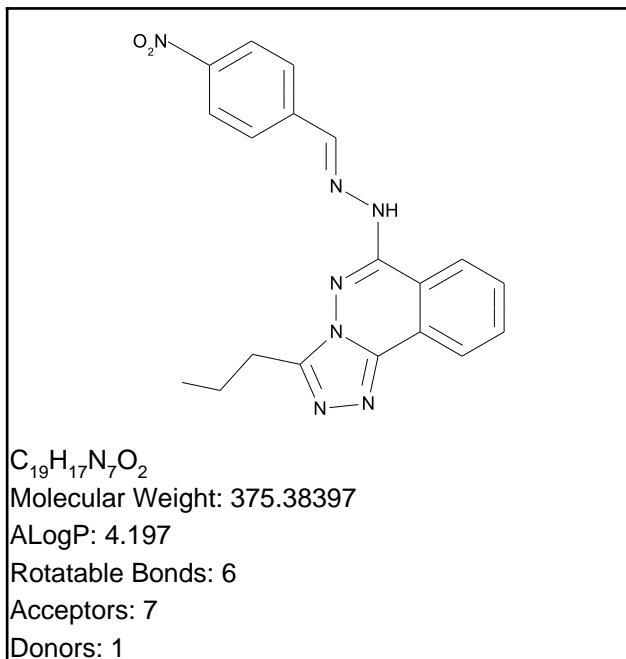

### Model Prediction

Prediction: Irritant

Probability: 1

Enrichment: 1.18

Bayesian Score: 1.09

Mahalanobis Distance: 7.36

Mahalanobis Distance p-value: 0.991

Prediction: Positive if the Bayesian score is above the estimated best cutoff value from minimizing the false positive and false negative rate.

Probability: The estimated probability that the sample is in the positive category. This assumes that the Bayesian score follows a normal distribution and is different from the prediction using a cutoff.

Enrichment: An estimate of enrichment, that is, the increased likelihood (versus random) of this sample being in the category.

Bayesian Score: The standard Laplacian-modified Bayesian score.

Mahalanobis Distance: The Mahalanobis distance (MD) is the distance to the center of the training data. The larger the MD, the less trustworthy the prediction.

Mahalanobis Distance p-value: The p-value gives the fraction of training data with an MD greater than or equal to the one for the given sample, assuming normally distributed data. The smaller the p-value, the less trustworthy the prediction. For highly non-normal X properties (e.g., fingerprints), the MD p-value is wildly inaccurate.

### Structural Similar Compounds

| Name               | COLCHICINE                                                                          | 1;4-PENTADIENE-3-ONE;1;5-BIS(4-(2;3-DIDEHYDROTRIAZIRIDINYL)PHENYL)-                 | ANTHRAQUINONE; 1;1'-IMINODI-                                                        |
|--------------------|-------------------------------------------------------------------------------------|-------------------------------------------------------------------------------------|-------------------------------------------------------------------------------------|
| Structure          | 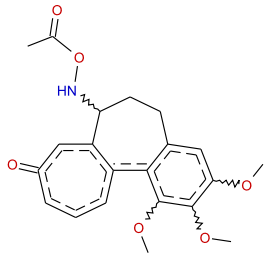 |  |  |
| Actual Endpoint    | Irritant                                                                            | Irritant                                                                            | Irritant                                                                            |
| Predicted Endpoint | Irritant                                                                            | Irritant                                                                            | Irritant                                                                            |
| Distance           | 0.692                                                                               | 0.741                                                                               | 0.753                                                                               |
| Reference          | AJOPAA 31;837;48                                                                    | 28ZPAK-;123;72                                                                      | 28ZPAK-;125;72                                                                      |

### Model Applicability

Unknown features are fingerprint features in the query molecule, but not found or appearing too infrequently in the training set.

1. All properties and OPS components are within expected ranges.
2. Unknown FCFP\_2 feature: -1151884458: [\*]N[c](:n:[\*]):[c](:[\*]):[\*]
3. Unknown FCFP\_2 feature: -1564473960: [\*]:n1:[\*]:[\*]:n:[c]:1:[c](:[\*]):[\*]
4. Unknown FCFP\_2 feature: 1294285001: [\*]=NN[c](:[\*]):[\*]
5. Unknown FCFP\_2 feature: 581019816: [\*]N\N=C\[\*]
6. Unknown FCFP\_2 feature: -828984032: [\*][N+](=[\*])[c](:[cH]:[\*]):[cH]:[\*]
7. Unknown FCFP\_2 feature: -1338588315: [\*]:[c](:[\*])[N+](=O)[O-]
8. Unknown FCFP\_2 feature: 1872392852: [\*][N+](=O)[\*]
9. Unknown FCFP\_2 feature: 260476081: [\*][N+](=[\*])[O-]

### Feature Contribution

#### Top features for positive contribution

| Fingerprint | Bit/Smiles | Feature Structure | Score | Irritant in training set |
|-------------|------------|-------------------|-------|--------------------------|
|             |            |                   |       |                          |

|                                               |                   |                                                                                                                                          |              |                                 |
|-----------------------------------------------|-------------------|------------------------------------------------------------------------------------------------------------------------------------------|--------------|---------------------------------|
| FCFP_12                                       | 17                | 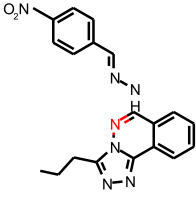<br><chem>[*]:n:[*]</chem>                            | 0.189        | 48 out of 49                    |
| FCFP_12                                       | 4427049           | <br><chem>[*][c](:[*]):n:n(:[*]):[*]</chem>           | 0.167        | 4 out of 4                      |
| FCFP_12                                       | -1539162406       | <br><chem>[*]C[c]1:n:[*]:[*]:n:1:[*]</chem>           | 0.156        | 3 out of 3                      |
| <b>Top Features for negative contribution</b> |                   |                                                                                                                                          |              |                                 |
| <b>Fingerprint</b>                            | <b>Bit/Smiles</b> | <b>Feature Structure</b>                                                                                                                 | <b>Score</b> | <b>Irritant in training set</b> |
| FCFP_12                                       | 8                 | <br><chem>[*][N+](=[*])[*]</chem>                    | -0.0561      | 3 out of 4                      |
| FCFP_12                                       | 991735244         | <br><chem>[*]:[c]1:[*]:[cH]:[cH]:[cH]:[cH]:1</chem> | 0            | 237 out of 291                  |

|         |           |                                                                                              |   |                |
|---------|-----------|----------------------------------------------------------------------------------------------|---|----------------|
| FCFP_12 | 136597326 | 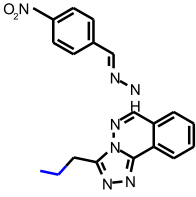<br>[*]CC | 0 | 612 out of 753 |
|---------|-----------|----------------------------------------------------------------------------------------------|---|----------------|



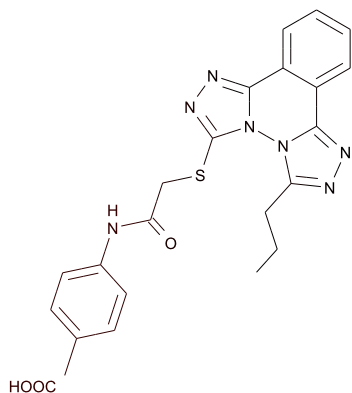

$C_{22}H_{19}N_7O_3S$

Molecular Weight: 461.49635

ALogP: 3.42

Rotatable Bonds: 7

Acceptors: 8

Donors: 2

## Model Prediction

**Prediction: Irritant**

Probability: 1

Enrichment: 1.18

Bayesian Score: 2.93

Mahalanobis Distance: 7.78

Mahalanobis Distance p-value: 0.961

Prediction: Positive if the Bayesian score is above the estimated best cutoff value from minimizing the false positive and false negative rate.

Probability: The estimated probability that the sample is in the positive category. This assumes that the Bayesian score follows a normal distribution and is different from the prediction using a cutoff.

Enrichment: An estimate of enrichment, that is, the increased likelihood (versus random) of this sample being in the category.

Bayesian Score: The standard Laplacian-modified Bayesian score.

Mahalanobis Distance: The Mahalanobis distance (MD) is the distance to the center of the training data. The larger the MD, the less trustworthy the prediction.

Mahalanobis Distance p-value: The p-value gives the fraction of training data with an MD greater than or equal to the one for the given sample, assuming normally distributed data. The smaller the p-value, the less trustworthy the prediction. For highly non-normal X properties (e.g., fingerprints), the MD p-value is wildly inaccurate.

## Structural Similar Compounds

| Name               | 4;4'-DIAMINO-1;1'-DIANTHRIMIDE | COLCHICINE       | ANTHRAQUINONE; 1-AMINO-4-HYDROXY-2-PHENOXY- |
|--------------------|--------------------------------|------------------|---------------------------------------------|
| Structure          |                                |                  |                                             |
| Actual Endpoint    | Irritant                       | Irritant         | Irritant                                    |
| Predicted Endpoint | Irritant                       | Irritant         | Irritant                                    |
| Distance           | 0.748                          | 0.825            | 0.843                                       |
| Reference          | 28ZPAK-;125;72                 | AJOPAA 31;837;48 | 28ZPAK 239;72                               |

## Model Applicability

Unknown features are fingerprint features in the query molecule, but not found or appearing too infrequently in the training set.

1. All properties and OPS components are within expected ranges.
2. Unknown FCFP\_2 feature: -1564473960: [\*]:n1:[\*]:[\*]:n:[c]:1:[c](:[\*]):[\*]

## Feature Contribution

### Top features for positive contribution

| Fingerprint | Bit/Smiles  | Feature Structure       | Score | Irritant in training set |
|-------------|-------------|-------------------------|-------|--------------------------|
| FCFP_12     | -1549222613 | <br>[*]:[c](:[*])C(=O)O | 0.198 | 14 out of 14             |

|                                               |                   |                                                                                                                                               |              |                                 |
|-----------------------------------------------|-------------------|-----------------------------------------------------------------------------------------------------------------------------------------------|--------------|---------------------------------|
| FCFP_12                                       | 1175665944        | 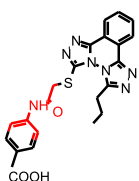<br><chem>[*]CC(=O)Nc1ccc(C(=O)O)cc1</chem>                | 0.198        | 14 out of 14                    |
| FCFP_12                                       | 937923569         | <br><chem>[*]:[cH]:[c](:[cH]:[*])C(=O)O</chem>             | 0.198        | 14 out of 14                    |
| <b>Top Features for negative contribution</b> |                   |                                                                                                                                               |              |                                 |
| <b>Fingerprint</b>                            | <b>Bit/Smiles</b> | <b>Feature Structure</b>                                                                                                                      | <b>Score</b> | <b>Irritant in training set</b> |
| FCFP_12                                       | -773983804        | <br><chem>[*]Nc1ccc(C(=O)O)cc1</chem>                      | 0            | 102 out of 121                  |
| FCFP_12                                       | -453677277        | <br><chem>[*][c]1:.[*]:[cH]:[c](C=[*]):[cH]:[cH]:1</chem> | 0            | 264 out of 323                  |
| FCFP_12                                       | 1872154524        | <br><chem>[*]C(=O)[*]</chem>                             | 0            | 563 out of 690                  |

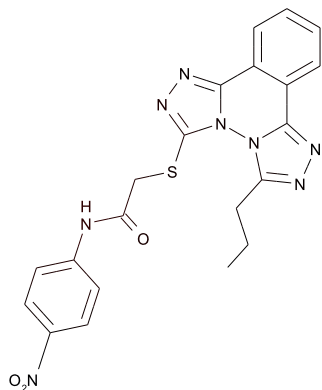

$C_{21}H_{18}N_8O_3S$

Molecular Weight: 462.48441

ALogP: 3.685

Rotatable Bonds: 7

Acceptors: 8

Donors: 1

## Model Prediction

**Prediction: Irritant**

Probability: 1

Enrichment: 1.18

Bayesian Score: 1.94

Mahalanobis Distance: 8.14

Mahalanobis Distance p-value: 0.892

Prediction: Positive if the Bayesian score is above the estimated best cutoff value from minimizing the false positive and false negative rate.

Probability: The estimated probability that the sample is in the positive category. This assumes that the Bayesian score follows a normal distribution and is different from the prediction using a cutoff.

Enrichment: An estimate of enrichment, that is, the increased likelihood (versus random) of this sample being in the category.

Bayesian Score: The standard Laplacian-modified Bayesian score.

Mahalanobis Distance: The Mahalanobis distance (MD) is the distance to the center of the training data. The larger the MD, the less trustworthy the prediction.

Mahalanobis Distance p-value: The p-value gives the fraction of training data with an MD greater than or equal to the one for the given sample, assuming normally distributed data. The smaller the p-value, the less trustworthy the prediction. For highly non-normal X properties (e.g., fingerprints), the MD p-value is wildly inaccurate.

## Structural Similar Compounds

| Name               | COLCHICINE       | 1;8;9-ANTHRACENETRIOL; TRIACETATE | 1;4-PENTADIENE-3-ONE;1;5-BIS(4-(2;3-DIDEHYDROTRIAZIRIDINY L)PHENYL)- |
|--------------------|------------------|-----------------------------------|----------------------------------------------------------------------|
| Structure          |                  |                                   |                                                                      |
| Actual Endpoint    | Irritant         | Irritant                          | Irritant                                                             |
| Predicted Endpoint | Irritant         | Irritant                          | Irritant                                                             |
| Distance           | 0.772            | 0.866                             | 0.872                                                                |
| Reference          | AJOPAA 31;837;48 | BJOPAL 53;819;69                  | 28ZPAK-;123;72                                                       |

## Model Applicability

Unknown features are fingerprint features in the query molecule, but not found or appearing too infrequently in the training set.

1. All properties and OPS components are within expected ranges.
2. Unknown FCFP\_2 feature: -1564473960: [\*]:n1:[\*]:[\*]:n:[c]:1:[c](:[\*]):[\*]
3. Unknown FCFP\_2 feature: -828984032: [\*][N+](=[\*])[c](:[cH]:[\*]):[cH]:[\*]
4. Unknown FCFP\_2 feature: -1338588315: [\*]:[c](:[\*])[N+](=O)[O-]
5. Unknown FCFP\_2 feature: 1872392852: [\*][N+](=O)[\*]
6. Unknown FCFP\_2 feature: 260476081: [\*][N+](=[\*])[O-]

## Feature Contribution

### Top features for positive contribution

| Fingerprint | Bit/Smiles | Feature Structure | Score | Irritant in training set |
|-------------|------------|-------------------|-------|--------------------------|
|-------------|------------|-------------------|-------|--------------------------|

|                                               |                   |                                                                                                                           |              |                                 |
|-----------------------------------------------|-------------------|---------------------------------------------------------------------------------------------------------------------------|--------------|---------------------------------|
| FCFP_12                                       | 1175665944        | 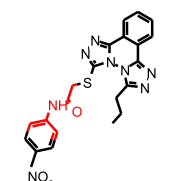<br>[*]CC(=O)N[*]c1c([cH]1[*])[cH]1[*] | 0.198        | 14 out of 14                    |
| FCFP_12                                       | 17                | <br>[*]:n:[*]                          | 0.189        | 48 out of 49                    |
| FCFP_12                                       | -1410079687       | <br>[*]S[*]n:[*]:[*]:n:1:[*]           | 0.187        | 8 out of 8                      |
| <b>Top Features for negative contribution</b> |                   |                                                                                                                           |              |                                 |
| <b>Fingerprint</b>                            | <b>Bit/Smiles</b> | <b>Feature Structure</b>                                                                                                  | <b>Score</b> | <b>Irritant in training set</b> |
| FCFP_12                                       | 8                 | <br>[*][N+](=[*])[*]                  | -0.0561      | 3 out of 4                      |
| FCFP_12                                       | 1                 | <br>[*]=O                            | 0            | 872 out of 1051                 |

|         |   |                                                                                                                                                                 |   |                  |
|---------|---|-----------------------------------------------------------------------------------------------------------------------------------------------------------------|---|------------------|
| FCFP_12 | 0 | 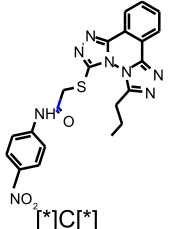<br><chem>CCCN1C=NC2=C1N=CN=C2C(=O)Nc3ccc([N+](=O)[O-])cc3</chem><br>[*][C*] | 0 | 1184 out of 1397 |
|---------|---|-----------------------------------------------------------------------------------------------------------------------------------------------------------------|---|------------------|

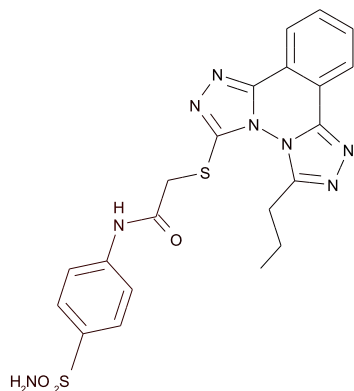

$C_{21}H_{20}N_8O_3S_2$   
 Molecular Weight: 496.56529  
 ALogP: 2.496  
 Rotatable Bonds: 7  
 Acceptors: 8  
 Donors: 2

### Model Prediction

**Prediction: Irritant**

Probability: 1

Enrichment: 1.18

Bayesian Score: 2.72

Mahalanobis Distance: 8.46

Mahalanobis Distance p-value: 0.781

Prediction: Positive if the Bayesian score is above the estimated best cutoff value from minimizing the false positive and false negative rate.

Probability: The estimated probability that the sample is in the positive category. This assumes that the Bayesian score follows a normal distribution and is different from the prediction using a cutoff.

Enrichment: An estimate of enrichment, that is, the increased likelihood (versus random) of this sample being in the category. Bayesian Score: The standard Laplacian-modified Bayesian score.

Mahalanobis Distance: The Mahalanobis distance (MD) is the distance to the center of the training data. The larger the MD, the less trustworthy the prediction.

Mahalanobis Distance p-value: The p-value gives the fraction of training data with an MD greater than or equal to the one for the given sample, assuming normally distributed data. The smaller the p-value, the less trustworthy the prediction. For highly non-normal X properties (e.g., fingerprints), the MD p-value is wildly inaccurate.

### Structural Similar Compounds

| Name               | 2:2'-Stilbenedisulfonic acid; 4:4'-dinitro-                             | 2:7-NAPHTHALENE DISULFONIC ACID;4-AMINO-5-HYDROXY-P-TOLUENE SULFONATE (ESTER) | 4:4'-DIAMINO-1:1'-DIANTHRIMIDE |
|--------------------|-------------------------------------------------------------------------|-------------------------------------------------------------------------------|--------------------------------|
| Structure          |                                                                         |                                                                               |                                |
| Actual Endpoint    | Irritant                                                                | Irritant                                                                      | Irritant                       |
| Predicted Endpoint | Irritant                                                                | Irritant                                                                      | Irritant                       |
| Distance           | 0.783                                                                   | 0.786                                                                         | 0.793                          |
| Reference          | Prehled Prumyslove Toxikologie; Organicke Latky; Marhold; J. pp 1062;86 | 28ZPAK-;194;72                                                                | 28ZPAK-;125;72                 |

### Model Applicability

Unknown features are fingerprint features in the query molecule, but not found or appearing too infrequently in the training set.

- All properties and OPS components are within expected ranges.
- Unknown FCFP\_2 feature: -1564473960: [\*]:n1:[\*]:[\*]:n:[c]:1:[c](:[\*]):[\*]

### Feature Contribution

| Top features for positive contribution |            |                                                                     |       |                          |
|----------------------------------------|------------|---------------------------------------------------------------------|-------|--------------------------|
| Fingerprint                            | Bit/Smiles | Feature Structure                                                   | Score | Irritant in training set |
| FCFP_12                                | 1175665944 | <br><chem>HNO.S</chem><br>[*]C(=O)N(c) ([c]H) [*]<br>[*] ([c]H) [*] | 0.198 | 14 out of 14             |

|                                               |                   |                                                                                                                                            |              |                                 |
|-----------------------------------------------|-------------------|--------------------------------------------------------------------------------------------------------------------------------------------|--------------|---------------------------------|
| FCFP_12                                       | 17                | 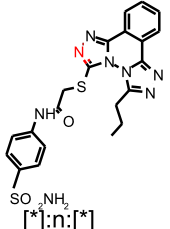<br>[*]:n:[*]                                           | 0.189        | 48 out of 49                    |
| FCFP_12                                       | -1410079687       | <br>[*]S[c]1:n:[*]:[*]:n:<br>1:[*]                      | 0.187        | 8 out of 8                      |
| <b>Top Features for negative contribution</b> |                   |                                                                                                                                            |              |                                 |
| <b>Fingerprint</b>                            | <b>Bit/Smiles</b> | <b>Feature Structure</b>                                                                                                                   | <b>Score</b> | <b>Irritant in training set</b> |
| FCFP_12                                       | 1872154524        | <br>SO <sub>2</sub> NH <sub>2</sub><br>[*]C(=O)[*]      | 0            | 563 out of 690                  |
| FCFP_12                                       | -1272768868       | <br>SO <sub>2</sub> NH <sub>2</sub><br>[*]SCC(=[*])[*] | 0            | 396 out of 514                  |
| FCFP_12                                       | -1272798659       | <br>SO <sub>2</sub> NH <sub>2</sub><br>[*]CCC         | 0            | 517 out of 643                  |

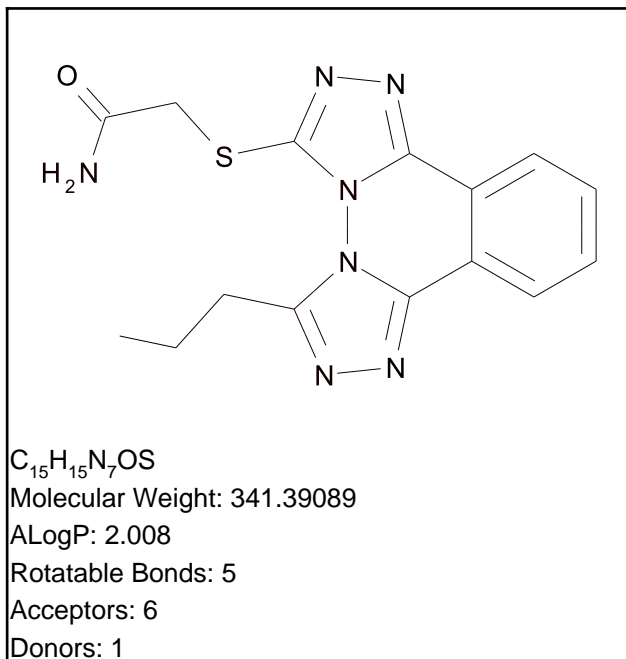

### Model Prediction

**Prediction:** Irritant

Probability: 1

Enrichment: 1.18

Bayesian Score: 1.62

Mahalanobis Distance: 7.73

Mahalanobis Distance p-value: 0.966

Prediction: Positive if the Bayesian score is above the estimated best cutoff value from minimizing the false positive and false negative rate.

Probability: The estimated probability that the sample is in the positive category. This assumes that the Bayesian score follows a normal distribution and is different from the prediction using a cutoff.

Enrichment: An estimate of enrichment, that is, the increased likelihood (versus random) of this sample being in the category. Bayesian Score: The standard Laplacian-modified Bayesian score.

Mahalanobis Distance: The Mahalanobis distance (MD) is the distance to the center of the training data. The larger the MD, the less trustworthy the prediction.

Mahalanobis Distance p-value: The p-value gives the fraction of training data with an MD greater than or equal to the one for the given sample, assuming normally distributed data. The smaller the p-value, the less trustworthy the prediction. For highly non-normal X properties (e.g., fingerprints), the MD p-value is wildly inaccurate.

### Structural Similar Compounds

| Name               | 2,5-DICHLORO-4(3'-METHYL-5' PYRAZOLON-1'-YL)BENZENE SULFONIC ACID | Benzenesulfonic acid; 3,5-bis(methoxycarbonyl)-; sodium salt            | Benzenesulfonic acid; 2-anilino-5-nitro-                                |
|--------------------|-------------------------------------------------------------------|-------------------------------------------------------------------------|-------------------------------------------------------------------------|
| Structure          |                                                                   |                                                                         |                                                                         |
| Actual Endpoint    | Irritant                                                          | Irritant                                                                | Irritant                                                                |
| Predicted Endpoint | Irritant                                                          | Non-Irritant                                                            | Irritant                                                                |
| Distance           | 0.600                                                             | 0.649                                                                   | 0.660                                                                   |
| Reference          | 28ZPAK-;186;72                                                    | Prehled Prumyslove Toxikologie; Organicke Latky; Marhold; J. - ;1059;86 | Prehled Prumyslove Toxikologie; Organicke Latky; Marhold; J. - ;1061;86 |

### Model Applicability

Unknown features are fingerprint features in the query molecule, but not found or appearing too infrequently in the training set.

1. All properties and OPS components are within expected ranges.
2. Unknown FCFP\_2 feature: -1564473960: [\*]:n1:[\*]:[\*]:n:[c]:1:[c](:[\*]):[\*]

### Feature Contribution

#### Top features for positive contribution

| Fingerprint | Bit/Smiles | Feature Structure | Score | Irritant in training set |
|-------------|------------|-------------------|-------|--------------------------|
| FCFP_12     | 17         | <br>[*]:n:[*]     | 0.189 | 48 out of 49             |



|                                               |                   |                                                                                                                                        |              |                                 |
|-----------------------------------------------|-------------------|----------------------------------------------------------------------------------------------------------------------------------------|--------------|---------------------------------|
| FCFP_12                                       | -1410079687       | 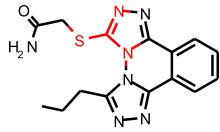<br>[*]S[c]1:n:[*]:[*]:n:<br>1:[*]                  | 0.187        | 8 out of 8                      |
| FCFP_12                                       | 4427049           | <br>[*][c](:[*]):n:n(:[*]<br>):[*]                  | 0.167        | 4 out of 4                      |
| <b>Top Features for negative contribution</b> |                   |                                                                                                                                        |              |                                 |
| <b>Fingerprint</b>                            | <b>Bit/Smiles</b> | <b>Feature Structure</b>                                                                                                               | <b>Score</b> | <b>Irritant in training set</b> |
| FCFP_12                                       | -1272798659       | <br>[*]CCC                                          | 0            | 517 out of 643                  |
| FCFP_12                                       | -1272768868       | <br>[*]SCC(=[*])[*]                                | 0            | 396 out of 514                  |
| FCFP_12                                       | 307419094         | <br>[*][c](:[*]):[c](:[cH<br>]:[*]):[c](:[*]):[*] | 0            | 43 out of 52                    |

# Doxorubicin

# TOPKAT\_Ocular\_Irritancy\_None\_vs\_Irritant

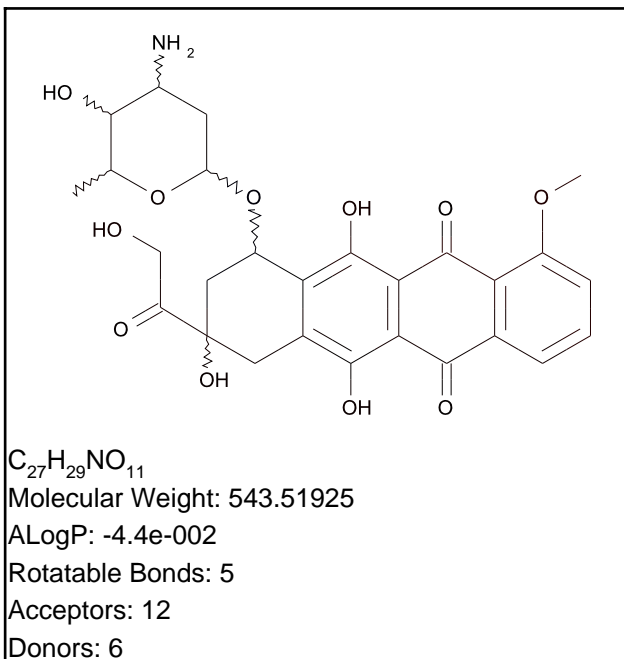

## Model Prediction

Prediction: Irritant

Probability: 1

Enrichment: 1.18

Bayesian Score: 1.88

Mahalanobis Distance: 14.4

Mahalanobis Distance p-value: 1.33e-011

Prediction: Positive if the Bayesian score is above the estimated best cutoff value from minimizing the false positive and false negative rate.

Probability: The estimated probability that the sample is in the positive category. This assumes that the Bayesian score follows a normal distribution and is different from the prediction using a cutoff.

Enrichment: An estimate of enrichment, that is, the increased likelihood (versus random) of this sample being in the category.

Bayesian Score: The standard Laplacian-modified Bayesian score.

Mahalanobis Distance: The Mahalanobis distance (MD) is the distance to the center of the training data. The larger the MD, the less trustworthy the prediction.

Mahalanobis Distance p-value: The p-value gives the fraction of training data with an MD greater than or equal to the one for the given sample, assuming normally distributed data. The smaller the p-value, the less trustworthy the prediction. For highly non-normal X properties (e.g., fingerprints), the MD p-value is wildly inaccurate.

## Structural Similar Compounds

| Name               | Methanol; (s-triazine-2;4;6-tryltrinitrilo)hexa-                                    | 2-Naphthalenesulfonic acid; 5,6'-iminobis(1-hydroxy-                                | 1;3;6-NAPHTHALENE TRISULFONIC ACID;7-AMINO-                                         |
|--------------------|-------------------------------------------------------------------------------------|-------------------------------------------------------------------------------------|-------------------------------------------------------------------------------------|
| Structure          | 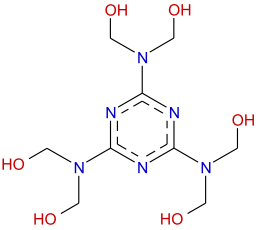 |  |  |
| Actual Endpoint    | Irritant                                                                            | Irritant                                                                            | Irritant                                                                            |
| Predicted Endpoint | Irritant                                                                            | Irritant                                                                            | Irritant                                                                            |
| Distance           | 0.923                                                                               | 0.958                                                                               | 1.164                                                                               |
| Reference          | Prehled Prumyslove Toxikologie; Organicke Latky; Marhold; J. -;876;86               | Prehled Prumyslove Toxikologie; Organicke Latky; Marhold; J. pp 1065;86             | 28ZPAK-;190;72                                                                      |

## Model Applicability

Unknown features are fingerprint features in the query molecule, but not found or appearing too infrequently in the training set.

- OPS PC15 out of range. Value: 4.2823. Training min, max, SD, explained variance: -4.3422, 4.1885, 1.08, 0.0142.

## Feature Contribution

### Top features for positive contribution

| Fingerprint | Bit/Smiles | Feature Structure                                                                                                             | Score | Irritant in training set |
|-------------|------------|-------------------------------------------------------------------------------------------------------------------------------|-------|--------------------------|
| FCFP_12     | -415156552 | 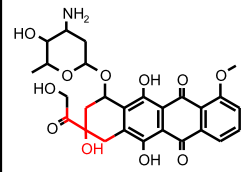<br><chem>[*]CC(O)(C(*)C(=O)O)[*]</chem> | 0.184 | 7 out of 7               |

|                                               |                   |                                                                                                                                                                              |              |                                 |
|-----------------------------------------------|-------------------|------------------------------------------------------------------------------------------------------------------------------------------------------------------------------|--------------|---------------------------------|
| FCFP_12                                       | -1601875224       | 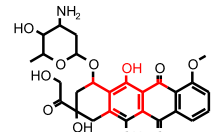<br>[*]C[*][c]1:[c]1:[c]([*])<br>):[*]:[c]([*]):[c](C<br>(=[*])[*]):[c]:1O                | 0.184        | 7 out of 7                      |
| FCFP_12                                       | -1099193755       | <br>[*]C(=[*])[c]1:[c]([*])<br>):[*]:[cH]:[cH]:[c]<br>:1OC                                | 0.175        | 5 out of 5                      |
| <b>Top Features for negative contribution</b> |                   |                                                                                                                                                                              |              |                                 |
| <b>Fingerprint</b>                            | <b>Bit/Smiles</b> | <b>Feature Structure</b>                                                                                                                                                     | <b>Score</b> | <b>Irritant in training set</b> |
| FCFP_12                                       | 1186333723        | <br>[*]CC(O[*])[c]([*]):<br>[*]                                                           | -0.344       | 2 out of 4                      |
| FCFP_12                                       | 1312974458        | <br>[*]O[c]1:[cH]:[cH]:[c]<br>H]:[c]2C(=O)[c]([*])<br>([*]):[*]:[c]([*])<br>C(=O)[c]:1:2 | -0.268       | 1 out of 2                      |
| FCFP_12                                       | -880844584        | <br>[*]O[c]1:[cH]:[*]:[cH]<br>]:[c]2C(=[*])[*]:[c]<br>(:[*])C(=O)[c]:1:2                | -0.132       | 2 out of 3                      |

9a

## TOPKAT\_Skin\_Irritancy\_Mild\_vs\_Moderate\_Severe

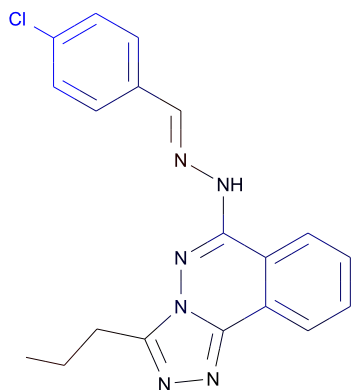C<sub>19</sub>H<sub>17</sub>ClN<sub>6</sub>

Molecular Weight: 364.83147

ALogP: 4.967

Rotatable Bonds: 5

Acceptors: 5

Donors: 1

**Model Prediction**

Prediction: Mild

Probability: 0.0319

Enrichment: 0.0866

Bayesian Score: -12.4

Mahalanobis Distance: 8.52

Mahalanobis Distance p-value: 0.527

Prediction: Positive if the Bayesian score is above the estimated best cutoff value from minimizing the false positive and false negative rate.

Probability: The estimated probability that the sample is in the positive category. This assumes that the Bayesian score follows a normal distribution and is different from the prediction using a cutoff.

Enrichment: An estimate of enrichment, that is, the increased likelihood (versus random) of this sample being in the category.

Bayesian Score: The standard Laplacian-modified Bayesian score.

Mahalanobis Distance: The Mahalanobis distance (MD) is the distance to the center of the training data. The larger the MD, the less trustworthy the prediction.

Mahalanobis Distance p-value: The p-value gives the fraction of training data with an MD greater than or equal to the one for the given sample, assuming normally distributed data. The smaller the p-value, the less trustworthy the prediction. For highly non-normal X properties (e.g., fingerprints), the MD p-value is wildly inaccurate.

**Structural Similar Compounds**

| Name               | Anthraquinone, 1,1'-iminodi-                                                                                                                      | Phosphorothioic acid, O-ethyl S-propyl O-(2,4,6-trichlorophenyl) ester                                                                                                         | Aniline, 2,4-bis(o-methylphenoxy)-                                                                                                                |
|--------------------|---------------------------------------------------------------------------------------------------------------------------------------------------|--------------------------------------------------------------------------------------------------------------------------------------------------------------------------------|---------------------------------------------------------------------------------------------------------------------------------------------------|
| Structure          |                                                                                                                                                   |                                                                                                                                                                                |                                                                                                                                                   |
| Actual Endpoint    | Mild                                                                                                                                              | Moderate_Severe                                                                                                                                                                | Mild                                                                                                                                              |
| Predicted Endpoint | Mild                                                                                                                                              | Mild                                                                                                                                                                           | Mild                                                                                                                                              |
| Distance           | 0.669                                                                                                                                             | 0.711                                                                                                                                                                          | 0.733                                                                                                                                             |
| Reference          | 85JCAE "Prehled Prumyslove Toxikologie; Organicke Latky," Marhold, J., Prague, Czechoslovakia, Avicenum, 1986 Volume(issue)/page/year: -,735,1986 | NTIS** National Technical Information Service. (Springfield, VA 22161) Formerly U.S. Clearinghouse for Scientific & Technical Information. Volume(issue)/page/year: OTS0535844 | 85JCAE "Prehled Prumyslove Toxikologie; Organicke Latky," Marhold, J., Prague, Czechoslovakia, Avicenum, 1986 Volume(issue)/page/year: -,725,1986 |

**Model Applicability**

Unknown features are fingerprint features in the query molecule, but not found or appearing too infrequently in the training set.

1. All properties and OPS components are within expected ranges.
2. Unknown FCFP\_2 feature: -332197802: [\*][c]1:[\*]:[\*]:[c](:[\*]):n:1:n:[\*]
3. Unknown FCFP\_2 feature: -1564473960: [\*]:n1:[\*]:[\*]:n:[c]:1:[c](:[\*]):[\*]

**Feature Contribution****Top features for positive contribution**

| Fingerprint | Bit/Smiles | Feature Structure | Score | Moderate_Severe in training set |
|-------------|------------|-------------------|-------|---------------------------------|
|             |            |                   |       |                                 |

|                                               |                   |                                                                                                                                             |              |                                            |
|-----------------------------------------------|-------------------|---------------------------------------------------------------------------------------------------------------------------------------------|--------------|--------------------------------------------|
| FCFP_12                                       | -577707014        | 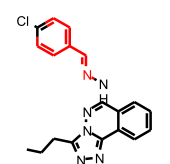<br><chem>[*]N=C([c]1:[cH]:[cH] ):[*]:[cH]:[cH]:1</chem> | 0.717        | 4 out of 4                                 |
| FCFP_12                                       | -2100785893       | <br><chem>[*]N=C([c](:[*]):[*])</chem>                   | 0.552        | 7 out of 10                                |
| FCFP_12                                       | -1151884458       | <br><chem>[*]N([c](:n:[*]):[c](: [*]):[*])</chem>        | 0.385        | 1 out of 1                                 |
| <b>Top Features for negative contribution</b> |                   |                                                                                                                                             |              |                                            |
| <b>Fingerprint</b>                            | <b>Bit/Smiles</b> | <b>Feature Structure</b>                                                                                                                    | <b>Score</b> | <b>Moderate_Severe<br/>in training set</b> |
| FCFP_12                                       | 367998008         | <br><chem>[*]:[cH]:[c](Cl):[cH] :[*]</chem>             | -1.34        | 4 out of 50                                |
| FCFP_12                                       | 551850122         | <br><chem>[*][c]1:[*]:[cH]:[c]( Cl):[cH]:[cH]:1</chem> | -1.27        | 2 out of 27                                |

|         |             |                                                                                                                                      |       |            |
|---------|-------------|--------------------------------------------------------------------------------------------------------------------------------------|-------|------------|
| FCFP_12 | -1508180856 | 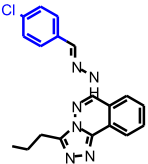<br>[*][c]1:[cH]:[cH]:[c]:[c]<br>(Cl):[cH]:[cH]:1 | -1.26 | 0 out of 7 |
|---------|-------------|--------------------------------------------------------------------------------------------------------------------------------------|-------|------------|

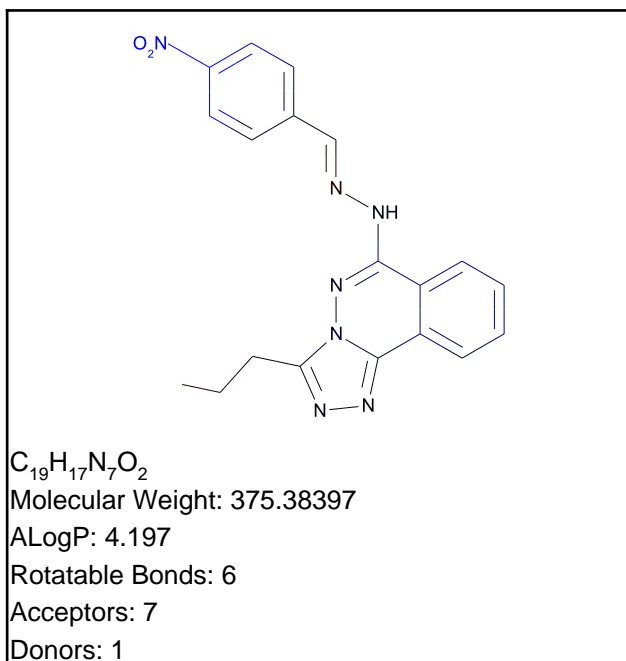

### Model Prediction

Prediction: Mild

Probability: 0.00857

Enrichment: 0.0233

Bayesian Score: -16.3

Mahalanobis Distance: 7.75

Mahalanobis Distance p-value: 0.871

Prediction: Positive if the Bayesian score is above the estimated best cutoff value from minimizing the false positive and false negative rate.

Probability: The estimated probability that the sample is in the positive category. This assumes that the Bayesian score follows a normal distribution and is different from the prediction using a cutoff.

Enrichment: An estimate of enrichment, that is, the increased likelihood (versus random) of this sample being in the category.

Bayesian Score: The standard Laplacian-modified Bayesian score.

Mahalanobis Distance: The Mahalanobis distance (MD) is the distance to the center of the training data. The larger the MD, the less trustworthy the prediction.

Mahalanobis Distance p-value: The p-value gives the fraction of training data with an MD greater than or equal to the one for the given sample, assuming normally distributed data. The smaller the p-value, the less trustworthy the prediction. For highly non-normal X properties (e.g., fingerprints), the MD p-value is wildly inaccurate.

### Structural Similar Compounds

| Name               | Pregna-1,4-diene-3,20-dione, 21-(acetyloxy)-11-hydroxy-6-methyl-17-(1-oxopropoxy)-, (6- $\alpha$ ,11- $\beta$ )-                                                                 | 1,4-Pentadien-3-one, 1,5-bis(p-azidophenyl)-                                                                                                      | Acetic acid, 2-(sec-butyl)-4,6-dinitrophenyl ester                                                                                                |
|--------------------|----------------------------------------------------------------------------------------------------------------------------------------------------------------------------------|---------------------------------------------------------------------------------------------------------------------------------------------------|---------------------------------------------------------------------------------------------------------------------------------------------------|
| Structure          | 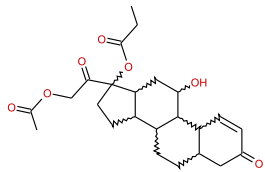                                                                                              |                                                                |                                                                |
| Actual Endpoint    | Mild                                                                                                                                                                             | Mild                                                                                                                                              | Mild                                                                                                                                              |
| Predicted Endpoint | Mild                                                                                                                                                                             | Mild                                                                                                                                              | Mild                                                                                                                                              |
| Distance           | 0.730                                                                                                                                                                            | 0.808                                                                                                                                             | 0.809                                                                                                                                             |
| Reference          | YACHDS Yakuri to Chiryō. Pharmacology and Therapeutics. (Raifu Saiensu Shup pan K.K., 2-5-13, Yaesu, Chuo-ku, Tokyo 104, Japan) V.1-1972- Volume(issue) /page/year: 19,3103,1991 | 85JCAE "Prehled Prumyslove Toxikologie; Organické Latky," Marhold, J., Prague, Czechoslovakia, Avicenum, 1986 Volume(issue)/page/year: -,733,1986 | 85JCAE "Prehled Prumyslove Toxikologie; Organické Latky," Marhold, J., Prague, Czechoslovakia, Avicenum, 1986 Volume(issue)/page/year: -,750,1986 |

### Model Applicability

Unknown features are fingerprint features in the query molecule, but not found or appearing too infrequently in the training set.

1. All properties and OPS components are within expected ranges.
2. Unknown FCFP\_2 feature: -332197802: [\*][c]1:[\*]:[\*]:[c](:[\*]):n:1:n:[\*]
3. Unknown FCFP\_2 feature: -1564473960: [\*]:n1:[\*]:[\*]:n:[c]:1:[c](:[\*]):[\*]

### Feature Contribution

#### Top features for positive contribution

| Fingerprint | Bit/Smiles | Feature Structure | Score | Moderate_Severe in training set |
|-------------|------------|-------------------|-------|---------------------------------|
|             |            |                   |       |                                 |

|                                               |                   |                                                                                                                                                         |              |                                        |
|-----------------------------------------------|-------------------|---------------------------------------------------------------------------------------------------------------------------------------------------------|--------------|----------------------------------------|
| FCFP_12                                       | -577707014        | 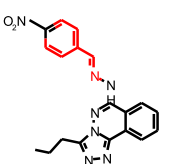<br><chem>[*]N=C([c]1:[cH]:[cH]:[cH]:[cH]:[cH]:1):[*]</chem>         | 0.717        | 4 out of 4                             |
| FCFP_12                                       | -2100785893       | <br><chem>[*]N=C([c](:[*]):[*]):[*]</chem>                           | 0.552        | 7 out of 10                            |
| FCFP_12                                       | -1151884458       | <br><chem>[*]N([c](:n:[*]):[c](:[*]):[*]):[*]</chem>                 | 0.385        | 1 out of 1                             |
| <b>Top Features for negative contribution</b> |                   |                                                                                                                                                         |              |                                        |
| <b>Fingerprint</b>                            | <b>Bit/Smiles</b> | <b>Feature Structure</b>                                                                                                                                | <b>Score</b> | <b>Moderate_Severe in training set</b> |
| FCFP_12                                       | 8                 | <br><chem>[*][N+](=[*])[*]</chem>                                   | -1.6         | 0 out of 11                            |
| FCFP_12                                       | -828984032        | <br><chem>[*][N+](=[*])[c](:[cH]:[cH]:[cH]:[cH]:[cH]:1):[*]</chem> | -1.36        | 0 out of 8                             |



|         |            |                                                                                                                                                                  |       |            |
|---------|------------|------------------------------------------------------------------------------------------------------------------------------------------------------------------|-------|------------|
| FCFP_12 | 1872392852 | 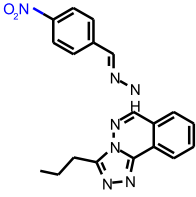<br><chem>CCCC1=NC2=CC=CC=C2N1=NC3=CC=C(C=C3)C=C4C=CC(=C4)[N+](=O)[O-]</chem> | -1.26 | 0 out of 7 |
|---------|------------|------------------------------------------------------------------------------------------------------------------------------------------------------------------|-------|------------|

7a

TOPKAT\_Skin\_Irritancy\_None\_vs\_Irritant

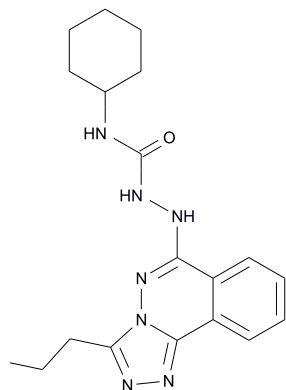C<sub>19</sub>H<sub>25</sub>N<sub>7</sub>O

Molecular Weight: 367.44809

ALogP: 3.681

Rotatable Bonds: 5

Acceptors: 5

Donors: 3

## Model Prediction

Prediction: Non-Irritant

Probability: 0.968

Enrichment: 1.05

Bayesian Score: -1.11

Mahalanobis Distance: 10

Mahalanobis Distance p-value: 0.0583

Prediction: Positive if the Bayesian score is above the estimated best cutoff value from minimizing the false positive and false negative rate.

Probability: The estimated probability that the sample is in the positive category. This assumes that the Bayesian score follows a normal distribution and is different from the prediction using a cutoff.

Enrichment: An estimate of enrichment, that is, the increased likelihood (versus random) of this sample being in the category. Bayesian Score: The standard Laplacian-modified Bayesian score.

Mahalanobis Distance: The Mahalanobis distance (MD) is the distance to the center of the training data. The larger the MD, the less trustworthy the prediction.

Mahalanobis Distance p-value: The p-value gives the fraction of training data with an MD greater than or equal to the one for the given sample, assuming normally distributed data. The smaller the p-value, the less trustworthy the prediction. For highly non-normal X properties (e.g., fingerprints), the MD p-value is wildly inaccurate.

## Structural Similar Compounds

| Name               | 5-Norbornene-2,3-dicarboxylic acid, 1,4,5,6,7,7-hexachloro-                                                                                       | 1-Amino-2-bromo-4-hydroxyanthraquinone | 8-Methylamino-4-hydroxy-2-naphthalene sulfonic acid |
|--------------------|---------------------------------------------------------------------------------------------------------------------------------------------------|----------------------------------------|-----------------------------------------------------|
| Structure          |                                                                                                                                                   |                                        |                                                     |
| Actual Endpoint    | Irritant                                                                                                                                          | Non-Irritant                           | Non-Irritant                                        |
| Predicted Endpoint | Irritant                                                                                                                                          | Non-Irritant                           | Non-Irritant                                        |
| Distance           | 0.796                                                                                                                                             | 0.840                                  | 0.844                                               |
| Reference          | 85JCAE "Prehled Prumyslove Toxikologie; Organicke Latky," Marhold, J., Prague, Czechoslovakia, Avicenum, 1986 Volume(issue)/page/year: -,581,1986 | 28ZPAK -,83,72                         | 28ZPAK -,190,72                                     |

## Model Applicability

Unknown features are fingerprint features in the query molecule, but not found or appearing too infrequently in the training set.

- All properties and OPS components are within expected ranges.
- Unknown FCFP<sub>2</sub> feature: -332197802: [\*][c]1:[\*]:[\*]:[c]([\*]):n:1:n:[\*]

## Feature Contribution

### Top features for positive contribution

| Fingerprint | Bit/Smiles | Feature Structure | Score | Irritant in training set |
|-------------|------------|-------------------|-------|--------------------------|
|             |            |                   |       |                          |

|                                               |                   |                                                                                                                                                     |              |                                 |
|-----------------------------------------------|-------------------|-----------------------------------------------------------------------------------------------------------------------------------------------------|--------------|---------------------------------|
| FCFP_12                                       | 4427049           | 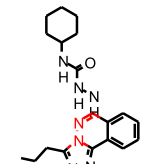<br><chem>[*][c](:[*]):n:n(:[*]):[*]</chem>                      | 0.0734       | 5 out of 5                      |
| FCFP_12                                       | -796673622        | <br><chem>[*]c(=*)NC1CC[*]CC1</chem>                             | 0.0658       | 3 out of 3                      |
| FCFP_12                                       | 1499521844        | <br><chem>[*]NC(=O)N[*]</chem>                                   | 0.0658       | 3 out of 3                      |
| <b>Top Features for negative contribution</b> |                   |                                                                                                                                                     |              |                                 |
| <b>Fingerprint</b>                            | <b>Bit/Smiles</b> | <b>Feature Structure</b>                                                                                                                            | <b>Score</b> | <b>Irritant in training set</b> |
| FCFP_12                                       | 1294344583        | <br><chem>[*]NN[c](:[*]):[*]</chem>                             | -0.65        | 0 out of 1                      |
| FCFP_12                                       | -1320007763       | <br><chem>[*][c](:[*]):[c]:[cH]:[cH]:[cH]:[*]:[c]:1:[*]</chem> | -0.0893      | 20 out of 24                    |

|         |            |                                                                                                                    |         |                |
|---------|------------|--------------------------------------------------------------------------------------------------------------------|---------|----------------|
| FCFP_12 | 1618154665 | <br>[*]:[cH]:[cH]:[cH]:[*]<br>] | -0.0845 | 412 out of 490 |
|---------|------------|--------------------------------------------------------------------------------------------------------------------|---------|----------------|

7b

TOPKAT\_Skin\_Irritancy\_None\_vs\_Irritant

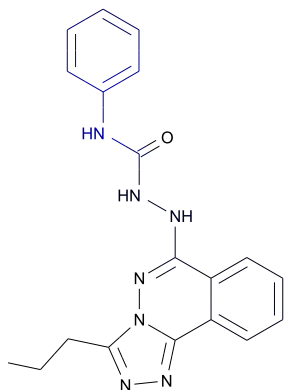C<sub>19</sub>H<sub>19</sub>N<sub>7</sub>O

Molecular Weight: 361.40046

ALogP: 3.399

Rotatable Bonds: 5

Acceptors: 5

Donors: 3

## Model Prediction

Prediction: Non-Irritant

Probability: 0.576

Enrichment: 0.625

Bayesian Score: -4.34

Mahalanobis Distance: 7.03

Mahalanobis Distance p-value: 0.996

Prediction: Positive if the Bayesian score is above the estimated best cutoff value from minimizing the false positive and false negative rate.

Probability: The estimated probability that the sample is in the positive category. This assumes that the Bayesian score follows a normal distribution and is different from the prediction using a cutoff.

Enrichment: An estimate of enrichment, that is, the increased likelihood (versus random) of this sample being in the category.

Bayesian Score: The standard Laplacian-modified Bayesian score.

Mahalanobis Distance: The Mahalanobis distance (MD) is the distance to the center of the training data. The larger the MD, the less trustworthy the prediction.

Mahalanobis Distance p-value: The p-value gives the fraction of training data with an MD greater than or equal to the one for the given sample, assuming normally distributed data. The smaller the p-value, the less trustworthy the prediction. For highly non-normal X properties (e.g., fingerprints), the MD p-value is wildly inaccurate.

## Structural Similar Compounds

| Name               | 5-Norbornene-2,3-dicarboxylic acid, 1,4,5,6,7,7-hexachloro-                                                                                       | 8-Methylamino-4-hydroxy-2-naphthalene sulfonic acid | p-Acetophenetidine, 3'-(bis(2-hydroxyethyl)amino)- |
|--------------------|---------------------------------------------------------------------------------------------------------------------------------------------------|-----------------------------------------------------|----------------------------------------------------|
| Structure          |                                                                                                                                                   |                                                     |                                                    |
| Actual Endpoint    | Irritant                                                                                                                                          | Non-Irritant                                        | Non-Irritant                                       |
| Predicted Endpoint | Irritant                                                                                                                                          | Non-Irritant                                        | Non-Irritant                                       |
| Distance           | 0.790                                                                                                                                             | 0.805                                               | 0.817                                              |
| Reference          | 85JCAE "Prehled Prumyslove Toxikologie; Organicke Latky," Marhold, J., Prague, Czechoslovakia, Avicenum, 1986 Volume(issue)/page/year: -,581,1986 | 28ZPAK -,190,72                                     | 28ZPAK -,100,72                                    |

## Model Applicability

Unknown features are fingerprint features in the query molecule, but not found or appearing too infrequently in the training set.

1. All properties and OPS components are within expected ranges.
2. Unknown FCFP\_2 feature: -332197802: [\*][c]1:[\*]:[\*]:[c]([\*]):n:1:n:[\*]

## Feature Contribution

### Top features for positive contribution

| Fingerprint | Bit/Smiles | Feature Structure | Score | Irritant in training set |
|-------------|------------|-------------------|-------|--------------------------|
|             |            |                   |       |                          |

|                                               |                   |                                                                                                                                       |              |                                 |
|-----------------------------------------------|-------------------|---------------------------------------------------------------------------------------------------------------------------------------|--------------|---------------------------------|
| FCFP_12                                       | 4427049           | 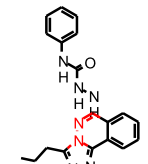<br>[*][c](:[*]):n:n(:[*])<br>):[*]                | 0.0734       | 5 out of 5                      |
| FCFP_12                                       | 1499521844        | <br>[*]NC(=O)N[*]                                  | 0.0658       | 3 out of 3                      |
| FCFP_12                                       | -1578026142       | <br>[*]:c](:[*])CCC                                | 0.0583       | 2 out of 2                      |
| <b>Top Features for negative contribution</b> |                   |                                                                                                                                       |              |                                 |
| <b>Fingerprint</b>                            | <b>Bit/Smiles</b> | <b>Feature Structure</b>                                                                                                              | <b>Score</b> | <b>Irritant in training set</b> |
| FCFP_12                                       | -1838187238       | <br>[*]C(=[*])N[c]1:[cH]:<br>[cH]:[*]:[cH]:[cH]:1 | -0.692       | 5 out of 12                     |
| FCFP_12                                       | 1294344583        | <br>[*]NN[c](:[*]):[*]                           | -0.65        | 0 out of 1                      |

|         |            |                                                                                                                                                                               |       |            |
|---------|------------|-------------------------------------------------------------------------------------------------------------------------------------------------------------------------------|-------|------------|
| FCFP_12 | -792685140 | 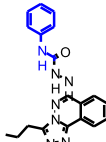 <p data-bbox="1255 256 1423 321">[*]C(=[*])N[c]1.[cH]:<br/>[cH]:[cH]:[cH]:[cH]:<br/>1</p> | -0.65 | 0 out of 1 |
|---------|------------|-------------------------------------------------------------------------------------------------------------------------------------------------------------------------------|-------|------------|

8a

TOPKAT\_Skin\_Irritancy\_None\_vs\_Irritant

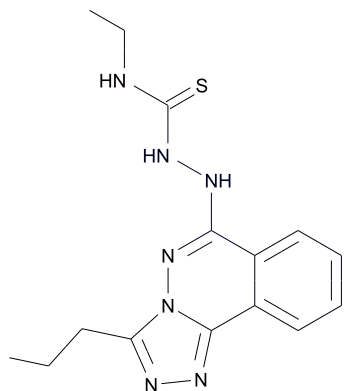C<sub>15</sub>H<sub>19</sub>N<sub>7</sub>S

Molecular Weight: 329.42325

ALogP: 3.388

Rotatable Bonds: 7

Acceptors: 5

Donors: 3

## Model Prediction

Prediction: Non-Irritant

Probability: 0.967

Enrichment: 1.05

Bayesian Score: -1.2

Mahalanobis Distance: 8.05

Mahalanobis Distance p-value: 0.87

Prediction: Positive if the Bayesian score is above the estimated best cutoff value from minimizing the false positive and false negative rate.

Probability: The estimated probability that the sample is in the positive category. This assumes that the Bayesian score follows a normal distribution and is different from the prediction using a cutoff.

Enrichment: An estimate of enrichment, that is, the increased likelihood (versus random) of this sample being in the category. Bayesian Score: The standard Laplacian-modified Bayesian score.

Mahalanobis Distance: The Mahalanobis distance (MD) is the distance to the center of the training data. The larger the MD, the less trustworthy the prediction.

Mahalanobis Distance p-value: The p-value gives the fraction of training data with an MD greater than or equal to the one for the given sample, assuming normally distributed data. The smaller the p-value, the less trustworthy the prediction. For highly non-normal X properties (e.g., fingerprints), the MD p-value is wildly inaccurate.

## Structural Similar Compounds

| Name               | Benzenesulfonic acid, 2-anilino-5-nitro-                                                                                                           | 8-Methylamino-4-hydroxy-2-naphthalene sulfonic acid | C.I. Fluorescent Brightening Agent 24                                                                     |
|--------------------|----------------------------------------------------------------------------------------------------------------------------------------------------|-----------------------------------------------------|-----------------------------------------------------------------------------------------------------------|
| Structure          |                                                                                                                                                    |                                                     |                                                                                                           |
| Actual Endpoint    | Irritant                                                                                                                                           | Non-Irritant                                        | Irritant                                                                                                  |
| Predicted Endpoint | Non-Irritant                                                                                                                                       | Non-Irritant                                        | Non-Irritant                                                                                              |
| Distance           | 0.793                                                                                                                                              | 0.802                                               | 0.817                                                                                                     |
| Reference          | 85JCAE "Prehled Prumyslove Toxikologie; Organicke Latky," Marhold, J., Prague, Czechoslovakia, Avicenum, 1986 Volume(issue)/page/year: -,1061,1986 | 28ZPAK -,190,72                                     | MVCRB3 MVC-Report. (Stockholm, Sweden) No.1-2, 1972-73. Discontinued. Volume(issue)/page/year: 2,193,1973 |

## Model Applicability

Unknown features are fingerprint features in the query molecule, but not found or appearing too infrequently in the training set.

1. All properties and OPS components are within expected ranges.
2. Unknown FCFP\_2 feature: -332197802: [\*][c]1:[\*]:[\*]:[c]([\*]):n:1:n:[\*]

## Feature Contribution

### Top features for positive contribution

| Fingerprint | Bit/Smiles | Feature Structure | Score | Irritant in training set |
|-------------|------------|-------------------|-------|--------------------------|
|             |            |                   |       |                          |



|                                               |                   |                                                                                                                                                  |              |                                 |
|-----------------------------------------------|-------------------|--------------------------------------------------------------------------------------------------------------------------------------------------|--------------|---------------------------------|
| FCFP_12                                       | 4427049           | 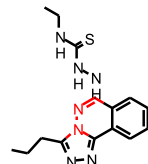<br>[*][c](:[*]):n(:[*])<br>):[*]                             | 0.0734       | 5 out of 5                      |
| FCFP_12                                       | -1939253119       | <br>[*]C(=[*])NCC                                             | 0.0658       | 3 out of 3                      |
| FCFP_12                                       | 1499521844        | <br>[*]NC(=O)N[*]                                             | 0.0658       | 3 out of 3                      |
| <b>Top Features for negative contribution</b> |                   |                                                                                                                                                  |              |                                 |
| <b>Fingerprint</b>                            | <b>Bit/Smiles</b> | <b>Feature Structure</b>                                                                                                                         | <b>Score</b> | <b>Irritant in training set</b> |
| FCFP_12                                       | 1294344583        | <br>[*]NN[c](:[*]):[*]                                       | -0.65        | 0 out of 1                      |
| FCFP_12                                       | -1320007763       | <br>[*][c](:[*]):[c]†:[cH]<br>]:[cH]:[cH]:[*]:[c]:<br>1:[*] | -0.0893      | 20 out of 24                    |

|         |            |                                                                                                                    |         |                |
|---------|------------|--------------------------------------------------------------------------------------------------------------------|---------|----------------|
| FCFP_12 | 1618154665 | 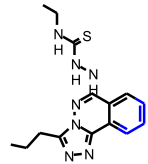<br>[*]:[cH]:[cH]:[cH]:[*]<br>] | -0.0845 | 412 out of 490 |
|---------|------------|--------------------------------------------------------------------------------------------------------------------|---------|----------------|

8b

TOPKAT\_Skin\_Irritancy\_None\_vs\_Irritant

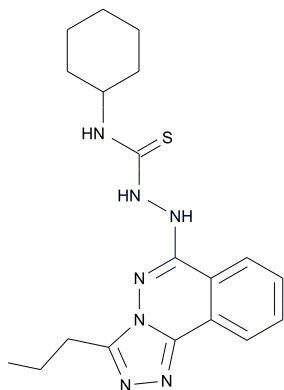C<sub>19</sub>H<sub>25</sub>N<sub>7</sub>S

Molecular Weight: 383.51369

ALogP: 4.898

Rotatable Bonds: 7

Acceptors: 5

Donors: 3

## Model Prediction

Prediction: Non-Irritant

Probability: 0.968

Enrichment: 1.05

Bayesian Score: -1.16

Mahalanobis Distance: 10.1

Mahalanobis Distance p-value: 0.0523

Prediction: Positive if the Bayesian score is above the estimated best cutoff value from minimizing the false positive and false negative rate.

Probability: The estimated probability that the sample is in the positive category. This assumes that the Bayesian score follows a normal distribution and is different from the prediction using a cutoff.

Enrichment: An estimate of enrichment, that is, the increased likelihood (versus random) of this sample being in the category.

Bayesian Score: The standard Laplacian-modified Bayesian score.

Mahalanobis Distance: The Mahalanobis distance (MD) is the distance to the center of the training data. The larger the MD, the less trustworthy the prediction.

Mahalanobis Distance p-value: The p-value gives the fraction of training data with an MD greater than or equal to the one for the given sample, assuming normally distributed data. The smaller the p-value, the less trustworthy the prediction. For highly non-normal X properties (e.g., fingerprints), the MD p-value is wildly inaccurate.

## Structural Similar Compounds

| Name               | Benzenesulfonic acid, 2,2'-(4,4'-biphenylylene)d i-, disodium salt                                        | Urea, 1,3-bis(2-benzothiazolylthiomethyl) -                                                                                                                                     | Benzenesulfonic acid, 2-anilino-5-nitro-                                                                                                            |
|--------------------|-----------------------------------------------------------------------------------------------------------|---------------------------------------------------------------------------------------------------------------------------------------------------------------------------------|-----------------------------------------------------------------------------------------------------------------------------------------------------|
| Structure          |                                                                                                           |                                                                                                                                                                                 |                                                                                                                                                     |
| Actual Endpoint    | Irritant                                                                                                  | Irritant                                                                                                                                                                        | Irritant                                                                                                                                            |
| Predicted Endpoint | Non-Irritant                                                                                              | Irritant                                                                                                                                                                        | Non-Irritant                                                                                                                                        |
| Distance           | 0.858                                                                                                     | 0.910                                                                                                                                                                           | 0.911                                                                                                                                               |
| Reference          | MVCRB3 MVC-Report. (Stockholm, Sweden) No.1-2, 1972-73. Discontinued. Volume(issue)/page/year: 2,193,1973 | AMIHBC AMA Archives of Industrial Hygiene and Occupational Medicine. (Chicago , IL) V.2-10, 1950-54. For publisher information, see AEHLAU. Volume(issue)/page/year: 5,311,1952 | 85JCAE "Prehled Prumyslove Toxikologie; Organické Latky," Marhold, J., Prague , Czechoslovakia, Avicenum, 1986 Volume(issue)/page/year: -,1061,1986 |

## Model Applicability

Unknown features are fingerprint features in the query molecule, but not found or appearing too infrequently in the training set.

1. All properties and OPS components are within expected ranges.
2. Unknown FCFP\_2 feature: -332197802: [\*][c]1:[\*]:[\*]:[c](:[\*]):n:1:n:[\*]

## Feature Contribution

### Top features for positive contribution

| Fingerprint | Bit/Smiles | Feature Structure | Score | Irritant in training set |
|-------------|------------|-------------------|-------|--------------------------|
|             |            |                   |       |                          |

|                                               |                   |                                                                                                                                        |              |                                 |
|-----------------------------------------------|-------------------|----------------------------------------------------------------------------------------------------------------------------------------|--------------|---------------------------------|
| FCFP_12                                       | 4427049           | 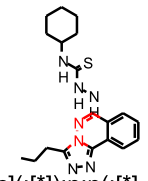<br>[*][c](:[*]):n:n(:[*]):[*]                      | 0.0734       | 5 out of 5                      |
| FCFP_12                                       | -796673622        | <br>[*]c(=*)NC1CC[*]CC1                             | 0.0658       | 3 out of 3                      |
| FCFP_12                                       | 1499521844        | <br>[*]NC(=O)N[*]                                   | 0.0658       | 3 out of 3                      |
| <b>Top Features for negative contribution</b> |                   |                                                                                                                                        |              |                                 |
| <b>Fingerprint</b>                            | <b>Bit/Smiles</b> | <b>Feature Structure</b>                                                                                                               | <b>Score</b> | <b>Irritant in training set</b> |
| FCFP_12                                       | 1294344583        | <br>[*]NN[c](:[*]):[*]                             | -0.65        | 0 out of 1                      |
| FCFP_12                                       | -1320007763       | <br>[*][c](:[*]):[c]:[cH]:[cH]:[cH]:[*]:[c]:1:[*] | -0.0893      | 20 out of 24                    |

|         |            |                                                                                                                                                       |         |                |
|---------|------------|-------------------------------------------------------------------------------------------------------------------------------------------------------|---------|----------------|
| FCFP_12 | 1618154665 |  <p data-bbox="1260 276 1417 324">[*]:[cH]:[cH]:[cH]:[*]<br/>]</p> | -0.0845 | 412 out of 490 |
|---------|------------|-------------------------------------------------------------------------------------------------------------------------------------------------------|---------|----------------|

9a

TOPKAT\_Skin\_Irritancy\_None\_vs\_Irritant

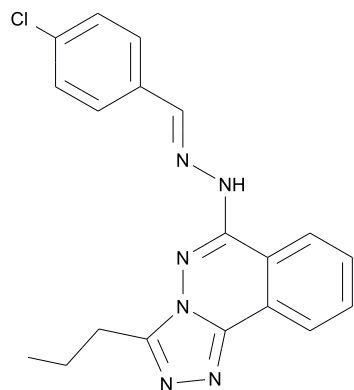

$C_{19}H_{17}ClN_6$   
 Molecular Weight: 364.83147  
 ALogP: 4.967  
 Rotatable Bonds: 5  
 Acceptors: 5  
 Donors: 1

### Model Prediction

**Prediction: Irritant**

Probability: 0.974

Enrichment: 1.06

Bayesian Score: -0.717

Mahalanobis Distance: 8.11

Mahalanobis Distance p-value: 0.849

Prediction: Positive if the Bayesian score is above the estimated best cutoff value from minimizing the false positive and false negative rate.

Probability: The estimated probability that the sample is in the positive category. This assumes that the Bayesian score follows a normal distribution and is different from the prediction using a cutoff.

Enrichment: An estimate of enrichment, that is, the increased likelihood (versus random) of this sample being in the category.

Bayesian Score: The standard Laplacian-modified Bayesian score.

Mahalanobis Distance: The Mahalanobis distance (MD) is the distance to the center of the training data. The larger the MD, the less trustworthy the prediction.

Mahalanobis Distance p-value: The p-value gives the fraction of training data with an MD greater than or equal to the one for the given sample, assuming normally distributed data. The smaller the p-value, the less trustworthy the prediction. For highly non-normal X properties (e.g., fingerprints), the MD p-value is wildly inaccurate.

### Structural Similar Compounds

| Name               | 1-Piperazineacetic acid, 4-(2-hydroxyethyl)-alpha-phenyl-, 2,6-dichlorophenyl ester, monohydrochloride                                                           | Anthraquinone, 1,1'-iminodi-                                                                                                                      | Phosphorothioic acid, O-ethyl S-propyl O-(2,4,6-trichlorophenyl) ester                                                                                                         |
|--------------------|------------------------------------------------------------------------------------------------------------------------------------------------------------------|---------------------------------------------------------------------------------------------------------------------------------------------------|--------------------------------------------------------------------------------------------------------------------------------------------------------------------------------|
| Structure          |                                                                                                                                                                  |                                                                                                                                                   |                                                                                                                                                                                |
| Actual Endpoint    | Irritant                                                                                                                                                         | Irritant                                                                                                                                          | Irritant                                                                                                                                                                       |
| Predicted Endpoint | Irritant                                                                                                                                                         | Non-Irritant                                                                                                                                      | Irritant                                                                                                                                                                       |
| Distance           | 0.674                                                                                                                                                            | 0.675                                                                                                                                             | 0.707                                                                                                                                                                          |
| Reference          | BCFAAI Bollettino Chimico Farmaceutico. (Societa Editoriale Farmaceutica, Via Ausonio 12, 20123 Milan, Italy) V.33- 1894- Volume(issue)/page/year: 107,3 10,1968 | 85JCAE "Prehled Prumyslove Toxikologie; Organické Latky," Marhold, J., Prague, Czechoslovakia, Avicenum, 1986 Volume(issue)/page/year: -,735,1986 | NTIS** National Technical Information Service. (Springfield, VA 22161) Formerly U.S. Clearinghouse for Scientific & Technical Information. Volume(issue)/page/year: OTS0535844 |

### Model Applicability

Unknown features are fingerprint features in the query molecule, but not found or appearing too infrequently in the training set.

- All properties and OPS components are within expected ranges.
- Unknown FCFP\_2 feature: -332197802: [\*][c]1:[\*]:[\*]:[c]([\*]):n:1:n:[\*]

### Feature Contribution

#### Top features for positive contribution

| Fingerprint | Bit/Smiles | Feature Structure | Score | Irritant in training set |
|-------------|------------|-------------------|-------|--------------------------|
|             |            |                   |       |                          |

|                                               |                   |                                                                                                                                                          |              |                                 |
|-----------------------------------------------|-------------------|----------------------------------------------------------------------------------------------------------------------------------------------------------|--------------|---------------------------------|
| FCFP_12                                       | -2100785893       | 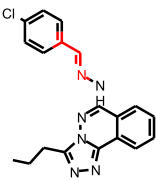<br><chem>[*]N=C(c(:[*]):[*])</chem>                                  | 0.081        | 11 out of 11                    |
| FCFP_12                                       | -577707014        | <br><chem>[*]N=C(c1:[cH]:[cH]:[cH]:[cH]:[cH]:1)[*]:[cH]:[cH]:1</chem> | 0.0734       | 5 out of 5                      |
| FCFP_12                                       | 4427049           | <br><chem>[*][c(:[*]):n:n(:[*]):[*])</chem>                           | 0.0734       | 5 out of 5                      |
| <b>Top Features for negative contribution</b> |                   |                                                                                                                                                          |              |                                 |
| <b>Fingerprint</b>                            | <b>Bit/Smiles</b> | <b>Feature Structure</b>                                                                                                                                 | <b>Score</b> | <b>Irritant in training set</b> |
| FCFP_12                                       | 367998008         | <br><chem>[*]:[cH]:[c](Cl):[cH]:[*]</chem>                           | -0.129       | 61 out of 76                    |
| FCFP_12                                       | -1508180856       | <br><chem>[*][c1:[cH]:[cH]:[c](Cl):[cH]:[cH]:1</chem>               | -0.125       | 12 out of 15                    |

|         |          |                                                                                                                                          |       |              |
|---------|----------|------------------------------------------------------------------------------------------------------------------------------------------|-------|--------------|
| FCFP_12 | 71476542 | 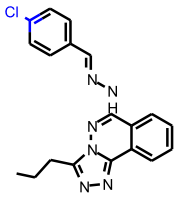 <p data-bbox="1287 310 1413 337">[*]:[c](:[*])Cl</p> | -0.12 | 64 out of 79 |
|---------|----------|------------------------------------------------------------------------------------------------------------------------------------------|-------|--------------|





|                                               |                   |                                                                                                                                                             |              |                                 |
|-----------------------------------------------|-------------------|-------------------------------------------------------------------------------------------------------------------------------------------------------------|--------------|---------------------------------|
| FCFP_12                                       | -2100785893       | 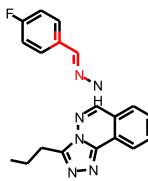<br><chem>[*]N=C(c(:[*]):[*])</chem>                                     | 0.081        | 11 out of 11                    |
| FCFP_12                                       | 4427049           | <br><chem>[*][c(:[*]):n:n(:[*])</chem><br><chem>):[*]</chem>             | 0.0734       | 5 out of 5                      |
| FCFP_12                                       | -577707014        | <br><chem>[*]N=C(c1:[cH]:[cH</chem><br><chem>]:[*]:[cH]:[cH]:1</chem>    | 0.0734       | 5 out of 5                      |
| <b>Top Features for negative contribution</b> |                   |                                                                                                                                                             |              |                                 |
| <b>Fingerprint</b>                            | <b>Bit/Smiles</b> | <b>Feature Structure</b>                                                                                                                                    | <b>Score</b> | <b>Irritant in training set</b> |
| FCFP_12                                       | 367998008         | <br><chem>[*]:[cH]:[c](Cl):[cH</chem><br><chem>]:[*]</chem>             | -0.129       | 61 out of 76                    |
| FCFP_12                                       | -1508180856       | <br><chem>[*][c]1:[cH]:[cH]:[c</chem><br><chem>(Cl):[cH]:[cH]:1</chem> | -0.125       | 12 out of 15                    |

|         |          |                                                                                                                     |       |              |
|---------|----------|---------------------------------------------------------------------------------------------------------------------|-------|--------------|
| FCFP_12 | 71476542 | 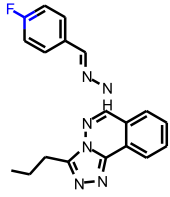<br><chem>[*]:[c](:[*])Cl</chem> | -0.12 | 64 out of 79 |
|---------|----------|---------------------------------------------------------------------------------------------------------------------|-------|--------------|

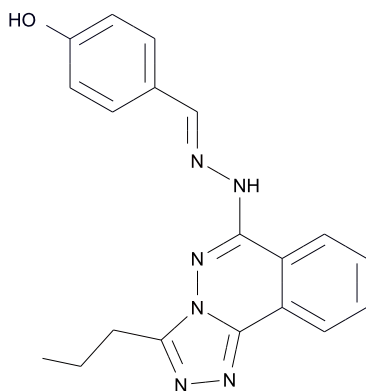

$C_{19}H_{18}N_6O$

Molecular Weight: 346.38582

ALogP: 4.061

Rotatable Bonds: 5

Acceptors: 6

Donors: 2

## Model Prediction

Prediction: Non-Irritant

Probability: 0.966

Enrichment: 1.05

Bayesian Score: -1.24

Mahalanobis Distance: 8.51

Mahalanobis Distance p-value: 0.685

Prediction: Positive if the Bayesian score is above the estimated best cutoff value from minimizing the false positive and false negative rate.

Probability: The estimated probability that the sample is in the positive category. This assumes that the Bayesian score follows a normal distribution and is different from the prediction using a cutoff.

Enrichment: An estimate of enrichment, that is, the increased likelihood (versus random) of this sample being in the category. Bayesian Score: The standard Laplacian-modified Bayesian score.

Mahalanobis Distance: The Mahalanobis distance (MD) is the distance to the center of the training data. The larger the MD, the less trustworthy the prediction.

Mahalanobis Distance p-value: The p-value gives the fraction of training data with an MD greater than or equal to the one for the given sample, assuming normally distributed data. The smaller the p-value, the less trustworthy the prediction. For highly non-normal X properties (e.g., fingerprints), the MD p-value is wildly inaccurate.

## Structural Similar Compounds

| Name               | 5-Norbornene-2,3-dicarboxylic acid, 1,4,5,6,7,7-hexachloro-                                                                                       | 1-Amino-2-bromo-4-hydroxyanthraquinone | Phenol, 4,4'-sulfonyldi-                                                                                                                              |
|--------------------|---------------------------------------------------------------------------------------------------------------------------------------------------|----------------------------------------|-------------------------------------------------------------------------------------------------------------------------------------------------------|
| Structure          |                                                                                                                                                   |                                        |                                                                                                                                                       |
| Actual Endpoint    | Irritant                                                                                                                                          | Non-Irritant                           | Irritant                                                                                                                                              |
| Predicted Endpoint | Irritant                                                                                                                                          | Non-Irritant                           | Non-Irritant                                                                                                                                          |
| Distance           | 0.786                                                                                                                                             | 0.802                                  | 0.809                                                                                                                                                 |
| Reference          | 85JCAE "Prehled Prumyslove Toxikologie; Organicke Latky," Marhold, J., Prague, Czechoslovakia, Avicenum, 1986 Volume(issue)/page/year: -,581,1986 | 28ZPAK -,83,72                         | BIOFX* BIOFAX Industrial Bio-Test Laboratories, Inc., Data Sheets. (1810 Fro ntage Rd., Northbrook, IL 60062) Volume(issue)/page/year: 601-05501,1974 |

## Model Applicability

Unknown features are fingerprint features in the query molecule, but not found or appearing too infrequently in the training set.

1. All properties and OPS components are within expected ranges.
2. Unknown FCFP\_2 feature: -332197802: [\*][c]1:[\*]:[\*]:[c](:[\*]):n:1:n:[\*]

## Feature Contribution

### Top features for positive contribution

| Fingerprint | Bit/Smiles | Feature Structure | Score | Irritant in training set |
|-------------|------------|-------------------|-------|--------------------------|
|             |            |                   |       |                          |

|                                               |                   |                                                                                                                                          |              |                                 |
|-----------------------------------------------|-------------------|------------------------------------------------------------------------------------------------------------------------------------------|--------------|---------------------------------|
| FCFP_12                                       | -2100785893       | 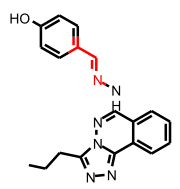<br><chem>[*]N=C(c(:[*]):[*])</chem>                  | 0.081        | 11 out of 11                    |
| FCFP_12                                       | 4427049           | <br><chem>[*][c(:[*]):n:n(:[*])]:[*]</chem>           | 0.0734       | 5 out of 5                      |
| FCFP_12                                       | -577707014        | <br><chem>[*]N=C(c1:c[H]:[cH]:[cH]:[cH]:1):[*]</chem> | 0.0734       | 5 out of 5                      |
| <b>Top Features for negative contribution</b> |                   |                                                                                                                                          |              |                                 |
| <b>Fingerprint</b>                            | <b>Bit/Smiles</b> | <b>Feature Structure</b>                                                                                                                 | <b>Score</b> | <b>Irritant in training set</b> |
| FCFP_12                                       | 7                 | <br><chem>[*]O</chem>                                | -0.118       | 104 out of 128                  |
| FCFP_12                                       | -549108873        | <br><chem>[*]:c(:[*])O</chem>                       | -0.11        | 54 out of 66                    |

|         |          |                                                                                                                                                        |       |              |
|---------|----------|--------------------------------------------------------------------------------------------------------------------------------------------------------|-------|--------------|
| FCFP_12 | 74595001 | 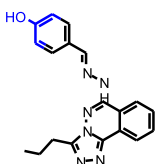 <p data-bbox="1260 276 1417 332">[*]:[cH]:[c](O):[cH]:<br/>[*]</p> | -0.11 | 54 out of 66 |
|---------|----------|--------------------------------------------------------------------------------------------------------------------------------------------------------|-------|--------------|

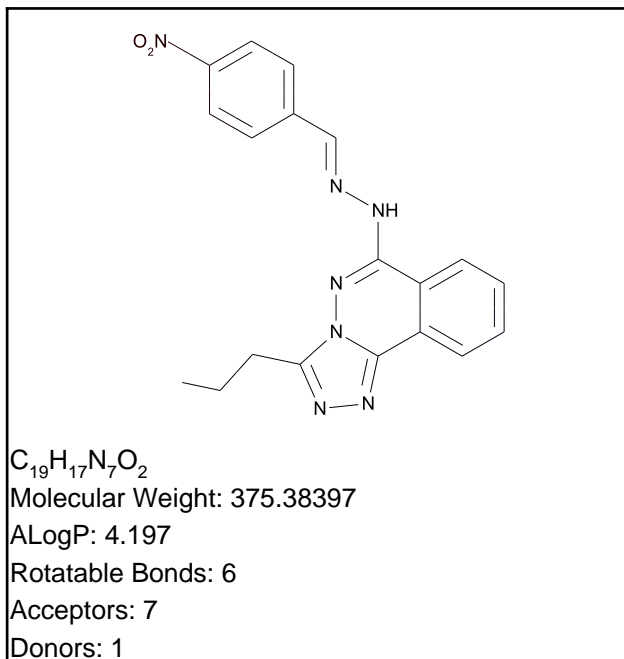

### Model Prediction

**Prediction: Irritant**

Probability: 0.996

Enrichment: 1.08

Bayesian Score: 0.207

Mahalanobis Distance: 7.65

Mahalanobis Distance p-value: 0.955

Prediction: Positive if the Bayesian score is above the estimated best cutoff value from minimizing the false positive and false negative rate.

Probability: The estimated probability that the sample is in the positive category. This assumes that the Bayesian score follows a normal distribution and is different from the prediction using a cutoff.

Enrichment: An estimate of enrichment, that is, the increased likelihood (versus random) of this sample being in the category.

Bayesian Score: The standard Laplacian-modified Bayesian score.

Mahalanobis Distance: The Mahalanobis distance (MD) is the distance to the center of the training data. The larger the MD, the less trustworthy the prediction.

Mahalanobis Distance p-value: The p-value gives the fraction of training data with an MD greater than or equal to the one for the given sample, assuming normally distributed data. The smaller the p-value, the less trustworthy the prediction. For highly non-normal X properties (e.g., fingerprints), the MD p-value is wildly inaccurate.

### Structural Similar Compounds

| Name               | Pregna-1,4-diene-3,20-dione, 21-(acetyloxy)-11-hydroxy-6-methyl-17- (1-oxopropoxy)-, (6-alpha,11-beta)-                                                                          | Acetic acid, 2-(sec-butyl)-4,6-dinitrophenyl ester                                                                                                | 1,4-Pentadien-3-one, 1,5-bis(p-azidophenyl)-                                                                                                      |
|--------------------|----------------------------------------------------------------------------------------------------------------------------------------------------------------------------------|---------------------------------------------------------------------------------------------------------------------------------------------------|---------------------------------------------------------------------------------------------------------------------------------------------------|
| Structure          | 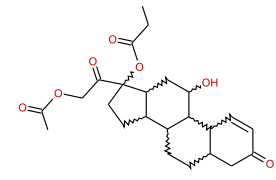                                                                                              |                                                                |                                                                |
| Actual Endpoint    | Irritant                                                                                                                                                                         | Irritant                                                                                                                                          | Irritant                                                                                                                                          |
| Predicted Endpoint | Irritant                                                                                                                                                                         | Non-Irritant                                                                                                                                      | Irritant                                                                                                                                          |
| Distance           | 0.735                                                                                                                                                                            | 0.809                                                                                                                                             | 0.810                                                                                                                                             |
| Reference          | YACHDS Yakuri to Chiryō. Pharmacology and Therapeutics. (Raifu Saiensu Shup pan K.K., 2-5-13, Yaesu, Chuo-ku, Tokyo 104, Japan) V.1-1972- Volume(issue) /page/year: 19,3103,1991 | 85JCAE "Prehled Prumyslove Toxikologie; Organické Latky," Marhold, J., Prague, Czechoslovakia, Avicenum, 1986 Volume(issue)/page/year: -,750,1986 | 85JCAE "Prehled Prumyslove Toxikologie; Organické Latky," Marhold, J., Prague, Czechoslovakia, Avicenum, 1986 Volume(issue)/page/year: -,733,1986 |

### Model Applicability

Unknown features are fingerprint features in the query molecule, but not found or appearing too infrequently in the training set.

- All properties and OPS components are within expected ranges.
- Unknown FCFP\_2 feature: -332197802: [\*][c]1:[\*]:[\*]:[c]([\*]):n:1:n:[\*]

### Feature Contribution

#### Top features for positive contribution

| Fingerprint | Bit/Smiles | Feature Structure | Score | Irritant in training set |
|-------------|------------|-------------------|-------|--------------------------|
|             |            |                   |       |                          |

|                                               |                   |                                                                                                                                                |              |                                 |
|-----------------------------------------------|-------------------|------------------------------------------------------------------------------------------------------------------------------------------------|--------------|---------------------------------|
| FCFP_12                                       | 5                 | 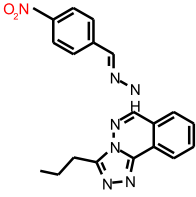<br>[*][O-]                                                 | 0.0854       | 27 out of 27                    |
| FCFP_12                                       | 8                 | <br>[*][N+](=[*])[*]                                        | 0.0843       | 20 out of 20                    |
| FCFP_12                                       | -2100785893       | <br>[*]\N=C\c(:[*]):[*]                                     | 0.081        | 11 out of 11                    |
| <b>Top Features for negative contribution</b> |                   |                                                                                                                                                |              |                                 |
| <b>Fingerprint</b>                            | <b>Bit/Smiles</b> | <b>Feature Structure</b>                                                                                                                       | <b>Score</b> | <b>Irritant in training set</b> |
| FCFP_12                                       | -1320007763       | <br>[*][c](:[*]):[c]*[c]H<br>]:[cH]:[cH]:[*]:[c]:<br>1:[*] | -0.0893      | 20 out of 24                    |
| FCFP_12                                       | 1618154665        | <br>[*]:[cH]:[cH]:[cH]:[*]<br>]                           | -0.0845      | 412 out of 490                  |



|         |    |                                                                                                     |         |                |
|---------|----|-----------------------------------------------------------------------------------------------------|---------|----------------|
| FCFP_12 | 16 | 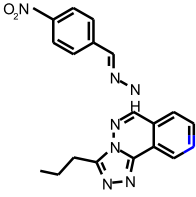<br>[*]:[cH]:[*] | -0.0843 | 423 out of 503 |
|---------|----|-----------------------------------------------------------------------------------------------------|---------|----------------|

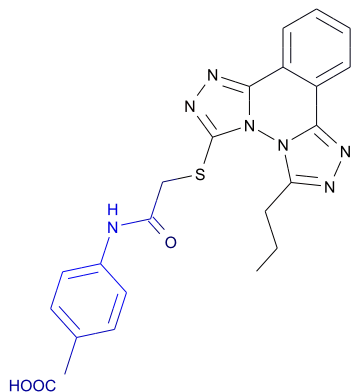
 $C_{22}H_{19}N_7O_3S$ 

Molecular Weight: 461.49635

ALogP: 3.42

Rotatable Bonds: 7

Acceptors: 8

Donors: 2

## Model Prediction

Prediction: Non-Irritant

Probability: 0.00137

Enrichment: 0.00149

Bayesian Score: -7.93

Mahalanobis Distance: 13.3

Mahalanobis Distance p-value: 8.82e-009

Prediction: Positive if the Bayesian score is above the estimated best cutoff value from minimizing the false positive and false negative rate.

Probability: The estimated probability that the sample is in the positive category. This assumes that the Bayesian score follows a normal distribution and is different from the prediction using a cutoff.

Enrichment: An estimate of enrichment, that is, the increased likelihood (versus random) of this sample being in the category.

Bayesian Score: The standard Laplacian-modified Bayesian score.

Mahalanobis Distance: The Mahalanobis distance (MD) is the distance to the center of the training data. The larger the MD, the less trustworthy the prediction.

Mahalanobis Distance p-value: The p-value gives the fraction of training data with an MD greater than or equal to the one for the given sample, assuming normally distributed data. The smaller the p-value, the less trustworthy the prediction. For highly non-normal X properties (e.g., fingerprints), the MD p-value is wildly inaccurate.

## Structural Similar Compounds

| Name               | 2-Anthracenesulfonic acid, 1-amino-9,10-dihydro-9,10-dioxo-4-(2,4,6-trimethylanilino)-, monosodium salt                                            | 2,2'-Stilbenedisulfonic acid, 4,4'-dinitro-                                                                                                        | Benzenesulfonic acid, 2,2'-(4,4'-biphenylylene)di-, disodium salt                                         |
|--------------------|----------------------------------------------------------------------------------------------------------------------------------------------------|----------------------------------------------------------------------------------------------------------------------------------------------------|-----------------------------------------------------------------------------------------------------------|
| Structure          |                                                                                                                                                    |                                                                                                                                                    |                                                                                                           |
| Actual Endpoint    | Irritant                                                                                                                                           | Irritant                                                                                                                                           | Irritant                                                                                                  |
| Predicted Endpoint | Non-Irritant                                                                                                                                       | Irritant                                                                                                                                           | Non-Irritant                                                                                              |
| Distance           | 0.724                                                                                                                                              | 0.804                                                                                                                                              | 0.847                                                                                                     |
| Reference          | 85JCAE "Prehled Prumyslove Toxikologie; Organicke Latky," Marhold, J., Prague, Czechoslovakia, Avicenum, 1986 Volume(issue)/page/year: -,1327,1986 | 85JCAE "Prehled Prumyslove Toxikologie; Organicke Latky," Marhold, J., Prague, Czechoslovakia, Avicenum, 1986 Volume(issue)/page/year: -,1062,1986 | MVCRB3 MVC-Report. (Stockholm, Sweden) No.1-2, 1972-73. Discontinued. Volume(issue)/page/year: 2,193,1973 |

## Model Applicability

Unknown features are fingerprint features in the query molecule, but not found or appearing too infrequently in the training set.

- All properties and OPS components are within expected ranges.
- Unknown FCFP\_2 feature: -332197802: [\*][c]1:[\*]:[\*]:[c]([\*]):n:1:n:[\*]

## Feature Contribution

### Top features for positive contribution

| Fingerprint | Bit/Smiles | Feature Structure | Score | Irritant in training set |
|-------------|------------|-------------------|-------|--------------------------|
|             |            |                   |       |                          |

| FCFP_12                                | -1410079687 | 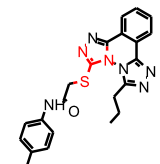   | 0.0756 | 6 out of 6               |
|----------------------------------------|-------------|---------------------------------------------------------------------------------------|--------|--------------------------|
|                                        |             | <chem>[*]S[c]([*])n:1:[*]</chem>                                                      |        |                          |
| FCFP_12                                | 4427049     |    | 0.0734 | 5 out of 5               |
|                                        |             | <chem>[*][c]([*])n:n([*]):[*]</chem>                                                  |        |                          |
| FCFP_12                                | -1539162406 |    | 0.0583 | 2 out of 2               |
|                                        |             | <chem>[*]C[c]([*])n:1:[*]</chem>                                                      |        |                          |
| Top Features for negative contribution |             |                                                                                       |        |                          |
| Fingerprint                            | Bit/Smiles  | Feature Structure                                                                     | Score  | Irritant in training set |
| FCFP_12                                | 1175665944  |   | -1.02  | 2 out of 8               |
|                                        |             | <chem>[*]CC(=O)N[c]([*])n:1:[*]</chem>                                                |        |                          |
| FCFP_12                                | -1838187238 |  | -0.692 | 5 out of 12              |
|                                        |             | <chem>[*]C(=O)N[c]([*])n:1:[*]</chem>                                                 |        |                          |

|         |           |                                                                                                                                            |       |            |
|---------|-----------|--------------------------------------------------------------------------------------------------------------------------------------------|-------|------------|
| FCFP_12 | 451043714 | <br><chem>CCCN1C=NC2=C1N=CN2SC3=CC=C(C=C3)C(=O)O</chem> | -0.65 | 0 out of 1 |
|---------|-----------|--------------------------------------------------------------------------------------------------------------------------------------------|-------|------------|

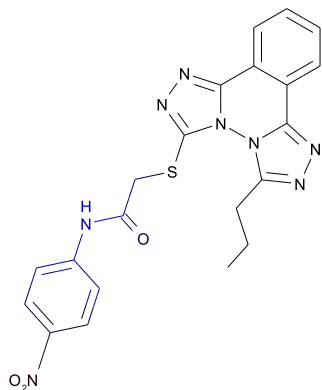

$C_{21}H_{18}N_8O_3S$

Molecular Weight: 462.48441

ALogP: 3.685

Rotatable Bonds: 7

Acceptors: 8

Donors: 1

## Model Prediction

Prediction: Non-Irritant

Probability: 0.717

Enrichment: 0.779

Bayesian Score: -3.88

Mahalanobis Distance: 8.89

Mahalanobis Distance p-value: 0.482

Prediction: Positive if the Bayesian score is above the estimated best cutoff value from minimizing the false positive and false negative rate.

Probability: The estimated probability that the sample is in the positive category. This assumes that the Bayesian score follows a normal distribution and is different from the prediction using a cutoff.

Enrichment: An estimate of enrichment, that is, the increased likelihood (versus random) of this sample being in the category.

Bayesian Score: The standard Laplacian-modified Bayesian score.

Mahalanobis Distance: The Mahalanobis distance (MD) is the distance to the center of the training data. The larger the MD, the less trustworthy the prediction.

Mahalanobis Distance p-value: The p-value gives the fraction of training data with an MD greater than or equal to the one for the given sample, assuming normally distributed data. The smaller the p-value, the less trustworthy the prediction. For highly non-normal X properties (e.g., fingerprints), the MD p-value is wildly inaccurate.

## Structural Similar Compounds

| Name               | 2,2'-Stilbenedisulfonic acid, 4,4'-dinitro-                                                                                                        | 2-Anthracenesulfonic acid, 1-amino-9,10-dihydro-9,10-dioxo-4-(2,4,6-trimethylanilino)-, monosodium salt                                            | Pregna-1,4-diene-3,20-dione, 21-(acetyloxy)-11-hydroxy-6-methyl-17-(1-oxopropoxy)-, (6- $\alpha$ ,11- $\beta$ )-                                                                 |
|--------------------|----------------------------------------------------------------------------------------------------------------------------------------------------|----------------------------------------------------------------------------------------------------------------------------------------------------|----------------------------------------------------------------------------------------------------------------------------------------------------------------------------------|
| Structure          |                                                                                                                                                    |                                                                                                                                                    |                                                                                                                                                                                  |
| Actual Endpoint    | Irritant                                                                                                                                           | Irritant                                                                                                                                           | Irritant                                                                                                                                                                         |
| Predicted Endpoint | Irritant                                                                                                                                           | Non-Irritant                                                                                                                                       | Irritant                                                                                                                                                                         |
| Distance           | 0.808                                                                                                                                              | 0.824                                                                                                                                              | 0.856                                                                                                                                                                            |
| Reference          | 85JCAE "Prehled Prumyslove Toxikologie; Organické Latky," Marhold, J., Prague, Czechoslovakia, Avicenum, 1986 Volume(issue)/page/year: -,1062,1986 | 85JCAE "Prehled Prumyslove Toxikologie; Organické Latky," Marhold, J., Prague, Czechoslovakia, Avicenum, 1986 Volume(issue)/page/year: -,1327,1986 | YACHDS Yakuri to Chiryō. Pharmacology and Therapeutics. (Raifu Saiensu Shup pan K.K., 2-5-13, Yaesu, Chuo-ku, Tokyo 104, Japan) V.1-1972- Volume(issue) /page/year: 19,3103,1991 |

## Model Applicability

Unknown features are fingerprint features in the query molecule, but not found or appearing too infrequently in the training set.

- All properties and OPS components are within expected ranges.
- Unknown FCFP\_2 feature: -332197802: [\*][c]1:[\*]:[\*]:[c](:[\*]):n:1:n:[\*]

## Feature Contribution

### Top features for positive contribution

| Fingerprint | Bit/Smiles | Feature Structure | Score | Irritant in training set |
|-------------|------------|-------------------|-------|--------------------------|
|             |            |                   |       |                          |

|                                               |                   |                                                                                                                                        |              |                                 |
|-----------------------------------------------|-------------------|----------------------------------------------------------------------------------------------------------------------------------------|--------------|---------------------------------|
| FCFP_12                                       | 5                 | 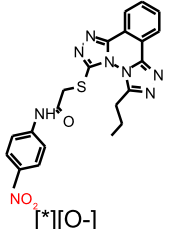<br>[*][O-]                                         | 0.0854       | 27 out of 27                    |
| FCFP_12                                       | 8                 | <br>[*][N+](=[*])[*]                                | 0.0843       | 20 out of 20                    |
| FCFP_12                                       | -828984032        | <br>[*][N+](=[*])[c]([cH]<br>);[*]:[cH]:[*]         | 0.0795       | 9 out of 9                      |
| <b>Top Features for negative contribution</b> |                   |                                                                                                                                        |              |                                 |
| <b>Fingerprint</b>                            | <b>Bit/Smiles</b> | <b>Feature Structure</b>                                                                                                               | <b>Score</b> | <b>Irritant in training set</b> |
| FCFP_12                                       | 1175665944        | <br>[*]CC(=O)N(c)[c]([cH]:<br>);[cH]:[*]           | -1.02        | 2 out of 8                      |
| FCFP_12                                       | -1838187238       | <br>[*]C(=[*])N(c)1:[cH]:<br>[cH]:[*]:[cH]:[cH]:1 | -0.692       | 5 out of 12                     |

|         |           |                                                                                                                                                                                  |       |            |
|---------|-----------|----------------------------------------------------------------------------------------------------------------------------------------------------------------------------------|-------|------------|
| FCFP_12 | 451043714 | 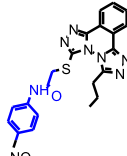 <p data-bbox="1260 267 1396 332"> <chem>[*]CC(=O)Nc1c[nH]c1c[nH]c1c[nH]c1c[nH]c1</chem> </p> | -0.65 | 0 out of 1 |
|---------|-----------|----------------------------------------------------------------------------------------------------------------------------------------------------------------------------------|-------|------------|

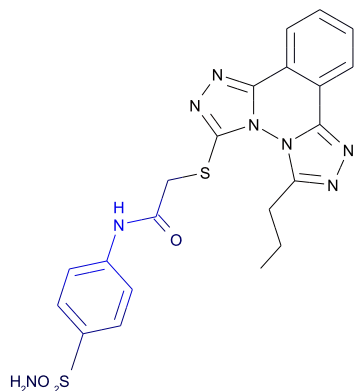

$C_{21}H_{20}N_8O_3S_2$   
 Molecular Weight: 496.56529  
 ALogP: 2.496  
 Rotatable Bonds: 7  
 Acceptors: 8  
 Donors: 2

### Model Prediction

Prediction: Non-Irritant

Probability: 0.0519

Enrichment: 0.0563

Bayesian Score: -6.25

Mahalanobis Distance: 9.4

Mahalanobis Distance p-value: 0.229

Prediction: Positive if the Bayesian score is above the estimated best cutoff value from minimizing the false positive and false negative rate.

Probability: The estimated probability that the sample is in the positive category. This assumes that the Bayesian score follows a normal distribution and is different from the prediction using a cutoff.

Enrichment: An estimate of enrichment, that is, the increased likelihood (versus random) of this sample being in the category.

Bayesian Score: The standard Laplacian-modified Bayesian score.

Mahalanobis Distance: The Mahalanobis distance (MD) is the distance to the center of the training data. The larger the MD, the less trustworthy the prediction.

Mahalanobis Distance p-value: The p-value gives the fraction of training data with an MD greater than or equal to the one for the given sample, assuming normally distributed data. The smaller the p-value, the less trustworthy the prediction. For highly non-normal X properties (e.g., fingerprints), the MD p-value is wildly inaccurate.

### Structural Similar Compounds

| Name               | 2,2'-Stilbenedisulfonic acid, 4,4'-dinitro-                                                                                                        | Benzenesulfonic acid, 2,2'-(1,4-anthraquinonylenediimino)bis(5-methyl-, disodium salt                                                              | 2-Anthracenesulfonic acid, 1-amino-9,10-dihydro-9,10-dioxo-4-(2,4,6-trimethylanilino)-, monosodium salt                                            |
|--------------------|----------------------------------------------------------------------------------------------------------------------------------------------------|----------------------------------------------------------------------------------------------------------------------------------------------------|----------------------------------------------------------------------------------------------------------------------------------------------------|
| Structure          |                                                                                                                                                    |                                                                                                                                                    |                                                                                                                                                    |
| Actual Endpoint    | Irritant                                                                                                                                           | Irritant                                                                                                                                           | Irritant                                                                                                                                           |
| Predicted Endpoint | Irritant                                                                                                                                           | Non-Irritant                                                                                                                                       | Non-Irritant                                                                                                                                       |
| Distance           | 0.748                                                                                                                                              | 0.764                                                                                                                                              | 0.825                                                                                                                                              |
| Reference          | 85JCAE "Prehled Prumyslove Toxikologie; Organicke Latky," Marhold, J., Prague, Czechoslovakia, Avicenum, 1986 Volume(issue)/page/year: -,1062,1986 | 85JCAE "Prehled Prumyslove Toxikologie; Organicke Latky," Marhold, J., Prague, Czechoslovakia, Avicenum, 1986 Volume(issue)/page/year: -,1330,1986 | 85JCAE "Prehled Prumyslove Toxikologie; Organicke Latky," Marhold, J., Prague, Czechoslovakia, Avicenum, 1986 Volume(issue)/page/year: -,1327,1986 |

### Model Applicability

Unknown features are fingerprint features in the query molecule, but not found or appearing too infrequently in the training set.

- All properties and OPS components are within expected ranges.
- Unknown FCFP\_2 feature: -332197802: [\*][c]1:[\*]:[\*]:[c]([\*]):n:1:n:[\*]

### Feature Contribution

#### Top features for positive contribution

| Fingerprint | Bit/Smiles | Feature Structure | Score | Irritant in training set |
|-------------|------------|-------------------|-------|--------------------------|
|             |            |                   |       |                          |



|                                               |                   |                                                                                                                                                          |              |                                 |
|-----------------------------------------------|-------------------|----------------------------------------------------------------------------------------------------------------------------------------------------------|--------------|---------------------------------|
| FCFP_12                                       | -1410079687       | 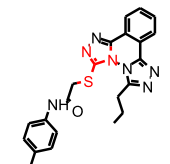<br>[*]S[c]1:n:[*]:[*]:n:<br>1:[*]                                    | 0.0756       | 6 out of 6                      |
| FCFP_12                                       | 4427049           | <br>[*]C(:[*]):n:n(:[*]<br>):[*]                                      | 0.0734       | 5 out of 5                      |
| FCFP_12                                       | -1539162406       | <br>[*]C[c]1:n:[*]:[*]:n:<br>1:[*]                                    | 0.0583       | 2 out of 2                      |
| <b>Top Features for negative contribution</b> |                   |                                                                                                                                                          |              |                                 |
| <b>Fingerprint</b>                            | <b>Bit/Smiles</b> | <b>Feature Structure</b>                                                                                                                                 | <b>Score</b> | <b>Irritant in training set</b> |
| FCFP_12                                       | 1175665944        | <br>HNO <sub>3</sub><br>[*]C(=O)N[c]([cH]:[<br>*])[cH]:[*]           | -1.02        | 2 out of 8                      |
| FCFP_12                                       | -1838187238       | <br>HNO <sub>3</sub><br>[*]C(=*)N[c]1:[cH]:<br>[cH]:[*]:[cH]:[cH]:1 | -0.692       | 5 out of 12                     |

|         |           |                                                                                                                                                                                                                                 |       |            |
|---------|-----------|---------------------------------------------------------------------------------------------------------------------------------------------------------------------------------------------------------------------------------|-------|------------|
| FCFP_12 | 451043714 | 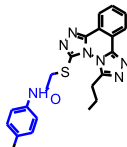 <p data-bbox="1262 261 1388 326"> <chem>CCCC1=NC=CC=C1S(=O)(=O)NC2=CC=CC=C2</chem><br/> [*]CC(=O)N(c)[*][cH]:[cH]:[c]([*]):[cH]:[cH]:1 </p> | -0.65 | 0 out of 1 |
|---------|-----------|---------------------------------------------------------------------------------------------------------------------------------------------------------------------------------------------------------------------------------|-------|------------|

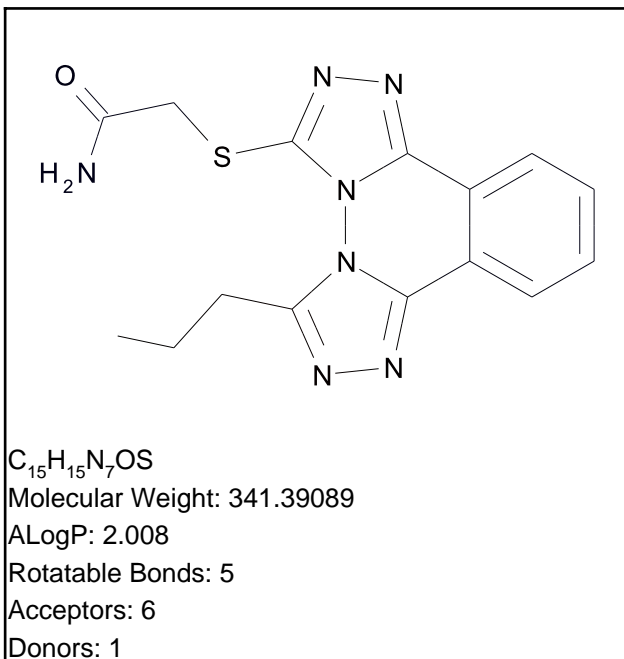

### Model Prediction

Prediction: Non-Irritant

Probability: 0.972

Enrichment: 1.06

Bayesian Score: -0.862

Mahalanobis Distance: 7.82

Mahalanobis Distance p-value: 0.926

Prediction: Positive if the Bayesian score is above the estimated best cutoff value from minimizing the false positive and false negative rate.

Probability: The estimated probability that the sample is in the positive category. This assumes that the Bayesian score follows a normal distribution and is different from the prediction using a cutoff.

Enrichment: An estimate of enrichment, that is, the increased likelihood (versus random) of this sample being in the category. Bayesian Score: The standard Laplacian-modified Bayesian score.

Mahalanobis Distance: The Mahalanobis distance (MD) is the distance to the center of the training data. The larger the MD, the less trustworthy the prediction.

Mahalanobis Distance p-value: The p-value gives the fraction of training data with an MD greater than or equal to the one for the given sample, assuming normally distributed data. The smaller the p-value, the less trustworthy the prediction. For highly non-normal X properties (e.g., fingerprints), the MD p-value is wildly inaccurate.

### Structural Similar Compounds

| Name               | Benzenesulfonic acid, 2-anilino-5-nitro-                                                                                                           | Benzenesulfonamide, 4-amino-N-(5,6-dimethoxy-4-pyrimidinyl)- | Acetic acid, 2-(sec-butyl)-4,6-dinitrophenyl ester                                                                                                |
|--------------------|----------------------------------------------------------------------------------------------------------------------------------------------------|--------------------------------------------------------------|---------------------------------------------------------------------------------------------------------------------------------------------------|
| Structure          |                                                                                                                                                    |                                                              |                                                                                                                                                   |
| Actual Endpoint    | Irritant                                                                                                                                           | Irritant                                                     | Irritant                                                                                                                                          |
| Predicted Endpoint | Non-Irritant                                                                                                                                       | Non-Irritant                                                 | Non-Irritant                                                                                                                                      |
| Distance           | 0.716                                                                                                                                              | 0.727                                                        | 0.728                                                                                                                                             |
| Reference          | 85JCAE "Prehled Prumyslove Toxikologie; Organicke Latky," Marhold, J., Prague, Czechoslovakia, Avicenum, 1986 Volume(issue)/page/year: -,1061,1986 | FCTXAV 14,307,76                                             | 85JCAE "Prehled Prumyslove Toxikologie; Organicke Latky," Marhold, J., Prague, Czechoslovakia, Avicenum, 1986 Volume(issue)/page/year: -,750,1986 |

### Model Applicability

Unknown features are fingerprint features in the query molecule, but not found or appearing too infrequently in the training set.

1. All properties and OPS components are within expected ranges.
2. Unknown FCFP\_2 feature: -332197802: [\*][c]1:[\*]:[\*]:[c]([\*]):n:1:n:[\*]

### Feature Contribution

#### Top features for positive contribution

| Fingerprint | Bit/Smiles | Feature Structure | Score | Irritant in training set |
|-------------|------------|-------------------|-------|--------------------------|
|             |            |                   |       |                          |

|                                               |                   |                                                                                                                                                  |              |                                 |
|-----------------------------------------------|-------------------|--------------------------------------------------------------------------------------------------------------------------------------------------|--------------|---------------------------------|
| FCFP_12                                       | -1410079687       | 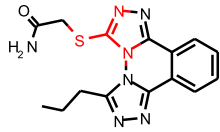<br>[*]S[c]1:n:[*]:[*]:n:<br>1:[*]                            | 0.0756       | 6 out of 6                      |
| FCFP_12                                       | 4427049           | <br>[*][c](:[*]):n:n(:[*]<br>):[*]                            | 0.0734       | 5 out of 5                      |
| FCFP_12                                       | -1578026142       | <br>[*]:[c](:[*])CCC                                          | 0.0583       | 2 out of 2                      |
| <b>Top Features for negative contribution</b> |                   |                                                                                                                                                  |              |                                 |
| <b>Fingerprint</b>                            | <b>Bit/Smiles</b> | <b>Feature Structure</b>                                                                                                                         | <b>Score</b> | <b>Irritant in training set</b> |
| FCFP_12                                       | 566058135         | <br>[*]CC(=O)N[*]                                            | -0.367       | 13 out of 21                    |
| FCFP_12                                       | -1320007763       | <br>[*][c](:[*]):[c]1:[cH]<br>]:[cH]:[cH]:[*]:[c]:<br>1:[*] | -0.0893      | 20 out of 24                    |

|         |            |                                                                                                                    |         |                |
|---------|------------|--------------------------------------------------------------------------------------------------------------------|---------|----------------|
| FCFP_12 | 1618154665 | 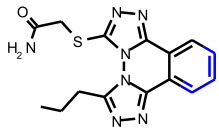<br>[*]:[cH]:[cH]:[cH]:[*]<br>] | -0.0845 | 412 out of 490 |
|---------|------------|--------------------------------------------------------------------------------------------------------------------|---------|----------------|

# Doxorubicin

# TOPKAT\_Skin\_Irritancy\_None\_vs\_Irritant

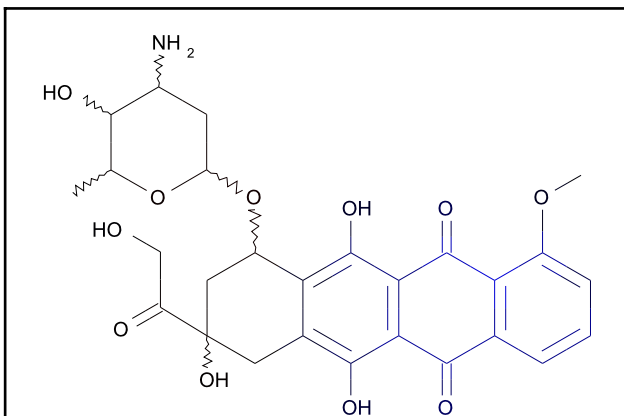

$C_{27}H_{29}NO_{11}$

Molecular Weight: 543.51925

ALogP: -4.4e-002

Rotatable Bonds: 5

Acceptors: 12

Donors: 6

## Model Prediction

Prediction: Non-Irritant

Probability: 0.464

Enrichment: 0.503

Bayesian Score: -4.65

Mahalanobis Distance: 14.4

Mahalanobis Distance p-value: 5.01e-012

Prediction: Positive if the Bayesian score is above the estimated best cutoff value from minimizing the false positive and false negative rate.

Probability: The estimated probability that the sample is in the positive category. This assumes that the Bayesian score follows a normal distribution and is different from the prediction using a cutoff.

Enrichment: An estimate of enrichment, that is, the increased likelihood (versus random) of this sample being in the category.

Bayesian Score: The standard Laplacian-modified Bayesian score.

Mahalanobis Distance: The Mahalanobis distance (MD) is the distance to the center of the training data. The larger the MD, the less trustworthy the prediction.

Mahalanobis Distance p-value: The p-value gives the fraction of training data with an MD greater than or equal to the one for the given sample, assuming normally distributed data. The smaller the p-value, the less trustworthy the prediction. For highly non-normal X properties (e.g., fingerprints), the MD p-value is wildly inaccurate.

## Structural Similar Compounds

| Name               | 1,3,6-Naphthalenetrisulfonic acid, 7-amino-                                                                                                        | Amipurimycin, hydrate                                                                                                                                                                  | 2,2'-Benzidine disulfonic acid |
|--------------------|----------------------------------------------------------------------------------------------------------------------------------------------------|----------------------------------------------------------------------------------------------------------------------------------------------------------------------------------------|--------------------------------|
| Structure          |                                                                                                                                                    |                                                                                                                                                                                        |                                |
| Actual Endpoint    | Irritant                                                                                                                                           | Irritant                                                                                                                                                                               | Non-Irritant                   |
| Predicted Endpoint | Non-Irritant                                                                                                                                       | Non-Irritant                                                                                                                                                                           | Non-Irritant                   |
| Distance           | 1.158                                                                                                                                              | 1.186                                                                                                                                                                                  | 1.233                          |
| Reference          | 85JCAE "Prehled Prumyslove Toxikologie; Organicke Latky," Marhold, J., Prague, Czechoslovakia, Avicenum, 1986 Volume(issue)/page/year: -,1058,1986 | JANTAJ Journal of Antibiotics. (Japan Antibiotics Research Assoc., 2-20-8 Ka miosaki, Shinagawa-ku, Tokyo, 141, Japan) V.2-5, 1948-52; V.21- 1968- Volume(i ssue)/page/year: 30,1,1977 | 28ZPAK -,191,72                |

## Model Applicability

Unknown features are fingerprint features in the query molecule, but not found or appearing too infrequently in the training set.

1. All properties and OPS components are within expected ranges.

## Feature Contribution

### Top features for positive contribution

| Fingerprint | Bit/Smiles | Feature Structure | Score | Irritant in training set |
|-------------|------------|-------------------|-------|--------------------------|
|             |            |                   |       |                          |

|                                               |                   |                                                                                                                                                                                                                          |              |                                 |
|-----------------------------------------------|-------------------|--------------------------------------------------------------------------------------------------------------------------------------------------------------------------------------------------------------------------|--------------|---------------------------------|
| FCFP_12                                       | -415156552        | 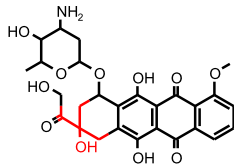<br><chem>[*]CC(O)(C[*])C(=[*])</chem><br><chem>[*]</chem>                                                                            | 0.0854       | 27 out of 27                    |
| FCFP_12                                       | 699500266         | <br><chem>[*]CC(O[*])O[*]</chem>                                                                                                      | 0.0852       | 25 out of 25                    |
| FCFP_12                                       | -180489926        | <br><chem>[*]C([*])OC1CC([*])[*]</chem><br><chem>]C([*])O1</chem>                                                                     | 0.0795       | 9 out of 9                      |
| <b>Top Features for negative contribution</b> |                   |                                                                                                                                                                                                                          |              |                                 |
| <b>Fingerprint</b>                            | <b>Bit/Smiles</b> | <b>Feature Structure</b>                                                                                                                                                                                                 | <b>Score</b> | <b>Irritant in training set</b> |
| FCFP_12                                       | 979221427         | <br><chem>[*][c]1:[*]:[c]([*])</chem><br><chem>[c]2C(=[*])[c]3:[c]([*]):[*]:[cH]:[cH]:[c]:3C(=O)[c]:2:[c]:1</chem><br><chem>O</chem> | -0.846       | 1 out of 4                      |
| FCFP_12                                       | 523781771         | <br><chem>[*][c]1:[*]:[c]([*])</chem><br><chem>[c]2C(=[*])[*]:[c]([*])C(=O)[c]:2:[c]:1</chem><br><chem>O</chem>                     | -0.732       | 3 out of 8                      |

|         |            |                                                                                                                                                                                                          |        |             |
|---------|------------|----------------------------------------------------------------------------------------------------------------------------------------------------------------------------------------------------------|--------|-------------|
| FCFP_12 | 1392625818 | 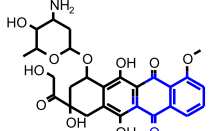 <p data-bbox="1266 256 1423 329"> [*][c]1:[cH]:[cH]:[cH]:[cH]<br/> ]:[c]2C(=O)[c](:[*])<br/> :[*]C(=[*])[c]:1:2 </p> | -0.558 | 9 out of 18 |
|---------|------------|----------------------------------------------------------------------------------------------------------------------------------------------------------------------------------------------------------|--------|-------------|



7a

TOPKAT\_Carcinogenic\_Potency\_TD50\_Mouse

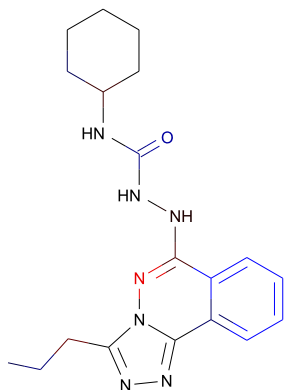C<sub>19</sub>H<sub>25</sub>N<sub>7</sub>O

Molecular Weight: 367.44809

ALogP: 3.681

Rotatable Bonds: 5

Acceptors: 5

Donors: 3

**Model Prediction**

Prediction: 8.1

Unit: mg/kg\_body\_weight/day

Mahalanobis Distance: 11.2

Mahalanobis Distance p-value: 0.000779

Mahalanobis Distance: The Mahalanobis distance (MD) is a generalization of the Euclidean distance that accounts for correlations among the X properties. It is calculated as the distance to the center of the training data. The larger the MD, the less trustworthy the prediction.

Mahalanobis Distance p-value: The p-value gives the fraction of training data with an MD greater than or equal to the one for the given sample, assuming normally distributed data. The smaller the p-value, the less trustworthy the prediction. For highly non-normal X properties (e.g., fingerprints), the MD p-value is wildly inaccurate.

**Structural Similar Compounds**

| Name                        | 542     | Ochratoxin A | Phenolphthalein |
|-----------------------------|---------|--------------|-----------------|
| Structure                   |         |              |                 |
| Actual Endpoint (-log C)    | 4.79932 | 4.79932      | 2.43468         |
| Predicted Endpoint (-log C) | 3.6353  | 3.6353       | 3.66084         |
| Distance                    | 0.699   | 0.699        | 0.703           |
| Reference                   | CPDB    | CPDB         | CPDB            |

**Model Applicability**

Unknown features are fingerprint features in the query molecule, but not found or appearing too infrequently in the training set.

1. All properties and OPS components are within expected ranges.
2. Unknown ECFP\_2 feature: -1507082173: [\*][c]1:[\*]:[\*]:[c](:[\*]):n:1:n:[\*]
3. Unknown ECFP\_2 feature: -435188506: [\*]C[c]1:n:[\*]:[\*]:n:1:[\*]

**Feature Contribution****Top features for positive contribution**

| Fingerprint | Bit/Smiles | Feature Structure | Score |
|-------------|------------|-------------------|-------|
| ECFP_6      | 655739385  |                   | 0.229 |

|                                               |                   |                                                                                                                                    |              |
|-----------------------------------------------|-------------------|------------------------------------------------------------------------------------------------------------------------------------|--------------|
| ECFP_6                                        | 1559650422        | 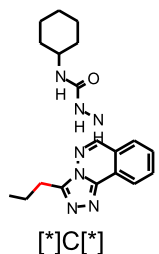<br>[*]C[*]                                      | 0.203        |
| ECFP_6                                        | 1333660716        | <br>[*]c(:[*]):[c](:[cH<br>]:[*]):[c](:[*]):[*] | 0.0746       |
| <b>Top Features for negative contribution</b> |                   |                                                                                                                                    |              |
| <b>Fingerprint</b>                            | <b>Bit/Smiles</b> | <b>Feature Structure</b>                                                                                                           | <b>Score</b> |
| ECFP_6                                        | 1996767644        | <br>[*]:[cH]:[cH]:[c](:[*<br>]):[*]             | -0.251       |
| ECFP_6                                        | 642810091         | <br>[*]:[c](:[*]):[*]                          | -0.247       |
| ECFP_6                                        | 182236392         | <br>[*]:[cH]:[*]                              | -0.232       |



7b

TOPKAT\_Carcinogenic\_Potency\_TD50\_Mouse

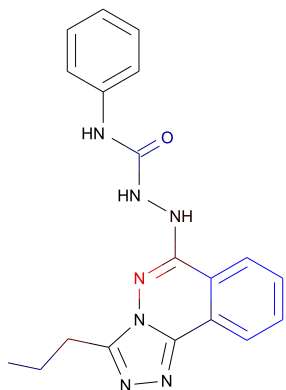C<sub>19</sub>H<sub>19</sub>N<sub>7</sub>O

Molecular Weight: 361.40046

ALogP: 3.399

Rotatable Bonds: 5

Acceptors: 5

Donors: 3

**Model Prediction**

Prediction: 7.62

Unit: mg/kg\_body\_weight/day

Mahalanobis Distance: 11.3

Mahalanobis Distance p-value: 0.000436

Mahalanobis Distance: The Mahalanobis distance (MD) is a generalization of the Euclidean distance that accounts for correlations among the X properties. It is calculated as the distance to the center of the training data. The larger the MD, the less trustworthy the prediction.

Mahalanobis Distance p-value: The p-value gives the fraction of training data with an MD greater than or equal to the one for the given sample, assuming normally distributed data. The smaller the p-value, the less trustworthy the prediction. For highly non-normal X properties (e.g., fingerprints), the MD p-value is wildly inaccurate.

**Structural Similar Compounds**

| Name                        | Phenolphthalein | 646      | 542     |
|-----------------------------|-----------------|----------|---------|
| Structure                   |                 |          |         |
| Actual Endpoint (-log C)    | 2.43468         | 0.937339 | 4.79932 |
| Predicted Endpoint (-log C) | 3.66084         | 3.26294  | 3.6353  |
| Distance                    | 0.751           | 0.813    | 0.818   |
| Reference                   | CPDB            | CPDB     | CPDB    |

**Model Applicability**

Unknown features are fingerprint features in the query molecule, but not found or appearing too infrequently in the training set.

1. All properties and OPS components are within expected ranges.
2. Unknown ECFP\_2 feature: -1507082173: [\*][c]1:[\*]:[\*]:[c](:[\*]):n:1:n:[\*]
3. Unknown ECFP\_2 feature: -435188506: [\*]C[c]1:n:[\*]:[\*]:n:1:[\*]

**Feature Contribution****Top features for positive contribution**

| Fingerprint | Bit/Smiles | Feature Structure | Score |
|-------------|------------|-------------------|-------|
| ECFP_6      | 655739385  |                   | 0.229 |

|                                               |                   |                                                                                                                                      |              |
|-----------------------------------------------|-------------------|--------------------------------------------------------------------------------------------------------------------------------------|--------------|
| ECFP_6                                        | 1559650422        | 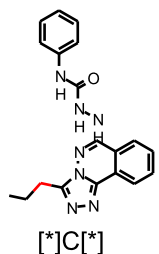<br>[*][C*]                                        | 0.203        |
| ECFP_6                                        | 1333660716        | <br>[*][c](:[*]):[c](:[cH<br>]:[*]):[c](:[*]):[*] | 0.0746       |
| <b>Top Features for negative contribution</b> |                   |                                                                                                                                      |              |
| <b>Fingerprint</b>                            | <b>Bit/Smiles</b> | <b>Feature Structure</b>                                                                                                             | <b>Score</b> |
| ECFP_6                                        | 1996767644        | <br>[*]:[cH]:[cH]:[c](:[*<br>]):[*]               | -0.251       |
| ECFP_6                                        | 642810091         | <br>[*]:[c](:[*]):[*]                            | -0.247       |
| ECFP_6                                        | 182236392         | <br>[*]:[cH]:[*]                                | -0.232       |



8a

TOPKAT\_Carcinogenic\_Potency\_TD50\_Mouse

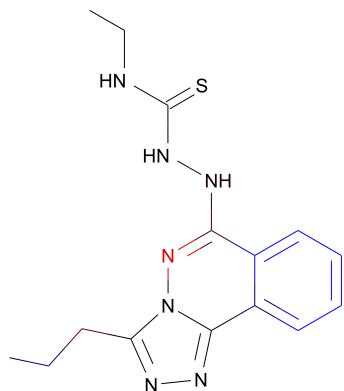C<sub>15</sub>H<sub>19</sub>N<sub>7</sub>S

Molecular Weight: 329.42325

ALogP: 3.388

Rotatable Bonds: 7

Acceptors: 5

Donors: 3

### Model Prediction

Prediction: 18.5

Unit: mg/kg\_body\_weight/day

Mahalanobis Distance: 11.3

Mahalanobis Distance p-value: 0.000422

Mahalanobis Distance: The Mahalanobis distance (MD) is a generalization of the Euclidean distance that accounts for correlations among the X properties. It is calculated as the distance to the center of the training data. The larger the MD, the less trustworthy the prediction.

Mahalanobis Distance p-value: The p-value gives the fraction of training data with an MD greater than or equal to the one for the given sample, assuming normally distributed data. The smaller the p-value, the less trustworthy the prediction. For highly non-normal X properties (e.g., fingerprints), the MD p-value is wildly inaccurate.

### Structural Similar Compounds

| Name                        | 4-Chloro-6-(2,3-xylylidino)-2-pyridinylthio(N-b-hydroxy-ethyl) acetamide | 542     | Ochratoxin A |
|-----------------------------|--------------------------------------------------------------------------|---------|--------------|
| Structure                   |                                                                          |         |              |
| Actual Endpoint (-log C)    | 3.91517                                                                  | 4.79932 | 4.79932      |
| Predicted Endpoint (-log C) | 3.92186                                                                  | 3.6353  | 3.6353       |
| Distance                    | 0.669                                                                    | 0.683   | 0.683        |
| Reference                   | CPDB                                                                     | CPDB    | CPDB         |

### Model Applicability

Unknown features are fingerprint features in the query molecule, but not found or appearing too infrequently in the training set.

1. All properties and OPS components are within expected ranges.
2. Unknown ECFP\_2 feature: -1507082173: [\*][c]1:[\*]:[\*]:[c](:[\*]):n:1:n:[\*]
3. Unknown ECFP\_2 feature: -435188506: [\*]C[c]1:n:[\*]:[\*]:n:1:[\*]
4. Unknown ECFP\_2 feature: 150794520: [\*]NC(=S)N[\*]

### Feature Contribution

#### Top features for positive contribution

| Fingerprint | Bit/Smiles | Feature Structure | Score |
|-------------|------------|-------------------|-------|
| ECFP_6      | 655739385  |                   | 0.229 |

|                                               |                   |                                                                                                                                      |              |
|-----------------------------------------------|-------------------|--------------------------------------------------------------------------------------------------------------------------------------|--------------|
| ECFP_6                                        | 1559650422        | 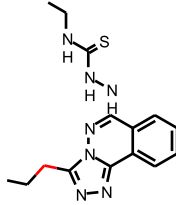<br>[*]C[*]                                       | 0.203        |
| ECFP_6                                        | 1333660716        | <br>[*][c](:[*]):[c](:[cH<br>]:[*]):[c](:[*]):[*] | 0.0746       |
| <b>Top Features for negative contribution</b> |                   |                                                                                                                                      |              |
| <b>Fingerprint</b>                            | <b>Bit/Smiles</b> | <b>Feature Structure</b>                                                                                                             | <b>Score</b> |
| ECFP_6                                        | 1996767644        | <br>[*]:[cH]:[cH]:[c](:[*<br>]):[*]               | -0.251       |
| ECFP_6                                        | 642810091         | <br>[*]:[c](:[*]):[*]                            | -0.247       |
| ECFP_6                                        | 182236392         | <br>[*]:[cH]:[*]                                | -0.232       |





8b

TOPKAT\_Carcinogenic\_Potency\_TD50\_Mouse

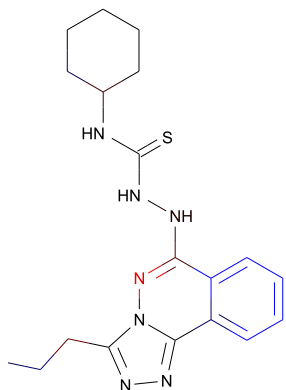C<sub>19</sub>H<sub>25</sub>N<sub>7</sub>S

Molecular Weight: 383.51369

ALogP: 4.898

Rotatable Bonds: 7

Acceptors: 5

Donors: 3

### Model Prediction

Prediction: 6.43

Unit: mg/kg\_body\_weight/day

Mahalanobis Distance: 12.6

Mahalanobis Distance p-value: 9.23e-007

Mahalanobis Distance: The Mahalanobis distance (MD) is a generalization of the Euclidean distance that accounts for correlations among the X properties. It is calculated as the distance to the center of the training data. The larger the MD, the less trustworthy the prediction.

Mahalanobis Distance p-value: The p-value gives the fraction of training data with an MD greater than or equal to the one for the given sample, assuming normally distributed data. The smaller the p-value, the less trustworthy the prediction. For highly non-normal X properties (e.g., fingerprints), the MD p-value is wildly inaccurate.

### Structural Similar Compounds

| Name                        | 542     | Ochratoxin A | 4-Chloro-6-(2,3-xylylidino)-2-pyrimidylthio(N-b-hydroxy-ethyl) acetamide |
|-----------------------------|---------|--------------|--------------------------------------------------------------------------|
| Structure                   |         |              |                                                                          |
| Actual Endpoint (-log C)    | 4.79932 | 4.79932      | 3.91517                                                                  |
| Predicted Endpoint (-log C) | 3.6353  | 3.6353       | 3.92186                                                                  |
| Distance                    | 0.716   | 0.716        | 0.764                                                                    |
| Reference                   | CPDB    | CPDB         | CPDB                                                                     |

### Model Applicability

Unknown features are fingerprint features in the query molecule, but not found or appearing too infrequently in the training set.

1. All properties and OPS components are within expected ranges.
2. Unknown ECFP\_2 feature: -1507082173: [\*][c]1:[\*]:[\*]:[c](:[\*]):n:1:n:[\*]
3. Unknown ECFP\_2 feature: -435188506: [\*]C[c]1:n:[\*]:[\*]:n:1:[\*]
4. Unknown ECFP\_2 feature: 150794520: [\*]NC(=S)N[\*]

### Feature Contribution

#### Top features for positive contribution

| Fingerprint | Bit/Smiles | Feature Structure | Score |
|-------------|------------|-------------------|-------|
| ECFP_6      | 655739385  | <br>[*]:n:[*]     | 0.229 |

|                                               |                   |                                                                                                                                    |              |
|-----------------------------------------------|-------------------|------------------------------------------------------------------------------------------------------------------------------------|--------------|
| ECFP_6                                        | 1559650422        | 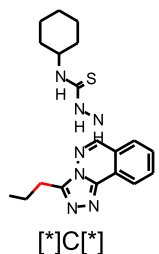<br>[*]C[*]                                      | 0.203        |
| ECFP_6                                        | 1333660716        | <br>[*]c(:[*]):[c](:[cH<br>]:[*]):[c](:[*]):[*] | 0.0746       |
| <b>Top Features for negative contribution</b> |                   |                                                                                                                                    |              |
| <b>Fingerprint</b>                            | <b>Bit/Smiles</b> | <b>Feature Structure</b>                                                                                                           | <b>Score</b> |
| ECFP_6                                        | 1996767644        | <br>[*]:[cH]:[cH]:[c](:[*<br>]):[*]             | -0.251       |
| ECFP_6                                        | 642810091         | <br>[*]:[c](:[*]):[*]                          | -0.247       |
| ECFP_6                                        | 182236392         | <br>[*]:[cH]:[*]                              | -0.232       |



9a

TOPKAT\_Carcinogenic\_Potency\_TD50\_Mouse

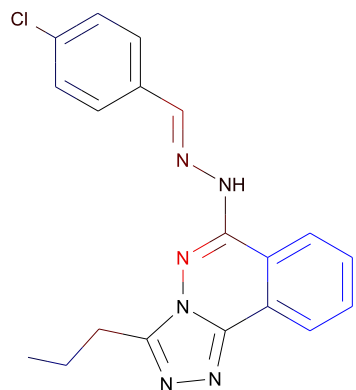

$C_{19}H_{17}ClN_6$   
 Molecular Weight: 364.83147  
 ALogP: 4.967  
 Rotatable Bonds: 5  
 Acceptors: 5  
 Donors: 1

### Model Prediction

Prediction: 3.41  
 Unit: mg/kg\_body\_weight/day  
 Mahalanobis Distance: 13.3  
 Mahalanobis Distance p-value: 1.93e-008

Mahalanobis Distance: The Mahalanobis distance (MD) is a generalization of the Euclidean distance that accounts for correlations among the X properties. It is calculated as the distance to the center of the training data. The larger the MD, the less trustworthy the prediction.

Mahalanobis Distance p-value: The p-value gives the fraction of training data with an MD greater than or equal to the one for the given sample, assuming normally distributed data. The smaller the p-value, the less trustworthy the prediction. For highly non-normal X properties (e.g., fingerprints), the MD p-value is wildly inaccurate.

### Structural Similar Compounds

| Name                        | 646      | Phenolphthalein | C.I. pigment red 3 |
|-----------------------------|----------|-----------------|--------------------|
| Structure                   |          |                 |                    |
| Actual Endpoint (-log C)    | 0.937339 | 2.43468         | 0.937339           |
| Predicted Endpoint (-log C) | 3.26294  | 3.66084         | 3.17837            |
| Distance                    | 0.726    | 0.754           | 0.847              |
| Reference                   | CPDB     | CPDB            | CPDB               |

### Model Applicability

Unknown features are fingerprint features in the query molecule, but not found or appearing too infrequently in the training set.

1. OPS PC24 out of range. Value: -4.6354. Training min, max, SD, explained variance: -4.4826, 3.8729, 1.034, 0.0133.
2. OPS PC26 out of range. Value: -3.6943. Training min, max, SD, explained variance: -2.9667, 3.5042, 1.009, 0.0127.
3. Unknown ECFP\_2 feature: -1507082173: [\*][c]1:[\*]:[\*]:[c](:[\*]):n:1:n:[\*]
4. Unknown ECFP\_2 feature: -435188506: [\*]C[c]1:n:[\*]:[\*]:n:1:[\*]

### Feature Contribution

#### Top features for positive contribution

| Fingerprint | Bit/Smiles | Feature Structure | Score |
|-------------|------------|-------------------|-------|
| ECFP_6      | 655739385  | <br>[*]:n:[*]     | 0.229 |

|                                               |                   |                                                                                                                       |              |
|-----------------------------------------------|-------------------|-----------------------------------------------------------------------------------------------------------------------|--------------|
| ECFP_6                                        | 1559650422        | 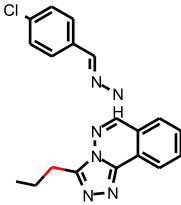<br>[*]C[*]                        | 0.203        |
| ECFP_6                                        | -1925046727       | <br>[*]C=[*]                       | 0.145        |
| <b>Top Features for negative contribution</b> |                   |                                                                                                                       |              |
| <b>Fingerprint</b>                            | <b>Bit/Smiles</b> | <b>Feature Structure</b>                                                                                              | <b>Score</b> |
| ECFP_6                                        | 1996767644        | <br>[*]:[cH]:[cH]:[c]:[*]<br>):[*] | -0.251       |
| ECFP_6                                        | 642810091         | <br>[*]:[c]:[*]:[*]              | -0.247       |
| ECFP_6                                        | -182236392        | <br>[*]:[cH]:[*]                 | -0.232       |



9b

TOPKAT\_Carcinogenic\_Potency\_TD50\_Mouse

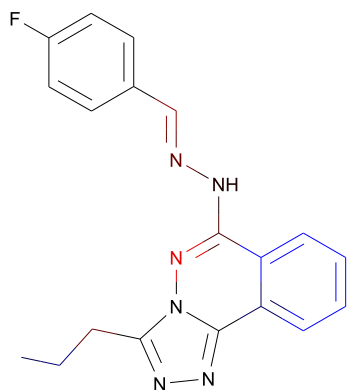C<sub>19</sub>H<sub>17</sub>FN<sub>6</sub>

Molecular Weight: 348.37688

ALogP: 4.508

Rotatable Bonds: 5

Acceptors: 5

Donors: 1

**Model Prediction**

Prediction: 4.41

Unit: mg/kg\_body\_weight/day

Mahalanobis Distance: 11.7

Mahalanobis Distance p-value: 8.38e-005

Mahalanobis Distance: The Mahalanobis distance (MD) is a generalization of the Euclidean distance that accounts for correlations among the X properties. It is calculated as the distance to the center of the training data. The larger the MD, the less trustworthy the prediction.

Mahalanobis Distance p-value: The p-value gives the fraction of training data with an MD greater than or equal to the one for the given sample, assuming normally distributed data. The smaller the p-value, the less trustworthy the prediction. For highly non-normal X properties (e.g., fingerprints), the MD p-value is wildly inaccurate.

**Structural Similar Compounds**

| Name                        | 646      | Phenolphthalein | C.I. pigment red 3 |
|-----------------------------|----------|-----------------|--------------------|
| Structure                   |          |                 |                    |
| Actual Endpoint (-log C)    | 0.937339 | 2.43468         | 0.937339           |
| Predicted Endpoint (-log C) | 3.26294  | 3.66084         | 3.17837            |
| Distance                    | 0.726    | 0.744           | 0.840              |
| Reference                   | CPDB     | CPDB            | CPDB               |

**Model Applicability**

Unknown features are fingerprint features in the query molecule, but not found or appearing too infrequently in the training set.

1. All properties and OPS components are within expected ranges.
2. Unknown ECFP\_2 feature: -1507082173: [\*][c]1:[\*]:[\*]:[c]([\*]):n:1:n:[\*]
3. Unknown ECFP\_2 feature: -435188506: [\*]C[c]1:n:[\*]:[\*]:n:1:[\*]

**Feature Contribution****Top features for positive contribution**

| Fingerprint | Bit/Smiles | Feature Structure | Score |
|-------------|------------|-------------------|-------|
| ECFP_6      | 655739385  | <br>[*]:n:[*]     | 0.229 |



|                                               |                   |                                                                                                                        |              |
|-----------------------------------------------|-------------------|------------------------------------------------------------------------------------------------------------------------|--------------|
| ECFP_6                                        | 1559650422        | 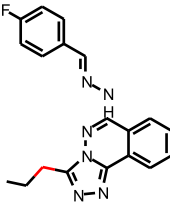<br>[*]C[*]                         | 0.203        |
| ECFP_6                                        | -1925046727       | <br>[*]C=[*]                        | 0.145        |
| <b>Top Features for negative contribution</b> |                   |                                                                                                                        |              |
| <b>Fingerprint</b>                            | <b>Bit/Smiles</b> | <b>Feature Structure</b>                                                                                               | <b>Score</b> |
| ECFP_6                                        | 1996767644        | <br>[*]:[cH]:[cH]:[c](:[*]<br>):[*] | -0.251       |
| ECFP_6                                        | 642810091         | <br>[*]:[c](:[*]):[*]             | -0.247       |
| ECFP_6                                        | -182236392        | <br>[*]:[cH]:[*]                  | -0.232       |



9c

## TOPKAT\_Carcinogenic\_Potency\_TD50\_Mouse

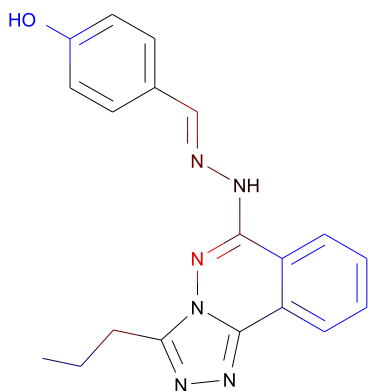C<sub>19</sub>H<sub>18</sub>N<sub>6</sub>O

Molecular Weight: 346.38582

ALogP: 4.061

Rotatable Bonds: 5

Acceptors: 6

Donors: 2

**Model Prediction**

Prediction: 10.5

Unit: mg/kg\_body\_weight/day

Mahalanobis Distance: 12.6

Mahalanobis Distance p-value: 1.12e-006

Mahalanobis Distance: The Mahalanobis distance (MD) is a generalization of the Euclidean distance that accounts for correlations among the X properties. It is calculated as the distance to the center of the training data. The larger the MD, the less trustworthy the prediction.

Mahalanobis Distance p-value: The p-value gives the fraction of training data with an MD greater than or equal to the one for the given sample, assuming normally distributed data. The smaller the p-value, the less trustworthy the prediction. For highly non-normal X properties (e.g., fingerprints), the MD p-value is wildly inaccurate.

**Structural Similar Compounds**

| Name                        | Phenolphthalein | 646      | C.I. pigment red 3 |
|-----------------------------|-----------------|----------|--------------------|
| Structure                   |                 |          |                    |
| Actual Endpoint (-log C)    | 2.43468         | 0.937339 | 0.937339           |
| Predicted Endpoint (-log C) | 3.66084         | 3.26294  | 3.17837            |
| Distance                    | 0.706           | 0.725    | 0.842              |
| Reference                   | CPDB            | CPDB     | CPDB               |

**Model Applicability**

Unknown features are fingerprint features in the query molecule, but not found or appearing too infrequently in the training set.

1. All properties and OPS components are within expected ranges.
2. Unknown ECFP\_2 feature: -1507082173: [\*][c]1:[\*]:[\*]:[c](:[\*]):n:1:n:[\*]
3. Unknown ECFP\_2 feature: -435188506: [\*]C[c]1:n:[\*]:[\*]:n:1:[\*]

**Feature Contribution****Top features for positive contribution**

| Fingerprint | Bit/Smiles | Feature Structure | Score |
|-------------|------------|-------------------|-------|
| ECFP_6      | 655739385  | <br>[*]:n:[*]     | 0.229 |

|                                               |                   |                                                                                                                          |              |
|-----------------------------------------------|-------------------|--------------------------------------------------------------------------------------------------------------------------|--------------|
| ECFP_6                                        | 1559650422        | 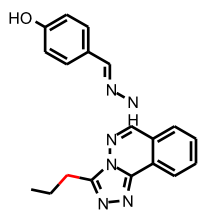<br>[*]C[*]                            | 0.203        |
| ECFP_6                                        | -1925046727       | <br>[*]C=[*]                          | 0.145        |
| <b>Top Features for negative contribution</b> |                   |                                                                                                                          |              |
| <b>Fingerprint</b>                            | <b>Bit/Smiles</b> | <b>Feature Structure</b>                                                                                                 | <b>Score</b> |
| ECFP_6                                        | 2019062761        | <br>[*]:[c](:[*])O                    | -0.258       |
| ECFP_6                                        | 1996767644        | <br>[*]:[cH]:[cH]:[c](:[*<br>]):[*] | -0.251       |
| ECFP_6                                        | 642810091         | <br>[*]:[c](:[*]):[*]               | -0.247       |



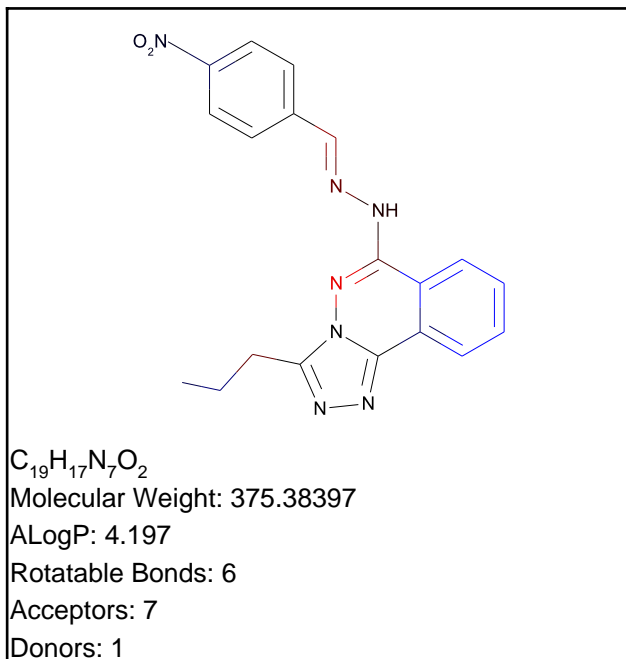

### Model Prediction

Prediction: 5.83

Unit: mg/kg\_body\_weight/day

Mahalanobis Distance: 11.8

Mahalanobis Distance p-value: 4.31e-005

Mahalanobis Distance: The Mahalanobis distance (MD) is a generalization of the Euclidean distance that accounts for correlations among the X properties. It is calculated as the distance to the center of the training data. The larger the MD, the less trustworthy the prediction.

Mahalanobis Distance p-value: The p-value gives the fraction of training data with an MD greater than or equal to the one for the given sample, assuming normally distributed data. The smaller the p-value, the less trustworthy the prediction. For highly non-normal X properties (e.g., fingerprints), the MD p-value is wildly inaccurate.

### Structural Similar Compounds

| Name                        | 646                                                                                 | Azathioprine s                                                                      | 470                                                                                 |
|-----------------------------|-------------------------------------------------------------------------------------|-------------------------------------------------------------------------------------|-------------------------------------------------------------------------------------|
| Structure                   | 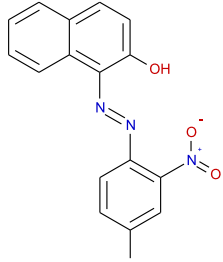 |  |  |
| Actual Endpoint (-log C)    | 0.937339                                                                            | 4.49253                                                                             | 4.62839                                                                             |
| Predicted Endpoint (-log C) | 3.26294                                                                             | 4.28607                                                                             | 3.93264                                                                             |
| Distance                    | 0.738                                                                               | 0.827                                                                               | 0.842                                                                               |
| Reference                   | CPDB                                                                                | CPDB                                                                                | CPDB                                                                                |

### Model Applicability

Unknown features are fingerprint features in the query molecule, but not found or appearing too infrequently in the training set.

1. All properties and OPS components are within expected ranges.
2. Unknown ECFP\_2 feature: -1507082173: [\*][c]1:[\*]:[\*]:[c](:[\*]):n:1:n:[\*]
3. Unknown ECFP\_2 feature: -435188506: [\*]C[c]1:n:[\*]:[\*]:n:1:[\*]

### Feature Contribution

#### Top features for positive contribution

| Fingerprint | Bit/Smiles | Feature Structure                                                                                  | Score |
|-------------|------------|----------------------------------------------------------------------------------------------------|-------|
| ECFP_6      | 655739385  | 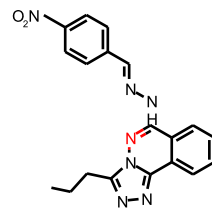<br>[*]:n:[*] | 0.229 |

|                                               |                   |                                                                                                                        |              |
|-----------------------------------------------|-------------------|------------------------------------------------------------------------------------------------------------------------|--------------|
| ECFP_6                                        | 1559650422        | 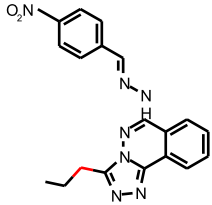<br>[*]C[*]                         | 0.203        |
| ECFP_6                                        | -1925046727       | <br>[*]C=[*]                        | 0.145        |
| <b>Top Features for negative contribution</b> |                   |                                                                                                                        |              |
| <b>Fingerprint</b>                            | <b>Bit/Smiles</b> | <b>Feature Structure</b>                                                                                               | <b>Score</b> |
| ECFP_6                                        | 1996767644        | <br>[*]:[cH]:[cH]:[c](:[*]<br>):[*] | -0.251       |
| ECFP_6                                        | 642810091         | <br>[*]:[c](:[*]):[*]              | -0.247       |
| ECFP_6                                        | -182236392        | <br>[*]:[cH]:[*]                  | -0.232       |





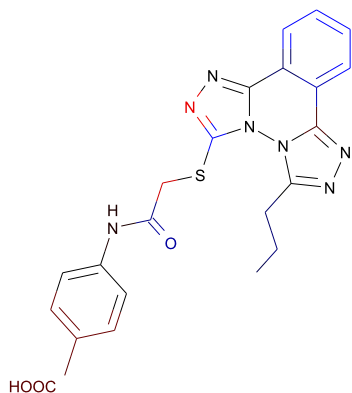
 $C_{22}H_{19}N_7O_3S$ 

Molecular Weight: 461.49635

ALogP: 3.42

Rotatable Bonds: 7

Acceptors: 8

Donors: 2

### Model Prediction

Prediction: 8.9

Unit: mg/kg\_body\_weight/day

Mahalanobis Distance: 12.3

Mahalanobis Distance p-value: 5.52e-006

Mahalanobis Distance: The Mahalanobis distance (MD) is a generalization of the Euclidean distance that accounts for correlations among the X properties. It is calculated as the distance to the center of the training data. The larger the MD, the less trustworthy the prediction.

Mahalanobis Distance p-value: The p-value gives the fraction of training data with an MD greater than or equal to the one for the given sample, assuming normally distributed data. The smaller the p-value, the less trustworthy the prediction. For highly non-normal X properties (e.g., fingerprints), the MD p-value is wildly inaccurate.

### Structural Similar Compounds

| Name                        | 223     | 420     | Salicylazosulfapyridine |
|-----------------------------|---------|---------|-------------------------|
| Structure                   |         |         |                         |
| Actual Endpoint (-log C)    | 5.08368 | 2.78302 | 2.5034                  |
| Predicted Endpoint (-log C) | 5.08273 | 3.31546 | 3.54214                 |
| Distance                    | 0.966   | 0.993   | 0.997                   |
| Reference                   | CPDB    | CPDB    | CPDB                    |

### Model Applicability

Unknown features are fingerprint features in the query molecule, but not found or appearing too infrequently in the training set.

1. All properties and OPS components are within expected ranges.
2. Unknown ECFP\_2 feature: 1986731747: [\*]S[c]1:n:[\*]:[\*]:n:1:[\*]
3. Unknown ECFP\_2 feature: -435188506: [\*]C[c]1:n:[\*]:[\*]:n:1:[\*]
4. Unknown ECFP\_2 feature: 78665610: [\*][c]1:[\*]:[\*]:[c](:[\*]):n:1:n(:[\*]):[\*]

### Feature Contribution

#### Top features for positive contribution

| Fingerprint | Bit/Smiles | Feature Structure | Score |
|-------------|------------|-------------------|-------|
| ECFP_6      | 655739385  | <br>[*]:n:[*]     | 0.229 |

|                                               |                   |                                                                                                                          |              |
|-----------------------------------------------|-------------------|--------------------------------------------------------------------------------------------------------------------------|--------------|
| ECFP_6                                        | 1559650422        | 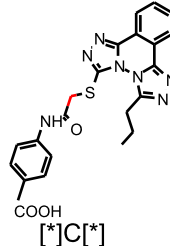<br>[*]C[*]                           | 0.203        |
| ECFP_6                                        | -175146122        | <br>[*]C(=[*])[c](:[cH]:[*]):[cH]:[*] | 0.107        |
| <b>Top Features for negative contribution</b> |                   |                                                                                                                          |              |
| <b>Fingerprint</b>                            | <b>Bit/Smiles</b> | <b>Feature Structure</b>                                                                                                 | <b>Score</b> |
| ECFP_6                                        | 1996767644        | <br>[*]:[cH]:[cH]:[c](:[*]):[*]       | -0.251       |
| ECFP_6                                        | 642810091         | <br>[*]:[c](:[*]):[*]                | -0.247       |
| ECFP_6                                        | -182236392        | <br>[*]:[cH]:[*]                    | -0.232       |



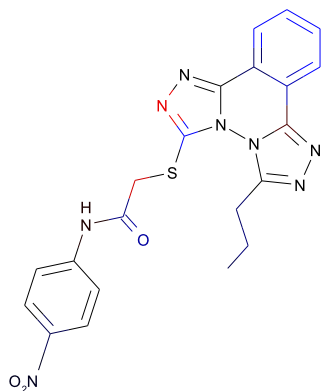

$C_{21}H_{18}N_8O_3S$

Molecular Weight: 462.48441

ALogP: 3.685

Rotatable Bonds: 7

Acceptors: 8

Donors: 1

### Model Prediction

Prediction: 8.57

Unit: mg/kg\_body\_weight/day

Mahalanobis Distance: 11.7

Mahalanobis Distance p-value: 9.42e-005

Mahalanobis Distance: The Mahalanobis distance (MD) is a generalization of the Euclidean distance that accounts for correlations among the X properties. It is calculated as the distance to the center of the training data. The larger the MD, the less trustworthy the prediction.

Mahalanobis Distance p-value: The p-value gives the fraction of training data with an MD greater than or equal to the one for the given sample, assuming normally distributed data. The smaller the p-value, the less trustworthy the prediction. For highly non-normal X properties (e.g., fingerprints), the MD p-value is wildly inaccurate.

### Structural Similar Compounds

| Name                        | 223     | Azathioprine s | 420     |
|-----------------------------|---------|----------------|---------|
| Structure                   |         |                |         |
| Actual Endpoint (-log C)    | 5.08368 | 4.49253        | 2.78302 |
| Predicted Endpoint (-log C) | 5.08273 | 4.28607        | 3.31546 |
| Distance                    | 0.968   | 0.975          | 0.979   |
| Reference                   | CPDB    | CPDB           | CPDB    |

### Model Applicability

Unknown features are fingerprint features in the query molecule, but not found or appearing too infrequently in the training set.

1. All properties and OPS components are within expected ranges.
2. Unknown ECFP\_2 feature: 1986731747: [\*]S[c]1:n:[\*]:[\*]:n:1:[\*]
3. Unknown ECFP\_2 feature: -435188506: [\*]C[c]1:n:[\*]:[\*]:n:1:[\*]
4. Unknown ECFP\_2 feature: 78665610: [\*][c]1:[\*]:[\*]:[c](:[\*]):n:1:n(:[\*]):[\*]

### Feature Contribution

#### Top features for positive contribution

| Fingerprint | Bit/Smiles | Feature Structure | Score |
|-------------|------------|-------------------|-------|
| ECFP_6      | 655739385  | <br>[*]:n:[*]     | 0.229 |

|                                               |                   |                                                                                                                        |              |
|-----------------------------------------------|-------------------|------------------------------------------------------------------------------------------------------------------------|--------------|
| ECFP_6                                        | 1559650422        | 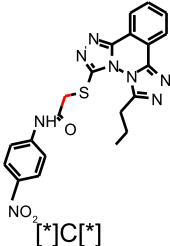<br>[*][C*]                         | 0.203        |
| ECFP_6                                        | 781519895         | <br>[*][O-]                         | 0.0797       |
| <b>Top Features for negative contribution</b> |                   |                                                                                                                        |              |
| <b>Fingerprint</b>                            | <b>Bit/Smiles</b> | <b>Feature Structure</b>                                                                                               | <b>Score</b> |
| ECFP_6                                        | 1996767644        | <br>[*]:[cH]q[cH]:[c](:[*]<br>):[*] | -0.251       |
| ECFP_6                                        | 642810091         | <br>[*]:[c](:[*]):[*]              | -0.247       |
| ECFP_6                                        | -182236392        | <br>[*]:[cH]:[*]                  | -0.232       |



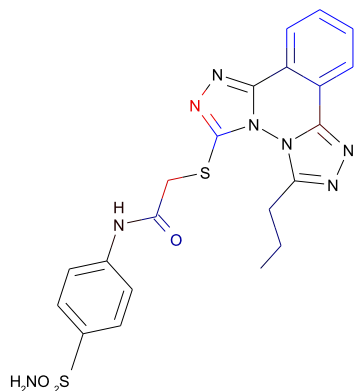
 $C_{21}H_{20}N_8O_3S_2$ 

Molecular Weight: 496.56529

ALogP: 2.496

Rotatable Bonds: 7

Acceptors: 8

Donors: 2

### Model Prediction

Prediction: 5.54

Unit: mg/kg\_body\_weight/day

Mahalanobis Distance: 12.4

Mahalanobis Distance p-value: 2.36e-006

Mahalanobis Distance: The Mahalanobis distance (MD) is a generalization of the Euclidean distance that accounts for correlations among the X properties. It is calculated as the distance to the center of the training data. The larger the MD, the less trustworthy the prediction.

Mahalanobis Distance p-value: The p-value gives the fraction of training data with an MD greater than or equal to the one for the given sample, assuming normally distributed data. The smaller the p-value, the less trustworthy the prediction. For highly non-normal X properties (e.g., fingerprints), the MD p-value is wildly inaccurate.

### Structural Similar Compounds

| Name                        | 420     | Salicylazosulfapyridine | Azathioprine s |
|-----------------------------|---------|-------------------------|----------------|
| Structure                   |         |                         |                |
| Actual Endpoint (-log C)    | 2.78302 | 2.5034                  | 4.49253        |
| Predicted Endpoint (-log C) | 3.31546 | 3.54214                 | 4.28607        |
| Distance                    | 0.936   | 1.012                   | 1.033          |
| Reference                   | CPDB    | CPDB                    | CPDB           |

### Model Applicability

Unknown features are fingerprint features in the query molecule, but not found or appearing too infrequently in the training set.

1. All properties and OPS components are within expected ranges.
2. Unknown ECFP\_2 feature: 1986731747: [\*]S[c]1:n:[\*]:[\*]:n:1:[\*]
3. Unknown ECFP\_2 feature: -435188506: [\*]C[c]1:n:[\*]:[\*]:n:1:[\*]
4. Unknown ECFP\_2 feature: 78665610: [\*][c]1:[\*]:[\*]:[c](:[\*]):n:1:n(:[\*]):[\*]

### Feature Contribution

#### Top features for positive contribution

| Fingerprint | Bit/Smiles | Feature Structure                                | Score |
|-------------|------------|--------------------------------------------------|-------|
| ECFP_6      | 655739385  | <br>SO <sub>2</sub> NH <sub>2</sub><br>[*]:n:[*] | 0.229 |

|                                               |                   |                                                                                       |              |
|-----------------------------------------------|-------------------|---------------------------------------------------------------------------------------|--------------|
| ECFP_6                                        | 1572579716        | 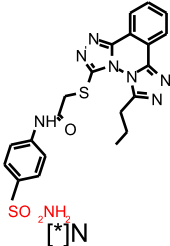   | 0.225        |
| ECFP_6                                        | 1559650422        |    | 0.203        |
| <b>Top Features for negative contribution</b> |                   |                                                                                       |              |
| <b>Fingerprint</b>                            | <b>Bit/Smiles</b> | <b>Feature Structure</b>                                                              | <b>Score</b> |
| ECFP_6                                        | 1996767644        |    | -0.251       |
| ECFP_6                                        | 642810091         |   | -0.247       |
| ECFP_6                                        | 182236392         |  | -0.232       |





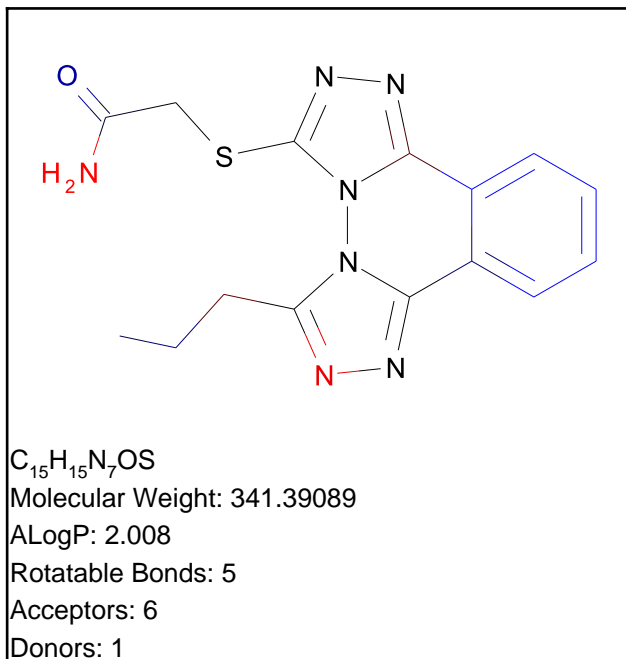

### Model Prediction

Prediction: 14.9

Unit: mg/kg\_body\_weight/day

Mahalanobis Distance: 10.7

Mahalanobis Distance p-value: 0.00395

Mahalanobis Distance: The Mahalanobis distance (MD) is a generalization of the Euclidean distance that accounts for correlations among the X properties. It is calculated as the distance to the center of the training data. The larger the MD, the less trustworthy the prediction.

Mahalanobis Distance p-value: The p-value gives the fraction of training data with an MD greater than or equal to the one for the given sample, assuming normally distributed data. The smaller the p-value, the less trustworthy the prediction. For highly non-normal X properties (e.g., fingerprints), the MD p-value is wildly inaccurate.

### Structural Similar Compounds

| Name                        | Azathioprine s                                                                      | 646                                                                                 | 470                                                                                 |
|-----------------------------|-------------------------------------------------------------------------------------|-------------------------------------------------------------------------------------|-------------------------------------------------------------------------------------|
| Structure                   | 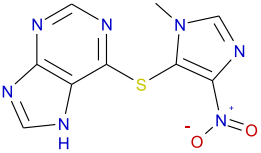 |  |  |
| Actual Endpoint (-log C)    | 4.49253                                                                             | 0.937339                                                                            | 4.62839                                                                             |
| Predicted Endpoint (-log C) | 4.28607                                                                             | 3.26294                                                                             | 3.93264                                                                             |
| Distance                    | 0.724                                                                               | 0.810                                                                               | 0.814                                                                               |
| Reference                   | CPDB                                                                                | CPDB                                                                                | CPDB                                                                                |

### Model Applicability

Unknown features are fingerprint features in the query molecule, but not found or appearing too infrequently in the training set.

1. All properties and OPS components are within expected ranges.
2. Unknown ECFP\_2 feature: 78665610: [\*][c]1:[\*]:[\*]:[c](:[\*]):n:1:n(:[\*]):[\*]
3. Unknown ECFP\_2 feature: -435188506: [\*]C[c]1:n:[\*]:[\*]:n:1:[\*]
4. Unknown ECFP\_2 feature: 1986731747: [\*]S[c]1:n:[\*]:[\*]:n:1:[\*]

### Feature Contribution

#### Top features for positive contribution

| Fingerprint | Bit/Smiles | Feature Structure                                                                                  | Score |
|-------------|------------|----------------------------------------------------------------------------------------------------|-------|
| ECFP_6      | 655739385  | 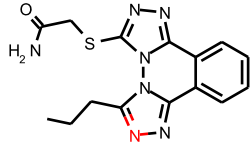<br>[*]:n:[*] | 0.229 |

|                                               |                   |                                                                                                                        |              |
|-----------------------------------------------|-------------------|------------------------------------------------------------------------------------------------------------------------|--------------|
| ECFP_6                                        | 1572579716        | 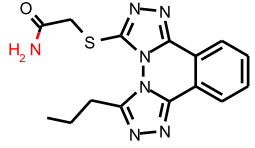<br>[*]N                            | 0.225        |
| ECFP_6                                        | 1559650422        | <br>[*]C[*]                         | 0.203        |
| <b>Top Features for negative contribution</b> |                   |                                                                                                                        |              |
| <b>Fingerprint</b>                            | <b>Bit/Smiles</b> | <b>Feature Structure</b>                                                                                               | <b>Score</b> |
| ECFP_6                                        | 1996767644        | <br>[*]:[cH]:[cH]:[c](:[*]<br>):[*] | -0.251       |
| ECFP_6                                        | 642810091         | <br>[*]:[c](:[*]):[*]             | -0.247       |
| ECFP_6                                        | 182236392         | <br>[*]:[cH]:[*]                  | -0.232       |



# Doxorubicin

# TOPKAT\_Carcinogenic\_Potency\_TD50\_Mouse

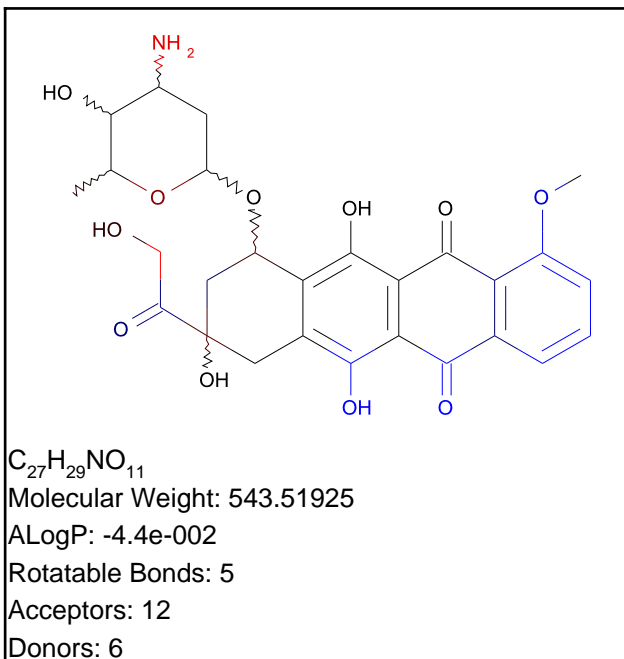

## Model Prediction

Prediction: 11.2

Unit: mg/kg\_body\_weight/day

Mahalanobis Distance: 16.6

Mahalanobis Distance p-value: 3.86e-018

Mahalanobis Distance: The Mahalanobis distance (MD) is a generalization of the Euclidean distance that accounts for correlations among the X properties. It is calculated as the distance to the center of the training data. The larger the MD, the less trustworthy the prediction.

Mahalanobis Distance p-value: The p-value gives the fraction of training data with an MD greater than or equal to the one for the given sample, assuming normally distributed data. The smaller the p-value, the less trustworthy the prediction. For highly non-normal X properties (e.g., fingerprints), the MD p-value is wildly inaccurate.

## Structural Similar Compounds

| Name                        | 532                                                                                 | 338                                                                                 | 380                                                                                 |
|-----------------------------|-------------------------------------------------------------------------------------|-------------------------------------------------------------------------------------|-------------------------------------------------------------------------------------|
| Structure                   | 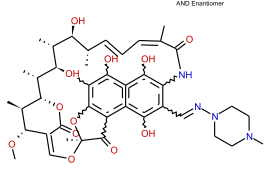 |  |  |
| Actual Endpoint (-log C)    | 4.38903                                                                             | 4.39533                                                                             | 4.48977                                                                             |
| Predicted Endpoint (-log C) | 5.60554                                                                             | 4.31268                                                                             | 6.22716                                                                             |
| Distance                    | 0.909                                                                               | 0.937                                                                               | 0.952                                                                               |
| Reference                   | CPDB                                                                                | CPDB                                                                                | CPDB                                                                                |

## Model Applicability

Unknown features are fingerprint features in the query molecule, but not found or appearing too infrequently in the training set.

1. All properties and OPS components are within expected ranges.
2. Unknown ECFP\_2 feature: 140080459: [\*]CC(O)(C[\*])C(=[\*])[\*]
3. Unknown ECFP\_2 feature: 456242574: [\*]C([\*])OC([\*])[\*]
4. Unknown ECFP\_2 feature: -1783281539: [\*]CC(=O)C([\*])([\*])[\*]
5. Unknown ECFP\_2 feature: -1907393688: [\*]C(=[\*])CO
6. Unknown ECFP\_2 feature: 1535429263: [\*]OC(C)[\*][\*]
7. Unknown ECFP\_2 feature: 1201786014: [\*]CC(N)C([\*])[\*]
8. Unknown ECFP\_2 feature: -932844120: [\*]C([\*])N
9. Unknown ECFP\_2 feature: -2061744983: [\*]CC(O[\*])O[\*]

## Feature Contribution

### Top features for positive contribution

| Fingerprint | Bit/Smiles | Feature Structure | Score |
|-------------|------------|-------------------|-------|
|             |            |                   |       |

| ECFP_6                                 | 1572579716 | 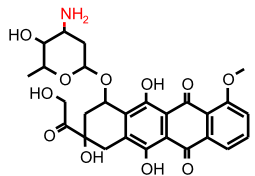<br>[*]N             | 0.225  |
|----------------------------------------|------------|---------------------------------------------------------------------------------------------------------|--------|
| ECFP_6                                 | 1559650422 | <br>[*]C[*]          | 0.203  |
| ECFP_6                                 | 683445015  | <br>[*]O[*]          | 0.136  |
| Top Features for negative contribution |            |                                                                                                         |        |
| Fingerprint                            | Bit/Smiles | Feature Structure                                                                                       | Score  |
| ECFP_6                                 | 2106656448 | <br>[*]C(=O)[*]    | -0.275 |
| ECFP_6                                 | 2019062761 | <br>[*]:[c](:[*])O | -0.258 |

|        |            |                                                                                                                                                           |        |
|--------|------------|-----------------------------------------------------------------------------------------------------------------------------------------------------------|--------|
| ECFP_6 | 1996767644 | 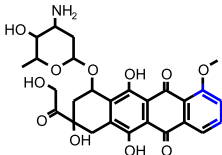 <p data-bbox="1392 280 1570 337">[*]:[cH]:[cH]:[c](:[*]<br/>):[*]</p> | -0.251 |
|--------|------------|-----------------------------------------------------------------------------------------------------------------------------------------------------------|--------|

7a

TOPKAT\_Carcinogenic\_Potency\_TD50\_Rat

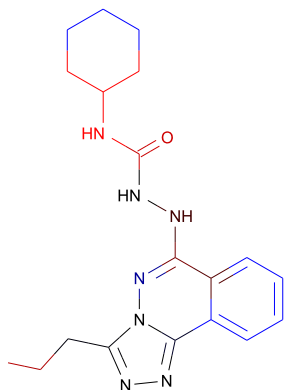C<sub>19</sub>H<sub>25</sub>N<sub>7</sub>O

Molecular Weight: 367.44809

ALogP: 3.681

Rotatable Bonds: 5

Acceptors: 5

Donors: 3

**Model Prediction**

Prediction: 0.651

Unit: mg/kg\_body\_weight/day

Mahalanobis Distance: 14.7

Mahalanobis Distance p-value: 2.78e-010

Mahalanobis Distance: The Mahalanobis distance (MD) is a generalization of the Euclidean distance that accounts for correlations among the X properties. It is calculated as the distance to the center of the training data. The larger the MD, the less trustworthy the prediction.

Mahalanobis Distance p-value: The p-value gives the fraction of training data with an MD greater than or equal to the one for the given sample, assuming normally distributed data. The smaller the p-value, the less trustworthy the prediction. For highly non-normal X properties (e.g., fingerprints), the MD p-value is wildly inaccurate.

**Structural Similar Compounds**

| Name                        | 542     | Ochratoxin A | Fluvastatin |
|-----------------------------|---------|--------------|-------------|
| Structure                   |         |              |             |
| Actual Endpoint (-log C)    | 6.59334 | 6.47264      | 3.51742     |
| Predicted Endpoint (-log C) | 5.06501 | 5.06501      | 5.41573     |
| Distance                    | 0.659   | 0.659        | 0.675       |
| Reference                   | CPDB    | CPDB         | CPDB        |

**Model Applicability**

Unknown features are fingerprint features in the query molecule, but not found or appearing too infrequently in the training set.

1. All properties and OPS components are within expected ranges.

**Feature Contribution****Top features for positive contribution**

| Fingerprint | Bit/Smiles  | Feature Structure   | Score |
|-------------|-------------|---------------------|-------|
| FCFP_6      | -1043250487 | <br>[*]CC(C[*])N[*] | 1.15  |



|                                               |                   |                                                                                                                                  |              |
|-----------------------------------------------|-------------------|----------------------------------------------------------------------------------------------------------------------------------|--------------|
| FCFP_6                                        | 1                 | 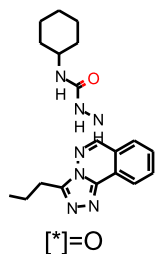<br>[*]=O                                      | 0.234        |
| FCFP_6                                        | -885550502        | <br>[*]C[*]NC(=[*])[*]                        | 0.229        |
| <b>Top Features for negative contribution</b> |                   |                                                                                                                                  |              |
| <b>Fingerprint</b>                            | <b>Bit/Smiles</b> | <b>Feature Structure</b>                                                                                                         | <b>Score</b> |
| FCFP_6                                        | 1175638033        | <br>[*]C1[*]CCCC1                             | -0.512       |
| FCFP_6                                        | 991735244         | <br>[*]:[c]1:[*]:[cH]:[cH]<br>]:[cH]:[cH]:1 | -0.422       |
| FCFP_6                                        | 16                | <br>[*]:[cH]:[*]                            | -0.354       |





|                                               |                   |                                                                                                                                                 |              |
|-----------------------------------------------|-------------------|-------------------------------------------------------------------------------------------------------------------------------------------------|--------------|
| FCFP_6                                        | 307419094         | 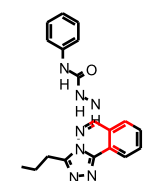<br><chem>[*][c](-[*]):[c](-[cH]):-[*]):[c](-[*]):[*]</chem> | 0.121        |
| FCFP_6                                        | -1272798659       | <br><chem>[*]CCC</chem>                                      | 0.11         |
| <b>Top Features for negative contribution</b> |                   |                                                                                                                                                 |              |
| <b>Fingerprint</b>                            | <b>Bit/Smiles</b> | <b>Feature Structure</b>                                                                                                                        | <b>Score</b> |
| FCFP_6                                        | 991735244         | <br><chem>[*]:[c]1:[*]:[cH]:[cH]):-[cH]:[cH]:1</chem>        | -0.422       |
| FCFP_6                                        | -2093839777       | <br><chem>[*][c]1:[cH]:[cH]:[cH]):-[cH]:[cH]:1</chem>       | -0.378       |
| FCFP_6                                        | 16                | <br><chem>[*]:[cH]:[*]</chem>                              | -0.354       |



8a

TOPKAT\_Carcinogenic\_Potency\_TD50\_Rat

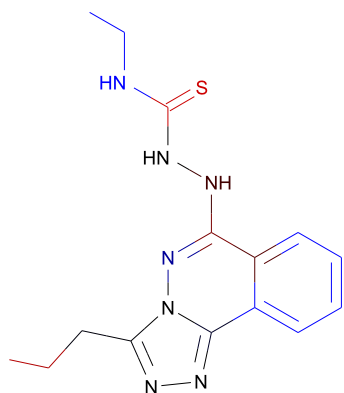C<sub>15</sub>H<sub>19</sub>N<sub>7</sub>S

Molecular Weight: 329.42325

ALogP: 3.388

Rotatable Bonds: 7

Acceptors: 5

Donors: 3

### Model Prediction

Prediction: 34.6

Unit: mg/kg\_body\_weight/day

Mahalanobis Distance: 12.8

Mahalanobis Distance p-value: 1.55e-005

Mahalanobis Distance: The Mahalanobis distance (MD) is a generalization of the Euclidean distance that accounts for correlations among the X properties. It is calculated as the distance to the center of the training data. The larger the MD, the less trustworthy the prediction.

Mahalanobis Distance p-value: The p-value gives the fraction of training data with an MD greater than or equal to the one for the given sample, assuming normally distributed data. The smaller the p-value, the less trustworthy the prediction. For highly non-normal X properties (e.g., fingerprints), the MD p-value is wildly inaccurate.

### Structural Similar Compounds

| Name                        | 4-(2-Hydroxyethylamino)-2-(5-nitro-2-thienyl)quinazoline | 4-Chloro-6-(2,3-xylidino)-2-pyrimidinylthio(N-b-hydroxy-ethyl) acetamide | Fluvastatin |
|-----------------------------|----------------------------------------------------------|--------------------------------------------------------------------------|-------------|
| Structure                   |                                                          |                                                                          |             |
| Actual Endpoint (-log C)    | 5.22831                                                  | 4.75226                                                                  | 3.51742     |
| Predicted Endpoint (-log C) | 4.31976                                                  | 3.29421                                                                  | 5.41573     |
| Distance                    | 0.623                                                    | 0.629                                                                    | 0.638       |
| Reference                   | CPDB                                                     | CPDB                                                                     | CPDB        |

### Model Applicability

Unknown features are fingerprint features in the query molecule, but not found or appearing too infrequently in the training set.

- All properties and OPS components are within expected ranges.

### Feature Contribution

#### Top features for positive contribution

| Fingerprint | Bit/Smiles | Feature Structure | Score |
|-------------|------------|-------------------|-------|
| FCFP_6      | 1          |                   | 0.234 |

|                                               |                   |                                                                                                                                                      |              |
|-----------------------------------------------|-------------------|------------------------------------------------------------------------------------------------------------------------------------------------------|--------------|
| FCFP_6                                        | -885550502        | 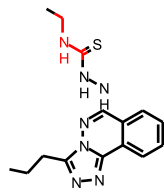<br><chem>[*]C([*])NC(=[*])[*]</chem>                             | 0.229        |
| FCFP_6                                        | 307419094         | <br><chem>[*][c](:[*]):[c](:[cH] <br/> :[*]):[c](:[*]):[*]</chem> | 0.121        |
| <b>Top Features for negative contribution</b> |                   |                                                                                                                                                      |              |
| <b>Fingerprint</b>                            | <b>Bit/Smiles</b> | <b>Feature Structure</b>                                                                                                                             | <b>Score</b> |
| FCFP_6                                        | -1272709286       | <br><chem>[*]NCC</chem>                                           | -0.526       |
| FCFP_6                                        | 991735244         | <br><chem>[*]:[c]1:[*]:[cH]:[cH] <br/> ]:[cH]:[cH]:1</chem>     | -0.422       |
| FCFP_6                                        | 16                | <br><chem>[*]:[cH]:[*]</chem>                                   | -0.354       |





8b

TOPKAT\_Carcinogenic\_Potency\_TD50\_Rat

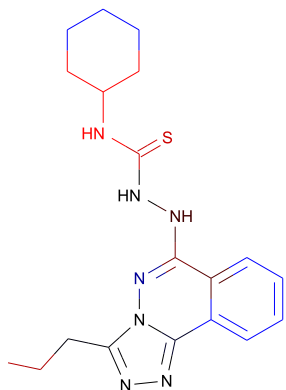C<sub>19</sub>H<sub>25</sub>N<sub>7</sub>S

Molecular Weight: 383.51369

ALogP: 4.898

Rotatable Bonds: 7

Acceptors: 5

Donors: 3

**Model Prediction**

Prediction: 0.873

Unit: mg/kg\_body\_weight/day

Mahalanobis Distance: 14.4

Mahalanobis Distance p-value: 1.34e-009

Mahalanobis Distance: The Mahalanobis distance (MD) is a generalization of the Euclidean distance that accounts for correlations among the X properties. It is calculated as the distance to the center of the training data. The larger the MD, the less trustworthy the prediction.

Mahalanobis Distance p-value: The p-value gives the fraction of training data with an MD greater than or equal to the one for the given sample, assuming normally distributed data. The smaller the p-value, the less trustworthy the prediction. For highly non-normal X properties (e.g., fingerprints), the MD p-value is wildly inaccurate.

**Structural Similar Compounds**

| Name                        | 913     | Fluvastatin | 542     |
|-----------------------------|---------|-------------|---------|
| Structure                   |         |             |         |
| Actual Endpoint (-log C)    | 3.51742 | 3.51742     | 6.59334 |
| Predicted Endpoint (-log C) | 5.41573 | 5.41573     | 5.06501 |
| Distance                    | 0.618   | 0.618       | 0.671   |
| Reference                   | CPDB    | CPDB        | CPDB    |

**Model Applicability**

Unknown features are fingerprint features in the query molecule, but not found or appearing too infrequently in the training set.

1. All properties and OPS components are within expected ranges.

**Feature Contribution****Top features for positive contribution**

| Fingerprint | Bit/Smiles  | Feature Structure   | Score |
|-------------|-------------|---------------------|-------|
| FCFP_6      | -1043250487 | <br>[*]CC(C[*])N[*] | 1.15  |

|                                               |                   |                                                                                                                                  |              |
|-----------------------------------------------|-------------------|----------------------------------------------------------------------------------------------------------------------------------|--------------|
| FCFP_6                                        | 1                 | 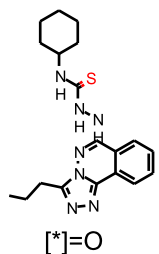<br>[*]=O                                      | 0.234        |
| FCFP_6                                        | -885550502        | <br>[*]C[*]NC(=O)[*]                          | 0.229        |
| <b>Top Features for negative contribution</b> |                   |                                                                                                                                  |              |
| <b>Fingerprint</b>                            | <b>Bit/Smiles</b> | <b>Feature Structure</b>                                                                                                         | <b>Score</b> |
| FCFP_6                                        | 1175638033        | <br>[*]C1[*]CCCC1                             | -0.512       |
| FCFP_6                                        | 991735244         | <br>[*]:[c]1:[*]:[cH]:[cH]<br>]:[cH]:[cH]:1 | -0.422       |
| FCFP_6                                        | 16                | <br>[*]:[cH]:[*]                            | -0.354       |



9a

TOPKAT\_Carcinogenic\_Potency\_TD50\_Rat

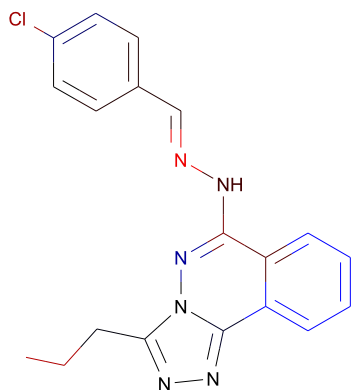

$C_{19}H_{17}ClN_6$   
 Molecular Weight: 364.83147  
 ALogP: 4.967  
 Rotatable Bonds: 5  
 Acceptors: 5  
 Donors: 1

### Model Prediction

Prediction: 2.51  
 Unit: mg/kg\_body\_weight/day  
 Mahalanobis Distance: 13.1  
 Mahalanobis Distance p-value: 3.12e-006

Mahalanobis Distance: The Mahalanobis distance (MD) is a generalization of the Euclidean distance that accounts for correlations among the X properties. It is calculated as the distance to the center of the training data. The larger the MD, the less trustworthy the prediction.

Mahalanobis Distance p-value: The p-value gives the fraction of training data with an MD greater than or equal to the one for the given sample, assuming normally distributed data. The smaller the p-value, the less trustworthy the prediction. For highly non-normal X properties (e.g., fingerprints), the MD p-value is wildly inaccurate.

### Structural Similar Compounds

| Name                        | Indomethacin | 646     | Omeprazole |
|-----------------------------|--------------|---------|------------|
| Structure                   |              |         |            |
| Actual Endpoint (-log C)    | 5.49293      | 2.41938 | 3.4628     |
| Predicted Endpoint (-log C) | 4.9569       | 3.77987 | 4.7324     |
| Distance                    | 0.621        | 0.680   | 0.711      |
| Reference                   | CPDB         | CPDB    | CPDB       |

### Model Applicability

Unknown features are fingerprint features in the query molecule, but not found or appearing too infrequently in the training set.

1. All properties and OPS components are within expected ranges.

### Feature Contribution

#### Top features for positive contribution

| Fingerprint | Bit/Smiles | Feature Structure | Score |
|-------------|------------|-------------------|-------|
| FCFP_6      | 1          |                   | 0.234 |

|                                               |                   |                                                                                                                                |              |
|-----------------------------------------------|-------------------|--------------------------------------------------------------------------------------------------------------------------------|--------------|
| FCFP_6                                        | 32                | 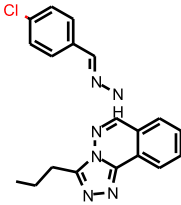<br>[*]Cl                                   | 0.154        |
| FCFP_6                                        | 203677720         | <br>[*]=C[c](:[cH]:[*]):[cH]:[*]            | 0.137        |
| <b>Top Features for negative contribution</b> |                   |                                                                                                                                |              |
| <b>Fingerprint</b>                            | <b>Bit/Smiles</b> | <b>Feature Structure</b>                                                                                                       | <b>Score</b> |
| FCFP_6                                        | 991735244         | <br>[*]:[c]1:[*]:[cH]:[cH]<br>]:[cH]:[cH]:1 | -0.422       |
| FCFP_6                                        | 16                | <br>[*]:[cH]:[*]                           | -0.354       |
| FCFP_6                                        | 17                | <br>[*]:n:[*]                             | -0.149       |



9b

TOPKAT\_Carcinogenic\_Potency\_TD50\_Rat

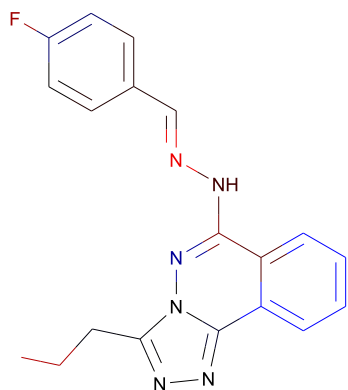C<sub>19</sub>H<sub>17</sub>FN<sub>6</sub>

Molecular Weight: 348.37688

ALogP: 4.508

Rotatable Bonds: 5

Acceptors: 5

Donors: 1

### Model Prediction

Prediction: 2.67

Unit: mg/kg\_body\_weight/day

Mahalanobis Distance: 13.2

Mahalanobis Distance p-value: 2.07e-006

Mahalanobis Distance: The Mahalanobis distance (MD) is a generalization of the Euclidean distance that accounts for correlations among the X properties. It is calculated as the distance to the center of the training data. The larger the MD, the less trustworthy the prediction.

Mahalanobis Distance p-value: The p-value gives the fraction of training data with an MD greater than or equal to the one for the given sample, assuming normally distributed data. The smaller the p-value, the less trustworthy the prediction. For highly non-normal X properties (e.g., fingerprints), the MD p-value is wildly inaccurate.

### Structural Similar Compounds

| Name                        | Indomethacin | 646     | Bemitradine |
|-----------------------------|--------------|---------|-------------|
| Structure                   |              |         |             |
| Actual Endpoint (-log C)    | 5.49293      | 2.41938 | 2.71351     |
| Predicted Endpoint (-log C) | 4.9569       | 3.77987 | 4.65043     |
| Distance                    | 0.616        | 0.681   | 0.688       |
| Reference                   | CPDB         | CPDB    | CPDB        |

### Model Applicability

Unknown features are fingerprint features in the query molecule, but not found or appearing too infrequently in the training set.

1. All properties and OPS components are within expected ranges.

### Feature Contribution

#### Top features for positive contribution

| Fingerprint | Bit/Smiles | Feature Structure | Score |
|-------------|------------|-------------------|-------|
| FCFP_6      | 1          |                   | 0.234 |

|                                               |                   |                                                                                                                                |              |
|-----------------------------------------------|-------------------|--------------------------------------------------------------------------------------------------------------------------------|--------------|
| FCFP_6                                        | 32                | 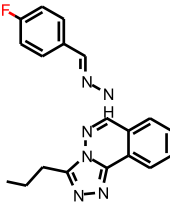<br>[*]Cl                                   | 0.154        |
| FCFP_6                                        | 203677720         | <br>[*]=C[c](:[cH]:[*]):[cH]:[*]            | 0.137        |
| <b>Top Features for negative contribution</b> |                   |                                                                                                                                |              |
| <b>Fingerprint</b>                            | <b>Bit/Smiles</b> | <b>Feature Structure</b>                                                                                                       | <b>Score</b> |
| FCFP_6                                        | 991735244         | <br>[*]:[c]1:[*]:[cH]:[cH]<br>]:[cH]:[cH]:1 | -0.422       |
| FCFP_6                                        | 16                | <br>[*]:[cH]:[*]                           | -0.354       |
| FCFP_6                                        | 17                | <br>[*]:n:[*]                             | -0.149       |





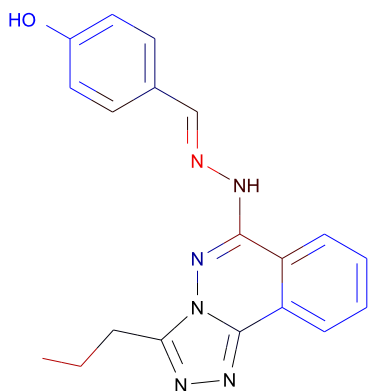

$C_{19}H_{18}N_6O$

Molecular Weight: 346.38582

ALogP: 4.061

Rotatable Bonds: 5

Acceptors: 6

Donors: 2

### Model Prediction

Prediction: 20.5

Unit: mg/kg\_body\_weight/day

Mahalanobis Distance: 13.1

Mahalanobis Distance p-value: 2.81e-006

Mahalanobis Distance: The Mahalanobis distance (MD) is a generalization of the Euclidean distance that accounts for correlations among the X properties. It is calculated as the distance to the center of the training data. The larger the MD, the less trustworthy the prediction.

Mahalanobis Distance p-value: The p-value gives the fraction of training data with an MD greater than or equal to the one for the given sample, assuming normally distributed data. The smaller the p-value, the less trustworthy the prediction. For highly non-normal X properties (e.g., fingerprints), the MD p-value is wildly inaccurate.

### Structural Similar Compounds

| Name                        | Phenolphthalein | 646     | Omeprazole |
|-----------------------------|-----------------|---------|------------|
| Structure                   |                 |         |            |
| Actual Endpoint (-log C)    | 2.54766         | 2.41938 | 3.4628     |
| Predicted Endpoint (-log C) | 3.7508          | 3.77987 | 4.7324     |
| Distance                    | 0.671           | 0.680   | 0.698      |
| Reference                   | CPDB            | CPDB    | CPDB       |

### Model Applicability

Unknown features are fingerprint features in the query molecule, but not found or appearing too infrequently in the training set.

- OPS PC7 out of range. Value: 6.5394. Training min, max, SD, explained variance: -5.0422, 6.1749, 1.868, 0.0335.

### Feature Contribution

#### Top features for positive contribution

| Fingerprint | Bit/Smiles | Feature Structure | Score |
|-------------|------------|-------------------|-------|
| FCFP_6      | 1          |                   | 0.234 |

|                                               |                   |                                                                                                                                               |              |
|-----------------------------------------------|-------------------|-----------------------------------------------------------------------------------------------------------------------------------------------|--------------|
| FCFP_6                                        | 203677720         | 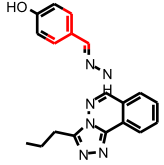<br><chem>[*]=C[c](:[cH]:[*]):[cH]:[*]</chem>              | 0.137        |
| FCFP_6                                        | 307419094         | <br><chem>[*][c](:[*]):[c](:[cH]:[*]):[c](:[*]):[*]</chem> | 0.121        |
| <b>Top Features for negative contribution</b> |                   |                                                                                                                                               |              |
| <b>Fingerprint</b>                            | <b>Bit/Smiles</b> | <b>Feature Structure</b>                                                                                                                      | <b>Score</b> |
| FCFP_6                                        | 991735244         | <br><chem>[*]:[c]1:[*]:[cH]:[cH]:[cH]:[cH]:1</chem>        | -0.422       |
| FCFP_6                                        | 7                 | <br><chem>[*]O</chem>                                     | -0.372       |
| FCFP_6                                        | 16                | <br><chem>[*]:[cH]:[*]</chem>                            | -0.354       |



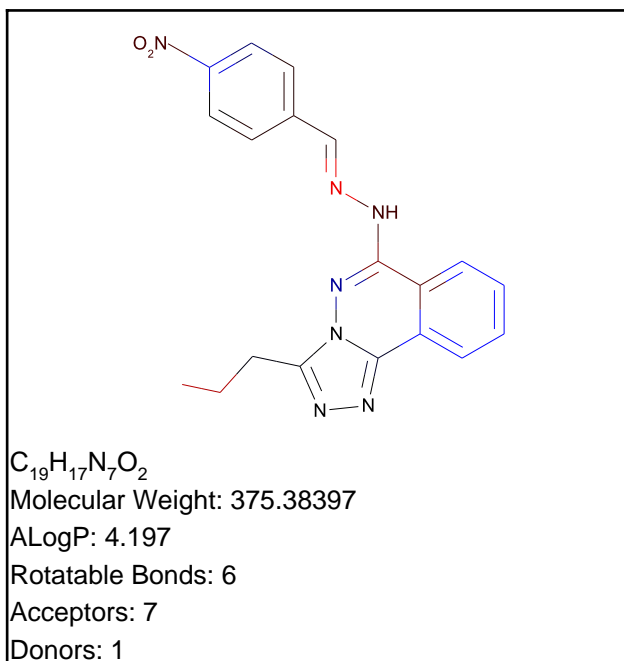

### Model Prediction

Prediction: 1.99

Unit: mg/kg\_body\_weight/day

Mahalanobis Distance: 13.6

Mahalanobis Distance p-value: 1.67e-007

Mahalanobis Distance: The Mahalanobis distance (MD) is a generalization of the Euclidean distance that accounts for correlations among the X properties. It is calculated as the distance to the center of the training data. The larger the MD, the less trustworthy the prediction.

Mahalanobis Distance p-value: The p-value gives the fraction of training data with an MD greater than or equal to the one for the given sample, assuming normally distributed data. The smaller the p-value, the less trustworthy the prediction. For highly non-normal X properties (e.g., fingerprints), the MD p-value is wildly inaccurate.

### Structural Similar Compounds

| Name                        | C.I. direct brown 95                                                                | 4-Morpholino-2-(5-nitro-2-thienyl)quinazoline                                       | 4-Bis(2-hydroxyethyl)amino-2-(5-nitro-2-thienyl)quinazoline                         |
|-----------------------------|-------------------------------------------------------------------------------------|-------------------------------------------------------------------------------------|-------------------------------------------------------------------------------------|
| Structure                   | 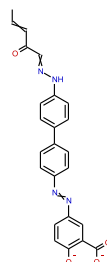 |  |  |
| Actual Endpoint (-log C)    | 5.31387                                                                             | 4.83293                                                                             | 5.05984                                                                             |
| Predicted Endpoint (-log C) | 4.30266                                                                             | 4.97658                                                                             | 4.23808                                                                             |
| Distance                    | 0.677                                                                               | 0.691                                                                               | 0.707                                                                               |
| Reference                   | CPDB                                                                                | CPDB                                                                                | CPDB                                                                                |

### Model Applicability

Unknown features are fingerprint features in the query molecule, but not found or appearing too infrequently in the training set.

- All properties and OPS components are within expected ranges.

### Feature Contribution

#### Top features for positive contribution

| Fingerprint | Bit/Smiles | Feature Structure                                                                                | Score |
|-------------|------------|--------------------------------------------------------------------------------------------------|-------|
| FCFP_6      | 5          | 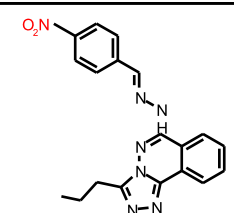<br>[*][O-] | 0.431 |

|                                               |                   |                                                                                                                                |              |
|-----------------------------------------------|-------------------|--------------------------------------------------------------------------------------------------------------------------------|--------------|
| FCFP_6                                        | 8                 | 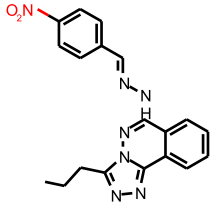<br>[*][N+](=O)[*]                          | 0.336        |
| FCFP_6                                        | 1                 | <br>[*]=O                                   | 0.234        |
| <b>Top Features for negative contribution</b> |                   |                                                                                                                                |              |
| <b>Fingerprint</b>                            | <b>Bit/Smiles</b> | <b>Feature Structure</b>                                                                                                       | <b>Score</b> |
| FCFP_6                                        | 991735244         | <br>[*]:[c]1:[*]:[cH]:[cH]<br>[:[cH]:[cH]:1 | -0.422       |
| FCFP_6                                        | 16                | <br>[*]:[cH]:[*]                          | -0.354       |
| FCFP_6                                        | 1872392852        | <br>[*][N+](=O)[*]                        | -0.155       |







|                                               |                   |                                                                                                                                        |              |
|-----------------------------------------------|-------------------|----------------------------------------------------------------------------------------------------------------------------------------|--------------|
| FCFP_6                                        | 203677720         | 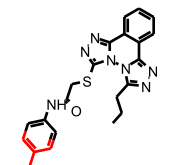<br><chem>[*]=C([c]([*])([cH]:[*]):[cH]:[*])</chem> | 0.137        |
| FCFP_6                                        | -1272768868       | <br><chem>[*]SCC(=[*])[*]</chem>                    | 0.127        |
| <b>Top Features for negative contribution</b> |                   |                                                                                                                                        |              |
| <b>Fingerprint</b>                            | <b>Bit/Smiles</b> | <b>Feature Structure</b>                                                                                                               | <b>Score</b> |
| FCFP_6                                        | 991735244         | <br><chem>[*]:[c]1:[*]:[cH]:[cH]:[cH]:[cH]:1</chem> | -0.422       |
| FCFP_6                                        | 7                 | <br><chem>[*]O</chem>                             | -0.372       |
| FCFP_6                                        | 16                | <br><chem>[*]:[cH]:[*]</chem>                     | -0.354       |



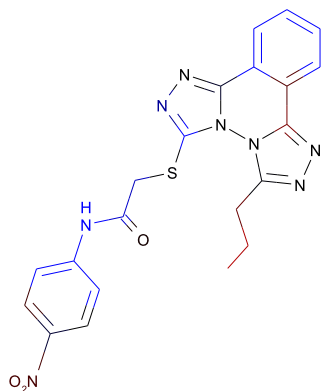

$C_{21}H_{18}N_8O_3S$

Molecular Weight: 462.48441

ALogP: 3.685

Rotatable Bonds: 7

Acceptors: 8

Donors: 1

### Model Prediction

Prediction: 5.43

Unit: mg/kg\_body\_weight/day

Mahalanobis Distance: 17

Mahalanobis Distance p-value: 1.16e-017

Mahalanobis Distance: The Mahalanobis distance (MD) is a generalization of the Euclidean distance that accounts for correlations among the X properties. It is calculated as the distance to the center of the training data. The larger the MD, the less trustworthy the prediction.

Mahalanobis Distance p-value: The p-value gives the fraction of training data with an MD greater than or equal to the one for the given sample, assuming normally distributed data. The smaller the p-value, the less trustworthy the prediction. For highly non-normal X properties (e.g., fingerprints), the MD p-value is wildly inaccurate.

### Structural Similar Compounds

| Name                        | 623     | C.I. direct brown 95 | 4-Bis(2-hydroxyethyl)amino-2-(5-nitro-2-thienyl)quinazoline |
|-----------------------------|---------|----------------------|-------------------------------------------------------------|
| Structure                   |         |                      |                                                             |
| Actual Endpoint (-log C)    | 2.39985 | 5.31387              | 5.05984                                                     |
| Predicted Endpoint (-log C) | 3.4177  | 4.30266              | 4.23808                                                     |
| Distance                    | 0.803   | 0.829                | 0.843                                                       |
| Reference                   | CPDB    | CPDB                 | CPDB                                                        |

### Model Applicability

Unknown features are fingerprint features in the query molecule, but not found or appearing too infrequently in the training set.

- All properties and OPS components are within expected ranges.

### Feature Contribution

#### Top features for positive contribution

| Fingerprint | Bit/Smiles | Feature Structure | Score |
|-------------|------------|-------------------|-------|
| FCFP_6      | 5          |                   | 0.431 |

|                                               |                   |                                                                                                                                              |              |
|-----------------------------------------------|-------------------|----------------------------------------------------------------------------------------------------------------------------------------------|--------------|
| FCFP_6                                        | 8                 | 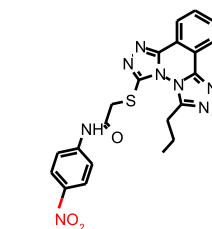<br><chem>[*][N+](=O)[*]</chem>                            | 0.336        |
| FCFP_6                                        | 1                 | <br><chem>[*]=O</chem>                                    | 0.234        |
| <b>Top Features for negative contribution</b> |                   |                                                                                                                                              |              |
| <b>Fingerprint</b>                            | <b>Bit/Smiles</b> | <b>Feature Structure</b>                                                                                                                     | <b>Score</b> |
| FCFP_6                                        | 991735244         | <br><chem>[*]:[c]([*]):[cH]:[cH]<br/>[:[cH]:[cH]:1</chem> | -0.422       |
| FCFP_6                                        | 16                | <br><chem>[*]:[cH]:[*]</chem>                            | -0.354       |
| FCFP_6                                        | 590925877         | <br><chem>[*]N(c([*]cH):[*]):[c<br/>H]:[*]</chem>       | -0.323       |



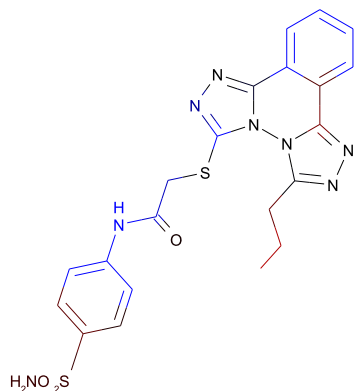

$C_{21}H_{20}N_8O_3S_2$

Molecular Weight: 496.56529

ALogP: 2.496

Rotatable Bonds: 7

Acceptors: 8

Donors: 2

### Model Prediction

Prediction: 22

Unit: mg/kg\_body\_weight/day

Mahalanobis Distance: 15.7

Mahalanobis Distance p-value: 1.78e-013

Mahalanobis Distance: The Mahalanobis distance (MD) is a generalization of the Euclidean distance that accounts for correlations among the X properties. It is calculated as the distance to the center of the training data. The larger the MD, the less trustworthy the prediction.

Mahalanobis Distance p-value: The p-value gives the fraction of training data with an MD greater than or equal to the one for the given sample, assuming normally distributed data. The smaller the p-value, the less trustworthy the prediction. For highly non-normal X properties (e.g., fingerprints), the MD p-value is wildly inaccurate.

### Structural Similar Compounds

| Name                        | 623     | 4-Bis(2-hydroxyethyl)amino-2-(5-nitro-2-thienyl)quinazoline | 418     |
|-----------------------------|---------|-------------------------------------------------------------|---------|
| Structure                   |         |                                                             |         |
| Actual Endpoint (-log C)    | 2.39985 | 5.05984                                                     | 2.9349  |
| Predicted Endpoint (-log C) | 3.4177  | 4.23808                                                     | 3.45907 |
| Distance                    | 0.800   | 0.870                                                       | 0.870   |
| Reference                   | CPDB    | CPDB                                                        | CPDB    |

### Model Applicability

Unknown features are fingerprint features in the query molecule, but not found or appearing too infrequently in the training set.

- All properties and OPS components are within expected ranges.

### Feature Contribution

#### Top features for positive contribution

| Fingerprint | Bit/Smiles | Feature Structure | Score |
|-------------|------------|-------------------|-------|
| FCFP_6      | 1          |                   | 0.234 |

|                                               |                   |                                                                                                                                       |              |
|-----------------------------------------------|-------------------|---------------------------------------------------------------------------------------------------------------------------------------|--------------|
| FCFP_6                                        | 203677720         | 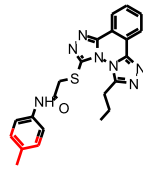<br><chem>[*]C(=O)c(:[cH]:[*]):[cH]:[*]</chem>     | 0.137        |
| FCFP_6                                        | -1272768868       | <br><chem>[*]SCC(=[*])[*]</chem>                   | 0.127        |
| <b>Top Features for negative contribution</b> |                   |                                                                                                                                       |              |
| <b>Fingerprint</b>                            | <b>Bit/Smiles</b> | <b>Feature Structure</b>                                                                                                              | <b>Score</b> |
| FCFP_6                                        | 991735244         | <br><chem>[*][C]1:[*]:[cH]:[cH]:[cH]:[cH]:1</chem> | -0.422       |
| FCFP_6                                        | 16                | <br><chem>[*]:[cH]:[*]</chem>                    | -0.354       |
| FCFP_6                                        | 590925877         | <br><chem>[*]N(C)(:[cH]:[*]):[cH]:[*]</chem>     | -0.323       |





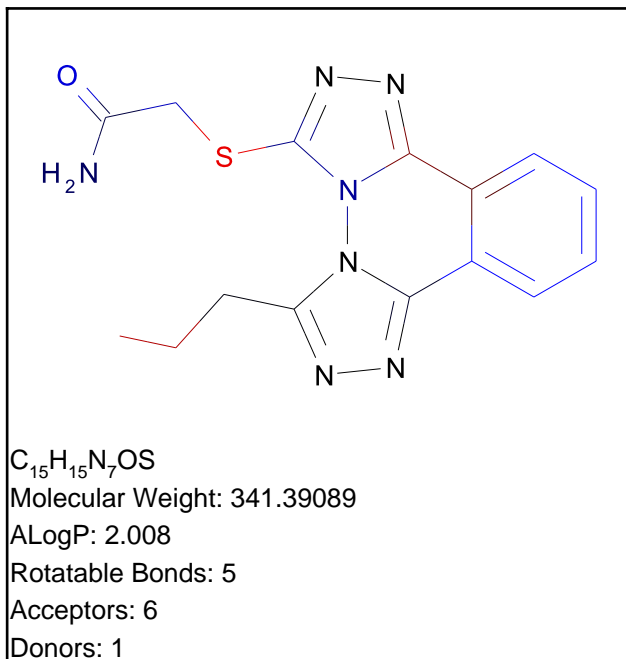

### Model Prediction

Prediction: 23.3

Unit: mg/kg\_body\_weight/day

Mahalanobis Distance: 14.5

Mahalanobis Distance p-value: 1.12e-009

Mahalanobis Distance: The Mahalanobis distance (MD) is a generalization of the Euclidean distance that accounts for correlations among the X properties. It is calculated as the distance to the center of the training data. The larger the MD, the less trustworthy the prediction.

Mahalanobis Distance p-value: The p-value gives the fraction of training data with an MD greater than or equal to the one for the given sample, assuming normally distributed data. The smaller the p-value, the less trustworthy the prediction. For highly non-normal X properties (e.g., fingerprints), the MD p-value is wildly inaccurate.

### Structural Similar Compounds

| Name                        | 4-(2-Hydroxyethylamino)-2-(5-nitro-2-thienyl)quinazoline | 4-Morpholino-2-(5-nitro-2-thienyl)quinazoline | 4-Bis(2-hydroxyethyl)amino-2-(5-nitro-2-thienyl)quinazoline |
|-----------------------------|----------------------------------------------------------|-----------------------------------------------|-------------------------------------------------------------|
| Structure                   |                                                          |                                               |                                                             |
| Actual Endpoint (-log C)    | 5.22831                                                  | 4.83293                                       | 5.05984                                                     |
| Predicted Endpoint (-log C) | 4.31976                                                  | 4.97658                                       | 4.23808                                                     |
| Distance                    | 0.662                                                    | 0.675                                         | 0.678                                                       |
| Reference                   | CPDB                                                     | CPDB                                          | CPDB                                                        |

### Model Applicability

Unknown features are fingerprint features in the query molecule, but not found or appearing too infrequently in the training set.

- All properties and OPS components are within expected ranges.

### Feature Contribution

#### Top features for positive contribution

| Fingerprint | Bit/Smiles | Feature Structure | Score |
|-------------|------------|-------------------|-------|
| FCFP_6      | 1          | <br>[*]=O         | 0.234 |

|                                               |                   |                                                                                                                                      |              |
|-----------------------------------------------|-------------------|--------------------------------------------------------------------------------------------------------------------------------------|--------------|
| FCFP_6                                        | -1272768868       | 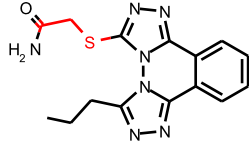<br>[*]SCC(=[*])[*]                               | 0.127        |
| FCFP_6                                        | 307419094         | <br>[*][c](:[*]):[c](:[cH<br>]:[*]):[c](:[*]):[*] | 0.121        |
| <b>Top Features for negative contribution</b> |                   |                                                                                                                                      |              |
| <b>Fingerprint</b>                            | <b>Bit/Smiles</b> | <b>Feature Structure</b>                                                                                                             | <b>Score</b> |
| FCFP_6                                        | 991735244         | <br>[*]:[c]1:[*]:[cH]:[cH<br>]:[cH]:[cH]:1        | -0.422       |
| FCFP_6                                        | 16                | <br>[*]:[cH]:[*]                                | -0.354       |
| FCFP_6                                        | 566058135         | <br>[*]CC(=O)N[*]                               | -0.182       |



# Doxorubicin

# TOPKAT\_Carcinogenic\_Potency\_TD50\_Rat

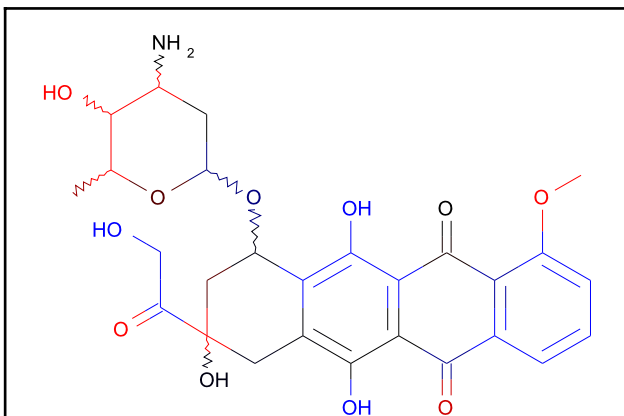

C<sub>27</sub>H<sub>29</sub>NO<sub>11</sub>

Molecular Weight: 543.51925

ALogP: -4.4e-002

Rotatable Bonds: 5

Acceptors: 12

Donors: 6

## Model Prediction

Prediction: 0.861

Unit: mg/kg\_body\_weight/day

Mahalanobis Distance: 17.4

Mahalanobis Distance p-value: 6.65e-019

Mahalanobis Distance: The Mahalanobis distance (MD) is a generalization of the Euclidean distance that accounts for correlations among the X properties. It is calculated as the distance to the center of the training data. The larger the MD, the less trustworthy the prediction.

Mahalanobis Distance p-value: The p-value gives the fraction of training data with an MD greater than or equal to the one for the given sample, assuming normally distributed data. The smaller the p-value, the less trustworthy the prediction. For highly non-normal X properties (e.g., fingerprints), the MD p-value is wildly inaccurate.

## Structural Similar Compounds

| Name                        | 424     | D & C red no. 5 | Salicylazosulfapyridine |
|-----------------------------|---------|-----------------|-------------------------|
| Structure                   |         |                 |                         |
| Actual Endpoint (-log C)    | 4.70022 | 3.04419         | 2.39891                 |
| Predicted Endpoint (-log C) | 5.67571 | 4.52866         | 3.17598                 |
| Distance                    | 1.039   | 1.056           | 1.057                   |
| Reference                   | CPDB    | CPDB            | CPDB                    |

## Model Applicability

Unknown features are fingerprint features in the query molecule, but not found or appearing too infrequently in the training set.

1. All properties and OPS components are within expected ranges.

## Feature Contribution

### Top features for positive contribution

| Fingerprint | Bit/Smiles  | Feature Structure                | Score |
|-------------|-------------|----------------------------------|-------|
| FCFP_6      | -1043250487 | <br><chem>[*]CC(C[*])N[*]</chem> | 1.15  |

|                                               |                   |                                                                                                                                  |              |
|-----------------------------------------------|-------------------|----------------------------------------------------------------------------------------------------------------------------------|--------------|
| FCFP_6                                        | 136627117         | 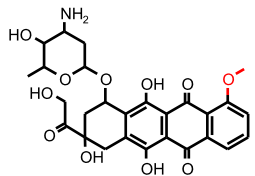<br>[*]OC                                     | 0.69         |
| FCFP_6                                        | 565968762         | <br>[*]CC(=O)C([*])([*])[*]                   | 0.266        |
| <b>Top Features for negative contribution</b> |                   |                                                                                                                                  |              |
| <b>Fingerprint</b>                            | <b>Bit/Smiles</b> | <b>Feature Structure</b>                                                                                                         | <b>Score</b> |
| FCFP_6                                        | -1272709286       | <br>[*]NCC                                    | -0.526       |
| FCFP_6                                        | 991735244         | <br>[*]:[c]1:[*]:[cH]:[cH]<br>]:[cH]:[cH]:1 | -0.422       |
| FCFP_6                                        | 7                 | <br>[*]O                                    | -0.372       |



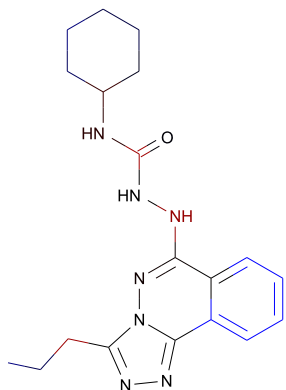

$C_{19}H_{25}N_7O$

Molecular Weight: 367.44809

ALogP: 3.681

Rotatable Bonds: 5

Acceptors: 5

Donors: 3

### Model Prediction

Prediction: 0.118

Unit: g/kg\_body\_weight

Mahalanobis Distance: Not Available

Mahalanobis Distance p-value: Not Available

Mahalanobis Distance: The Mahalanobis distance (MD) is a generalization of the Euclidean distance that accounts for correlations among the X properties. It is calculated as the distance to the center of the training data. The larger the MD, the less trustworthy the prediction.

Mahalanobis Distance p-value: The p-value gives the fraction of training data with an MD greater than or equal to the one for the given sample, assuming normally distributed data. The smaller the p-value, the less trustworthy the prediction. For highly non-normal X properties (e.g., fingerprints), the MD p-value is wildly inaccurate.

### Model Applicability

Unknown features are fingerprint features in the query molecule, but not found or appearing too infrequently in the training set.

1. OPS PC18 out of range. Value: -5.5208. Training min, max, SD, explained variance: -4.7991, 6.1674, 1.831, 0.0147.
2. OPS PC31 out of range. Value: 6.0969. Training min, max, SD, explained variance: -4.0208, 4.2529, 1.246, 0.0068.
3. Unknown FCFP\_2 feature: -332197802: [\*][c]1:[\*]:[\*]:[c](:[\*]):n:1:n:[\*]
4. Unknown FCFP\_2 feature: 1294344583: [\*]NN[c](:[\*]):[\*]
- 5.
- 6.
- 7.
8. Unknown ECFP\_6 feature: 672362763: [\*]:n(:[\*]):[\*]
9. Unknown ECFP\_6 feature: 1997021792: [\*]:[cH]:[cH]:[cH]:[\*]
10. Unknown ECFP\_6 feature: 1333660716: [\*][c](:[\*]):[c](:[cH]:[\*]):[c](:[\*]):[\*]
11. Unknown ECFP\_6 feature: 1049768340: [\*]N[c](:n:[\*]):[c](:[\*]):[\*]
12. Unknown ECFP\_6 feature: 835630791: [\*][c](:[\*]):n:n(:[\*]):[\*]
13. Unknown ECFP\_6 feature: -1507082173: [\*][c]1:[\*]:[\*]:[c](:[\*]):n:1:n:[\*]
14. Unknown ECFP\_6 feature: 1049075205: [\*]:n1:[\*]:[\*]:n:[c]:1:[c](:[\*]):[\*]
15. Unknown ECFP\_6 feature: -1238415266: [\*]NN[c](:[\*]):[\*]
16. Unknown ECFP\_6 feature: -435188506: [\*]C[c]1:n:[\*]:[\*]:n:1:[\*]
17. Unknown ECFP\_6 feature: 911256832: [\*][c]1:[\*]:[\*]:n:n:1
18. Unknown ECFP\_6 feature: -1795525632: [\*]CC[c](:[\*]):[\*]
19. Unknown ECFP\_6 feature: -1793471910: [\*]CCC
20. Unknown ECFP\_6 feature: 1635339976: [\*]NNC(=[\*])[\*]
21. Unknown ECFP\_6 feature: -649580166: [\*]NC(=O)N[\*]
22. Unknown ECFP\_6 feature: -2091181441: [\*]C([\*])NC(=[\*])[\*]
23. Unknown ECFP\_6 feature: -859078569: [\*]CC(C[\*])N[\*]
24. Unknown ECFP\_6 feature: -1332781180: [\*]CCC[\*]

### Feature Contribution

#### Top features for positive contribution

| Fingerprint | Bit/Smiles | Feature Structure | Score |
|-------------|------------|-------------------|-------|
|             |            |                   |       |

|                                               |                   |                                                                                                                                  |              |
|-----------------------------------------------|-------------------|----------------------------------------------------------------------------------------------------------------------------------|--------------|
| ECFP_6                                        | -167460056        | 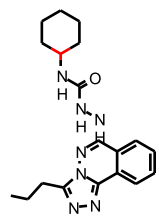<br>[*]C[*][*]                                 | 0.136        |
| ECFP_6                                        | 1559650422        | <br>[*]C[*]                                   | 0.129        |
| FCFP_6                                        | 3                 | <br>[*]N[*]                                   | 0.0924       |
| <b>Top Features for negative contribution</b> |                   |                                                                                                                                  |              |
| <b>Fingerprint</b>                            | <b>Bit/Smiles</b> | <b>Feature Structure</b>                                                                                                         | <b>Score</b> |
| FCFP_6                                        | 991735244         | <br>[*]:[c]1:[*]:[cH]:[cH]<br>]:[cH]:[cH]:1 | -0.134       |
| ECFP_6                                        | 1564392544        | <br>[*]:[c]1:[*]:[cH]:[cH]<br>]:[cH]:[cH]:1 | -0.133       |



|        |   |                                                                                                                                                                                                                                                                                                                                                                                                                                                                                                                                                                                                              |        |
|--------|---|--------------------------------------------------------------------------------------------------------------------------------------------------------------------------------------------------------------------------------------------------------------------------------------------------------------------------------------------------------------------------------------------------------------------------------------------------------------------------------------------------------------------------------------------------------------------------------------------------------------|--------|
| FCFP_6 | 1 | 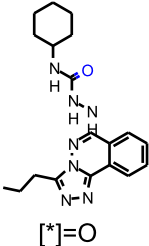 <p>The chemical structure shows a benzimidazole ring system. One nitrogen atom of the benzimidazole is substituted with a propyl group (-CH<sub>2</sub>-CH<sub>2</sub>-CH<sub>3</sub>). The other nitrogen atom is substituted with a cyclohexyl group (-C<sub>6</sub>H<sub>11</sub>). The 2-position of the benzimidazole ring is substituted with a carbonyl group (-C(=O)-). The oxygen atom of the carbonyl group is highlighted in blue. The entire structure is enclosed in a box with a label [*]=O below it.</p> | -0.102 |
|--------|---|--------------------------------------------------------------------------------------------------------------------------------------------------------------------------------------------------------------------------------------------------------------------------------------------------------------------------------------------------------------------------------------------------------------------------------------------------------------------------------------------------------------------------------------------------------------------------------------------------------------|--------|

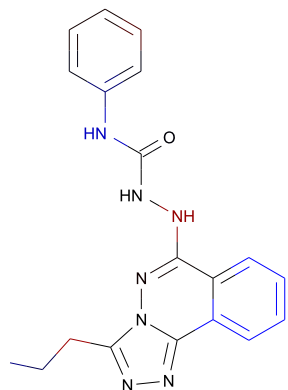

$C_{19}H_{19}N_7O$

Molecular Weight: 361.40046

ALogP: 3.399

Rotatable Bonds: 5

Acceptors: 5

Donors: 3

### Model Prediction

Prediction: 0.142

Unit: g/kg\_body\_weight

Mahalanobis Distance: Not Available

Mahalanobis Distance p-value: Not Available

Mahalanobis Distance: The Mahalanobis distance (MD) is a generalization of the Euclidean distance that accounts for correlations among the X properties. It is calculated as the distance to the center of the training data. The larger the MD, the less trustworthy the prediction.

Mahalanobis Distance p-value: The p-value gives the fraction of training data with an MD greater than or equal to the one for the given sample, assuming normally distributed data. The smaller the p-value, the less trustworthy the prediction. For highly non-normal X properties (e.g., fingerprints), the MD p-value is wildly inaccurate.

### Model Applicability

Unknown features are fingerprint features in the query molecule, but not found or appearing too infrequently in the training set.

1. OPS PC31 out of range. Value: 5.2395. Training min, max, SD, explained variance: -4.0208, 4.2529, 1.246, 0.0068.
2. Unknown FCFP\_2 feature: -332197802: [\*][c]1:[\*]:[\*]:[c](:[\*]):n:1:n:[\*]
3. Unknown FCFP\_2 feature: 1294344583: [\*]NN[c](:[\*]):[\*]
- 4.
- 5.
- 6.
- 7.
8. Unknown ECFP\_6 feature: 672362763: [\*]:n(:[\*]):[\*]
9. Unknown ECFP\_6 feature: 1997021792: [\*]:[cH]:[cH]:[cH]:[\*]
10. Unknown ECFP\_6 feature: 1333660716: [\*][c](:[\*]):[c](:[cH]:[\*]):[c](:[\*]):[\*]
11. Unknown ECFP\_6 feature: 1049768340: [\*]N[c](:n:[\*]):[c](:[\*]):[\*]
12. Unknown ECFP\_6 feature: 835630791: [\*][c](:[\*]):n:n(:[\*]):[\*]
13. Unknown ECFP\_6 feature: -1507082173: [\*][c]1:[\*]:[\*]:[c](:[\*]):n:1:n:[\*]
14. Unknown ECFP\_6 feature: 1049075205: [\*]:n1:[\*]:[\*]:n:[c]:1:[c](:[\*]):[\*]
15. Unknown ECFP\_6 feature: -1238415266: [\*]NN[c](:[\*]):[\*]
16. Unknown ECFP\_6 feature: -435188506: [\*]C[c]1:n:[\*]:[\*]:n:1:[\*]
17. Unknown ECFP\_6 feature: 911256832: [\*][c]1:[\*]:[\*]:n:n:1
18. Unknown ECFP\_6 feature: -1795525632: [\*]CC[c](:[\*]):[\*]
19. Unknown ECFP\_6 feature: -1793471910: [\*]CCC
20. Unknown ECFP\_6 feature: 1635339976: [\*]NNC(=[\*])[\*]
21. Unknown ECFP\_6 feature: -649580166: [\*]NC(=O)N[\*]
22. Unknown ECFP\_6 feature: -177077903: [\*]N[c](:[cH]:[\*]):[cH]:[\*]

### Feature Contribution

#### Top features for positive contribution

| Fingerprint | Bit/Smiles | Feature Structure | Score |
|-------------|------------|-------------------|-------|
| ECFP_6      | 1559650422 | <p>[*]C[*]</p>    | 0.129 |

|                                               |                   |                                                                                                                             |              |
|-----------------------------------------------|-------------------|-----------------------------------------------------------------------------------------------------------------------------|--------------|
| FCFP_6                                        | 3                 | 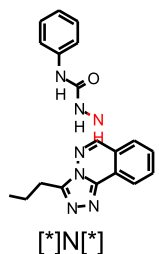<br>[*]N[*]                               | 0.0924       |
| FCFP_6                                        | -2093839777       | <br>[*][c]1:[cH]:[cH]:[cH]:[cH]:[cH]:1   | 0.078        |
| <b>Top Features for negative contribution</b> |                   |                                                                                                                             |              |
| <b>Fingerprint</b>                            | <b>Bit/Smiles</b> | <b>Feature Structure</b>                                                                                                    | <b>Score</b> |
| FCFP_6                                        | 991735244         | <br>[*]:[c]1:[*]:[cH]:[cH]:[cH]:[cH]:1   | -0.134       |
| ECFP_6                                        | 1564392544        | <br>[*]:[c]1:[*]:[cH]:[cH]:[cH]:[cH]:1 | -0.133       |
| FCFP_6                                        | 1                 | <br>[*]=O                              | -0.102       |



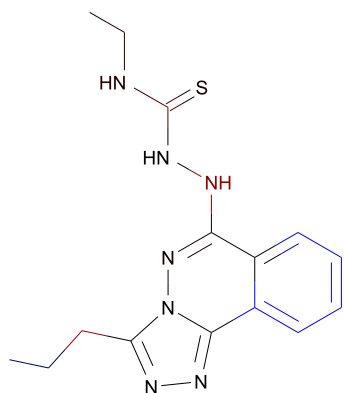

C<sub>15</sub>H<sub>19</sub>N<sub>7</sub>S

Molecular Weight: 329.42325

ALogP: 3.388

Rotatable Bonds: 7

Acceptors: 5

Donors: 3

### Model Prediction

Prediction: 0.0717

Unit: g/kg\_body\_weight

Mahalanobis Distance: Not Available

Mahalanobis Distance p-value: Not Available

Mahalanobis Distance: The Mahalanobis distance (MD) is a generalization of the Euclidean distance that accounts for correlations among the X properties. It is calculated as the distance to the center of the training data. The larger the MD, the less trustworthy the prediction.

Mahalanobis Distance p-value: The p-value gives the fraction of training data with an MD greater than or equal to the one for the given sample, assuming normally distributed data. The smaller the p-value, the less trustworthy the prediction. For highly non-normal X properties (e.g., fingerprints), the MD p-value is wildly inaccurate.

### Model Applicability

Unknown features are fingerprint features in the query molecule, but not found or appearing too infrequently in the training set.

1. OPS PC31 out of range. Value: 4.987. Training min, max, SD, explained variance: -4.0208, 4.2529, 1.246, 0.0068.
2. Unknown FCFP\_2 feature: -332197802: [\*][c]1:[\*]:[\*]:[c](:[\*]):n:1:n:[\*]
3. Unknown FCFP\_2 feature: 1294344583: [\*]NN[c](:[\*]):[\*]
- 4.
- 5.
- 6.
- 7.
8. Unknown ECFP\_6 feature: 672362763: [\*]:n(:[\*]):[\*]
9. Unknown ECFP\_6 feature: 1997021792: [\*]:[cH]:[cH]:[cH]:[\*]
10. Unknown ECFP\_6 feature: 1333660716: [\*][c](:[\*]):[c](:[cH]:[\*]):[c](:[\*]):[\*]
11. Unknown ECFP\_6 feature: 1049768340: [\*]N[c](:n:[\*]):[c](:[\*]):[\*]
12. Unknown ECFP\_6 feature: 835630791: [\*][c](:[\*]):n:n(:[\*]):[\*]
13. Unknown ECFP\_6 feature: -1507082173: [\*][c]1:[\*]:[\*]:[c](:[\*]):n:1:n:[\*]
14. Unknown ECFP\_6 feature: 1049075205: [\*]:n1:[\*]:[\*]:n:[c]:1:[c](:[\*]):[\*]
15. Unknown ECFP\_6 feature: -1238415266: [\*]NN[c](:[\*]):[\*]
16. Unknown ECFP\_6 feature: -435188506: [\*]C[c]1:n:[\*]:[\*]:n:1:[\*]
17. Unknown ECFP\_6 feature: 911256832: [\*][c]1:[\*]:[\*]:n:n:1
18. Unknown ECFP\_6 feature: -1795525632: [\*]CC[c](:[\*]):[\*]
19. Unknown ECFP\_6 feature: -1793471910: [\*]CCC
20. Unknown ECFP\_6 feature: 1635339976: [\*]NNC(=[\*])[\*]
21. Unknown ECFP\_6 feature: 150794520: [\*]NC(=S)N[\*]
22. Unknown ECFP\_6 feature: 1979182050: [\*]C(=S)[\*]
23. Unknown ECFP\_6 feature: 497523368: [\*]CNC(=[\*])[\*]
24. Unknown ECFP\_6 feature: -950223878: [\*]NCC

### Feature Contribution

#### Top features for positive contribution

| Fingerprint | Bit/Smiles | Feature Structure | Score |
|-------------|------------|-------------------|-------|
| ECFP_6      | 1559650422 | <p>[*]C[*]</p>    | 0.129 |

|                                               |                   |                                                                                                                                  |              |
|-----------------------------------------------|-------------------|----------------------------------------------------------------------------------------------------------------------------------|--------------|
| ECFP_6                                        | -845108448        | 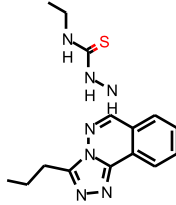<br>[*]=S                                     | 0.105        |
| FCFP_6                                        | 3                 | <br>[*]N[*]                                   | 0.0924       |
| <b>Top Features for negative contribution</b> |                   |                                                                                                                                  |              |
| <b>Fingerprint</b>                            | <b>Bit/Smiles</b> | <b>Feature Structure</b>                                                                                                         | <b>Score</b> |
| FCFP_6                                        | 991735244         | <br>[*]:[c]1:[*]:[cH]:[cH]<br>]:[cH]:[cH]:1   | -0.134       |
| ECFP_6                                        | 1564392544        | <br>[*]:[c]1:[*]:[cH]:[cH]<br>]:[cH]:[cH]:1 | -0.133       |
| FCFP_6                                        | 1                 | <br>[*]=O                                   | -0.102       |



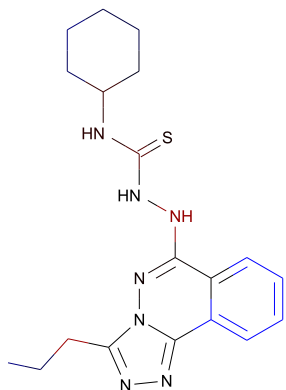

$C_{19}H_{25}N_7S$

Molecular Weight: 383.51369

ALogP: 4.898

Rotatable Bonds: 7

Acceptors: 5

Donors: 3

### Model Prediction

Prediction: 0.0838

Unit: g/kg\_body\_weight

Mahalanobis Distance: Not Available

Mahalanobis Distance p-value: Not Available

Mahalanobis Distance: The Mahalanobis distance (MD) is a generalization of the Euclidean distance that accounts for correlations among the X properties. It is calculated as the distance to the center of the training data. The larger the MD, the less trustworthy the prediction.

Mahalanobis Distance p-value: The p-value gives the fraction of training data with an MD greater than or equal to the one for the given sample, assuming normally distributed data. The smaller the p-value, the less trustworthy the prediction. For highly non-normal X properties (e.g., fingerprints), the MD p-value is wildly inaccurate.

### Model Applicability

Unknown features are fingerprint features in the query molecule, but not found or appearing too infrequently in the training set.

1. OPS PC20 out of range. Value: 6.397. Training min, max, SD, explained variance: -5.771, 6.0322, 1.721, 0.0130.
2. OPS PC31 out of range. Value: 5.4043. Training min, max, SD, explained variance: -4.0208, 4.2529, 1.246, 0.0068.
3. Unknown FCFP\_2 feature: -332197802: [\*][c]1:[\*]:[\*]:[c](:[\*]):n:1:n:[\*]
4. Unknown FCFP\_2 feature: 1294344583: [\*]NN[c](:[\*]):[\*]
- 5.
- 6.
- 7.
8. Unknown ECFP\_6 feature: 672362763: [\*]:n(:[\*]):[\*]
9. Unknown ECFP\_6 feature: 1997021792: [\*]:[cH]:[cH]:[cH]:[\*]
10. Unknown ECFP\_6 feature: 1333660716: [\*][c](:[\*]):[c](:[cH]:[\*]):[c](:[\*]):[\*]
11. Unknown ECFP\_6 feature: 1049768340: [\*]N[c](:n:[\*]):[c](:[\*]):[\*]
12. Unknown ECFP\_6 feature: 835630791: [\*][c](:[\*]):n:n(:[\*]):[\*]
13. Unknown ECFP\_6 feature: -1507082173: [\*][c]1:[\*]:[\*]:[c](:[\*]):n:1:n:[\*]
14. Unknown ECFP\_6 feature: 1049075205: [\*]:n1:[\*]:[\*]:n:[c]:1:[c](:[\*]):[\*]
15. Unknown ECFP\_6 feature: -1238415266: [\*]NN[c](:[\*]):[\*]
16. Unknown ECFP\_6 feature: -435188506: [\*]C[c]1:n:[\*]:[\*]:n:1:[\*]
17. Unknown ECFP\_6 feature: 911256832: [\*][c]1:[\*]:[\*]:n:n:1
18. Unknown ECFP\_6 feature: -1795525632: [\*]CC[c](:[\*]):[\*]
19. Unknown ECFP\_6 feature: -1793471910: [\*]CCC
20. Unknown ECFP\_6 feature: 1635339976: [\*]NNC(=[\*])[\*]
21. Unknown ECFP\_6 feature: 150794520: [\*]NC(=S)N[\*]
22. Unknown ECFP\_6 feature: 1979182050: [\*]C(=S)[\*]
23. Unknown ECFP\_6 feature: -2091181441: [\*]C(\*)NC(=[\*])[\*]
24. Unknown ECFP\_6 feature: -859078569: [\*]CC(C[\*])N[\*]
25. Unknown ECFP\_6 feature: -1332781180: [\*]CCC[\*]

### Feature Contribution

#### Top features for positive contribution

| Fingerprint | Bit/Smiles | Feature Structure | Score |
|-------------|------------|-------------------|-------|
|             |            |                   |       |



|                                               |                   |                                                                                                                                  |              |
|-----------------------------------------------|-------------------|----------------------------------------------------------------------------------------------------------------------------------|--------------|
| ECFP_6                                        | -167460056        | 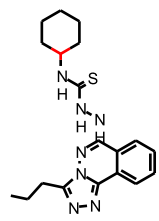<br>[*]C[*][*]                                 | 0.136        |
| ECFP_6                                        | 1559650422        | <br>[*]C[*]                                   | 0.129        |
| ECFP_6                                        | -845108448        | <br>[*]=S                                     | 0.105        |
| <b>Top Features for negative contribution</b> |                   |                                                                                                                                  |              |
| <b>Fingerprint</b>                            | <b>Bit/Smiles</b> | <b>Feature Structure</b>                                                                                                         | <b>Score</b> |
| FCFP_6                                        | 991735244         | <br>[*]:[c]1:[*]:[cH]:[cH]<br>]:[cH]:[cH]:1 | -0.134       |
| ECFP_6                                        | 1564392544        | <br>[*]:[c]1:[*]:[cH]:[cH]<br>]:[cH]:[cH]:1 | -0.133       |

|        |   |                                                                                                                                    |        |
|--------|---|------------------------------------------------------------------------------------------------------------------------------------|--------|
| FCFP_6 | 1 | 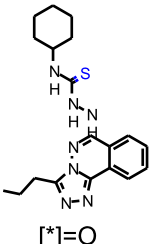 <chem>CCCC1=NC2=NC=CC=C2N1C(=O)N3CCCCC3</chem> | -0.102 |
|--------|---|------------------------------------------------------------------------------------------------------------------------------------|--------|

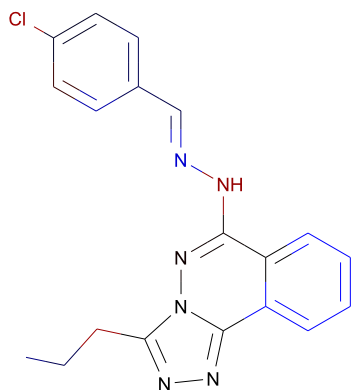

$C_{19}H_{17}ClN_6$

Molecular Weight: 364.83147

ALogP: 4.967

Rotatable Bonds: 5

Acceptors: 5

Donors: 1

### Model Prediction

Prediction: 0.059

Unit: g/kg\_body\_weight

Mahalanobis Distance: Not Available

Mahalanobis Distance p-value: Not Available

Mahalanobis Distance: The Mahalanobis distance (MD) is a generalization of the Euclidean distance that accounts for correlations among the X properties. It is calculated as the distance to the center of the training data. The larger the MD, the less trustworthy the prediction.

Mahalanobis Distance p-value: The p-value gives the fraction of training data with an MD greater than or equal to the one for the given sample, assuming normally distributed data. The smaller the p-value, the less trustworthy the prediction. For highly non-normal X properties (e.g., fingerprints), the MD p-value is wildly inaccurate.

### Model Applicability

Unknown features are fingerprint features in the query molecule, but not found or appearing too infrequently in the training set.

- All properties and OPS components are within expected ranges.
- Unknown FCFP\_2 feature: -332197802: [\*][c]1:[\*]:[\*]:[c](:[\*]):n:1:n:[\*]
- Unknown FCFP\_2 feature: 1294285001: [\*]=NN[c](:[\*]):[\*]
- 
- 
- 
- 
- 
- Unknown ECFP\_6 feature: 672362763: [\*]:n(:[\*]):[\*]
- Unknown ECFP\_6 feature: 1997021792: [\*]:[cH]:[cH]:[cH]:[\*]
- Unknown ECFP\_6 feature: 1333660716: [\*][c](:[\*]):[c](:[cH]:[\*]):[c](:[\*]):[\*]
- Unknown ECFP\_6 feature: 1049768340: [\*]N[c](:n:[\*]):[c](:[\*]):[\*]
- Unknown ECFP\_6 feature: 835630791: [\*][c](:[\*]):n(:[\*]):[\*]
- Unknown ECFP\_6 feature: -1507082173: [\*][c]1:[\*]:[\*]:[c](:[\*]):n:1:n:[\*]
- Unknown ECFP\_6 feature: 1049075205: [\*]:n1:[\*]:[\*]:n:[c]:1:[c](:[\*]):[\*]
- Unknown ECFP\_6 feature: -435188506: [\*]C[c]1:n:[\*]:[\*]:n:1:[\*]
- Unknown ECFP\_6 feature: 911256832: [\*][c]1:[\*]:[\*]:n:n:1
- Unknown ECFP\_6 feature: -1795525632: [\*]CC[c](:[\*]):[\*]
- Unknown ECFP\_6 feature: -1793471910: [\*]CCC
- Unknown ECFP\_6 feature: -1236714312: [\*]=NN[c](:[\*]):[\*]
- Unknown ECFP\_6 feature: 1814278164: [\*]N\N=C\[\*]
- Unknown ECFP\_6 feature: -1832102709: [\*]N=C[c](:[\*]):[\*]
- Unknown ECFP\_6 feature: -176483725: [\*]=C[c](:[cH]:[\*]):[cH]:[\*]
- Unknown ECFP\_6 feature: -176494269: [\*]:[cH]:[c](Cl):[cH]:[\*]
- Unknown ECFP\_6 feature: 99947387: [\*]:[c](:[\*])Cl

### Feature Contribution

#### Top features for positive contribution

| Fingerprint | Bit/Smiles | Feature Structure | Score |
|-------------|------------|-------------------|-------|
| ECFP_6      | 1559650422 | <p>[*]C[*]</p>    | 0.129 |

|                                               |                   |                                                                                                                                  |              |
|-----------------------------------------------|-------------------|----------------------------------------------------------------------------------------------------------------------------------|--------------|
| FCFP_6                                        | 32                | 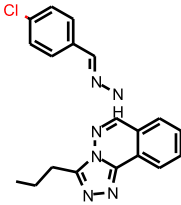<br>[*]Cl                                     | 0.101        |
| FCFP_6                                        | 3                 | <br>[*]N[*]                                   | 0.0924       |
| <b>Top Features for negative contribution</b> |                   |                                                                                                                                  |              |
| <b>Fingerprint</b>                            | <b>Bit/Smiles</b> | <b>Feature Structure</b>                                                                                                         | <b>Score</b> |
| FCFP_6                                        | 991735244         | <br>[*]:[c]1:[*]:[cH]:[cH]<br>]:[cH]:[cH]:1   | -0.134       |
| ECFP_6                                        | 1564392544        | <br>[*]:[c]1:[*]:[cH]:[cH]<br>]:[cH]:[cH]:1 | -0.133       |
| FCFP_6                                        | 1                 | <br>[*]=O                                   | -0.102       |



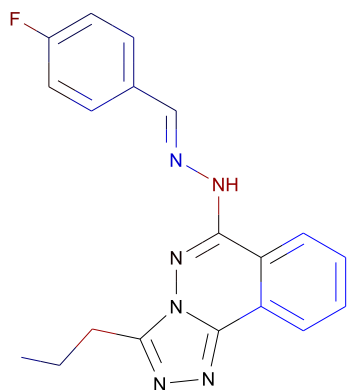

$C_{19}H_{17}FN_6$

Molecular Weight: 348.37688

ALogP: 4.508

Rotatable Bonds: 5

Acceptors: 5

Donors: 1

### Model Prediction

Prediction: 0.0634

Unit: g/kg\_body\_weight

Mahalanobis Distance: Not Available

Mahalanobis Distance p-value: Not Available

Mahalanobis Distance: The Mahalanobis distance (MD) is a generalization of the Euclidean distance that accounts for correlations among the X properties. It is calculated as the distance to the center of the training data. The larger the MD, the less trustworthy the prediction.

Mahalanobis Distance p-value: The p-value gives the fraction of training data with an MD greater than or equal to the one for the given sample, assuming normally distributed data. The smaller the p-value, the less trustworthy the prediction. For highly non-normal X properties (e.g., fingerprints), the MD p-value is wildly inaccurate.

### Model Applicability

Unknown features are fingerprint features in the query molecule, but not found or appearing too infrequently in the training set.

- All properties and OPS components are within expected ranges.
- Unknown FCFP\_2 feature: -332197802: [\*][c]1:[\*]:[\*]:[c](:[\*]):n:1:n:[\*]
- Unknown FCFP\_2 feature: 1294285001: [\*]=NN[c](:[\*]):[\*]
- 
- 
- 
- 
- Unknown ECFP\_6 feature: 672362763: [\*]:n(:[\*]):[\*]
- Unknown ECFP\_6 feature: -1046436026: [\*]F
- Unknown ECFP\_6 feature: 1997021792: [\*]:[cH]:[cH]:[cH]:[\*]
- Unknown ECFP\_6 feature: 1333660716: [\*][c](:[\*]):[c](:[cH]:[\*]):[c](:[\*]):[\*]
- Unknown ECFP\_6 feature: 1049768340: [\*]N[c](:n:[\*]):[c](:[\*]):[\*]
- Unknown ECFP\_6 feature: 835630791: [\*][c](:[\*]):n:n(:[\*]):[\*]
- Unknown ECFP\_6 feature: -1507082173: [\*][c]1:[\*]:[\*]:[c](:[\*]):n:1:n:[\*]
- Unknown ECFP\_6 feature: 1049075205: [\*]:n1:[\*]:[\*]:n:[c]:1:[c](:[\*]):[\*]
- Unknown ECFP\_6 feature: -435188506: [\*]C[c]1:n:[\*]:[\*]:n:1:[\*]
- Unknown ECFP\_6 feature: 911256832: [\*][c]1:[\*]:[\*]:n:n:1
- Unknown ECFP\_6 feature: -1795525632: [\*]CC[c](:[\*]):[\*]
- Unknown ECFP\_6 feature: -1793471910: [\*]CCC
- Unknown ECFP\_6 feature: -1236714312: [\*]=NN[c](:[\*]):[\*]
- Unknown ECFP\_6 feature: 1814278164: [\*]N\N=C\[\*]
- Unknown ECFP\_6 feature: -1832102709: [\*]N=C[c](:[\*]):[\*]
- Unknown ECFP\_6 feature: -176483725: [\*]=C[c](:[cH]:[\*]):[cH]:[\*]
- Unknown ECFP\_6 feature: -176686665: [\*]:[cH]:[c](F):[cH]:[\*]
- Unknown ECFP\_6 feature: 220735655: [\*]:[c](:[\*])F

### Feature Contribution

#### Top features for positive contribution

| Fingerprint | Bit/Smiles | Feature Structure | Score |
|-------------|------------|-------------------|-------|
| ECFP_6      | 1559650422 | <p>[*]C[*]</p>    | 0.129 |

|                                               |                   |                                                                                                                                  |              |
|-----------------------------------------------|-------------------|----------------------------------------------------------------------------------------------------------------------------------|--------------|
| FCFP_6                                        | 32                | 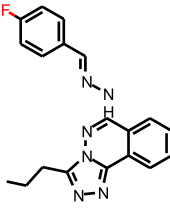<br>[*]Cl                                     | 0.101        |
| FCFP_6                                        | 3                 | <br>[*]N[*]                                   | 0.0924       |
| <b>Top Features for negative contribution</b> |                   |                                                                                                                                  |              |
| <b>Fingerprint</b>                            | <b>Bit/Smiles</b> | <b>Feature Structure</b>                                                                                                         | <b>Score</b> |
| FCFP_6                                        | 991735244         | <br>[*]:[c]1:[*]:[cH]:[cH]<br>]:[cH]:[cH]:1   | -0.134       |
| ECFP_6                                        | 1564392544        | <br>[*]:[c]1:[*]:[cH]:[cH]<br>]:[cH]:[cH]:1 | -0.133       |
| FCFP_6                                        | 1                 | <br>[*]=O                                   | -0.102       |





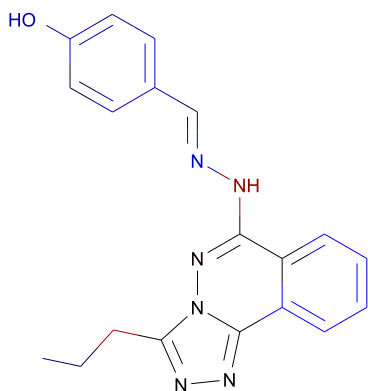

C<sub>19</sub>H<sub>18</sub>N<sub>6</sub>O

Molecular Weight: 346.38582

ALogP: 4.061

Rotatable Bonds: 5

Acceptors: 6

Donors: 2

### Model Prediction

Prediction: 0.148

Unit: g/kg\_body\_weight

Mahalanobis Distance: Not Available

Mahalanobis Distance p-value: Not Available

Mahalanobis Distance: The Mahalanobis distance (MD) is a generalization of the Euclidean distance that accounts for correlations among the X properties. It is calculated as the distance to the center of the training data. The larger the MD, the less trustworthy the prediction.

Mahalanobis Distance p-value: The p-value gives the fraction of training data with an MD greater than or equal to the one for the given sample, assuming normally distributed data. The smaller the p-value, the less trustworthy the prediction. For highly non-normal X properties (e.g., fingerprints), the MD p-value is wildly inaccurate.

### Model Applicability

Unknown features are fingerprint features in the query molecule, but not found or appearing too infrequently in the training set.

1. OPS PC31 out of range. Value: 4.9251. Training min, max, SD, explained variance: -4.0208, 4.2529, 1.246, 0.0068.
2. Unknown FCFP\_2 feature: -332197802: [\*][c]1:[\*]:[\*]:[c](:[\*]):n:1:n:[\*]
3. Unknown FCFP\_2 feature: 1294285001: [\*]=NN[c](:[\*]):[\*]
- 4.
- 5.
- 6.
- 7.
8. Unknown ECFP\_6 feature: 672362763: [\*]:n(:[\*]):[\*]
9. Unknown ECFP\_6 feature: 1997021792: [\*]:[cH]:[cH]:[cH]:[\*]
10. Unknown ECFP\_6 feature: 1333660716: [\*][c](:[\*]):[c](:[cH]:[\*]):[c](:[\*]):[\*]
11. Unknown ECFP\_6 feature: 1049768340: [\*]N[c](:n:[\*]):[c](:[\*]):[\*]
12. Unknown ECFP\_6 feature: 835630791: [\*][c](:[\*]):n:n(:[\*]):[\*]
13. Unknown ECFP\_6 feature: -1507082173: [\*][c]1:[\*]:[\*]:[c](:[\*]):n:1:n:[\*]
14. Unknown ECFP\_6 feature: 1049075205: [\*]:n1:[\*]:[\*]:n:[c]:1:[c](:[\*]):[\*]
15. Unknown ECFP\_6 feature: -435188506: [\*]C[c]1:n:[\*]:[\*]:n:1:[\*]
16. Unknown ECFP\_6 feature: 911256832: [\*][c]1:[\*]:[\*]:n:n:1
17. Unknown ECFP\_6 feature: -1795525632: [\*]CC[c](:[\*]):[\*]
18. Unknown ECFP\_6 feature: -1793471910: [\*]CCC
19. Unknown ECFP\_6 feature: -1236714312: [\*]=NN[c](:[\*]):[\*]
20. Unknown ECFP\_6 feature: 1814278164: [\*]N\N=C\[\*]
21. Unknown ECFP\_6 feature: -1832102709: [\*]N=C[c](:[\*]):[\*]
22. Unknown ECFP\_6 feature: -176483725: [\*]=C[c](:[cH]:[\*]):[cH]:[\*]
23. Unknown ECFP\_6 feature: -177786161: [\*]:[cH]:[c](O):[cH]:[\*]
24. Unknown ECFP\_6 feature: 2019062761: [\*]:[c](:[\*])O

### Feature Contribution

#### Top features for positive contribution

| Fingerprint | Bit/Smiles | Feature Structure | Score |
|-------------|------------|-------------------|-------|
| ECFP_6      | 1559650422 | <p>[*]C[*]</p>    | 0.129 |

|                                               |                   |                                                                                                                                  |              |
|-----------------------------------------------|-------------------|----------------------------------------------------------------------------------------------------------------------------------|--------------|
| FCFP_6                                        | 3                 | 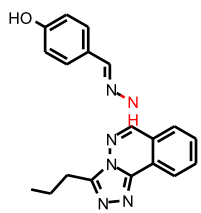<br>[*]N[*]                                    | 0.0924       |
| ECFP_6                                        | -1925046727       | <br>[*]C=[*]                                  | 0.0915       |
| <b>Top Features for negative contribution</b> |                   |                                                                                                                                  |              |
| <b>Fingerprint</b>                            | <b>Bit/Smiles</b> | <b>Feature Structure</b>                                                                                                         | <b>Score</b> |
| FCFP_6                                        | 991735244         | <br>[*]:[c]1:[*]:[cH]:[cH]<br>]:[cH]:[cH]:1   | -0.134       |
| ECFP_6                                        | 1564392544        | <br>[*]:[c]1:[*]:[cH]:[cH]<br>]:[cH]:[cH]:1 | -0.133       |
| FCFP_6                                        | 1                 | <br>[*]=O                                   | -0.102       |



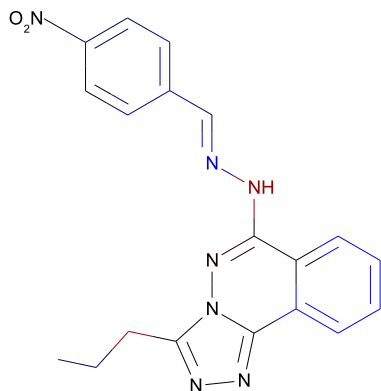

$C_{19}H_{17}N_7O_2$

Molecular Weight: 375.38397

ALogP: 4.197

Rotatable Bonds: 6

Acceptors: 7

Donors: 1

## Model Prediction

Prediction: 0.13

Unit: g/kg\_body\_weight

Mahalanobis Distance: Not Available

Mahalanobis Distance p-value: Not Available

Mahalanobis Distance: The Mahalanobis distance (MD) is a generalization of the Euclidean distance that accounts for correlations among the X properties. It is calculated as the distance to the center of the training data. The larger the MD, the less trustworthy the prediction.

Mahalanobis Distance p-value: The p-value gives the fraction of training data with an MD greater than or equal to the one for the given sample, assuming normally distributed data. The smaller the p-value, the less trustworthy the prediction. For highly non-normal X properties (e.g., fingerprints), the MD p-value is wildly inaccurate.

## Model Applicability

Unknown features are fingerprint features in the query molecule, but not found or appearing too infrequently in the training set.

- All properties and OPS components are within expected ranges.
- Unknown FCFP\_2 feature: 5: [\*][O-]
- Unknown FCFP\_2 feature: -332197802: [\*][c]1:[\*]:[\*]:[c](:[\*]):n:1:n:[\*]
- Unknown FCFP\_2 feature: 1294285001: [\*]=NN[c](:[\*]):[\*]
- Unknown FCFP\_2 feature: -828984032: [\*][N+](=[\*])[c](:[cH]:[\*]):[cH]:[\*]
- Unknown FCFP\_2 feature: -1338588315: [\*]:[c](:[\*])[N+](=O)[O-]
- Unknown FCFP\_2 feature: 1872392852: [\*][N+](=O)[\*]
- Unknown FCFP\_2 feature: 260476081: [\*][N+](=[\*])[O-]
- Unknown ECFP\_6 feature: 672362763: [\*]:n(:[\*]):[\*]
- Unknown ECFP\_6 feature: 1043790491: [\*][N+](=[\*])[\*]
- Unknown ECFP\_6 feature: 781519895: [\*][O-]
- Unknown ECFP\_6 feature: 1997021792: [\*]:[cH]:[cH]:[cH]:[\*]
- Unknown ECFP\_6 feature: 1333660716: [\*][c](:[\*]):[c](:[cH]:[\*]):[c](:[\*]):[\*]
- Unknown ECFP\_6 feature: 1049768340: [\*]N[c](:n:[\*]):[c](:[\*]):[\*]
- Unknown ECFP\_6 feature: 835630791: [\*][c](:[\*]):n:n(:[\*]):[\*]
- Unknown ECFP\_6 feature: -1507082173: [\*][c]1:[\*]:[\*]:[c](:[\*]):n:1:n:[\*]
- Unknown ECFP\_6 feature: 1049075205: [\*]:n1:[\*]:[\*]:n:[c]:1:[c](:[\*]):[\*]
- Unknown ECFP\_6 feature: -435188506: [\*]C[c]1:n:[\*]:[\*]:n:1:[\*]
- Unknown ECFP\_6 feature: 911256832: [\*][c]1:[\*]:[\*]:n:n:1
- Unknown ECFP\_6 feature: -1795525632: [\*]CC[c](:[\*]):[\*]
- Unknown ECFP\_6 feature: -1793471910: [\*]CCC
- Unknown ECFP\_6 feature: -1236714312: [\*]=NN[c](:[\*]):[\*]
- Unknown ECFP\_6 feature: 1814278164: [\*]N\N=C\[\*]
- Unknown ECFP\_6 feature: -1832102709: [\*]N=C[c](:[\*]):[\*]
- Unknown ECFP\_6 feature: -176483725: [\*]=C[c](:[cH]:[\*]):[cH]:[\*]
- Unknown ECFP\_6 feature: -179073144: [\*][N+](=[\*])[c](:[cH]:[\*]):[cH]:[\*]
- Unknown ECFP\_6 feature: -215026467: [\*]:[c](:[\*])[N+](=O)[O-]
- Unknown ECFP\_6 feature: 2104376220: [\*][N+](=O)[\*]
- Unknown ECFP\_6 feature: -659271057: [\*][N+](=[\*])[O-]

## Feature Contribution

### Top features for positive contribution

| Fingerprint | Bit/Smiles | Feature Structure | Score |
|-------------|------------|-------------------|-------|
|-------------|------------|-------------------|-------|

|                                               |                   |                                                                                                                                  |              |
|-----------------------------------------------|-------------------|----------------------------------------------------------------------------------------------------------------------------------|--------------|
| ECFP_6                                        | 1559650422        | 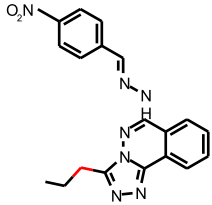<br>[*]C[*]                                   | 0.129        |
| FCFP_6                                        | 3                 | <br>[*]N[*]                                   | 0.0924       |
| ECFP_6                                        | -1925046727       | <br>[*]C=[*]                                  | 0.0915       |
| <b>Top Features for negative contribution</b> |                   |                                                                                                                                  |              |
| <b>Fingerprint</b>                            | <b>Bit/Smiles</b> | <b>Feature Structure</b>                                                                                                         | <b>Score</b> |
| FCFP_6                                        | 991735244         | <br>[*]:[c]1:[*]:[cH]:[cH]<br>]:[cH]:[cH]:1 | -0.134       |
| ECFP_6                                        | 1564392544        | <br>[*]:[c]1:[*]:[cH]:[cH]<br>]:[cH]:[cH]:1 | -0.133       |

|        |   |                                                                                                                                                                                                                                                                                                                                                                                                                                                                                                                                               |        |
|--------|---|-----------------------------------------------------------------------------------------------------------------------------------------------------------------------------------------------------------------------------------------------------------------------------------------------------------------------------------------------------------------------------------------------------------------------------------------------------------------------------------------------------------------------------------------------|--------|
| FCFP_6 | 1 | 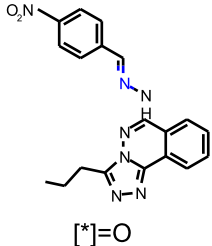 <p>The chemical structure shows a benzotriazole ring system. A propyl group is attached to one of the nitrogen atoms of the triazole ring. The other nitrogen atom of the triazole ring is connected to a benzene ring. This benzene ring is further substituted with a p-nitrophenylhydrazone group, where the nitrogen of the hydrazone is highlighted in blue. The nitro group is at the para position relative to the hydrazone attachment point.</p> | -0.102 |
|--------|---|-----------------------------------------------------------------------------------------------------------------------------------------------------------------------------------------------------------------------------------------------------------------------------------------------------------------------------------------------------------------------------------------------------------------------------------------------------------------------------------------------------------------------------------------------|--------|

[\*]=O

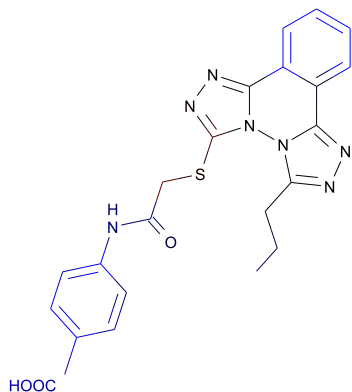

$C_{22}H_{19}N_7O_3S$

Molecular Weight: 461.49635

ALogP: 3.42

Rotatable Bonds: 7

Acceptors: 8

Donors: 2

### Model Prediction

Prediction: 0.212

Unit: g/kg\_body\_weight

Mahalanobis Distance: Not Available

Mahalanobis Distance p-value: Not Available

Mahalanobis Distance: The Mahalanobis distance (MD) is a generalization of the Euclidean distance that accounts for correlations among the X properties. It is calculated as the distance to the center of the training data. The larger the MD, the less trustworthy the prediction.

Mahalanobis Distance p-value: The p-value gives the fraction of training data with an MD greater than or equal to the one for the given sample, assuming normally distributed data. The smaller the p-value, the less trustworthy the prediction. For highly non-normal X properties (e.g., fingerprints), the MD p-value is wildly inaccurate.

### Model Applicability

Unknown features are fingerprint features in the query molecule, but not found or appearing too infrequently in the training set.

- All properties and OPS components are within expected ranges.
- Unknown FCFP\_2 feature: -332197802: [\*][c]1:[\*]:[\*]:[c](:[\*]):n:1:n:[\*]
- 
- 
- 
- 
- 
- Unknown ECFP\_6 feature: -830332112: [\*]S[\*]
- Unknown ECFP\_6 feature: 672362763: [\*]:n(:[\*]):[\*]
- Unknown ECFP\_6 feature: 1731843802: [\*]CC(=O)N[\*]
- Unknown ECFP\_6 feature: -955816473: [\*]SCC(=[\*])[\*]
- Unknown ECFP\_6 feature: 1427820655: [\*]CS[c](:[\*]):[\*]
- Unknown ECFP\_6 feature: 1986731747: [\*]S[c]1:n:[\*]:[\*]:n:1:[\*]
- Unknown ECFP\_6 feature: 911256832: [\*][c]1:[\*]:[\*]:n:n:1
- Unknown ECFP\_6 feature: -1793471910: [\*]CCC
- Unknown ECFP\_6 feature: -1795525632: [\*]CC[c](:[\*]):[\*]
- Unknown ECFP\_6 feature: -435188506: [\*]C[c]1:n:[\*]:[\*]:n:1:[\*]
- Unknown ECFP\_6 feature: 1049075205: [\*]:n1:[\*]:[\*]:n:[c]1:[c](:[\*]):[\*]
- Unknown ECFP\_6 feature: 78665610: [\*][c]1:[\*]:[\*]:[c](:[\*]):n:1:n(:[\*]):[\*]
- Unknown ECFP\_6 feature: 1333660716: [\*][c](:[\*]):[c](:[cH]:[\*]):[c](:[\*]):[\*]
- Unknown ECFP\_6 feature: 1997021792: [\*]:[cH]:[cH]:[cH]:[\*]
- Unknown ECFP\_6 feature: -177077903: [\*]N[c](:[cH]:[\*]):[cH]:[\*]
- Unknown ECFP\_6 feature: -175146122: [\*]C(=[\*])[c](:[cH]:[\*]):[cH]:[\*]
- Unknown ECFP\_6 feature: 1429461619: [\*]:[c](:[\*])C(=O)O

### Feature Contribution

#### Top features for positive contribution

| Fingerprint | Bit/Smiles | Feature Structure | Score |
|-------------|------------|-------------------|-------|
| ECFP_6      | 1559650422 |                   | 0.129 |

|                                               |                   |                                                                                                                                               |              |
|-----------------------------------------------|-------------------|-----------------------------------------------------------------------------------------------------------------------------------------------|--------------|
| FCFP_6                                        | 3                 | 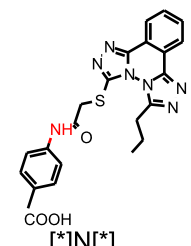<br><chem>[*]N[*]</chem>                                    | 0.0924       |
| ECFP_6                                        | 2099970318        | <br><chem>[*]C(=O)[*]</chem>                               | 0.0766       |
| <b>Top Features for negative contribution</b> |                   |                                                                                                                                               |              |
| <b>Fingerprint</b>                            | <b>Bit/Smiles</b> | <b>Feature Structure</b>                                                                                                                      | <b>Score</b> |
| FCFP_6                                        | 991735244         | <br><chem>[*]:[c]1c(*)[cH]:[cH]<br/>[:[cH]:[cH]:1</chem>   | -0.134       |
| ECFP_6                                        | 1564392544        | <br><chem>[*]:[c]1c(*)[cH]:[cH]<br/>[:[cH]:[cH]:1</chem> | -0.133       |
| FCFP_6                                        | 1                 | <br><chem>[*]=O</chem>                                   | -0.102       |





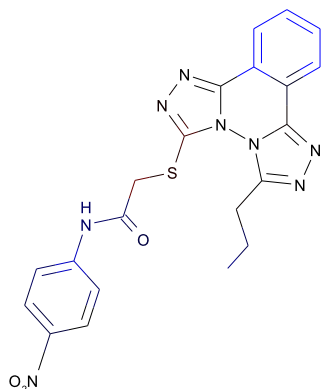

$C_{21}H_{18}N_8O_3S$

Molecular Weight: 462.48441

ALogP: 3.685

Rotatable Bonds: 7

Acceptors: 8

Donors: 1

### Model Prediction

Prediction: 0.0948

Unit: g/kg\_body\_weight

Mahalanobis Distance: Not Available

Mahalanobis Distance p-value: Not Available

Mahalanobis Distance: The Mahalanobis distance (MD) is a generalization of the Euclidean distance that accounts for correlations among the X properties. It is calculated as the distance to the center of the training data. The larger the MD, the less trustworthy the prediction.

Mahalanobis Distance p-value: The p-value gives the fraction of training data with an MD greater than or equal to the one for the given sample, assuming normally distributed data. The smaller the p-value, the less trustworthy the prediction. For highly non-normal X properties (e.g., fingerprints), the MD p-value is wildly inaccurate.

### Model Applicability

Unknown features are fingerprint features in the query molecule, but not found or appearing too infrequently in the training set.

- All properties and OPS components are within expected ranges.
- Unknown FCFP\_2 feature: 5: [\*][O-]
- Unknown FCFP\_2 feature: -332197802: [\*][c]1:[\*]:[\*]:[c](:[\*]):n:1:n:[\*]
- Unknown FCFP\_2 feature: -828984032: [\*][N+](=[\*])[c](:[cH]:[\*]):[cH]:[\*]
- Unknown FCFP\_2 feature: -1338588315: [\*]:[c](:[\*])[N+](=O)[O-]
- Unknown FCFP\_2 feature: 1872392852: [\*][N+](=O)[\*]
- Unknown FCFP\_2 feature: 260476081: [\*][N+](=[\*])[O-]
- Unknown ECFP\_6 feature: -830332112: [\*]S[\*]
- Unknown ECFP\_6 feature: 672362763: [\*]:n(:[\*]):[\*]
- Unknown ECFP\_6 feature: 1043790491: [\*][N+](=[\*])[\*]
- Unknown ECFP\_6 feature: 781519895: [\*][O-]
- Unknown ECFP\_6 feature: 1731843802: [\*]CC(=O)N[\*]
- Unknown ECFP\_6 feature: -955816473: [\*]SCC(=[\*])[\*]
- Unknown ECFP\_6 feature: 1427820655: [\*]CS[c](:[\*]):[\*]
- Unknown ECFP\_6 feature: 1986731747: [\*]S[c]1:n:[\*]:[\*]:n:1:[\*]
- Unknown ECFP\_6 feature: 911256832: [\*][c]1:[\*]:[\*]:n:n:1
- Unknown ECFP\_6 feature: -1793471910: [\*]CCC
- Unknown ECFP\_6 feature: -1795525632: [\*]CC[c](:[\*]):[\*]
- Unknown ECFP\_6 feature: -435188506: [\*]C[c]1:n:[\*]:[\*]:n:1:[\*]
- Unknown ECFP\_6 feature: 1049075205: [\*]:n1:[\*]:[\*]:n:[c]:1:[c](:[\*]):[\*]
- Unknown ECFP\_6 feature: 78665610: [\*][c]1:[\*]:[\*]:[c](:[\*]):n:1:n(:[\*]):[\*]
- Unknown ECFP\_6 feature: 1333660716: [\*][c](:[\*]):[c](:[cH]:[\*]):[c](:[\*]):[\*]
- Unknown ECFP\_6 feature: 1997021792: [\*]:[cH]:[cH]:[cH]:[\*]
- Unknown ECFP\_6 feature: -177077903: [\*]N[c](:[cH]:[\*]):[cH]:[\*]
- Unknown ECFP\_6 feature: -179073144: [\*][N+](=[\*])[c](:[cH]:[\*]):[cH]:[\*]
- Unknown ECFP\_6 feature: -215026467: [\*]:[c](:[\*])[N+](=O)[O-]
- Unknown ECFP\_6 feature: 2104376220: [\*][N+](=O)[\*]
- Unknown ECFP\_6 feature: -659271057: [\*][N+](=[\*])[O-]

### Feature Contribution

#### Top features for positive contribution

| Fingerprint | Bit/Smiles | Feature Structure | Score |
|-------------|------------|-------------------|-------|
|-------------|------------|-------------------|-------|

|        |            |                                                                                                    |        |
|--------|------------|----------------------------------------------------------------------------------------------------|--------|
| ECFP_6 | 1559650422 | 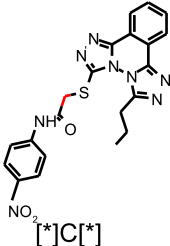<br>[*]C[*]     | 0.129  |
| FCFP_6 | 3          | <br>[*]N[*]     | 0.0924 |
| ECFP_6 | 2099970318 | <br>[*]C(=O)[*] | 0.0766 |

**Top Features for negative contribution**

| Fingerprint | Bit/Smiles | Feature Structure                                                                                                               | Score  |
|-------------|------------|---------------------------------------------------------------------------------------------------------------------------------|--------|
| FCFP_6      | 991735244  | 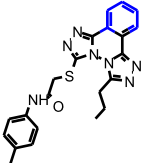<br>[*]:[c]↑[*]:[cH]:[cH]<br>]:[cH]:[cH]:1 | -0.134 |
| ECFP_6      | 1564392544 | <br>[*]:[c]↑[*]:[cH]:[cH]<br>]:[cH]:[cH]:1 | -0.133 |

|        |   |                                                                                              |        |
|--------|---|----------------------------------------------------------------------------------------------|--------|
| FCFP_6 | 1 | 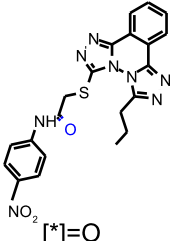<br>[*]=O | -0.102 |
|--------|---|----------------------------------------------------------------------------------------------|--------|

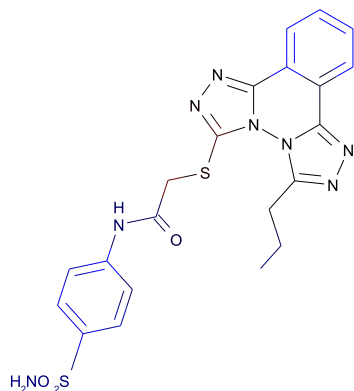

$C_{21}H_{20}N_8O_3S_2$

Molecular Weight: 496.56529

ALogP: 2.496

Rotatable Bonds: 7

Acceptors: 8

Donors: 2

### Model Prediction

Prediction: 0.17

Unit: g/kg\_body\_weight

Mahalanobis Distance: Not Available

Mahalanobis Distance p-value: Not Available

Mahalanobis Distance: The Mahalanobis distance (MD) is a generalization of the Euclidean distance that accounts for correlations among the X properties. It is calculated as the distance to the center of the training data. The larger the MD, the less trustworthy the prediction.

Mahalanobis Distance p-value: The p-value gives the fraction of training data with an MD greater than or equal to the one for the given sample, assuming normally distributed data. The smaller the p-value, the less trustworthy the prediction. For highly non-normal X properties (e.g., fingerprints), the MD p-value is wildly inaccurate.

### Model Applicability

Unknown features are fingerprint features in the query molecule, but not found or appearing too infrequently in the training set.

1. All properties and OPS components are within expected ranges.
2. Unknown FCFP\_2 feature: -332197802: [\*][c]1:[\*]:[\*]:[c](:[\*]):n:1:n:[\*]
- 3.
- 4.
- 5.
- 6.
- 7.
8. Unknown ECFP\_6 feature: -830332112: [\*]S[\*]
9. Unknown ECFP\_6 feature: 672362763: [\*]:n(:[\*]):[\*]
10. Unknown ECFP\_6 feature: -797085356: [\*]S(=[\*])(=[\*])[\*]
11. Unknown ECFP\_6 feature: 1731843802: [\*]CC(=O)N[\*]
12. Unknown ECFP\_6 feature: -955816473: [\*]SCC(=[\*])[\*]
13. Unknown ECFP\_6 feature: 1427820655: [\*]CS[c](:[\*]):[\*]
14. Unknown ECFP\_6 feature: 1986731747: [\*]S[c]1:n:[\*]:[\*]:n:1:[\*]
15. Unknown ECFP\_6 feature: 911256832: [\*][c]1:[\*]:[\*]:n:n:1
16. Unknown ECFP\_6 feature: -1793471910: [\*]CCC
17. Unknown ECFP\_6 feature: -1795525632: [\*]CC[c](:[\*]):[\*]
18. Unknown ECFP\_6 feature: -435188506: [\*]C[c]1:n:[\*]:[\*]:n:1:[\*]
19. Unknown ECFP\_6 feature: 1049075205: [\*]:n1:[\*]:[\*]:n:[c]1:[c](:[\*]):[\*]
20. Unknown ECFP\_6 feature: 78665610: [\*][c]1:[\*]:[\*]:[c](:[\*]):n:1:n(:[\*]):[\*]
21. Unknown ECFP\_6 feature: 1333660716: [\*][c](:[\*]):[c](:[cH]:[\*]):[c](:[\*]):[\*]
22. Unknown ECFP\_6 feature: 1997021792: [\*]:[cH]:[cH]:[cH]:[\*]
23. Unknown ECFP\_6 feature: -177077903: [\*]N[c](:[cH]:[\*]):[cH]:[\*]
24. Unknown ECFP\_6 feature: -177264675: [\*]S(=[\*])(=[\*])[c](:[cH]:[\*]):[cH]:[\*]
25. Unknown ECFP\_6 feature: -2121766239: [\*]:[c](:[\*])S(=O)(=O)N
26. Unknown ECFP\_6 feature: 2102150379: [\*]S(=[\*])(=O)[\*]
27. Unknown ECFP\_6 feature: -934226723: [\*]S(=[\*])(=[\*])N

### Feature Contribution

#### Top features for positive contribution

| Fingerprint | Bit/Smiles | Feature Structure | Score |
|-------------|------------|-------------------|-------|
|             |            |                   |       |

|                                               |                   |                                       |              |
|-----------------------------------------------|-------------------|---------------------------------------|--------------|
| ECFP_6                                        | 1559650422        |                                       | 0.129        |
| FCFP_6                                        | 3                 |                                       | 0.0924       |
| ECFP_6                                        | 2099970318        |                                       | 0.0766       |
| <b>Top Features for negative contribution</b> |                   |                                       |              |
| <b>Fingerprint</b>                            | <b>Bit/Smiles</b> | <b>Feature Structure</b>              | <b>Score</b> |
| FCFP_6                                        | 991735244         | <br>[*]C[*]:[*]:[cH]:[cH]:[cH]:[cH]:1 | -0.134       |
| ECFP_6                                        | 1564392544        | <br>[*]C[*]:[*]:[cH]:[cH]:[cH]:[cH]:1 | -0.133       |

|        |   |                                                                                                                                                                                                                                                                                                                                                                                                                                                                                                                            |        |
|--------|---|----------------------------------------------------------------------------------------------------------------------------------------------------------------------------------------------------------------------------------------------------------------------------------------------------------------------------------------------------------------------------------------------------------------------------------------------------------------------------------------------------------------------------|--------|
| FCFP_6 | 1 | 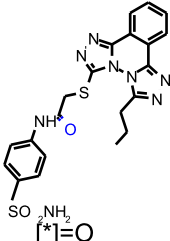 <p>The chemical structure shows a central benzothiazine bicyclic system. A benzene ring is fused to the thiazine ring. A propyl group is attached to the thiazine ring. A sulfonamide group (-SO<sub>2</sub>NH<sub>2</sub>) is attached to a piperazine ring, which is further connected to the thiazine system. The sulfonamide group is highlighted with a blue asterisk and a box, indicating it is the target of the reaction.</p> | -0.102 |
|--------|---|----------------------------------------------------------------------------------------------------------------------------------------------------------------------------------------------------------------------------------------------------------------------------------------------------------------------------------------------------------------------------------------------------------------------------------------------------------------------------------------------------------------------------|--------|

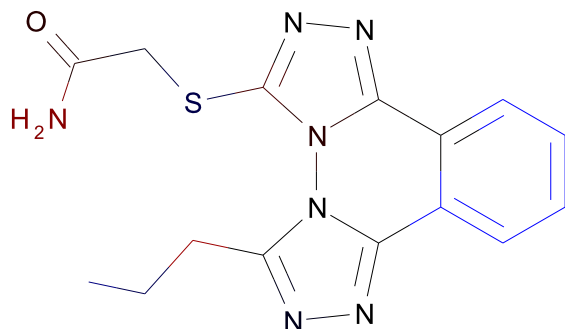

C<sub>15</sub>H<sub>15</sub>N<sub>7</sub>OS

Molecular Weight: 341.39089

ALogP: 2.008

Rotatable Bonds: 5

Acceptors: 6

Donors: 1

### Model Prediction

Prediction: 0.0849

Unit: g/kg\_body\_weight

Mahalanobis Distance: Not Available

Mahalanobis Distance p-value: Not Available

Mahalanobis Distance: The Mahalanobis distance (MD) is a generalization of the Euclidean distance that accounts for correlations among the X properties. It is calculated as the distance to the center of the training data. The larger the MD, the less trustworthy the prediction.

Mahalanobis Distance p-value: The p-value gives the fraction of training data with an MD greater than or equal to the one for the given sample, assuming normally distributed data. The smaller the p-value, the less trustworthy the prediction. For highly non-normal X properties (e.g., fingerprints), the MD p-value is wildly inaccurate.

### Model Applicability

Unknown features are fingerprint features in the query molecule, but not found or appearing too infrequently in the training set.

1. All properties and OPS components are within expected ranges.
2. Unknown FCFP\_2 feature: -332197802: [\*][c]1:[\*]:[\*]:[c](:[\*]):n:1:n:[\*]
- 3.
- 4.
- 5.
- 6.
- 7.
8. Unknown ECFP\_6 feature: 672362763: [\*]:n(:[\*]):[\*]
9. Unknown ECFP\_6 feature: -830332112: [\*]S[\*]
10. Unknown ECFP\_6 feature: 1997021792: [\*]:[cH]:[cH]:[cH]:[\*]
11. Unknown ECFP\_6 feature: 1333660716: [\*][c](:[\*]):[c](:[cH]:[\*]):[c](:[\*]):[\*]
12. Unknown ECFP\_6 feature: 1049075205: [\*]:n1:[\*]:[\*]:n:[c]:1:[c](:[\*]):[\*]
13. Unknown ECFP\_6 feature: 78665610: [\*][c]1:[\*]:[\*]:[c](:[\*]):n:1:n(:[\*]):[\*]
14. Unknown ECFP\_6 feature: -435188506: [\*]C[c]1:n:[\*]:[\*]:n:1:[\*]
15. Unknown ECFP\_6 feature: 911256832: [\*][c]1:[\*]:[\*]:n:n:1
16. Unknown ECFP\_6 feature: -1795525632: [\*]CC[c](:[\*]):[\*]
17. Unknown ECFP\_6 feature: -1793471910: [\*]CCC
18. Unknown ECFP\_6 feature: 1986731747: [\*]S[c]1:n:[\*]:[\*]:n:1:[\*]
19. Unknown ECFP\_6 feature: 1427820655: [\*]CS[c](:[\*]):[\*]
20. Unknown ECFP\_6 feature: -955816473: [\*]SCC(=[\*])[\*]
21. Unknown ECFP\_6 feature: -1708545601: [\*]CC(=O)N
22. Unknown ECFP\_6 feature: -932108170: [\*]C(=[\*])N

### Feature Contribution

#### Top features for positive contribution

| Fingerprint | Bit/Smiles | Feature Structure | Score |
|-------------|------------|-------------------|-------|
| ECFP_6      | 1559650422 | <p>[*]C[*]</p>    | 0.129 |



|                                               |                   |                                                                                                                                  |              |
|-----------------------------------------------|-------------------|----------------------------------------------------------------------------------------------------------------------------------|--------------|
| FCFP_6                                        | 3                 | 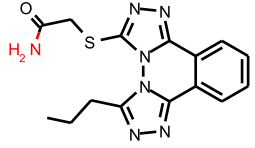<br>[*]N[*]                                   | 0.0924       |
| ECFP_6                                        | 2099970318        | <br>[*]C(=O)[*]                               | 0.0766       |
| <b>Top Features for negative contribution</b> |                   |                                                                                                                                  |              |
| <b>Fingerprint</b>                            | <b>Bit/Smiles</b> | <b>Feature Structure</b>                                                                                                         | <b>Score</b> |
| FCFP_6                                        | 991735244         | <br>[*]:[c]1:[*]:[cH]:[cH]<br>]:[cH]:[cH]:1   | -0.134       |
| ECFP_6                                        | 1564392544        | <br>[*]:[c]1:[*]:[cH]:[cH]<br>]:[cH]:[cH]:1 | -0.133       |
| FCFP_6                                        | 1                 | <br>[*]=O                                   | -0.102       |



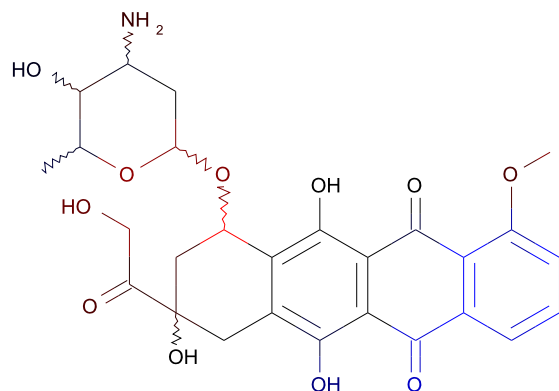

$C_{27}H_{29}NO_{11}$

Molecular Weight: 543.51925

ALogP: -4.4e-002

Rotatable Bonds: 5

Acceptors: 12

Donors: 6

## Model Prediction

Prediction: 0.013

Unit: g/kg\_body\_weight

Mahalanobis Distance: Not Available

Mahalanobis Distance p-value: Not Available

Mahalanobis Distance: The Mahalanobis distance (MD) is a generalization of the Euclidean distance that accounts for correlations among the X properties. It is calculated as the distance to the center of the training data. The larger the MD, the less trustworthy the prediction.

Mahalanobis Distance p-value: The p-value gives the fraction of training data with an MD greater than or equal to the one for the given sample, assuming normally distributed data. The smaller the p-value, the less trustworthy the prediction. For highly non-normal X properties (e.g., fingerprints), the MD p-value is wildly inaccurate.

## Model Applicability

Unknown features are fingerprint features in the query molecule, but not found or appearing too infrequently in the training set.

1. All properties and OPS components are within expected ranges.
- 2.
- 3.
- 4.
- 5.
- 6.
- 7.
8. Unknown ECFP\_6 feature: 1997021792: [\*]:[cH]:[cH]:[cH]:[\*]
9. Unknown ECFP\_6 feature: -813997308: [\*]C(=[\*])[c](:[c]([\*]):[\*]):[c]([\*]):[\*]
10. Unknown ECFP\_6 feature: 1717462980: [\*]:[c](:[\*])C(=O)[c](:[\*]):[\*]
11. Unknown ECFP\_6 feature: -1660913849: [\*][c](:[\*]):[c](O):[c]([\*]):[\*]
12. Unknown ECFP\_6 feature: -1659009760: [\*]C([\*])[c](:[c]([\*]):[\*]):[c]([\*]):[\*]
13. Unknown ECFP\_6 feature: -1660340418: [\*]C[c](:[c]([\*]):[\*]):[c]([\*]):[\*]
14. Unknown ECFP\_6 feature: 1123660302: [\*]CC(O[\*])[c](:[\*]):[\*]
15. Unknown ECFP\_6 feature: 413587124: [\*]C([\*])CC([\*])([\*])[\*]
16. Unknown ECFP\_6 feature: 140080459: [\*]CC(O)(C[\*])C(=[\*])[\*]
17. Unknown ECFP\_6 feature: 407900312: [\*]C([\*])([\*])C[c](:[\*]):[\*]
18. Unknown ECFP\_6 feature: 1307307440: [\*]:[c](:[\*])OC
19. Unknown ECFP\_6 feature: 2019062761: [\*]:[c](:[\*])O
20. Unknown ECFP\_6 feature: 456242574: [\*]C([\*])OC([\*])[\*]
21. Unknown ECFP\_6 feature: -1783281539: [\*]CC(=O)C([\*])([\*])[\*]
22. Unknown ECFP\_6 feature: -1907393688: [\*]C(=[\*])CO
23. Unknown ECFP\_6 feature: 2022454958: [\*]CO
24. Unknown ECFP\_6 feature: 2018700401: [\*]C([\*])([\*])O
25. Unknown ECFP\_6 feature: 1535429263: [\*]OC(C)C([\*])[\*]
26. Unknown ECFP\_6 feature: 305695353: [\*]C([\*])C(O)C([\*])[\*]
27. Unknown ECFP\_6 feature: 1201786014: [\*]CC(N)C([\*])[\*]
28. Unknown ECFP\_6 feature: -801490360: [\*]C([\*])CC([\*])[\*]
29. Unknown ECFP\_6 feature: -1409796893: [\*]C([\*])OC([\*])[\*]
30. Unknown ECFP\_6 feature: -932844120: [\*]C([\*])N
31. Unknown ECFP\_6 feature: 865482986: [\*]C([\*])C
32. Unknown ECFP\_6 feature: 2024749573: [\*]C([\*])O
33. Unknown ECFP\_6 feature: -2061744983: [\*]CC(O[\*])O[\*]

## Feature Contribution

### Top features for positive contribution

| Fingerprint | Bit/Smiles | Feature Structure | Score |
|-------------|------------|-------------------|-------|
|             |            |                   |       |

|                                               |                   |                                                                                                                                                |              |
|-----------------------------------------------|-------------------|------------------------------------------------------------------------------------------------------------------------------------------------|--------------|
| ECFP_6                                        | -167460056        | 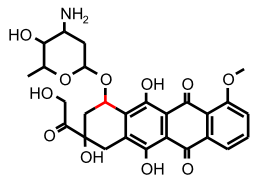<br><chem>[*]C([*])[*]</chem>                               | 0.136        |
| FCFP_6                                        | -1143715940       | <br><chem>[*]C([*])OC([*])[*]</chem>                        | 0.13         |
| ECFP_6                                        | 1559650422        | <br><chem>[*]C[*]</chem>                                    | 0.129        |
| <b>Top Features for negative contribution</b> |                   |                                                                                                                                                |              |
| <b>Fingerprint</b>                            | <b>Bit/Smiles</b> | <b>Feature Structure</b>                                                                                                                       | <b>Score</b> |
| FCFP_6                                        | 991735244         | <br><chem>[*]:[c]1:[*]:[cH]:[cH]<br/>]:[cH]:[cH]:1</chem> | -0.134       |
| ECFP_6                                        | 2106656448        | <br><chem>[*]C(=O)[*]</chem>                              | -0.11        |

|        |   |                                                                                                                                |        |
|--------|---|--------------------------------------------------------------------------------------------------------------------------------|--------|
| FCFP_6 | 1 | 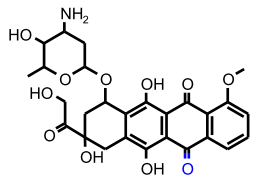 <p data-bbox="1470 316 1543 344">[*]=O</p> | -0.102 |
|--------|---|--------------------------------------------------------------------------------------------------------------------------------|--------|

7a

TOPKAT\_Rat\_Maximum\_Tolerated\_Dose\_Feed

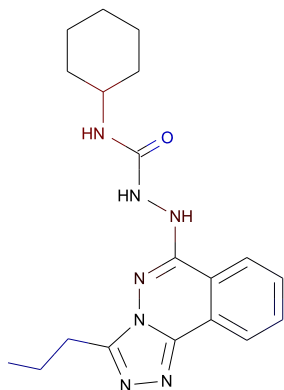C<sub>19</sub>H<sub>25</sub>N<sub>7</sub>O

Molecular Weight: 367.44809

ALogP: 3.681

Rotatable Bonds: 5

Acceptors: 5

Donors: 3

### Model Prediction

Prediction: 0.222

Unit: g/kg\_body\_weight

Mahalanobis Distance: 8.93

Mahalanobis Distance p-value: 0.00177

Mahalanobis Distance: The Mahalanobis distance (MD) is a generalization of the Euclidean distance that accounts for correlations among the X properties. It is calculated as the distance to the center of the training data. The larger the MD, the less trustworthy the prediction.

Mahalanobis Distance p-value: The p-value gives the fraction of training data with an MD greater than or equal to the one for the given sample, assuming normally distributed data. The smaller the p-value, the less trustworthy the prediction. For highly non-normal X properties (e.g., fingerprints), the MD p-value is wildly inaccurate.

### Structural Similar Compounds

| Name                        | PHENOLPHTHALEIN | DISPERSE YELLOW 3 | C.I.PIGMENT RED 3 |
|-----------------------------|-----------------|-------------------|-------------------|
| Structure                   |                 |                   |                   |
| Actual Endpoint (-log C)    | 2.20184         | 2.77703           | 2.65635           |
| Predicted Endpoint (-log C) | 2.8857          | 2.80195           | 2.97957           |
| Distance                    | 0.695           | 0.739             | 0.754             |
| Reference                   | NCI/NTP TR-465  | NCI/NTP TR-222    | NCI/NTP TR-407    |

### Model Applicability

Unknown features are fingerprint features in the query molecule, but not found or appearing too infrequently in the training set.

1. All properties and OPS components are within expected ranges.
2. Unknown FCFP\_2 feature: -332197802: [\*][c]1:[\*]:[\*]:[c]([\*]):n:1:n:[\*]
3. Unknown FCFP\_2 feature: -885461129: [\*]NNC(=[\*])[\*]

### Feature Contribution

#### Top features for positive contribution

| Fingerprint | Bit/Smiles | Feature Structure                     | Score |
|-------------|------------|---------------------------------------|-------|
| FCFP_2      | -885550502 | <br><chem>[*]C([*])NC(=[*])[*]</chem> | 0.115 |

|                                               |                   |                                                                                                     |              |
|-----------------------------------------------|-------------------|-----------------------------------------------------------------------------------------------------|--------------|
| FCFP_2                                        | 3                 | 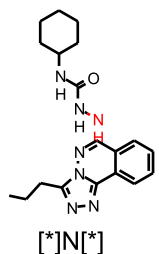<br>[*]N[*]       | 0.0737       |
| FCFP_2                                        | 17                | <br>[*]:n:[*]    | 0.0441       |
| <b>Top Features for negative contribution</b> |                   |                                                                                                     |              |
| <b>Fingerprint</b>                            | <b>Bit/Smiles</b> | <b>Feature Structure</b>                                                                            | <b>Score</b> |
| FCFP_2                                        | -1272798659       | <br>[*]CCC       | -0.111       |
| FCFP_2                                        | 1872154524        | <br>[*]C(=O)[*] | -0.105       |
| FCFP_2                                        | 1                 | <br>[*]=O      | -0.0796      |





7b

TOPKAT\_Rat\_Maximum\_Tolerated\_Dose\_Feed

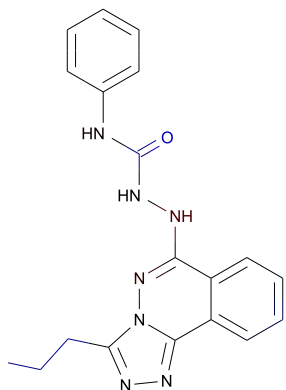C<sub>19</sub>H<sub>19</sub>N<sub>7</sub>O

Molecular Weight: 361.40046

ALogP: 3.399

Rotatable Bonds: 5

Acceptors: 5

Donors: 3

**Model Prediction**

Prediction: 0.369

Unit: g/kg\_body\_weight

Mahalanobis Distance: 10.5

Mahalanobis Distance p-value: 5.88e-006

Mahalanobis Distance: The Mahalanobis distance (MD) is a generalization of the Euclidean distance that accounts for correlations among the X properties. It is calculated as the distance to the center of the training data. The larger the MD, the less trustworthy the prediction.

Mahalanobis Distance p-value: The p-value gives the fraction of training data with an MD greater than or equal to the one for the given sample, assuming normally distributed data. The smaller the p-value, the less trustworthy the prediction. For highly non-normal X properties (e.g., fingerprints), the MD p-value is wildly inaccurate.

**Structural Similar Compounds**

| Name                        | PHENOLPHTHALEIN | C.I.PIGMENT RED 3 | SALICYLAZOSULFAPYRIDINE |
|-----------------------------|-----------------|-------------------|-------------------------|
| Structure                   |                 |                   |                         |
| Actual Endpoint (-log C)    | 2.20184         | 2.65635           | 3.375                   |
| Predicted Endpoint (-log C) | 2.8857          | 2.97957           | 2.80292                 |
| Distance                    | 0.765           | 0.818             | 0.837                   |
| Reference                   | NCI/NTP TR-465  | NCI/NTP TR-407    | NCI/NTP TR-457          |

**Model Applicability**

Unknown features are fingerprint features in the query molecule, but not found or appearing too infrequently in the training set.

1. All properties and OPS components are within expected ranges.
2. Unknown FCFP\_2 feature: -332197802: [\*][c]1:[\*]:[\*]:[c](:[\*]):n:1:n:[\*]
3. Unknown FCFP\_2 feature: -885461129: [\*]NNC(=[\*])[\*]

**Feature Contribution****Top features for positive contribution**

| Fingerprint | Bit/Smiles | Feature Structure | Score  |
|-------------|------------|-------------------|--------|
| FCFP_2      | 3          |                   | 0.0737 |

|                                               |                   |                                                                                                                        |              |
|-----------------------------------------------|-------------------|------------------------------------------------------------------------------------------------------------------------|--------------|
| FCFP_2                                        | 17                | 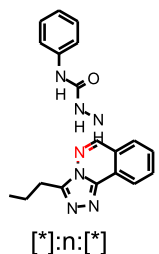<br>[*]:n:[*]                        | 0.0441       |
| FCFP_2                                        | 590925877         | <br>[*]N[c](:[cH]:[*]):[c<br>H]:[*] | 0.00762      |
| <b>Top Features for negative contribution</b> |                   |                                                                                                                        |              |
| <b>Fingerprint</b>                            | <b>Bit/Smiles</b> | <b>Feature Structure</b>                                                                                               | <b>Score</b> |
| FCFP_2                                        | -1272798659       | <br>[*]CCC                          | -0.111       |
| FCFP_2                                        | 1872154524        | <br>[*]C(=O)[*]                    | -0.105       |
| FCFP_2                                        | 1                 | <br>[*]=O                         | -0.0796      |



8a

TOPKAT\_Rat\_Maximum\_Tolerated\_Dose\_Feed

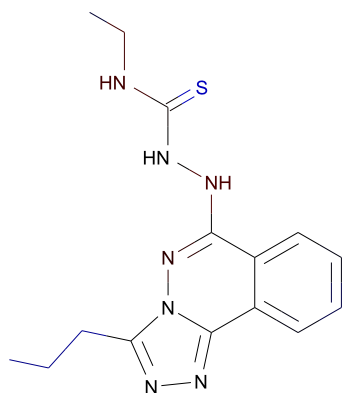C<sub>15</sub>H<sub>19</sub>N<sub>7</sub>S

Molecular Weight: 329.42325

ALogP: 3.388

Rotatable Bonds: 7

Acceptors: 5

Donors: 3

### Model Prediction

Prediction: 0.366

Unit: g/kg\_body\_weight

Mahalanobis Distance: 8.77

Mahalanobis Distance p-value: 0.00286

Mahalanobis Distance: The Mahalanobis distance (MD) is a generalization of the Euclidean distance that accounts for correlations among the X properties. It is calculated as the distance to the center of the training data. The larger the MD, the less trustworthy the prediction.

Mahalanobis Distance p-value: The p-value gives the fraction of training data with an MD greater than or equal to the one for the given sample, assuming normally distributed data. The smaller the p-value, the less trustworthy the prediction. For highly non-normal X properties (e.g., fingerprints), the MD p-value is wildly inaccurate.

### Structural Similar Compounds

| Name                        | SALICYLAZOSULFAPYRIDINE | FUROSEMIDE     | TOLBUTAMIDE    |
|-----------------------------|-------------------------|----------------|----------------|
| Structure                   |                         |                |                |
| Actual Endpoint (-log C)    | 3.375                   | 4.04236        | 2.3985         |
| Predicted Endpoint (-log C) | 2.80292                 | 2.8614         | 3.32272        |
| Distance                    | 0.737                   | 0.751          | 0.795          |
| Reference                   | NCI/NTP TR-457          | NCI/NTP TR-356 | NCI/NTP TR-031 |

### Model Applicability

Unknown features are fingerprint features in the query molecule, but not found or appearing too infrequently in the training set.

1. OPS PC12 out of range. Value: -2.4923. Training min, max, SD, explained variance: -2.364, 2.9228, 1.079, 0.0263.
2. Unknown FCFP\_2 feature: -332197802: [\*][c]1:[\*]:[\*]:[c](:[\*]):n:1:n:[\*]
3. Unknown FCFP\_2 feature: -885461129: [\*]NNC(=[\*])[\*]

### Feature Contribution

#### Top features for positive contribution

| Fingerprint | Bit/Smiles | Feature Structure      | Score |
|-------------|------------|------------------------|-------|
| FCFP_2      | -885550502 | <br>[*]C[*]NC(=[*])[*] | 0.115 |

|                                               |                   |                                                                                                     |              |
|-----------------------------------------------|-------------------|-----------------------------------------------------------------------------------------------------|--------------|
| FCFP_2                                        | 3                 | 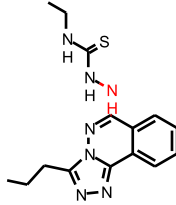<br>[*]N[*]      | 0.0737       |
| FCFP_2                                        | 17                | <br>[*]:n:[*]    | 0.0441       |
| <b>Top Features for negative contribution</b> |                   |                                                                                                     |              |
| <b>Fingerprint</b>                            | <b>Bit/Smiles</b> | <b>Feature Structure</b>                                                                            | <b>Score</b> |
| FCFP_2                                        | -1272798659       | <br>[*]CCC       | -0.111       |
| FCFP_2                                        | 1872154524        | <br>[*]C(=O)[*] | -0.105       |
| FCFP_2                                        | 1                 | <br>[*]=O      | -0.0796      |



8b

TOPKAT\_Rat\_Maximum\_Tolerated\_Dose\_Feed

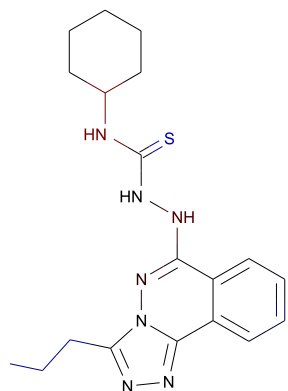C<sub>19</sub>H<sub>25</sub>N<sub>7</sub>S

Molecular Weight: 383.51369

ALogP: 4.898

Rotatable Bonds: 7

Acceptors: 5

Donors: 3

### Model Prediction

Prediction: 0.26

Unit: g/kg\_body\_weight

Mahalanobis Distance: 8.89

Mahalanobis Distance p-value: 0.00199

Mahalanobis Distance: The Mahalanobis distance (MD) is a generalization of the Euclidean distance that accounts for correlations among the X properties. It is calculated as the distance to the center of the training data. The larger the MD, the less trustworthy the prediction.

Mahalanobis Distance p-value: The p-value gives the fraction of training data with an MD greater than or equal to the one for the given sample, assuming normally distributed data. The smaller the p-value, the less trustworthy the prediction. For highly non-normal X properties (e.g., fingerprints), the MD p-value is wildly inaccurate.

### Structural Similar Compounds

| Name                        | SALICYLAZOSULFAPYRIDINE | C.I.PIGMENT RED 3 | ACETOHEXAMIDE  |
|-----------------------------|-------------------------|-------------------|----------------|
| Structure                   |                         |                   |                |
| Actual Endpoint (-log C)    | 3.375                   | 2.65635           | 2.55683        |
| Predicted Endpoint (-log C) | 2.80292                 | 2.97957           | 3.62413        |
| Distance                    | 0.742                   | 0.802             | 0.822          |
| Reference                   | NCI/NTP TR-457          | NCI/NTP TR-407    | NCI/NTP TR-050 |

### Model Applicability

Unknown features are fingerprint features in the query molecule, but not found or appearing too infrequently in the training set.

1. All properties and OPS components are within expected ranges.
2. Unknown FCFP\_2 feature: -332197802: [\*][c]1:[\*]:[\*]:[c](:[\*]):n:1:n:[\*]
3. Unknown FCFP\_2 feature: -885461129: [\*]NNC(=[\*])[\*]

### Feature Contribution

#### Top features for positive contribution

| Fingerprint | Bit/Smiles | Feature Structure          | Score |
|-------------|------------|----------------------------|-------|
| FCFP_2      | -885550502 | <br>[*][C]([*])NC(=[*])[*] | 0.115 |

|                                               |                   |                                                                                                     |              |
|-----------------------------------------------|-------------------|-----------------------------------------------------------------------------------------------------|--------------|
| FCFP_2                                        | 3                 | 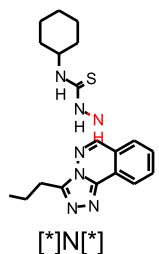<br>[*]N[*]       | 0.0737       |
| FCFP_2                                        | 17                | <br>[*]:n:[*]    | 0.0441       |
| <b>Top Features for negative contribution</b> |                   |                                                                                                     |              |
| <b>Fingerprint</b>                            | <b>Bit/Smiles</b> | <b>Feature Structure</b>                                                                            | <b>Score</b> |
| FCFP_2                                        | -1272798659       | <br>[*]CCC       | -0.111       |
| FCFP_2                                        | 1872154524        | <br>[*]C(=O)[*] | -0.105       |
| FCFP_2                                        | 1                 | <br>[*]=O      | -0.0796      |





9a

TOPKAT\_Rat\_Maximum\_Tolerated\_Dose\_Feed

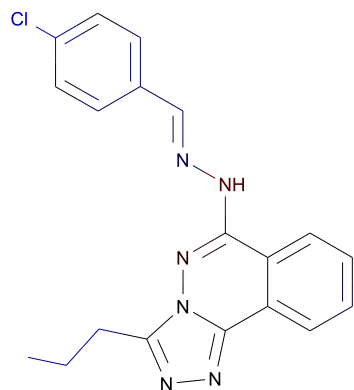

$C_{19}H_{17}ClN_6$   
 Molecular Weight: 364.83147  
 ALogP: 4.967  
 Rotatable Bonds: 5  
 Acceptors: 5  
 Donors: 1

### Model Prediction

Prediction: 0.29  
 Unit: g/kg\_body\_weight  
 Mahalanobis Distance: 11.7  
 Mahalanobis Distance p-value: 3.8e-008

Mahalanobis Distance: The Mahalanobis distance (MD) is a generalization of the Euclidean distance that accounts for correlations among the X properties. It is calculated as the distance to the center of the training data. The larger the MD, the less trustworthy the prediction.

Mahalanobis Distance p-value: The p-value gives the fraction of training data with an MD greater than or equal to the one for the given sample, assuming normally distributed data. The smaller the p-value, the less trustworthy the prediction. For highly non-normal X properties (e.g., fingerprints), the MD p-value is wildly inaccurate.

### Structural Similar Compounds

| Name                        | C.I.PIGMENT RED 3 | PHENOLPHTHALEIN | CHLORBENZILATE |
|-----------------------------|-------------------|-----------------|----------------|
| Structure                   |                   |                 |                |
| Actual Endpoint (-log C)    | 2.65635           | 2.20184         | 3.38252        |
| Predicted Endpoint (-log C) | 2.97957           | 2.8857          | 3.27894        |
| Distance                    | 0.716             | 0.761           | 0.788          |
| Reference                   | NCI/NTP TR-407    | NCI/NTP TR-465  | NCI/NTP TR-75  |

### Model Applicability

Unknown features are fingerprint features in the query molecule, but not found or appearing too infrequently in the training set.

1. All properties and OPS components are within expected ranges.
2. Unknown FCFP\_2 feature: -332197802: [\*][c]1:[\*]:[\*]:[c]([\*]):n:1:n:[\*]
3. Unknown FCFP\_2 feature: 1294285001: [\*]=NN[c]([\*]):[\*]

### Feature Contribution

#### Top features for positive contribution

| Fingerprint | Bit/Smiles | Feature Structure | Score  |
|-------------|------------|-------------------|--------|
| FCFP_2      | 3          | <br>[*]N[*]       | 0.0737 |

|                                               |                   |                                                                                                                       |              |
|-----------------------------------------------|-------------------|-----------------------------------------------------------------------------------------------------------------------|--------------|
| FCFP_2                                        | 17                | 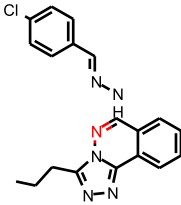<br>[*]:n:[*]                      | 0.0441       |
| <b>Top Features for negative contribution</b> |                   |                                                                                                                       |              |
| <b>Fingerprint</b>                            | <b>Bit/Smiles</b> | <b>Feature Structure</b>                                                                                              | <b>Score</b> |
| FCFP_2                                        | 71476542          | <br>[*]:[c](:[*])Cl                | -0.134       |
| FCFP_2                                        | -1272798659       | <br>[*]CCC                         | -0.111       |
| FCFP_2                                        | 203677720         | <br>[*]=C[c](:[cH]:[*]):[cH]:[*] | -0.0829      |

9b

TOPKAT\_Rat\_Maximum\_Tolerated\_Dose\_Feed

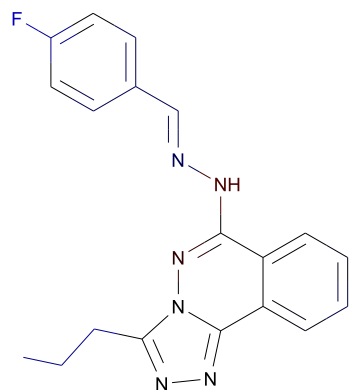C<sub>19</sub>H<sub>17</sub>FN<sub>6</sub>

Molecular Weight: 348.37688

ALogP: 4.508

Rotatable Bonds: 5

Acceptors: 5

Donors: 1

### Model Prediction

Prediction: 0.311

Unit: g/kg\_body\_weight

Mahalanobis Distance: 11.9

Mahalanobis Distance p-value: 2.12e-008

Mahalanobis Distance: The Mahalanobis distance (MD) is a generalization of the Euclidean distance that accounts for correlations among the X properties. It is calculated as the distance to the center of the training data. The larger the MD, the less trustworthy the prediction.

Mahalanobis Distance p-value: The p-value gives the fraction of training data with an MD greater than or equal to the one for the given sample, assuming normally distributed data. The smaller the p-value, the less trustworthy the prediction. For highly non-normal X properties (e.g., fingerprints), the MD p-value is wildly inaccurate.

### Structural Similar Compounds

| Name                        | C.I.PIGMENT RED 3 | PHENOLPHTHALEIN | CHLORBENZILATE |
|-----------------------------|-------------------|-----------------|----------------|
| Structure                   |                   |                 |                |
| Actual Endpoint (-log C)    | 2.65635           | 2.20184         | 3.38252        |
| Predicted Endpoint (-log C) | 2.97957           | 2.8857          | 3.27894        |
| Distance                    | 0.715             | 0.748           | 0.781          |
| Reference                   | NCI/NTP TR-407    | NCI/NTP TR-465  | NCI/NTP TR-75  |

### Model Applicability

Unknown features are fingerprint features in the query molecule, but not found or appearing too infrequently in the training set.

1. All properties and OPS components are within expected ranges.
2. Unknown FCFP\_2 feature: -332197802: [\*][c]1:[\*]:[\*]:[c]([\*]):n:1:n:[\*]
3. Unknown FCFP\_2 feature: 1294285001: [\*]=NN[c]([\*]):[\*]

### Feature Contribution

#### Top features for positive contribution

| Fingerprint | Bit/Smiles | Feature Structure | Score  |
|-------------|------------|-------------------|--------|
| FCFP_2      | 3          | <br>[*]N[*]       | 0.0737 |

|                                               |                   |                                                                                                                       |              |
|-----------------------------------------------|-------------------|-----------------------------------------------------------------------------------------------------------------------|--------------|
| FCFP_2                                        | 17                | 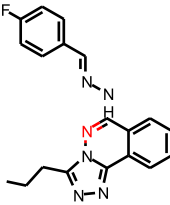<br>[*]:n:[*]                      | 0.0441       |
| <b>Top Features for negative contribution</b> |                   |                                                                                                                       |              |
| <b>Fingerprint</b>                            | <b>Bit/Smiles</b> | <b>Feature Structure</b>                                                                                              | <b>Score</b> |
| FCFP_2                                        | 71476542          | <br>[*]:[c](:[*])Cl                | -0.134       |
| FCFP_2                                        | -1272798659       | <br>[*]CCC                         | -0.111       |
| FCFP_2                                        | 203677720         | <br>[*]=C[c](:[cH]:[*]):[cH]:[*] | -0.0829      |

9c

TOPKAT\_Rat\_Maximum\_Tolerated\_Dose\_Feed

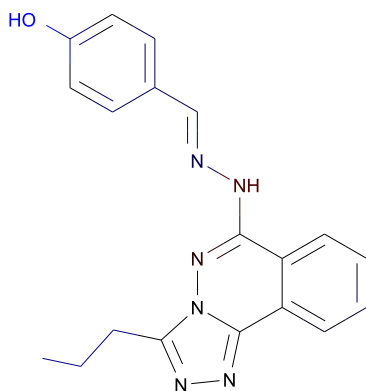C<sub>19</sub>H<sub>18</sub>N<sub>6</sub>O

Molecular Weight: 346.38582

ALogP: 4.061

Rotatable Bonds: 5

Acceptors: 6

Donors: 2

### Model Prediction

Prediction: 0.779

Unit: g/kg\_body\_weight

Mahalanobis Distance: 10.6

Mahalanobis Distance p-value: 4.05e-006

Mahalanobis Distance: The Mahalanobis distance (MD) is a generalization of the Euclidean distance that accounts for correlations among the X properties. It is calculated as the distance to the center of the training data. The larger the MD, the less trustworthy the prediction.

Mahalanobis Distance p-value: The p-value gives the fraction of training data with an MD greater than or equal to the one for the given sample, assuming normally distributed data. The smaller the p-value, the less trustworthy the prediction. For highly non-normal X properties (e.g., fingerprints), the MD p-value is wildly inaccurate.

### Structural Similar Compounds

| Name                        | C.I.PIGMENT RED 3 | PHENOLPHTHALEIN | DISPERSE YELLOW 3 |
|-----------------------------|-------------------|-----------------|-------------------|
| Structure                   |                   |                 |                   |
| Actual Endpoint (-log C)    | 2.65635           | 2.20184         | 2.77703           |
| Predicted Endpoint (-log C) | 2.97957           | 2.8857          | 2.80195           |
| Distance                    | 0.654             | 0.675           | 0.814             |
| Reference                   | NCI/NTP TR-407    | NCI/NTP TR-465  | NCI/NTP TR-222    |

### Model Applicability

Unknown features are fingerprint features in the query molecule, but not found or appearing too infrequently in the training set.

1. All properties and OPS components are within expected ranges.
2. Unknown FCFP\_2 feature: -332197802: [\*][c]1:[\*]:[\*]:[c](:[\*]):n:1:n:[\*]
3. Unknown FCFP\_2 feature: 1294285001: [\*]=NN[c](:[\*]):[\*]

### Feature Contribution

#### Top features for positive contribution

| Fingerprint | Bit/Smiles | Feature Structure | Score  |
|-------------|------------|-------------------|--------|
| FCFP_2      | 3          |                   | 0.0737 |

| FCFP_2                                 | 17          | 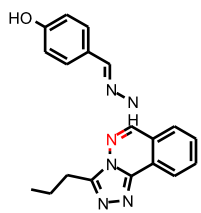<br>[*]:n:[*]       | 0.0441 |
|----------------------------------------|-------------|-------------------------------------------------------------------------------------------------------|--------|
| Top Features for negative contribution |             |                                                                                                       |        |
| Fingerprint                            | Bit/Smiles  | Feature Structure                                                                                     | Score  |
| FCFP_2                                 | 7           | <br>[*]O           | -0.214 |
| FCFP_2                                 | -549108873  | <br>[*]:[c](:[*])O | -0.127 |
| FCFP_2                                 | -1272798659 | <br>[*]CCC        | -0.111 |

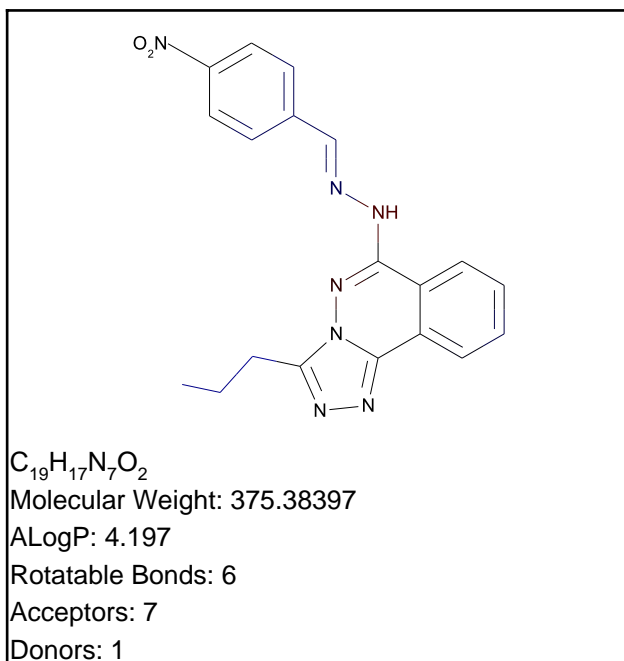

### Model Prediction

Prediction: 0.177

Unit: g/kg\_body\_weight

Mahalanobis Distance: 10.5

Mahalanobis Distance p-value: 6.76e-006

Mahalanobis Distance: The Mahalanobis distance (MD) is a generalization of the Euclidean distance that accounts for correlations among the X properties. It is calculated as the distance to the center of the training data. The larger the MD, the less trustworthy the prediction.

Mahalanobis Distance p-value: The p-value gives the fraction of training data with an MD greater than or equal to the one for the given sample, assuming normally distributed data. The smaller the p-value, the less trustworthy the prediction. For highly non-normal X properties (e.g., fingerprints), the MD p-value is wildly inaccurate.

### Structural Similar Compounds

| Name                        | C.I.PIGMENT RED 3                                                                   | SALICYLAZOSULFAPYRIDINE                                                             | C.I.PIGMENT RED 23                                                                  |
|-----------------------------|-------------------------------------------------------------------------------------|-------------------------------------------------------------------------------------|-------------------------------------------------------------------------------------|
| Structure                   | 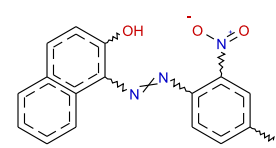 |  |  |
| Actual Endpoint (-log C)    | 2.65635                                                                             | 3.375                                                                               | 2.30052                                                                             |
| Predicted Endpoint (-log C) | 2.97957                                                                             | 2.80292                                                                             | 3.55333                                                                             |
| Distance                    | 0.771                                                                               | 0.840                                                                               | 0.905                                                                               |
| Reference                   | NCI/NTP TR-407                                                                      | NCI/NTP TR-457                                                                      | NCI/NTP TR-411                                                                      |

### Model Applicability

Unknown features are fingerprint features in the query molecule, but not found or appearing too infrequently in the training set.

1. All properties and OPS components are within expected ranges.
2. Unknown FCFP\_2 feature: 8: [\*][N+](=\*)[\*]
3. Unknown FCFP\_2 feature: 5: [\*][O-]
4. Unknown FCFP\_2 feature: -332197802: [\*][c]1:[\*]:[\*]:[c](:[\*]):n:1:n:[\*]
5. Unknown FCFP\_2 feature: 1294285001: [\*]=NN[c](:[\*]):[\*]
6. Unknown FCFP\_2 feature: -828984032: [\*][N+](=\*)[c](:[cH]:[\*]):[cH]:[\*]
7. Unknown FCFP\_2 feature: -1338588315: [\*]:[c](:[\*])[N+](=O)[O-]
8. Unknown FCFP\_2 feature: 1872392852: [\*][N+](=O)[\*]
9. Unknown FCFP\_2 feature: 260476081: [\*][N+](=\*)[O-]

### Feature Contribution

#### Top features for positive contribution

| Fingerprint | Bit/Smiles | Feature Structure | Score |
|-------------|------------|-------------------|-------|
|             |            |                   |       |



|                                               |                   |                                                                                                                       |              |
|-----------------------------------------------|-------------------|-----------------------------------------------------------------------------------------------------------------------|--------------|
| FCFP_2                                        | 3                 | 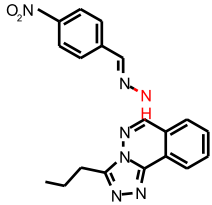<br>[*]N[*]                        | 0.0737       |
| FCFP_2                                        | 17                | <br>[*]:n:[*]                      | 0.0441       |
| <b>Top Features for negative contribution</b> |                   |                                                                                                                       |              |
| <b>Fingerprint</b>                            | <b>Bit/Smiles</b> | <b>Feature Structure</b>                                                                                              | <b>Score</b> |
| FCFP_2                                        | -1272798659       | <br>[*]CCC                         | -0.111       |
| FCFP_2                                        | 203677720         | <br>[*]=C[c](:[cH]:[*]):[cH]:[*] | -0.0829      |
| FCFP_2                                        | 1                 | <br>[*]=O                        | -0.0796      |



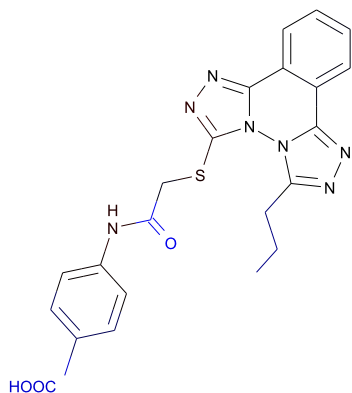
 $C_{22}H_{19}N_7O_3S$ 

Molecular Weight: 461.49635

ALogP: 3.42

Rotatable Bonds: 7

Acceptors: 8

Donors: 2

### Model Prediction

Prediction: 0.429

Unit: g/kg\_body\_weight

Mahalanobis Distance: 13.2

Mahalanobis Distance p-value: 5.35e-011

Mahalanobis Distance: The Mahalanobis distance (MD) is a generalization of the Euclidean distance that accounts for correlations among the X properties. It is calculated as the distance to the center of the training data. The larger the MD, the less trustworthy the prediction.

Mahalanobis Distance p-value: The p-value gives the fraction of training data with an MD greater than or equal to the one for the given sample, assuming normally distributed data. The smaller the p-value, the less trustworthy the prediction. For highly non-normal X properties (e.g., fingerprints), the MD p-value is wildly inaccurate.

### Structural Similar Compounds

| Name                        | C.I.PIGMENT RED 23 | SALICYLAZOSULFAPYRIDINE | RESERPINE      |
|-----------------------------|--------------------|-------------------------|----------------|
| Structure                   |                    |                         |                |
| Actual Endpoint (-log C)    | 2.30052            | 3.375                   | 6.13118        |
| Predicted Endpoint (-log C) | 3.55333            | 2.80292                 | 4.38304        |
| Distance                    | 0.650              | 0.779                   | 0.999          |
| Reference                   | NCI/NTP TR-411     | NCI/NTP TR-457          | NCI/NTP TR-193 |

### Model Applicability

Unknown features are fingerprint features in the query molecule, but not found or appearing too infrequently in the training set.

1. Num\_AromaticRings out of range. Value: 5. Training min, max, mean, SD: 0, 4, 1.1685, 0.8469.
2. Unknown FCFP\_2 feature: -1410079687: [\*]S[c]1:n:[\*]:[\*]:n:1:[\*]
3. Unknown FCFP\_2 feature: -332197802: [\*][c]1:[\*]:[\*]:[c]([\*]):n:1:n:[\*]

### Feature Contribution

#### Top features for positive contribution

| Fingerprint | Bit/Smiles | Feature Structure     | Score  |
|-------------|------------|-----------------------|--------|
| FCFP_2      | 1036089772 | <br>[*]CS[c]([*]):[*] | 0.0749 |

|                                               |                   |                                                                                                              |              |
|-----------------------------------------------|-------------------|--------------------------------------------------------------------------------------------------------------|--------------|
| FCFP_2                                        | 3                 | 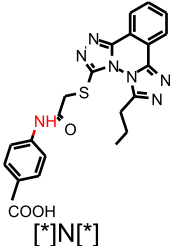<br>COOH<br>[*]N[*]       | 0.0737       |
| FCFP_2                                        | 17                | <br>COOH<br>[*]:n:[*]     | 0.0441       |
| <b>Top Features for negative contribution</b> |                   |                                                                                                              |              |
| <b>Fingerprint</b>                            | <b>Bit/Smiles</b> | <b>Feature Structure</b>                                                                                     | <b>Score</b> |
| FCFP_2                                        | 7                 | <br>COOH<br>[*]O          | -0.214       |
| FCFP_2                                        | -548632217        | <br>COOH<br>[*]C(=[*])O | -0.119       |
| FCFP_2                                        | -1272798659       | <br>COOH<br>[*]CCC      | -0.111       |



14b

TOPKAT\_Rat\_Maximum\_Tolerated\_Dose\_Feed

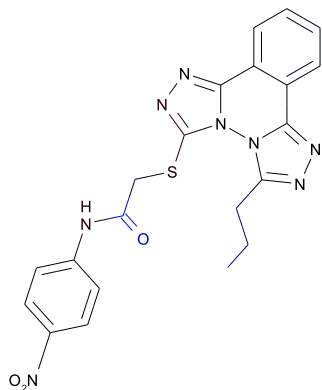C<sub>21</sub>H<sub>18</sub>N<sub>8</sub>O<sub>3</sub>S

Molecular Weight: 462.48441

ALogP: 3.685

Rotatable Bonds: 7

Acceptors: 8

Donors: 1

### Model Prediction

Prediction: 0.0899

Unit: g/kg\_body\_weight

Mahalanobis Distance: 13

Mahalanobis Distance p-value: 1.37e-010

Mahalanobis Distance: The Mahalanobis distance (MD) is a generalization of the Euclidean distance that accounts for correlations among the X properties. It is calculated as the distance to the center of the training data. The larger the MD, the less trustworthy the prediction.

Mahalanobis Distance p-value: The p-value gives the fraction of training data with an MD greater than or equal to the one for the given sample, assuming normally distributed data. The smaller the p-value, the less trustworthy the prediction. For highly non-normal X properties (e.g., fingerprints), the MD p-value is wildly inaccurate.

### Structural Similar Compounds

| Name                        | C.I.PIGMENT RED 23 | SALICYLAZOSULFAPYRIDINE | RESERPINE      |
|-----------------------------|--------------------|-------------------------|----------------|
| Structure                   |                    |                         |                |
| Actual Endpoint (-log C)    | 2.30052            | 3.375                   | 6.13118        |
| Predicted Endpoint (-log C) | 3.55333            | 2.80292                 | 4.38304        |
| Distance                    | 0.698              | 0.924                   | 1.020          |
| Reference                   | NCI/NTP TR-411     | NCI/NTP TR-457          | NCI/NTP TR-193 |

### Model Applicability

Unknown features are fingerprint features in the query molecule, but not found or appearing too infrequently in the training set.

1. Num\_AromaticRings out of range. Value: 5. Training min, max, mean, SD: 0, 4, 1.1685, 0.8469.
2. OPS\_PC9 out of range. Value: 4.4579. Training min, max, SD, explained variance: -2.8548, 3.3954, 1.263, 0.0360.
3. Unknown FCFP\_2 feature: 8: [\*][N+](=O)[\*]
4. Unknown FCFP\_2 feature: 5: [\*][O-]
5. Unknown FCFP\_2 feature: -1410079687: [\*]S[c]1:n:[\*]:[\*]:n:1:[\*]
6. Unknown FCFP\_2 feature: -332197802: [\*][c]1:[\*]:[\*]:[c](:[\*]):n:1:n:[\*]
7. Unknown FCFP\_2 feature: -828984032: [\*][N+](=O)[c](:[cH]:[\*]):[cH]:[\*]
8. Unknown FCFP\_2 feature: -1338588315: [\*]:[c](:[\*])[N+](=O)[O-]
9. Unknown FCFP\_2 feature: 1872392852: [\*][N+](=O)[\*]
10. Unknown FCFP\_2 feature: 260476081: [\*][N+](=O)[O-]

### Feature Contribution

#### Top features for positive contribution

| Fingerprint | Bit/Smiles | Feature Structure | Score |
|-------------|------------|-------------------|-------|
|             |            |                   |       |

|                                               |                   |                                                                                                          |              |
|-----------------------------------------------|-------------------|----------------------------------------------------------------------------------------------------------|--------------|
| FCFP_2                                        | 1036089772        | 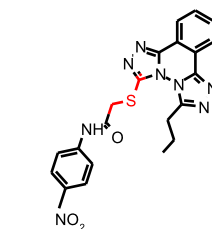<br>[*]CS[c](:[*]):[*] | 0.0749       |
| FCFP_2                                        | 3                 | <br>[*]N[*]           | 0.0737       |
| FCFP_2                                        | 17                | <br>[*]:n:[*]         | 0.0441       |
| <b>Top Features for negative contribution</b> |                   |                                                                                                          |              |
| <b>Fingerprint</b>                            | <b>Bit/Smiles</b> | <b>Feature Structure</b>                                                                                 | <b>Score</b> |
| FCFP_2                                        | -1272798659       | <br>[*]CCC           | -0.111       |
| FCFP_2                                        | 1872154524        | <br>[*]C(=O)[*]     | -0.105       |

|        |   |                                                                                              |         |
|--------|---|----------------------------------------------------------------------------------------------|---------|
| FCFP_2 | 1 | 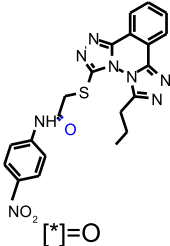<br>[*]=O | -0.0796 |
|--------|---|----------------------------------------------------------------------------------------------|---------|



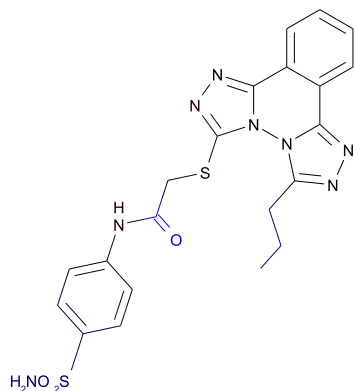

$C_{21}H_{20}N_8O_3S_2$

Molecular Weight: 496.56529

ALogP: 2.496

Rotatable Bonds: 7

Acceptors: 8

Donors: 2

### Model Prediction

Prediction: 0.0954

Unit: g/kg\_body\_weight

Mahalanobis Distance: 14.1

Mahalanobis Distance p-value: 7.51e-013

Mahalanobis Distance: The Mahalanobis distance (MD) is a generalization of the Euclidean distance that accounts for correlations among the X properties. It is calculated as the distance to the center of the training data. The larger the MD, the less trustworthy the prediction.

Mahalanobis Distance p-value: The p-value gives the fraction of training data with an MD greater than or equal to the one for the given sample, assuming normally distributed data. The smaller the p-value, the less trustworthy the prediction. For highly non-normal X properties (e.g., fingerprints), the MD p-value is wildly inaccurate.

### Structural Similar Compounds

| Name                        | C.I.PIGMENT RED 23 | SALICYLAZOSULFAPYRIDINE | 4,4'-DIAMINO-2,2'-STILBENEDISULFONIC ACID.2NaSALT |
|-----------------------------|--------------------|-------------------------|---------------------------------------------------|
| Structure                   |                    |                         |                                                   |
| Actual Endpoint (-log C)    | 2.30052            | 3.375                   | 2.50759                                           |
| Predicted Endpoint (-log C) | 3.55333            | 2.80292                 | 3.26068                                           |
| Distance                    | 0.675              | 0.870                   | 1.078                                             |
| Reference                   | NCI/NTP TR-411     | NCI/NTP TR-457          | NCI/NTP TR-412                                    |

### Model Applicability

Unknown features are fingerprint features in the query molecule, but not found or appearing too infrequently in the training set.

1. Num\_AromaticRings out of range. Value: 5. Training min, max, mean, SD: 0, 4, 1.1685, 0.8469.
2. OPS\_PC9 out of range. Value: 4.4353. Training min, max, SD, explained variance: -2.8548, 3.3954, 1.263, 0.0360.
3. Unknown FCFP\_2 feature: -1410079687: [\*]S[c]1:n:[\*]:[\*]:n:1:[\*]
4. Unknown FCFP\_2 feature: -332197802: [\*][c]1:[\*]:[\*]:[c](:[\*]):n:1:n:[\*]

### Feature Contribution

#### Top features for positive contribution

| Fingerprint | Bit/Smiles | Feature Structure      | Score  |
|-------------|------------|------------------------|--------|
| FCFP_2      | 1036089772 | <br>[*]CS[c](:[*]):[*] | 0.0749 |

|                                               |                   |                                                                                                                                         |              |
|-----------------------------------------------|-------------------|-----------------------------------------------------------------------------------------------------------------------------------------|--------------|
| FCFP_2                                        | 3                 | 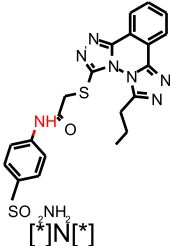<br>SO <sub>2</sub> NH <sub>2</sub><br>[*]N[*]       | 0.0737       |
| FCFP_2                                        | 17                | <br>SO <sub>2</sub> NH <sub>2</sub><br>[*]:n:[*]     | 0.0441       |
| <b>Top Features for negative contribution</b> |                   |                                                                                                                                         |              |
| <b>Fingerprint</b>                            | <b>Bit/Smiles</b> | <b>Feature Structure</b>                                                                                                                | <b>Score</b> |
| FCFP_2                                        | -1272798659       | <br>SO <sub>2</sub> NH <sub>2</sub><br>[*]CCC        | -0.111       |
| FCFP_2                                        | 1872154524        | <br>SO <sub>2</sub> NH <sub>2</sub><br>[*]C(=O)[*] | -0.105       |
| FCFP_2                                        | 203677720         | <br>[*]=C[c](:[cH]:[*]):[cH]:[*]                   | -0.0829      |



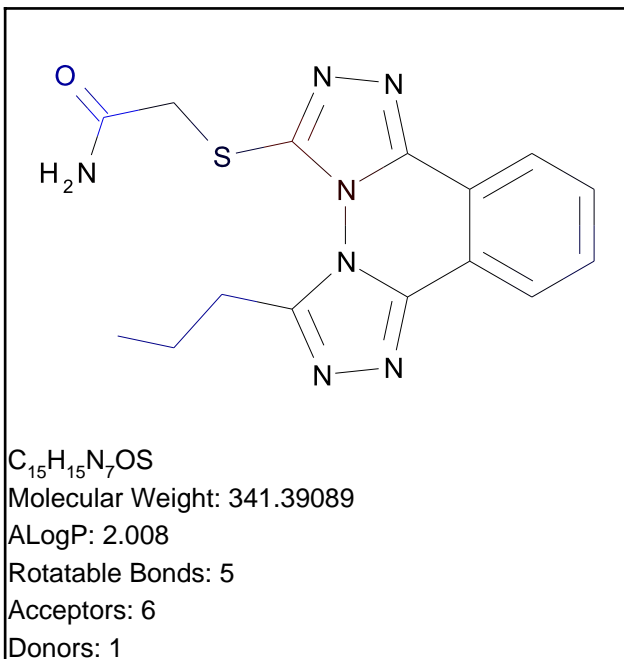

### Model Prediction

Prediction: 0.118

Unit: g/kg\_body\_weight

Mahalanobis Distance: 12.2

Mahalanobis Distance p-value: 4.36e-009

Mahalanobis Distance: The Mahalanobis distance (MD) is a generalization of the Euclidean distance that accounts for correlations among the X properties. It is calculated as the distance to the center of the training data. The larger the MD, the less trustworthy the prediction.

Mahalanobis Distance p-value: The p-value gives the fraction of training data with an MD greater than or equal to the one for the given sample, assuming normally distributed data. The smaller the p-value, the less trustworthy the prediction. For highly non-normal X properties (e.g., fingerprints), the MD p-value is wildly inaccurate.

### Structural Similar Compounds

| Name                        | C.I.PIGMENT RED 3                                                                   | SALICYLAZOSULFAPYRIDINE                                                             | TRIAMTERENE                                                                         |
|-----------------------------|-------------------------------------------------------------------------------------|-------------------------------------------------------------------------------------|-------------------------------------------------------------------------------------|
| Structure                   | 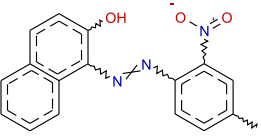 |  |  |
| Actual Endpoint (-log C)    | 2.65635                                                                             | 3.375                                                                               | 4.00564                                                                             |
| Predicted Endpoint (-log C) | 2.97957                                                                             | 2.80292                                                                             | 3.1992                                                                              |
| Distance                    | 0.831                                                                               | 0.846                                                                               | 0.884                                                                               |
| Reference                   | NCI/NTP TR-407                                                                      | NCI/NTP TR-457                                                                      | NCI/NTP TR-420                                                                      |

### Model Applicability

Unknown features are fingerprint features in the query molecule, but not found or appearing too infrequently in the training set.

1. All properties and OPS components are within expected ranges.
2. Unknown FCFP\_2 feature: -332197802: [\*][c]1:[\*]:[\*]:[c](:[\*]):n:1:n:[\*]
3. Unknown FCFP\_2 feature: -1410079687: [\*]S[c]1:n:[\*]:[\*]:n:1:[\*]

### Feature Contribution

#### Top features for positive contribution

| Fingerprint | Bit/Smiles | Feature Structure                                                                                                        | Score  |
|-------------|------------|--------------------------------------------------------------------------------------------------------------------------|--------|
| FCFP_2      | 1036089772 | 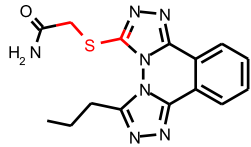<br><chem>[*]CS[c](:[*]):[*]</chem> | 0.0749 |

|                                               |                   |                                                                                                      |              |
|-----------------------------------------------|-------------------|------------------------------------------------------------------------------------------------------|--------------|
| FCFP_2                                        | 3                 | 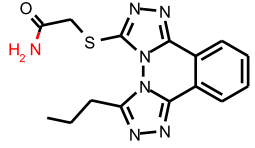<br>[*]N[*]       | 0.0737       |
| FCFP_2                                        | 17                | <br>[*]:n:[*]     | 0.0441       |
| <b>Top Features for negative contribution</b> |                   |                                                                                                      |              |
| <b>Fingerprint</b>                            | <b>Bit/Smiles</b> | <b>Feature Structure</b>                                                                             | <b>Score</b> |
| FCFP_2                                        | -1272798659       | <br>[*]CCC        | -0.111       |
| FCFP_2                                        | 1872154524        | <br>[*]C(=O)[*] | -0.105       |
| FCFP_2                                        | 1                 | <br>[*]=O       | -0.0796      |



# Doxorubicin

# TOPKAT\_Rat\_Maximum\_Tolerated\_Dose\_Feed

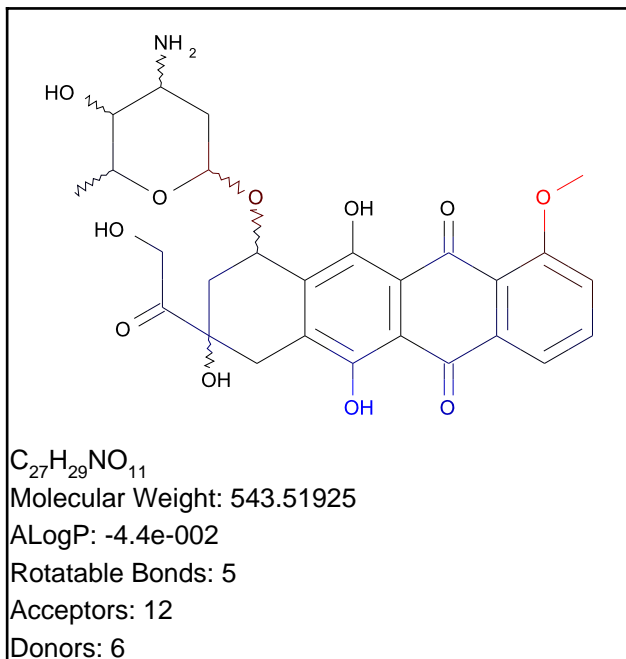

## Model Prediction

Prediction: 0.277

Unit: g/kg\_body\_weight

Mahalanobis Distance: 11.1

Mahalanobis Distance p-value: 5.33e-007

Mahalanobis Distance: The Mahalanobis distance (MD) is a generalization of the Euclidean distance that accounts for correlations among the X properties. It is calculated as the distance to the center of the training data. The larger the MD, the less trustworthy the prediction.

Mahalanobis Distance p-value: The p-value gives the fraction of training data with an MD greater than or equal to the one for the given sample, assuming normally distributed data. The smaller the p-value, the less trustworthy the prediction. For highly non-normal X properties (e.g., fingerprints), the MD p-value is wildly inaccurate.

## Structural Similar Compounds

| Name                        | OXYTETRACYCLINE                                                                     | 4,4'-DIAMINO-2,2'-STILBENEDISULFONIC ACID.2NaSALT                                   | ERYTHROMYCIN                                                                        |
|-----------------------------|-------------------------------------------------------------------------------------|-------------------------------------------------------------------------------------|-------------------------------------------------------------------------------------|
| Structure                   | 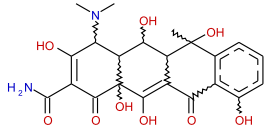 |  |  |
| Actual Endpoint (-log C)    | 2.36214                                                                             | 2.50759                                                                             | 3.29629                                                                             |
| Predicted Endpoint (-log C) | 2.77834                                                                             | 3.26068                                                                             | 4.83895                                                                             |
| Distance                    | 0.706                                                                               | 0.916                                                                               | 1.034                                                                               |
| Reference                   | NCI/NTP TR-315                                                                      | NCI/NTP TR-412                                                                      | NCI/NTP TR-338                                                                      |

## Model Applicability

Unknown features are fingerprint features in the query molecule, but not found or appearing too infrequently in the training set.

- Molecular\_PolarSurfaceArea out of range. Value: 206.07. Training min, max, mean, SD: 0, 201.84, 63.052, 40.7.
- Unknown FCFP\_2 feature: 1186333723: [\*]CC(O[\*])[c](:[\*]):[\*]

## Feature Contribution

### Top features for positive contribution

| Fingerprint | Bit/Smiles | Feature Structure                                                                              | Score |
|-------------|------------|------------------------------------------------------------------------------------------------|-------|
| FCFP_2      | 136627117  | 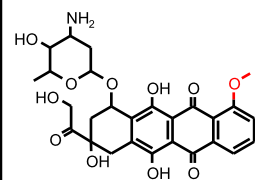<br>[*]OC | 0.173 |

|                                               |                   |                                                                                                                         |              |
|-----------------------------------------------|-------------------|-------------------------------------------------------------------------------------------------------------------------|--------------|
| FCFP_2                                        | -1143715940       | 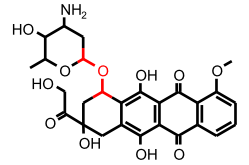<br><chem>[*]C([*])OC([*])[*]</chem> | 0.095        |
| FCFP_2                                        | 1036089772        | <br><chem>[*]CS[c](:[*]):[*]</chem>  | 0.0749       |
| <b>Top Features for negative contribution</b> |                   |                                                                                                                         |              |
| <b>Fingerprint</b>                            | <b>Bit/Smiles</b> | <b>Feature Structure</b>                                                                                                | <b>Score</b> |
| FCFP_2                                        | 7                 | <br><chem>[*]O</chem>                | -0.214       |
| FCFP_2                                        | -549108873        | <br><chem>[*]:[c](:[*])O</chem>    | -0.127       |
| FCFP_2                                        | -1272798659       | <br><chem>[*]CCC</chem>            | -0.111       |





7a

TOPKAT\_Rat\_Maximum\_Tolerated\_Dose\_Gavage

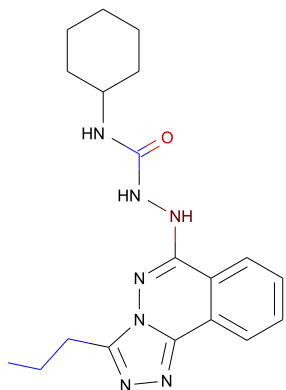C<sub>19</sub>H<sub>25</sub>N<sub>7</sub>O

Molecular Weight: 367.44809

ALogP: 3.681

Rotatable Bonds: 5

Acceptors: 5

Donors: 3

**Model Prediction**

Prediction: 0.00961

Unit: g/kg\_body\_weight

Mahalanobis Distance: 14

Mahalanobis Distance p-value: 1.21e-011

Mahalanobis Distance: The Mahalanobis distance (MD) is a generalization of the Euclidean distance that accounts for correlations among the X properties. It is calculated as the distance to the center of the training data. The larger the MD, the less trustworthy the prediction.

Mahalanobis Distance p-value: The p-value gives the fraction of training data with an MD greater than or equal to the one for the given sample, assuming normally distributed data. The smaller the p-value, the less trustworthy the prediction. For highly non-normal X properties (e.g., fingerprints), the MD p-value is wildly inaccurate.

**Structural Similar Compounds**

| Name                        | OCHRATOXIN     | SULFISOOXAZOLE | PENICILLIN VK  |
|-----------------------------|----------------|----------------|----------------|
| Structure                   |                |                |                |
| Actual Endpoint (-log C)    | 6.28396        | 2.82494        | 2.54455        |
| Predicted Endpoint (-log C) | 5.12358        | 3.0705         | 3.9702         |
| Distance                    | 0.706          | 0.886          | 1.038          |
| Reference                   | NCI/NTP TR-358 | NCI/NTP TR-138 | NCI/NTP TR-336 |

**Model Applicability**

Unknown features are fingerprint features in the query molecule, but not found or appearing too infrequently in the training set.

1. Num\_AromaticRings out of range. Value: 3. Training min, max, mean, SD: 0, 2, 0.5625, 0.693.
2. OPS\_PC9 out of range. Value: -2.7104. Training min, max, SD, explained variance: -2.7086, 2.9267, 1.019, 0.0321.
3. Unknown FCFP\_2 feature: -332197802: [\*][c]1:[\*]:[\*]:[c](:[\*]):n:1:n:[\*]
4. Unknown FCFP\_2 feature: -1564473960: [\*]:n1:[\*]:[\*]:n:[c]:1:[c](:[\*]):[\*]
5. Unknown FCFP\_2 feature: 1294344583: [\*]NN[c](:[\*]):[\*]
6. Unknown FCFP\_2 feature: -1539162406: [\*]C[c]1:n:[\*]:[\*]:n:1:[\*]
7. Unknown FCFP\_2 feature: -885461129: [\*]NNC(=[\*])[\*]
8. Unknown FCFP\_2 feature: 1499521844: [\*]NC(=O)N[\*]

**Feature Contribution****Top features for positive contribution**

| Fingerprint | Bit/Smiles | Feature Structure | Score |
|-------------|------------|-------------------|-------|
|             |            |                   |       |

|                                               |                   |                                                                                                      |              |
|-----------------------------------------------|-------------------|------------------------------------------------------------------------------------------------------|--------------|
| FCFP_2                                        | 1                 | 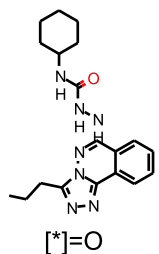<br>[*]=O          | 0.511        |
| FCFP_2                                        | 3                 | <br>[*]N[*]       | 0.104        |
| FCFP_2                                        | -1272798659       | <br>[*]CCC        | 0.0703       |
| <b>Top Features for negative contribution</b> |                   |                                                                                                      |              |
| <b>Fingerprint</b>                            | <b>Bit/Smiles</b> | <b>Feature Structure</b>                                                                             | <b>Score</b> |
| FCFP_2                                        | 136597326         | <br>[*]CC        | -0.489       |
| FCFP_2                                        | 1872154524        | <br>[*]C(=O)[*] | -0.307       |

FCFP\_2

0

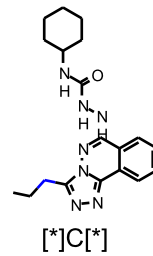

-0.29

7b

TOPKAT\_Rat\_Maximum\_Tolerated\_Dose\_Gavage

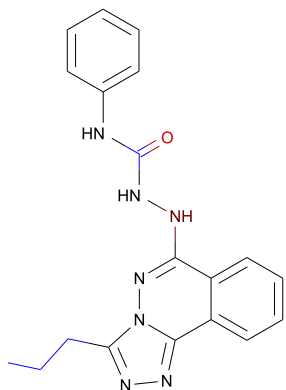C<sub>19</sub>H<sub>19</sub>N<sub>7</sub>O

Molecular Weight: 361.40046

ALogP: 3.399

Rotatable Bonds: 5

Acceptors: 5

Donors: 3

### Model Prediction

Prediction: 0.0102

Unit: g/kg\_body\_weight

Mahalanobis Distance: 16.9

Mahalanobis Distance p-value: 1.3e-015

Mahalanobis Distance: The Mahalanobis distance (MD) is a generalization of the Euclidean distance that accounts for correlations among the X properties. It is calculated as the distance to the center of the training data. The larger the MD, the less trustworthy the prediction.

Mahalanobis Distance p-value: The p-value gives the fraction of training data with an MD greater than or equal to the one for the given sample, assuming normally distributed data. The smaller the p-value, the less trustworthy the prediction. For highly non-normal X properties (e.g., fingerprints), the MD p-value is wildly inaccurate.

### Structural Similar Compounds

| Name                        | OCHRATOXIN     | SULFISOOXAZOLE | PENICILLIN VK  |
|-----------------------------|----------------|----------------|----------------|
| Structure                   |                |                |                |
| Actual Endpoint (-log C)    | 6.28396        | 2.82494        | 2.54455        |
| Predicted Endpoint (-log C) | 5.12358        | 3.0705         | 3.9702         |
| Distance                    | 0.957          | 0.977          | 1.275          |
| Reference                   | NCI/NTP TR-358 | NCI/NTP TR-138 | NCI/NTP TR-336 |

### Model Applicability

Unknown features are fingerprint features in the query molecule, but not found or appearing too infrequently in the training set.

1. Num\_AromaticRings out of range. Value: 4. Training min, max, mean, SD: 0, 2, 0.5625, 0.693.
2. OPS\_PC9 out of range. Value: -2.7992. Training min, max, SD, explained variance: -2.7086, 2.9267, 1.019, 0.0321.
3. Unknown FCFP\_2 feature: -332197802: [\*][c]1:[\*]:[\*]:[c](:[\*]):n:1:n:[\*]
4. Unknown FCFP\_2 feature: -1564473960: [\*]:n1:[\*]:[\*]:n:[c]:1:[c](:[\*]):[\*]
5. Unknown FCFP\_2 feature: 1294344583: [\*]NN[c](:[\*]):[\*]
6. Unknown FCFP\_2 feature: -1539162406: [\*]C[c]1:n:[\*]:[\*]:n:1:[\*]
7. Unknown FCFP\_2 feature: -885461129: [\*]NNC(=[\*])[\*]
8. Unknown FCFP\_2 feature: 1499521844: [\*]NC(=O)N[\*]

### Feature Contribution

#### Top features for positive contribution

| Fingerprint | Bit/Smiles | Feature Structure | Score |
|-------------|------------|-------------------|-------|
|             |            |                   |       |

|                                               |                   |                                                                                                      |              |
|-----------------------------------------------|-------------------|------------------------------------------------------------------------------------------------------|--------------|
| FCFP_2                                        | 1                 | 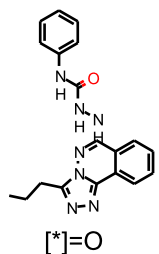<br>[*]=O          | 0.511        |
| FCFP_2                                        | 3                 | <br>[*]N[*]       | 0.104        |
| FCFP_2                                        | -1272798659       | <br>[*]CCC        | 0.0703       |
| <b>Top Features for negative contribution</b> |                   |                                                                                                      |              |
| <b>Fingerprint</b>                            | <b>Bit/Smiles</b> | <b>Feature Structure</b>                                                                             | <b>Score</b> |
| FCFP_2                                        | 136597326         | <br>[*]CC        | -0.489       |
| FCFP_2                                        | 1872154524        | <br>[*]C(=O)[*] | -0.307       |

|        |   |                                                                                                |       |
|--------|---|------------------------------------------------------------------------------------------------|-------|
| FCFP_2 | 0 | 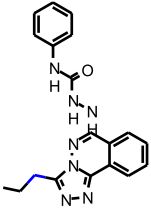<br>[*]C[*] | -0.29 |
|--------|---|------------------------------------------------------------------------------------------------|-------|

8a

TOPKAT\_Rat\_Maximum\_Tolerated\_Dose\_Gavage

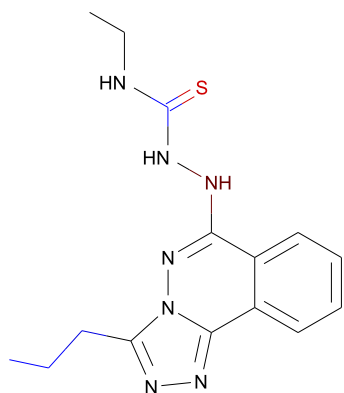C<sub>15</sub>H<sub>19</sub>N<sub>7</sub>S

Molecular Weight: 329.42325

ALogP: 3.388

Rotatable Bonds: 7

Acceptors: 5

Donors: 3

### Model Prediction

Prediction: 0.0421

Unit: g/kg\_body\_weight

Mahalanobis Distance: 12

Mahalanobis Distance p-value: 8.55e-009

Mahalanobis Distance: The Mahalanobis distance (MD) is a generalization of the Euclidean distance that accounts for correlations among the X properties. It is calculated as the distance to the center of the training data. The larger the MD, the less trustworthy the prediction.

Mahalanobis Distance p-value: The p-value gives the fraction of training data with an MD greater than or equal to the one for the given sample, assuming normally distributed data. The smaller the p-value, the less trustworthy the prediction. For highly non-normal X properties (e.g., fingerprints), the MD p-value is wildly inaccurate.

### Structural Similar Compounds

| Name                        | OCHRATOXIN     | SULFISOOXAZOLE | PENICILLIN VK  |
|-----------------------------|----------------|----------------|----------------|
| Structure                   |                |                |                |
| Actual Endpoint (-log C)    | 6.28396        | 2.82494        | 2.54455        |
| Predicted Endpoint (-log C) | 5.12358        | 3.0705         | 3.9702         |
| Distance                    | 0.721          | 0.867          | 1.029          |
| Reference                   | NCI/NTP TR-358 | NCI/NTP TR-138 | NCI/NTP TR-336 |

### Model Applicability

Unknown features are fingerprint features in the query molecule, but not found or appearing too infrequently in the training set.

1. Num\_AromaticRings out of range. Value: 3. Training min, max, mean, SD: 0, 2, 0.5625, 0.693.
2. OPS\_PC9 out of range. Value: -2.8136. Training min, max, SD, explained variance: -2.7086, 2.9267, 1.019, 0.0321.
3. Unknown FCFP\_2 feature: -332197802: [\*][c]1:[\*]:[\*]:[c](:[\*]):n:1:n:[\*]
4. Unknown FCFP\_2 feature: -1564473960: [\*]:n1:[\*]:[\*]:n:[c]:1:[c](:[\*]):[\*]
5. Unknown FCFP\_2 feature: 1294344583: [\*]NN[c](:[\*]):[\*]
6. Unknown FCFP\_2 feature: -1539162406: [\*]C[c]1:n:[\*]:[\*]:n:1:[\*]
7. Unknown FCFP\_2 feature: -885461129: [\*]NNC(=[\*])[\*]
8. Unknown FCFP\_2 feature: 1499521844: [\*]NC(=O)N[\*]

### Feature Contribution

#### Top features for positive contribution

| Fingerprint | Bit/Smiles | Feature Structure | Score |
|-------------|------------|-------------------|-------|
|             |            |                   |       |



|                                               |                   |                                                                                                      |              |
|-----------------------------------------------|-------------------|------------------------------------------------------------------------------------------------------|--------------|
| FCFP_2                                        | 1                 | 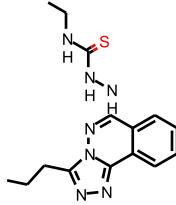<br>[*]=O         | 0.511        |
| FCFP_2                                        | 3                 | <br>[*]N[*]       | 0.104        |
| FCFP_2                                        | -1272798659       | <br>[*]CCC        | 0.0703       |
| <b>Top Features for negative contribution</b> |                   |                                                                                                      |              |
| <b>Fingerprint</b>                            | <b>Bit/Smiles</b> | <b>Feature Structure</b>                                                                             | <b>Score</b> |
| FCFP_2                                        | 136597326         | <br>[*]CC        | -0.489       |
| FCFP_2                                        | 1872154524        | <br>[*]C(=O)[*] | -0.307       |

|        |   |                                                                                                |       |
|--------|---|------------------------------------------------------------------------------------------------|-------|
| FCFP_2 | 0 | 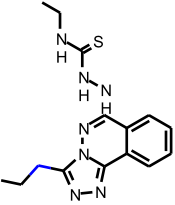<br>[*]C[*] | -0.29 |
|--------|---|------------------------------------------------------------------------------------------------|-------|

8b

TOPKAT\_Rat\_Maximum\_Tolerated\_Dose\_Gavage

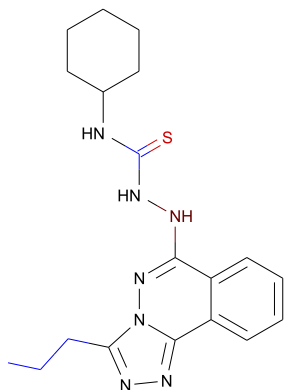C<sub>19</sub>H<sub>25</sub>N<sub>7</sub>S

Molecular Weight: 383.51369

ALogP: 4.898

Rotatable Bonds: 7

Acceptors: 5

Donors: 3

### Model Prediction

Prediction: 0.0189

Unit: g/kg\_body\_weight

Mahalanobis Distance: 12.3

Mahalanobis Distance p-value: 3.65e-009

Mahalanobis Distance: The Mahalanobis distance (MD) is a generalization of the Euclidean distance that accounts for correlations among the X properties. It is calculated as the distance to the center of the training data. The larger the MD, the less trustworthy the prediction.

Mahalanobis Distance p-value: The p-value gives the fraction of training data with an MD greater than or equal to the one for the given sample, assuming normally distributed data. The smaller the p-value, the less trustworthy the prediction. For highly non-normal X properties (e.g., fingerprints), the MD p-value is wildly inaccurate.

### Structural Similar Compounds

| Name                        | OCHRATOXIN     | SULFISOOXAZOLE | PENICILLIN VK  |
|-----------------------------|----------------|----------------|----------------|
| Structure                   |                |                |                |
| Actual Endpoint (-log C)    | 6.28396        | 2.82494        | 2.54455        |
| Predicted Endpoint (-log C) | 5.12358        | 3.0705         | 3.9702         |
| Distance                    | 0.713          | 0.999          | 1.097          |
| Reference                   | NCI/NTP TR-358 | NCI/NTP TR-138 | NCI/NTP TR-336 |

### Model Applicability

Unknown features are fingerprint features in the query molecule, but not found or appearing too infrequently in the training set.

1. Num\_AromaticRings out of range. Value: 3. Training min, max, mean, SD: 0, 2, 0.5625, 0.693.
2. OPS\_PC9 out of range. Value: -2.7796. Training min, max, SD, explained variance: -2.7086, 2.9267, 1.019, 0.0321.
3. Unknown FCFP\_2 feature: -332197802: [\*][c]1:[\*]:[\*]:[c](:[\*]):n:1:n:[\*]
4. Unknown FCFP\_2 feature: -1564473960: [\*]:n1:[\*]:[\*]:n:[c]:1:[c](:[\*]):[\*]
5. Unknown FCFP\_2 feature: 1294344583: [\*]NN[c](:[\*]):[\*]
6. Unknown FCFP\_2 feature: -1539162406: [\*]C[c]1:n:[\*]:[\*]:n:1:[\*]
7. Unknown FCFP\_2 feature: -885461129: [\*]NNC(=[\*])[\*]
8. Unknown FCFP\_2 feature: 1499521844: [\*]NC(=O)N[\*]

### Feature Contribution

#### Top features for positive contribution

| Fingerprint | Bit/Smiles | Feature Structure | Score |
|-------------|------------|-------------------|-------|
|             |            |                   |       |

|                                               |                   |                                                                                                      |              |
|-----------------------------------------------|-------------------|------------------------------------------------------------------------------------------------------|--------------|
| FCFP_2                                        | 1                 | 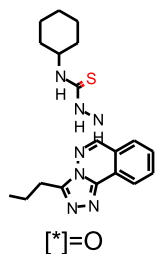<br>[*]=O          | 0.511        |
| FCFP_2                                        | 3                 | <br>[*]N[*]       | 0.104        |
| FCFP_2                                        | -1272798659       | <br>[*]CCC        | 0.0703       |
| <b>Top Features for negative contribution</b> |                   |                                                                                                      |              |
| <b>Fingerprint</b>                            | <b>Bit/Smiles</b> | <b>Feature Structure</b>                                                                             | <b>Score</b> |
| FCFP_2                                        | 136597326         | <br>[*]CC        | -0.489       |
| FCFP_2                                        | 1872154524        | <br>[*]C(=O)[*] | -0.307       |

FCFP\_2

0

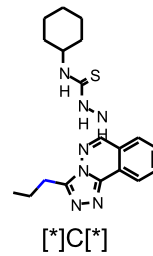

-0.29

9a

TOPKAT\_Rat\_Maximum\_Tolerated\_Dose\_Gavage

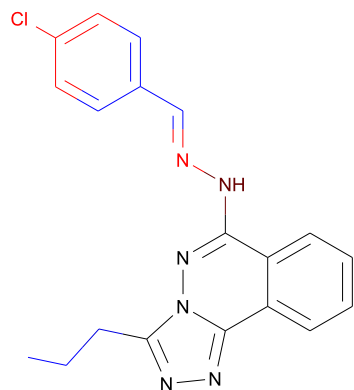

$C_{19}H_{17}ClN_6$   
 Molecular Weight: 364.83147  
 ALogP: 4.967  
 Rotatable Bonds: 5  
 Acceptors: 5  
 Donors: 1

### Model Prediction

Prediction: 0.000411  
 Unit: g/kg\_body\_weight  
 Mahalanobis Distance: 16  
 Mahalanobis Distance p-value: 2.06e-014

Mahalanobis Distance: The Mahalanobis distance (MD) is a generalization of the Euclidean distance that accounts for correlations among the X properties. It is calculated as the distance to the center of the training data. The larger the MD, the less trustworthy the prediction.

Mahalanobis Distance p-value: The p-value gives the fraction of training data with an MD greater than or equal to the one for the given sample, assuming normally distributed data. The smaller the p-value, the less trustworthy the prediction. For highly non-normal X properties (e.g., fingerprints), the MD p-value is wildly inaccurate.

### Structural Similar Compounds

| Name                        | PHENYLBUTAZONE | PROMETHAZINE.HCL | CHLORPHENIRAMINE MALEATE |
|-----------------------------|----------------|------------------|--------------------------|
| Structure                   |                |                  |                          |
| Actual Endpoint (-log C)    | 3.48909        | 3.93152          | 3.96188                  |
| Predicted Endpoint (-log C) | 3.17333        | 4.72433          | 3.83117                  |
| Distance                    | 1.074          | 1.102            | 1.116                    |
| Reference                   | NCI/NTP TR-367 | NCI/NTP TR-425   | NCI/NTP TR-317           |

### Model Applicability

Unknown features are fingerprint features in the query molecule, but not found or appearing too infrequently in the training set.

1. Num\_AromaticRings out of range. Value: 4. Training min, max, mean, SD: 0, 2, 0.5625, 0.693.
2. OPS PC7 out of range. Value: -3.0704. Training min, max, SD, explained variance: -2.8003, 2.9332, 1.16, 0.0416.
3. Unknown FCFP\_2 feature: -332197802: [\*][c]1:[\*]:[\*]:[c](:[\*]):n:1:n:[\*]
4. Unknown FCFP\_2 feature: -1564473960: [\*]:n1:[\*]:[\*]:n:[c]:1:[c](:[\*]):[\*]
5. Unknown FCFP\_2 feature: -1539162406: [\*]C[c]1:n:[\*]:[\*]:n:1:[\*]
6. Unknown FCFP\_2 feature: 1294285001: [\*]=NN[c](:[\*]):[\*]
7. Unknown FCFP\_2 feature: 581019816: [\*]N\N=C\[\*]

### Feature Contribution

#### Top features for positive contribution

| Fingerprint | Bit/Smiles | Feature Structure | Score |
|-------------|------------|-------------------|-------|
|             |            |                   |       |

| FCFP_2                                 | 32         | 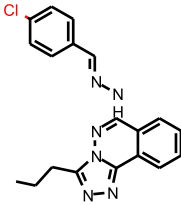<br>[*]Cl                              | 0.526  |
|----------------------------------------|------------|---------------------------------------------------------------------------------------------------------------------------|--------|
| FCFP_2                                 | 1          | <br>[*]=O                              | 0.511  |
| FCFP_2                                 | 367998008  | <br>[*]:[cH]:[c](Cl):[cH]<br>:[*]      | 0.413  |
| Top Features for negative contribution |            |                                                                                                                           |        |
| Fingerprint                            | Bit/Smiles | Feature Structure                                                                                                         | Score  |
| FCFP_2                                 | 136597326  | <br>[*]CC                             | -0.489 |
| FCFP_2                                 | 203677720  | <br>[*]=C[c](:[cH]:[*]):[<br>cH]:[*] | -0.406 |

|        |   |                                                                                                |       |
|--------|---|------------------------------------------------------------------------------------------------|-------|
| FCFP_2 | 0 | 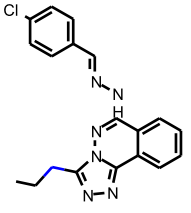<br>[*]C[*] | -0.29 |
|--------|---|------------------------------------------------------------------------------------------------|-------|



9b

TOPKAT\_Rat\_Maximum\_Tolerated\_Dose\_Gavage

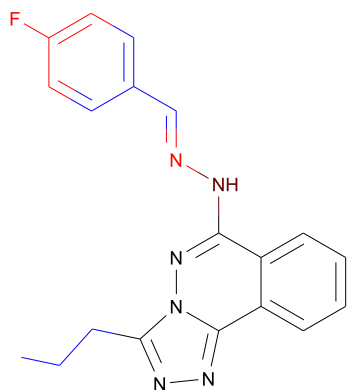

$C_{19}H_{17}FN_6$   
 Molecular Weight: 348.37688  
 ALogP: 4.508  
 Rotatable Bonds: 5  
 Acceptors: 5  
 Donors: 1

### Model Prediction

Prediction: 0.000525  
 Unit: g/kg\_body\_weight  
 Mahalanobis Distance: 16.1  
 Mahalanobis Distance p-value: 1.64e-014

Mahalanobis Distance: The Mahalanobis distance (MD) is a generalization of the Euclidean distance that accounts for correlations among the X properties. It is calculated as the distance to the center of the training data. The larger the MD, the less trustworthy the prediction.

Mahalanobis Distance p-value: The p-value gives the fraction of training data with an MD greater than or equal to the one for the given sample, assuming normally distributed data. The smaller the p-value, the less trustworthy the prediction. For highly non-normal X properties (e.g., fingerprints), the MD p-value is wildly inaccurate.

### Structural Similar Compounds

| Name                        | PHENYLBUTAZONE | PROMETHAZINE.HCL | CHLORPHENIRAMINE MALEATE |
|-----------------------------|----------------|------------------|--------------------------|
| Structure                   |                |                  |                          |
| Actual Endpoint (-log C)    | 3.48909        | 3.93152          | 3.96188                  |
| Predicted Endpoint (-log C) | 3.17333        | 4.72433          | 3.83117                  |
| Distance                    | 1.062          | 1.092            | 1.101                    |
| Reference                   | NCI/NTP TR-367 | NCI/NTP TR-425   | NCI/NTP TR-317           |

### Model Applicability

Unknown features are fingerprint features in the query molecule, but not found or appearing too infrequently in the training set.

1. Num\_AromaticRings out of range. Value: 4. Training min, max, mean, SD: 0, 2, 0.5625, 0.693.
2. OPS\_PC7 out of range. Value: -3.0294. Training min, max, SD, explained variance: -2.8003, 2.9332, 1.16, 0.0416.
3. Unknown FCFP\_2 feature: -332197802: [\*][c]1:[\*]:[\*]:[c](:[\*]):n:1:n:[\*]
4. Unknown FCFP\_2 feature: -1564473960: [\*]:n1:[\*]:[\*]:n:[c]:1:[c](:[\*]):[\*]
5. Unknown FCFP\_2 feature: -1539162406: [\*]C[c]1:n:[\*]:[\*]:n:1:[\*]
6. Unknown FCFP\_2 feature: 1294285001: [\*]=NN[c](:[\*]):[\*]
7. Unknown FCFP\_2 feature: 581019816: [\*]N\N=C\[\*]

### Feature Contribution

#### Top features for positive contribution

| Fingerprint | Bit/Smiles | Feature Structure | Score |
|-------------|------------|-------------------|-------|
|             |            |                   |       |

| FCFP_2                                 | 32         | 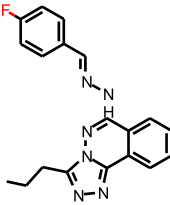<br>[*]Cl                          | 0.526  |
|----------------------------------------|------------|-----------------------------------------------------------------------------------------------------------------------|--------|
| FCFP_2                                 | 1          | <br>[*]=O                          | 0.511  |
| FCFP_2                                 | 367998008  | <br>[*]:[cH]:[c](Cl):[cH]<br>:[*]  | 0.413  |
| Top Features for negative contribution |            |                                                                                                                       |        |
| Fingerprint                            | Bit/Smiles | Feature Structure                                                                                                     | Score  |
| FCFP_2                                 | 136597326  | <br>[*]CC                         | -0.489 |
| FCFP_2                                 | 203677720  | <br>[*]=C[c](:[cH]:[*]):[cH]:[*] | -0.406 |

|        |   |                                                                                                    |       |
|--------|---|----------------------------------------------------------------------------------------------------|-------|
| FCFP_2 | 0 | 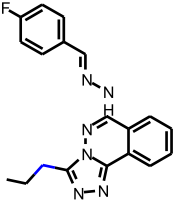 <p>[*]C[*]</p> | -0.29 |
|--------|---|----------------------------------------------------------------------------------------------------|-------|

9c

TOPKAT\_Rat\_Maximum\_Tolerated\_Dose\_Gavage

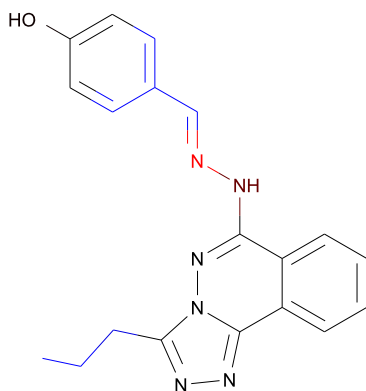C<sub>19</sub>H<sub>18</sub>N<sub>6</sub>O

Molecular Weight: 346.38582

ALogP: 4.061

Rotatable Bonds: 5

Acceptors: 6

Donors: 2

### Model Prediction

Prediction: 0.00197

Unit: g/kg\_body\_weight

Mahalanobis Distance: 19.1

Mahalanobis Distance p-value: 2.18e-018

Mahalanobis Distance: The Mahalanobis distance (MD) is a generalization of the Euclidean distance that accounts for correlations among the X properties. It is calculated as the distance to the center of the training data. The larger the MD, the less trustworthy the prediction.

Mahalanobis Distance p-value: The p-value gives the fraction of training data with an MD greater than or equal to the one for the given sample, assuming normally distributed data. The smaller the p-value, the less trustworthy the prediction. For highly non-normal X properties (e.g., fingerprints), the MD p-value is wildly inaccurate.

### Structural Similar Compounds

| Name                        | OCHRATOXIN     | SULFISOOXAZOLE | PROBENECID     |
|-----------------------------|----------------|----------------|----------------|
| Structure                   |                |                |                |
| Actual Endpoint (-log C)    | 6.28396        | 2.82494        | 2.85333        |
| Predicted Endpoint (-log C) | 5.12358        | 3.0705         | 2.4258         |
| Distance                    | 0.968          | 1.064          | 1.232          |
| Reference                   | NCI/NTP TR-358 | NCI/NTP TR-138 | NCI/NTP TR-395 |

### Model Applicability

Unknown features are fingerprint features in the query molecule, but not found or appearing too infrequently in the training set.

1. Num\_AromaticRings out of range. Value: 4. Training min, max, mean, SD: 0, 2, 0.5625, 0.693.
2. Unknown FCFP\_2 feature: -332197802: [\*][c]1:[\*]:[\*]:[c](:[\*]):n:1:n:[\*]
3. Unknown FCFP\_2 feature: -1564473960: [\*]:n1:[\*]:[\*]:n:[c]:1:[c](:[\*]):[\*]
4. Unknown FCFP\_2 feature: -1539162406: [\*]C[c]1:n:[\*]:[\*]:n:1:[\*]
5. Unknown FCFP\_2 feature: 1294285001: [\*]=NN[c](:[\*]):[\*]
6. Unknown FCFP\_2 feature: 581019816: [\*]N\N=C\[\*]

### Feature Contribution

#### Top features for positive contribution

| Fingerprint | Bit/Smiles | Feature Structure | Score |
|-------------|------------|-------------------|-------|
| FCFP_2      | 1          | <br>[*]=O         | 0.511 |

|                                               |                   |                                                                                                                       |              |
|-----------------------------------------------|-------------------|-----------------------------------------------------------------------------------------------------------------------|--------------|
| FCFP_2                                        | 3                 | 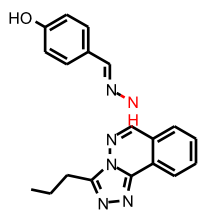<br>[*]N[*]                         | 0.104        |
| FCFP_2                                        | -1272798659       | <br>[*]CCC                         | 0.0703       |
| <b>Top Features for negative contribution</b> |                   |                                                                                                                       |              |
| <b>Fingerprint</b>                            | <b>Bit/Smiles</b> | <b>Feature Structure</b>                                                                                              | <b>Score</b> |
| FCFP_2                                        | 136597326         | <br>[*]CC                          | -0.489       |
| FCFP_2                                        | 203677720         | <br>[*]=C[c](:[cH]:[*]):[cH]:[*] | -0.406       |
| FCFP_2                                        | 0                 | <br>[*]C[*]                      | -0.29        |



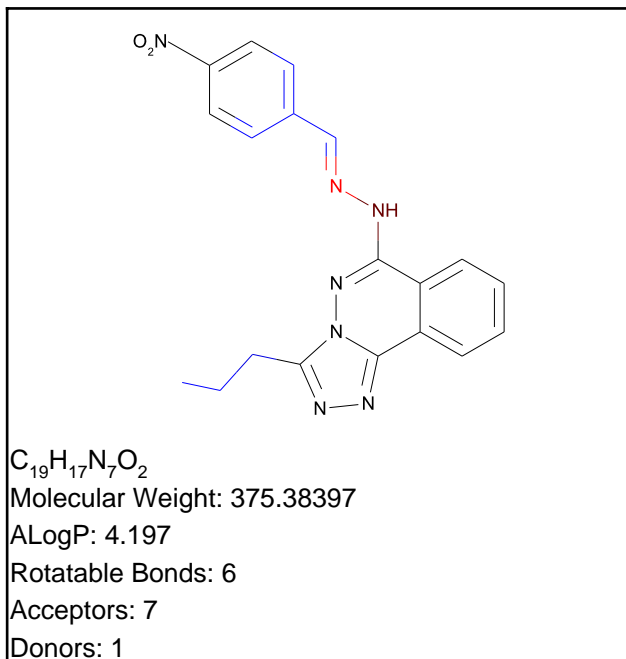

### Model Prediction

Prediction: 0.00156

Unit: g/kg\_body\_weight

Mahalanobis Distance: 17.6

Mahalanobis Distance p-value: 1.56e-016

Mahalanobis Distance: The Mahalanobis distance (MD) is a generalization of the Euclidean distance that accounts for correlations among the X properties. It is calculated as the distance to the center of the training data. The larger the MD, the less trustworthy the prediction.

Mahalanobis Distance p-value: The p-value gives the fraction of training data with an MD greater than or equal to the one for the given sample, assuming normally distributed data. The smaller the p-value, the less trustworthy the prediction. For highly non-normal X properties (e.g., fingerprints), the MD p-value is wildly inaccurate.

### Structural Similar Compounds

| Name                        | OCHRATOXIN                                                                          | SULFISOOXAZOLE                                                                      | PROBENECID                                                                          |
|-----------------------------|-------------------------------------------------------------------------------------|-------------------------------------------------------------------------------------|-------------------------------------------------------------------------------------|
| Structure                   | 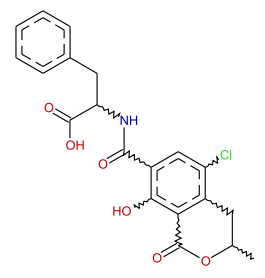 |  |  |
| Actual Endpoint (-log C)    | 6.28396                                                                             | 2.82494                                                                             | 2.85333                                                                             |
| Predicted Endpoint (-log C) | 5.12358                                                                             | 3.0705                                                                              | 2.4258                                                                              |
| Distance                    | 1.096                                                                               | 1.156                                                                               | 1.294                                                                               |
| Reference                   | NCI/NTP TR-358                                                                      | NCI/NTP TR-138                                                                      | NCI/NTP TR-395                                                                      |

### Model Applicability

Unknown features are fingerprint features in the query molecule, but not found or appearing too infrequently in the training set.

1. Num\_H\_Acceptors out of range. Value: 7. Training min, max, mean, SD: 0, 6, 1.6146, 1.644.
2. Num\_AromaticRings out of range. Value: 4. Training min, max, mean, SD: 0, 2, 0.5625, 0.693.
3. OPS\_PC6 out of range. Value: -2.6439. Training min, max, SD, explained variance: -2.4321, 2.9885, 1.256, 0.0488.
4. Unknown FCFP\_2 feature: 8: [\*][N+](=[\*])[\*]
5. Unknown FCFP\_2 feature: 5: [\*][O-]
6. Unknown FCFP\_2 feature: -332197802: [\*][c]1:[\*]:[\*]:[c](:[\*]):n:1:n:[\*]
7. Unknown FCFP\_2 feature: -1564473960: [\*]:n1:[\*]:[\*]:n:[c]:1:[c](:[\*]):[\*]
8. Unknown FCFP\_2 feature: -1539162406: [\*]C[c]1:n:[\*]:[\*]:n:1:[\*]
9. Unknown FCFP\_2 feature: 1294285001: [\*]=NN[c](:[\*]):[\*]
10. Unknown FCFP\_2 feature: 581019816: [\*]N\N=C\[\*]
11. Unknown FCFP\_2 feature: -828984032: [\*][N+](=[\*])[c](:[cH]:[\*]):[cH]:[\*]
12. Unknown FCFP\_2 feature: -1338588315: [\*]:[c](:[\*])[N+](=O)[O-]
13. Unknown FCFP\_2 feature: 1872392852: [\*][N+](=O)[\*]
14. Unknown FCFP\_2 feature: 260476081: [\*][N+](=[\*])[O-]

### Feature Contribution

#### Top features for positive contribution

| Fingerprint | Bit/Smiles | Feature Structure | Score |
|-------------|------------|-------------------|-------|
|-------------|------------|-------------------|-------|

|                                               |                   |                                                                                                                       |              |
|-----------------------------------------------|-------------------|-----------------------------------------------------------------------------------------------------------------------|--------------|
| FCFP_2                                        | 1                 | 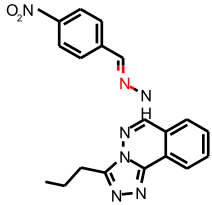<br>[*]=O                          | 0.511        |
| FCFP_2                                        | 3                 | <br>[*]N[*]                        | 0.104        |
| FCFP_2                                        | -1272798659       | <br>[*]CCC                         | 0.0703       |
| <b>Top Features for negative contribution</b> |                   |                                                                                                                       |              |
| <b>Fingerprint</b>                            | <b>Bit/Smiles</b> | <b>Feature Structure</b>                                                                                              | <b>Score</b> |
| FCFP_2                                        | 136597326         | <br>[*]CC                         | -0.489       |
| FCFP_2                                        | 203677720         | <br>[*]=C[c](:[cH]:[*]):[cH]:[*] | -0.406       |



|        |   |                                                                                                |       |
|--------|---|------------------------------------------------------------------------------------------------|-------|
| FCFP_2 | 0 | 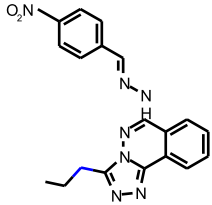<br>[*]C[*] | -0.29 |
|--------|---|------------------------------------------------------------------------------------------------|-------|

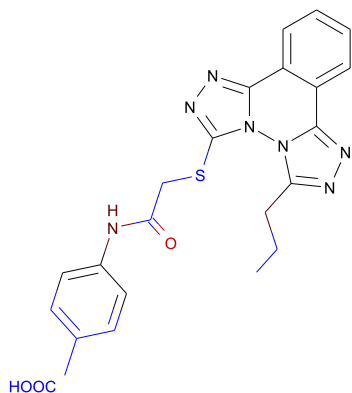

$C_{22}H_{19}N_7O_3S$

Molecular Weight: 461.49635

ALogP: 3.42

Rotatable Bonds: 7

Acceptors: 8

Donors: 2

### Model Prediction

Prediction: 0.00596

Unit: g/kg\_body\_weight

Mahalanobis Distance: 18.3

Mahalanobis Distance p-value: 2.45e-017

Mahalanobis Distance: The Mahalanobis distance (MD) is a generalization of the Euclidean distance that accounts for correlations among the X properties. It is calculated as the distance to the center of the training data. The larger the MD, the less trustworthy the prediction.

Mahalanobis Distance p-value: The p-value gives the fraction of training data with an MD greater than or equal to the one for the given sample, assuming normally distributed data. The smaller the p-value, the less trustworthy the prediction. For highly non-normal X properties (e.g., fingerprints), the MD p-value is wildly inaccurate.

### Structural Similar Compounds

| Name                        | OCHRATOXIN     | SULFISOOXAZOLE | PENICILLIN VK  |
|-----------------------------|----------------|----------------|----------------|
| Structure                   |                |                |                |
| Actual Endpoint (-log C)    | 6.28396        | 2.82494        | 2.54455        |
| Predicted Endpoint (-log C) | 5.12358        | 3.0705         | 3.9702         |
| Distance                    | 1.228          | 1.392          | 1.462          |
| Reference                   | NCI/NTP TR-358 | NCI/NTP TR-138 | NCI/NTP TR-336 |

### Model Applicability

Unknown features are fingerprint features in the query molecule, but not found or appearing too infrequently in the training set.

1. Molecular\_Weight out of range. Value: 461.5. Training min, max, mean, SD: 68.074, 434.63, 171.13, 85.06.
2. Num\_H\_Acceptors out of range. Value: 8. Training min, max, mean, SD: 0, 6, 1.6146, 1.644.
3. Num\_AromaticRings out of range. Value: 5. Training min, max, mean, SD: 0, 2, 0.5625, 0.693.
4. Molecular\_PolarSurfaceArea out of range. Value: 152.07. Training min, max, mean, SD: 0, 138.03, 28.978, 32.1.
5. OPS PC1 out of range. Value: 8.6119. Training min, max, SD, explained variance: -4.0008, 7.9165, 2.861, 0.2531.
6. Unknown FCFP\_2 feature: -1539162406: [\*]C[c]1:n:[\*]:[\*]:n:1:[\*]
7. Unknown FCFP\_2 feature: -1564473960: [\*]:n1:[\*]:[\*]:n:[c]:1:[c](:[\*]):[\*]
8. Unknown FCFP\_2 feature: -332197802: [\*][c]1:[\*]:[\*]:[c](:[\*]):n:1:n:[\*]

### Feature Contribution

#### Top features for positive contribution

| Fingerprint | Bit/Smiles | Feature Structure | Score |
|-------------|------------|-------------------|-------|
|             |            |                   |       |

|                                               |                   |                                                                                       |              |
|-----------------------------------------------|-------------------|---------------------------------------------------------------------------------------|--------------|
| FCFP_2                                        | 1                 | 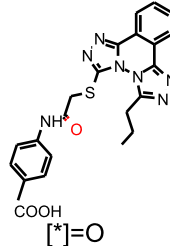   | 0.511        |
| FCFP_2                                        | 3                 |    | 0.104        |
| FCFP_2                                        | -1272798659       |    | 0.0703       |
| <b>Top Features for negative contribution</b> |                   |                                                                                       |              |
| <b>Fingerprint</b>                            | <b>Bit/Smiles</b> | <b>Feature Structure</b>                                                              | <b>Score</b> |
| FCFP_2                                        | 136597326         |   | -0.489       |
| FCFP_2                                        | 203677720         |  | -0.406       |

|        |            |                                                                                                                 |        |
|--------|------------|-----------------------------------------------------------------------------------------------------------------|--------|
| FCFP_2 | 1872154524 | 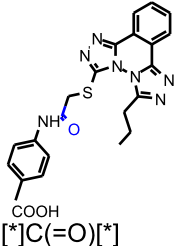 <p>COOH<br/>[*]C(=O)[*]</p> | -0.307 |
|--------|------------|-----------------------------------------------------------------------------------------------------------------|--------|

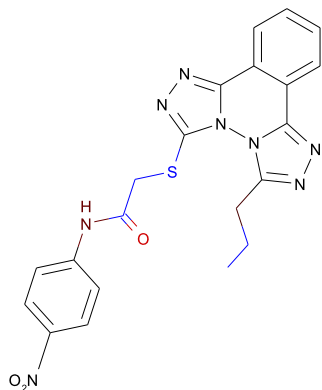

$C_{21}H_{18}N_8O_3S$

Molecular Weight: 462.48441

ALogP: 3.685

Rotatable Bonds: 7

Acceptors: 8

Donors: 1

### Model Prediction

Prediction: 0.00306

Unit: g/kg\_body\_weight

Mahalanobis Distance: 18.8

Mahalanobis Distance p-value: 4.78e-018

Mahalanobis Distance: The Mahalanobis distance (MD) is a generalization of the Euclidean distance that accounts for correlations among the X properties. It is calculated as the distance to the center of the training data. The larger the MD, the less trustworthy the prediction.

Mahalanobis Distance p-value: The p-value gives the fraction of training data with an MD greater than or equal to the one for the given sample, assuming normally distributed data. The smaller the p-value, the less trustworthy the prediction. For highly non-normal X properties (e.g., fingerprints), the MD p-value is wildly inaccurate.

### Structural Similar Compounds

| Name                        | OCHRATOXIN     | SULFISOOXAZOLE | PENICILLIN VK  |
|-----------------------------|----------------|----------------|----------------|
| Structure                   |                |                |                |
| Actual Endpoint (-log C)    | 6.28396        | 2.82494        | 2.54455        |
| Predicted Endpoint (-log C) | 5.12358        | 3.0705         | 3.9702         |
| Distance                    | 1.372          | 1.468          | 1.544          |
| Reference                   | NCI/NTP TR-358 | NCI/NTP TR-138 | NCI/NTP TR-336 |

### Model Applicability

Unknown features are fingerprint features in the query molecule, but not found or appearing too infrequently in the training set.

1. Molecular\_Weight out of range. Value: 462.48. Training min, max, mean, SD: 68.074, 434.63, 171.13, 85.06.
2. Num\_H\_Acceptors out of range. Value: 8. Training min, max, mean, SD: 0, 6, 1.6146, 1.644.
3. Num\_AromaticRings out of range. Value: 5. Training min, max, mean, SD: 0, 2, 0.5625, 0.693.
4. Molecular\_PolarSurfaceArea out of range. Value: 160.6. Training min, max, mean, SD: 0, 138.03, 28.978, 32.1.
5. OPS\_PC9 out of range. Value: -2.7709. Training min, max, SD, explained variance: -2.7086, 2.9267, 1.019, 0.0321.
6. Unknown FCFP\_2 feature: 8: [\*][N+](=\*)[\*]
7. Unknown FCFP\_2 feature: 5: [\*][O-]
8. Unknown FCFP\_2 feature: -1539162406: [\*]C[c]1:n:[\*]:[\*]:n:1:[\*]
9. Unknown FCFP\_2 feature: -1564473960: [\*]:n1:[\*]:[\*]:n:[c]:1:[c](:[\*]):[\*]
10. Unknown FCFP\_2 feature: -332197802: [\*][c]1:[\*]:[\*]:[c](:[\*]):n:1:n:[\*]
11. Unknown FCFP\_2 feature: -828984032: [\*][N+](=\*)[c](:[cH]:[\*]):[cH]:[\*]
12. Unknown FCFP\_2 feature: -1338588315: [\*]:[c](:[\*])[N+](=O)[O-]
13. Unknown FCFP\_2 feature: 1872392852: [\*][N+](=O)[\*]
14. Unknown FCFP\_2 feature: 260476081: [\*][N+](=\*)[O-]

### Feature Contribution

Top features for positive contribution

| Fingerprint                                   | Bit/Smiles  | Feature Structure                                                                                           | Score  |
|-----------------------------------------------|-------------|-------------------------------------------------------------------------------------------------------------|--------|
| FCFP_2                                        | 1           | 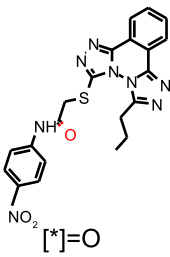<br><chem>[*]=O</chem>   | 0.511  |
| FCFP_2                                        | 3           | <br><chem>[*]N[*]</chem> | 0.104  |
| FCFP_2                                        | -1272798659 | <br><chem>[*]CCC</chem>  | 0.0703 |
| <b>Top Features for negative contribution</b> |             |                                                                                                             |        |
| Fingerprint                                   | Bit/Smiles  | Feature Structure                                                                                           | Score  |
| FCFP_2                                        | 136597326   | <br><chem>[*]CC</chem> | -0.489 |

|        |            |                                                                                                                                      |        |
|--------|------------|--------------------------------------------------------------------------------------------------------------------------------------|--------|
| FCFP_2 | 1872154524 | 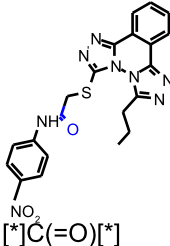 <p data-bbox="1423 324 1543 349">[*]C(=O)[*]</p> | -0.307 |
| FCFP_2 | 0          |  <p data-bbox="1423 592 1522 617">[*]C[*]</p>     | -0.29  |

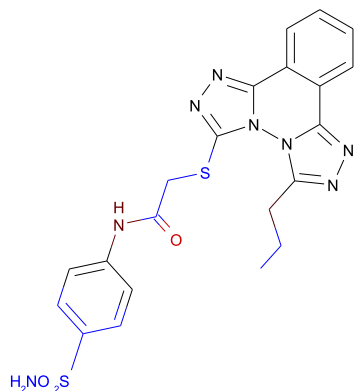

$C_{21}H_{20}N_8O_3S_2$   
 Molecular Weight: 496.56529  
 ALogP: 2.496  
 Rotatable Bonds: 7  
 Acceptors: 8  
 Donors: 2

### Model Prediction

Prediction: 0.0275  
 Unit: g/kg\_body\_weight  
 Mahalanobis Distance: 16  
 Mahalanobis Distance p-value: 2.39e-014

Mahalanobis Distance: The Mahalanobis distance (MD) is a generalization of the Euclidean distance that accounts for correlations among the X properties. It is calculated as the distance to the center of the training data. The larger the MD, the less trustworthy the prediction.

Mahalanobis Distance p-value: The p-value gives the fraction of training data with an MD greater than or equal to the one for the given sample, assuming normally distributed data. The smaller the p-value, the less trustworthy the prediction. For highly non-normal X properties (e.g., fingerprints), the MD p-value is wildly inaccurate.

### Structural Similar Compounds

| Name                        | OCHRATOXIN     | SULFISOOXAZOLE | PENICILLIN VK  |
|-----------------------------|----------------|----------------|----------------|
| Structure                   |                |                |                |
| Actual Endpoint (-log C)    | 6.28396        | 2.82494        | 2.54455        |
| Predicted Endpoint (-log C) | 5.12358        | 3.0705         | 3.9702         |
| Distance                    | 1.363          | 1.453          | 1.562          |
| Reference                   | NCI/NTP TR-358 | NCI/NTP TR-138 | NCI/NTP TR-336 |

### Model Applicability

Unknown features are fingerprint features in the query molecule, but not found or appearing too infrequently in the training set.

- Molecular\_Weight out of range. Value: 496.57. Training min, max, mean, SD: 68.074, 434.63, 171.13, 85.06.
- Num\_H\_Acceptors out of range. Value: 8. Training min, max, mean, SD: 0, 6, 1.6146, 1.644.
- Num\_AromaticRings out of range. Value: 5. Training min, max, mean, SD: 0, 2, 0.5625, 0.693.
- Molecular\_PolarSASA out of range. Value: 269.26. Training min, max, mean, SD: 0, 223.97, 50.816, 55.15.
- Molecular\_PolarSurfaceArea out of range. Value: 183.32. Training min, max, mean, SD: 0, 138.03, 28.978, 32.1.
- OPS PC1 out of range. Value: 8.7116. Training min, max, SD, explained variance: -4.0008, 7.9165, 2.861, 0.2531.
- OPS PC6 out of range. Value: -2.4899. Training min, max, SD, explained variance: -2.4321, 2.9885, 1.256, 0.0488.
- OPS PC9 out of range. Value: -3.1064. Training min, max, SD, explained variance: -2.7086, 2.9267, 1.019, 0.0321.
- Unknown FCFP\_2 feature: -1539162406: [\*]C[c]1:n:[\*]:[\*]:n:1:[\*]
- Unknown FCFP\_2 feature: -1564473960: [\*]:n:1:[\*]:[\*]:n:[c]:1:[c](:[\*]):[\*]
- Unknown FCFP\_2 feature: -332197802: [\*][c]1:[\*]:[\*]:[c](:[\*]):n:1:n:[\*]

### Feature Contribution

Top features for positive contribution



| Fingerprint                                   | Bit/Smiles  | Feature Structure                                                                     | Score  |
|-----------------------------------------------|-------------|---------------------------------------------------------------------------------------|--------|
| FCFP_2                                        | 1           | 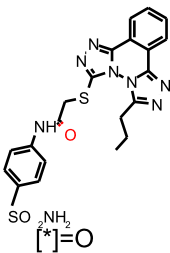   | 0.511  |
| FCFP_2                                        | 3           |    | 0.104  |
| FCFP_2                                        | -1272798659 |    | 0.0703 |
| <b>Top Features for negative contribution</b> |             |                                                                                       |        |
| Fingerprint                                   | Bit/Smiles  | Feature Structure                                                                     | Score  |
| FCFP_2                                        | 136597326   |  | -0.489 |

|        |            |                                                                                                                                                  |        |
|--------|------------|--------------------------------------------------------------------------------------------------------------------------------------------------|--------|
| FCFP_2 | 203677720  | 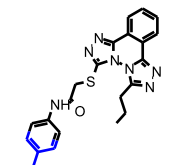<br><chem>[*]C(=O)c1ccc(cc1)NCC2=CN3C(=N)C(=N)C=C3N2</chem>   | -0.406 |
| FCFP_2 | 1872154524 | <br><chem>NS(=O)(=O)c1ccc(cc1)NCC2=CN3C(=N)C(=N)C=C3N2</chem> | -0.307 |

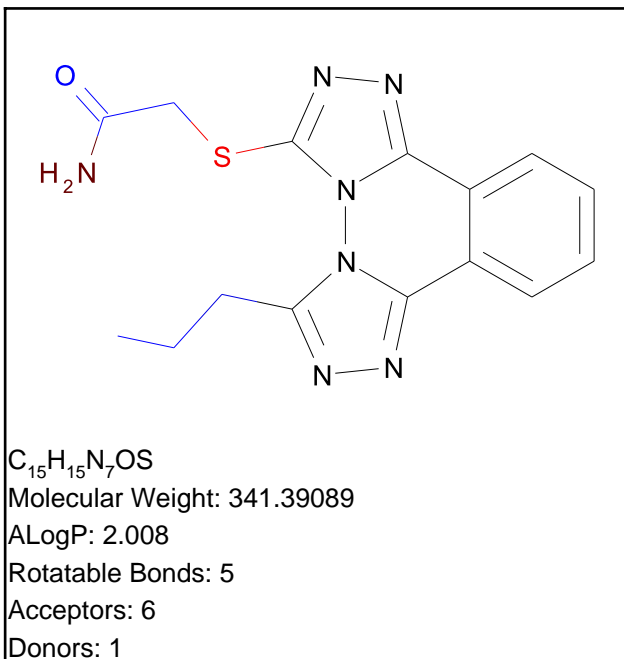

### Model Prediction

Prediction: 0.0362

Unit: g/kg\_body\_weight

Mahalanobis Distance: 15

Mahalanobis Distance p-value: 5.46e-013

Mahalanobis Distance: The Mahalanobis distance (MD) is a generalization of the Euclidean distance that accounts for correlations among the X properties. It is calculated as the distance to the center of the training data. The larger the MD, the less trustworthy the prediction.

Mahalanobis Distance p-value: The p-value gives the fraction of training data with an MD greater than or equal to the one for the given sample, assuming normally distributed data. The smaller the p-value, the less trustworthy the prediction. For highly non-normal X properties (e.g., fingerprints), the MD p-value is wildly inaccurate.

### Structural Similar Compounds

| Name                        | SULFISOOXAZOLE                                                                      | OCHRATOXIN                                                                          | PENICILLIN VK                                                                       |
|-----------------------------|-------------------------------------------------------------------------------------|-------------------------------------------------------------------------------------|-------------------------------------------------------------------------------------|
| Structure                   | 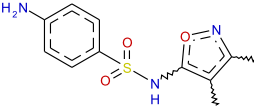 |  |  |
| Actual Endpoint (-log C)    | 2.82494                                                                             | 6.28396                                                                             | 2.54455                                                                             |
| Predicted Endpoint (-log C) | 3.0705                                                                              | 5.12358                                                                             | 3.9702                                                                              |
| Distance                    | 1.009                                                                               | 1.086                                                                               | 1.153                                                                               |
| Reference                   | NCI/NTP TR-138                                                                      | NCI/NTP TR-358                                                                      | NCI/NTP TR-336                                                                      |

### Model Applicability

Unknown features are fingerprint features in the query molecule, but not found or appearing too infrequently in the training set.

1. Num\_AromaticRings out of range. Value: 4. Training min, max, mean, SD: 0, 2, 0.5625, 0.693.
2. Unknown FCFP\_2 feature: -1564473960: [\*]:n1:[\*]:[\*]:n:[c]:1:[c](:[\*]):[\*]
3. Unknown FCFP\_2 feature: -332197802: [\*][c]1:[\*]:[\*]:[c](:[\*]):n:1:n:[\*]
4. Unknown FCFP\_2 feature: -1539162406: [\*]C[c]1:n:[\*]:[\*]:n:1:[\*]

### Feature Contribution

#### Top features for positive contribution

| Fingerprint | Bit/Smiles | Feature Structure                                                                              | Score |
|-------------|------------|------------------------------------------------------------------------------------------------|-------|
| FCFP_2      | 1          | 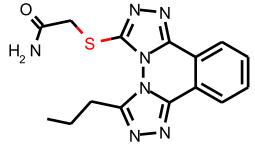<br>[*]=O | 0.511 |

|                                               |                   |                                                                                                      |              |
|-----------------------------------------------|-------------------|------------------------------------------------------------------------------------------------------|--------------|
| FCFP_2                                        | 3                 | 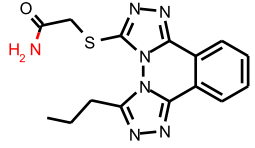<br>[*]N[*]       | 0.104        |
| FCFP_2                                        | -1272798659       | <br>[*]CCC        | 0.0703       |
| <b>Top Features for negative contribution</b> |                   |                                                                                                      |              |
| <b>Fingerprint</b>                            | <b>Bit/Smiles</b> | <b>Feature Structure</b>                                                                             | <b>Score</b> |
| FCFP_2                                        | 136597326         | <br>[*]CC         | -0.489       |
| FCFP_2                                        | 1872154524        | <br>[*]C(=O)[*] | -0.307       |
| FCFP_2                                        | 0                 | <br>[*]C[*]     | -0.29        |



# Doxorubicin

# TOPKAT\_Rat\_Maximum\_Tolerated\_Dose\_Gavage

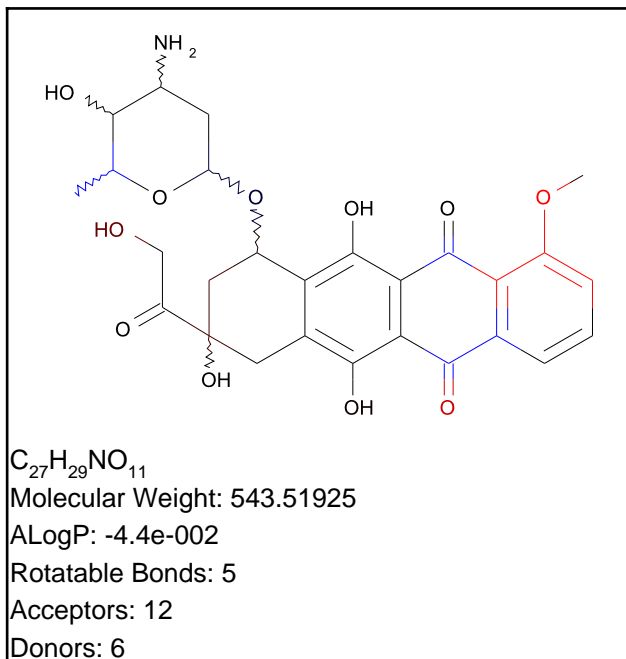

## Model Prediction

Prediction: 4.1e-005

Unit: g/kg\_body\_weight

Mahalanobis Distance: 18.3

Mahalanobis Distance p-value: 1.97e-017

Mahalanobis Distance: The Mahalanobis distance (MD) is a generalization of the Euclidean distance that accounts for correlations among the X properties. It is calculated as the distance to the center of the training data. The larger the MD, the less trustworthy the prediction.

Mahalanobis Distance p-value: The p-value gives the fraction of training data with an MD greater than or equal to the one for the given sample, assuming normally distributed data. The smaller the p-value, the less trustworthy the prediction. For highly non-normal X properties (e.g., fingerprints), the MD p-value is wildly inaccurate.

## Structural Similar Compounds

| Name                        | AMPICILLIN TRIHYDRATE                                                               | OCHRATOXIN                                                                          | PENICILLIN VK                                                                       |
|-----------------------------|-------------------------------------------------------------------------------------|-------------------------------------------------------------------------------------|-------------------------------------------------------------------------------------|
| Structure                   | 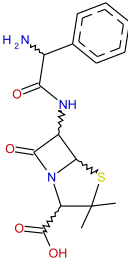 |  |  |
| Actual Endpoint (-log C)    | 2.36724                                                                             | 6.28396                                                                             | 2.54455                                                                             |
| Predicted Endpoint (-log C) | 2.27651                                                                             | 5.12358                                                                             | 3.9702                                                                              |
| Distance                    | 1.486                                                                               | 1.531                                                                               | 1.674                                                                               |
| Reference                   | NCI/NTP TR-318                                                                      | NCI/NTP TR-358                                                                      | NCI/NTP TR-336                                                                      |

## Model Applicability

Unknown features are fingerprint features in the query molecule, but not found or appearing too infrequently in the training set.

- Molecular\_Weight out of range. Value: 543.52. Training min, max, mean, SD: 68.074, 434.63, 171.13, 85.06.
- Num\_H\_Donors out of range. Value: 6. Training min, max, mean, SD: 0, 3, 0.4375, 0.8311.
- Num\_H\_Acceptors out of range. Value: 12. Training min, max, mean, SD: 0, 6, 1.6146, 1.644.
- Molecular\_PolarSASA out of range. Value: 345.3. Training min, max, mean, SD: 0, 223.97, 50.816, 55.15.
- Molecular\_PolarSurfaceArea out of range. Value: 206.07. Training min, max, mean, SD: 0, 138.03, 28.978, 32.1.
- OPS\_PC1 out of range. Value: 12.738. Training min, max, SD, explained variance: -4.0008, 7.9165, 2.861, 0.2531.
- Unknown FCFP\_2 feature: -1549669478: [\*]:[c](:[\*])C(=O)[c](:[\*]):[\*]
- Unknown FCFP\_2 feature: -415156552: [\*]CC(O)(C[\*])C(=[\*])[\*]

## Feature Contribution

### Top features for positive contribution

| Fingerprint | Bit/Smiles | Feature Structure | Score |
|-------------|------------|-------------------|-------|
|             |            |                   |       |

|                                               |                   |                                                                                                                                     |              |
|-----------------------------------------------|-------------------|-------------------------------------------------------------------------------------------------------------------------------------|--------------|
| FCFP_2                                        | 332760439         | 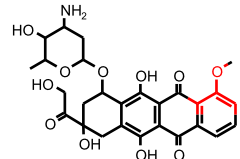<br><chem>[*]O[c](:[cH]:[*]):[c]([*]):[*]</chem> | 0.672        |
| FCFP_2                                        | 1                 | <br><chem>[*]=O</chem>                           | 0.511        |
| FCFP_2                                        | 3                 | <br><chem>[*]N[*]</chem>                         | 0.104        |
| <b>Top Features for negative contribution</b> |                   |                                                                                                                                     |              |
| <b>Fingerprint</b>                            | <b>Bit/Smiles</b> | <b>Feature Structure</b>                                                                                                            | <b>Score</b> |
| FCFP_2                                        | 136597326         | <br><chem>[*]CC</chem>                         | -0.489       |
| FCFP_2                                        | 203677720         | <br><chem>[*]=C[c](:[cH]:[*]):[cH]:[*]</chem>  | -0.406       |

|        |            |                                                                                                                                      |        |
|--------|------------|--------------------------------------------------------------------------------------------------------------------------------------|--------|
| FCFP_2 | 1872154524 | 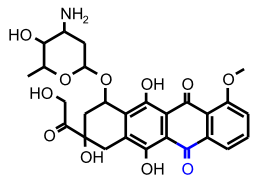 <p data-bbox="1430 315 1556 344">[*]C(=O)[*]</p> | -0.307 |
|--------|------------|--------------------------------------------------------------------------------------------------------------------------------------|--------|



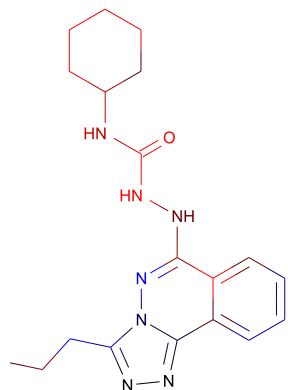

$C_{19}H_{25}N_7O$

Molecular Weight: 367.44809

ALogP: 3.681

Rotatable Bonds: 5

Acceptors: 5

Donors: 3

### Model Prediction

Prediction: 0.861

Unit: g/kg\_body\_weight

Mahalanobis Distance: 27.2

Mahalanobis Distance p-value: 1.37e-044

Mahalanobis Distance: The Mahalanobis distance (MD) is a generalization of the Euclidean distance that accounts for correlations among the X properties. It is calculated as the distance to the center of the training data. The larger the MD, the less trustworthy the prediction.

Mahalanobis Distance p-value: The p-value gives the fraction of training data with an MD greater than or equal to the one for the given sample, assuming normally distributed data. The smaller the p-value, the less trustworthy the prediction. For highly non-normal X properties (e.g., fingerprints), the MD p-value is wildly inaccurate.

### Structural Similar Compounds

| Name                        | FLUBENDAZOLE   | CARBAMIC ACID; N-(5-BENZOYLBENZIMIDAZOL-2-YL)-; METHYL ESTER | METHYL-1-(BUTYLCARBAMOYL)-2-BENZIMIDAZOLE CARBAMATE |
|-----------------------------|----------------|--------------------------------------------------------------|-----------------------------------------------------|
| Structure                   |                |                                                              |                                                     |
| Actual Endpoint (-log C)    | 2.088          | 2.617                                                        | 1.463                                               |
| Predicted Endpoint (-log C) | 2.69288        | 2.2368                                                       | 1.78491                                             |
| Distance                    | 0.641          | 0.651                                                        | 0.701                                               |
| Reference                   | YRTMA6 9;11;78 | IYKEDH 19;735;88                                             | JHEMA2 24;295;80                                    |

### Model Applicability

Unknown features are fingerprint features in the query molecule, but not found or appearing too infrequently in the training set.

1. All properties and OPS components are within expected ranges.
2. Unknown FCFP\_6 feature: 16: [\*]:[cH]:[\*]
3. Unknown FCFP\_6 feature: 1618154665: [\*]:[cH]:[cH]:[cH]:[\*]
4. Unknown FCFP\_6 feature: -1151884458: [\*]N[c](:n:[\*]):[c](:[\*]):[\*]
5. Unknown FCFP\_6 feature: 4427049: [\*][c](:[\*]):n:n(:[\*]):[\*]
6. Unknown FCFP\_6 feature: -332197802: [\*][c]1:[\*]:[\*]:[c](:[\*]):n:1:n:[\*]
7. Unknown FCFP\_6 feature: -1564473960: [\*]:n1:[\*]:[\*]:n:[c]:1:[c](:[\*]):[\*]
8. Unknown FCFP\_6 feature: 1294344583: [\*]NN[c](:[\*]):[\*]
9. Unknown FCFP\_6 feature: -1539162406: [\*]C[c]1:n:[\*]:[\*]:n:1:[\*]
10. Unknown FCFP\_6 feature: -885461129: [\*]NNC(=[\*])[\*]

### Feature Contribution

#### Top features for positive contribution

| Fingerprint | Bit/Smiles | Feature Structure | Score |
|-------------|------------|-------------------|-------|
|             |            |                   |       |

|                                               |                   |                                                                                                         |              |
|-----------------------------------------------|-------------------|---------------------------------------------------------------------------------------------------------|--------------|
| ECFP_6                                        | 642810091         | 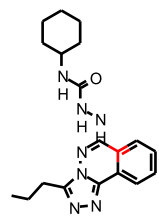<br>[*]:[c](:[*]):[*] | 0.281        |
| FCFP_6                                        | 1499521844        | <br>[*]NC(=O)N[*]    | 0.258        |
| ECFP_6                                        | -1897341097       | <br>[*]N[*]          | 0.216        |
| <b>Top Features for negative contribution</b> |                   |                                                                                                         |              |
| <b>Fingerprint</b>                            | <b>Bit/Smiles</b> | <b>Feature Structure</b>                                                                                | <b>Score</b> |
| ECFP_6                                        | 655739385         | <br>[*]:n:[*]       | -0.239       |
| ECFP_6                                        | 734603939         | <br>[*]C           | -0.201       |

ECFP\_6

-1795525632

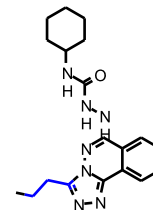

[\*]CC[c](:[\*]):[\*]

-0.176

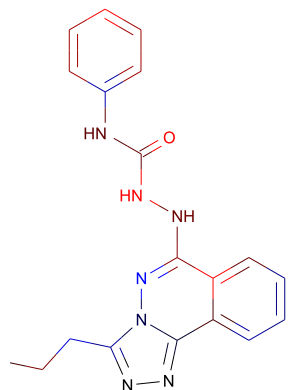

$C_{19}H_{19}N_7O$

Molecular Weight: 361.40046

ALogP: 3.399

Rotatable Bonds: 5

Acceptors: 5

Donors: 3

### Model Prediction

Prediction: 2.51

Unit: g/kg\_body\_weight

Mahalanobis Distance: 27.5

Mahalanobis Distance p-value: 2.14e-046

Mahalanobis Distance: The Mahalanobis distance (MD) is a generalization of the Euclidean distance that accounts for correlations among the X properties. It is calculated as the distance to the center of the training data. The larger the MD, the less trustworthy the prediction.

Mahalanobis Distance p-value: The p-value gives the fraction of training data with an MD greater than or equal to the one for the given sample, assuming normally distributed data. The smaller the p-value, the less trustworthy the prediction. For highly non-normal X properties (e.g., fingerprints), the MD p-value is wildly inaccurate.

### Structural Similar Compounds

| Name                        | CARBAMIC ACID; N-(5-BENZOYL BENZIMIDAZOL-2-YL)-; METHYL ESTER | FLUBENDAZOLE   | SULFAQUINOXALINE |
|-----------------------------|---------------------------------------------------------------|----------------|------------------|
| Structure                   |                                                               |                |                  |
| Actual Endpoint (-log C)    | 2.617                                                         | 2.088          | 2.341            |
| Predicted Endpoint (-log C) | 2.2368                                                        | 2.69288        | 2.42674          |
| Distance                    | 0.705                                                         | 0.709          | 0.785            |
| Reference                   | IYKEDH 19;735;88                                              | YRTMA6 9;11;78 | MahWM# 16NOV82   |

### Model Applicability

Unknown features are fingerprint features in the query molecule, but not found or appearing too infrequently in the training set.

1. All properties and OPS components are within expected ranges.
2. Unknown FCFP\_6 feature: 16: [\*]:[cH]:[\*]
3. Unknown FCFP\_6 feature: 1618154665: [\*]:[cH]:[cH]:[cH]:[\*]
4. Unknown FCFP\_6 feature: -1151884458: [\*]N[c](:n:[\*]):[c](:[\*]):[\*]
5. Unknown FCFP\_6 feature: 4427049: [\*][c](:[\*]):n:n(:[\*]):[\*]
6. Unknown FCFP\_6 feature: -332197802: [\*][c]1:[\*]:[\*]:[c](:[\*]):n:1:n:[\*]
7. Unknown FCFP\_6 feature: -1564473960: [\*]:n1:[\*]:[\*]:n:[c]:1:[c](:[\*]):[\*]
8. Unknown FCFP\_6 feature: 1294344583: [\*]NN[c](:[\*]):[\*]
9. Unknown FCFP\_6 feature: -1539162406: [\*]C[c]1:n:[\*]:[\*]:n:1:[\*]
10. Unknown FCFP\_6 feature: -885461129: [\*]NNC(=[\*])[\*]

### Feature Contribution

#### Top features for positive contribution

| Fingerprint | Bit/Smiles | Feature Structure | Score |
|-------------|------------|-------------------|-------|
|             |            |                   |       |

|                                               |                   |                                                                                                         |              |
|-----------------------------------------------|-------------------|---------------------------------------------------------------------------------------------------------|--------------|
| ECFP_6                                        | 642810091         | 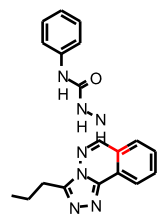<br>[*]:[c](:[*]):[*] | 0.281        |
| FCFP_6                                        | 1499521844        | <br>[*]NC(=O)N[*]    | 0.258        |
| ECFP_6                                        | 1897341097        | <br>[*]N[*]          | 0.216        |
| <b>Top Features for negative contribution</b> |                   |                                                                                                         |              |
| <b>Fingerprint</b>                            | <b>Bit/Smiles</b> | <b>Feature Structure</b>                                                                                | <b>Score</b> |
| ECFP_6                                        | 655739385         | <br>[*]:n:[*]       | -0.239       |
| ECFP_6                                        | 734603939         | <br>[*]C           | -0.201       |

|        |            |                                                                                                         |       |
|--------|------------|---------------------------------------------------------------------------------------------------------|-------|
| ECFP_6 | 1795525632 | 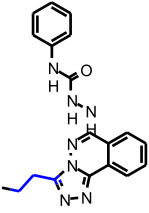<br>[*]CC[c]:[*]:[*] | 0.176 |
|--------|------------|---------------------------------------------------------------------------------------------------------|-------|

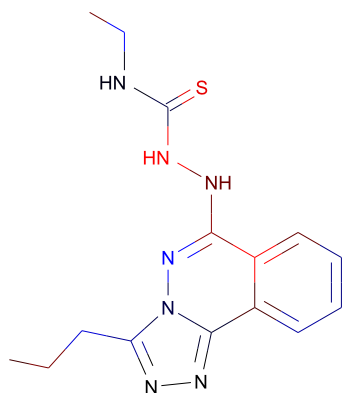

$C_{15}H_{19}N_7S$

Molecular Weight: 329.42325

ALogP: 3.388

Rotatable Bonds: 7

Acceptors: 5

Donors: 3

## Structural Similar Compounds

| Name                        | CARBAMIC ACID; [1-[(5-CYANOPENTYL)CARBAMOYL]BENZIMIDAZOL-2-YL]-; METHYL ESTER | OCHRATOXIN A    | CARBAMIC ACID; N-(5-BENZOYL)BENZIMIDAZOL-2-YL)-; METHYL ESTER |
|-----------------------------|-------------------------------------------------------------------------------|-----------------|---------------------------------------------------------------|
| Structure                   |                                                                               |                 |                                                               |
| Actual Endpoint (-log C)    | 2.12                                                                          | 4.305           | 2.617                                                         |
| Predicted Endpoint (-log C) | 1.78415                                                                       | 3.03558         | 2.2368                                                        |
| Distance                    | 0.666                                                                         | 0.720           | 0.725                                                         |
| Reference                   | 85ARAE 4;118;76/77                                                            | FCTXAV 6;479;68 | IYKEDH 19;735;88                                              |

## Model Prediction

Prediction: 0.742

Unit: g/kg\_body\_weight

Mahalanobis Distance: 26.7

Mahalanobis Distance p-value: 2.43e-041

Mahalanobis Distance: The Mahalanobis distance (MD) is a generalization of the Euclidean distance that accounts for correlations among the X properties. It is calculated as the distance to the center of the training data. The larger the MD, the less trustworthy the prediction.

Mahalanobis Distance p-value: The p-value gives the fraction of training data with an MD greater than or equal to the one for the given sample, assuming normally distributed data. The smaller the p-value, the less trustworthy the prediction. For highly non-normal X properties (e.g., fingerprints), the MD p-value is wildly inaccurate.

## Model Applicability

Unknown features are fingerprint features in the query molecule, but not found or appearing too infrequently in the training set.

1. All properties and OPS components are within expected ranges.
2. Unknown FCFP\_6 feature: 16: [\*]:[cH]:[\*]
3. Unknown FCFP\_6 feature: 1618154665: [\*]:[cH]:[cH]:[cH]:[\*]
4. Unknown FCFP\_6 feature: -1151884458: [\*]N[c](:n:[\*]):[c](:[\*]):[\*]
5. Unknown FCFP\_6 feature: 4427049: [\*][c](:[\*]):n:n(:[\*]):[\*]
6. Unknown FCFP\_6 feature: -332197802: [\*][c]1:[\*]:[\*]:[c](:[\*]):n:1:n:[\*]
7. Unknown FCFP\_6 feature: -1564473960: [\*]:n1:[\*]:[\*]:n:[c]:1:[c](:[\*]):[\*]
8. Unknown FCFP\_6 feature: 1294344583: [\*]NN[c](:[\*]):[\*]
9. Unknown FCFP\_6 feature: -1539162406: [\*]C[c]1:n:[\*]:[\*]:n:1:[\*]
10. Unknown FCFP\_6 feature: -885461129: [\*]NNC(=[\*])[\*]

## Feature Contribution

### Top features for positive contribution

| Fingerprint | Bit/Smiles | Feature Structure | Score |
|-------------|------------|-------------------|-------|
|             |            |                   |       |

|                                               |                   |                                                                                                                       |              |
|-----------------------------------------------|-------------------|-----------------------------------------------------------------------------------------------------------------------|--------------|
| ECFP_6                                        | 642810091         | 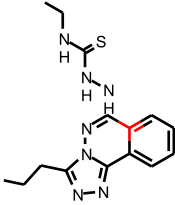<br><chem>[*]:[c](:[*]):[*]</chem> | 0.281        |
| FCFP_6                                        | 1499521844        | <br><chem>[*]NC(=O)N[*]</chem>     | 0.258        |
| ECFP_6                                        | -1897341097       | <br><chem>[*]N[*]</chem>           | 0.216        |
| <b>Top Features for negative contribution</b> |                   |                                                                                                                       |              |
| <b>Fingerprint</b>                            | <b>Bit/Smiles</b> | <b>Feature Structure</b>                                                                                              | <b>Score</b> |
| ECFP_6                                        | 497523368         | <br><chem>[*]CNC(=[*])[*]</chem>  | -0.301       |
| ECFP_6                                        | 655739385         | <br><chem>[*]:n:[*]</chem>       | -0.239       |



|        |           |                                                                                             |        |
|--------|-----------|---------------------------------------------------------------------------------------------|--------|
| ECFP_6 | 734603939 | 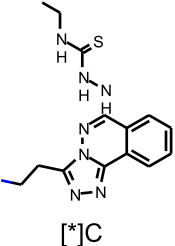<br>[*]C | -0.201 |
|--------|-----------|---------------------------------------------------------------------------------------------|--------|

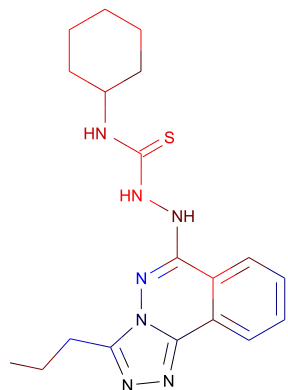

$C_{19}H_{25}N_7S$

Molecular Weight: 383.51369

ALogP: 4.898

Rotatable Bonds: 7

Acceptors: 5

Donors: 3

### Model Prediction

Prediction: 0.297

Unit: g/kg\_body\_weight

Mahalanobis Distance: 27.1

Mahalanobis Distance p-value: 1.27e-043

Mahalanobis Distance: The Mahalanobis distance (MD) is a generalization of the Euclidean distance that accounts for correlations among the X properties. It is calculated as the distance to the center of the training data. The larger the MD, the less trustworthy the prediction.

Mahalanobis Distance p-value: The p-value gives the fraction of training data with an MD greater than or equal to the one for the given sample, assuming normally distributed data. The smaller the p-value, the less trustworthy the prediction. For highly non-normal X properties (e.g., fingerprints), the MD p-value is wildly inaccurate.

### Structural Similar Compounds

| Name                        | PHOSPHORAMIDOTHIOIC ACID; ACETIMIDOYL-; O; O-bis-(p-CHLOROPHENYL)ESTER | OCHRATOXIN A    | [4-CHLORO-6-(2;3-XYLIDINO)2-PYRIMIDINYLTHIO]ACETIC ACID |
|-----------------------------|------------------------------------------------------------------------|-----------------|---------------------------------------------------------|
| Structure                   |                                                                        |                 |                                                         |
| Actual Endpoint (-log C)    | 5.006                                                                  | 4.305           | 1.892                                                   |
| Predicted Endpoint (-log C) | 3.23989                                                                | 3.03558         | 3.41405                                                 |
| Distance                    | 0.716                                                                  | 0.730           | 0.737                                                   |
| Reference                   | FMCHA2 -;C149;89                                                       | FCTXAV 6;479;68 | DRFUD4 4;273;79                                         |

### Model Applicability

Unknown features are fingerprint features in the query molecule, but not found or appearing too infrequently in the training set.

1. All properties and OPS components are within expected ranges.
2. Unknown FCFP\_6 feature: 16: [\*]:[cH]:[\*]
3. Unknown FCFP\_6 feature: 1618154665: [\*]:[cH]:[cH]:[cH]:[\*]
4. Unknown FCFP\_6 feature: -1151884458: [\*]N[c](:n:[\*]):[c](:[\*]):[\*]
5. Unknown FCFP\_6 feature: 4427049: [\*][c](:[\*]):n:n(:[\*]):[\*]
6. Unknown FCFP\_6 feature: -332197802: [\*][c]1:[\*]:[\*]:[c](:[\*]):n:1:n:[\*]
7. Unknown FCFP\_6 feature: -1564473960: [\*]:n1:[\*]:[\*]:n:[c]:1:[c](:[\*]):[\*]
8. Unknown FCFP\_6 feature: 1294344583: [\*]NN[c](:[\*]):[\*]
9. Unknown FCFP\_6 feature: -1539162406: [\*]C[c]1:n:[\*]:[\*]:n:1:[\*]
10. Unknown FCFP\_6 feature: -885461129: [\*]NNC(=[\*])[\*]

### Feature Contribution

#### Top features for positive contribution

| Fingerprint | Bit/Smiles | Feature Structure | Score |
|-------------|------------|-------------------|-------|
|             |            |                   |       |

|                                               |                   |                                                                                                         |              |
|-----------------------------------------------|-------------------|---------------------------------------------------------------------------------------------------------|--------------|
| ECFP_6                                        | 642810091         | 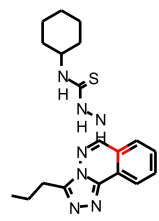<br>[*]:[c](:[*]):[*] | 0.281        |
| FCFP_6                                        | 1499521844        | <br>[*]NC(=O)N[*]    | 0.258        |
| ECFP_6                                        | -1897341097       | <br>[*]N[*]          | 0.216        |
| <b>Top Features for negative contribution</b> |                   |                                                                                                         |              |
| <b>Fingerprint</b>                            | <b>Bit/Smiles</b> | <b>Feature Structure</b>                                                                                | <b>Score</b> |
| ECFP_6                                        | 655739385         | <br>[*]:n:[*]       | -0.239       |
| ECFP_6                                        | 734603939         | <br>[*]C           | -0.201       |

|        |            |                                                                                                           |       |
|--------|------------|-----------------------------------------------------------------------------------------------------------|-------|
| ECFP_6 | 1795525632 | 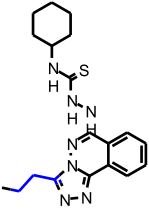<br>[*]CC[c](:[*]):[*] | 0.176 |
|--------|------------|-----------------------------------------------------------------------------------------------------------|-------|

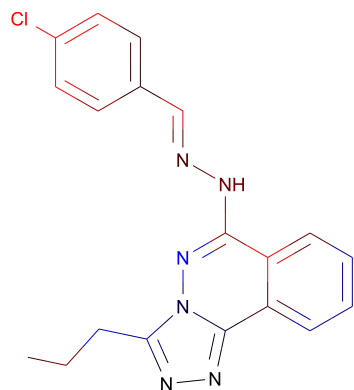

C<sub>19</sub>H<sub>17</sub>ClN<sub>6</sub>  
 Molecular Weight: 364.83147  
 ALogP: 4.967  
 Rotatable Bonds: 5  
 Acceptors: 5  
 Donors: 1

### Model Prediction

Prediction: 0.447

Unit: g/kg\_body\_weight

Mahalanobis Distance: 23.9

Mahalanobis Distance p-value: 2.66e-025

Mahalanobis Distance: The Mahalanobis distance (MD) is a generalization of the Euclidean distance that accounts for correlations among the X properties. It is calculated as the distance to the center of the training data. The larger the MD, the less trustworthy the prediction.

Mahalanobis Distance p-value: The p-value gives the fraction of training data with an MD greater than or equal to the one for the given sample, assuming normally distributed data. The smaller the p-value, the less trustworthy the prediction. For highly non-normal X properties (e.g., fingerprints), the MD p-value is wildly inaccurate.

### Structural Similar Compounds

| Name                        | TALNIFLUMATE     | INDOMETHAZINE     | ACRIDINE; 9-[3-(DIMETHYLAMINO)PROPYLAMINO]-1-NITRO- |
|-----------------------------|------------------|-------------------|-----------------------------------------------------|
| Structure                   |                  |                   |                                                     |
| Actual Endpoint (-log C)    | 1.538            | 5.17              | 4.101                                               |
| Predicted Endpoint (-log C) | 2.82541          | 3.33605           | 3.3633                                              |
| Distance                    | 0.671            | 0.676             | 0.687                                               |
| Reference                   | FRPSAX 36;372;81 | ARZNAD 25;1526;75 | MMDPA6 8;252;76                                     |

### Model Applicability

Unknown features are fingerprint features in the query molecule, but not found or appearing too infrequently in the training set.

1. All properties and OPS components are within expected ranges.
2. Unknown FCFP\_6 feature: 16: [\*]:[cH]:[\*]
3. Unknown FCFP\_6 feature: 1618154665: [\*]:[cH]:[cH]:[cH]:[\*]
4. Unknown FCFP\_6 feature: -1151884458: [\*]N[c](:n:[\*]):[c](:[\*]):[\*]
5. Unknown FCFP\_6 feature: 4427049: [\*][c](:[\*]):n:n(:[\*]):[\*]
6. Unknown FCFP\_6 feature: -332197802: [\*][c]1:[\*]:[\*]:[c](:[\*]):n:1:n:[\*]
7. Unknown FCFP\_6 feature: -1564473960: [\*]:n1:[\*]:[\*]:n:[c]:1:[c](:[\*]):[\*]
8. Unknown FCFP\_6 feature: -1539162406: [\*]C[c]1:n:[\*]:[\*]:n:1:[\*]
9. Unknown FCFP\_6 feature: 1294285001: [\*]=NN[c](:[\*]):[\*]
10. Unknown FCFP\_6 feature: 581019816: [\*]N\N=C\[\*]
11. Unknown FCFP\_6 feature: -2100785893: [\*]N=C[c](:[\*]):[\*]
12. Unknown FCFP\_6 feature: 71476542: [\*]:[c](:[\*])Cl

### Feature Contribution

#### Top features for positive contribution

| Fingerprint | Bit/Smiles | Feature Structure | Score |
|-------------|------------|-------------------|-------|
|             |            |                   |       |

|                                               |                   |                                                                                                                                             |              |
|-----------------------------------------------|-------------------|---------------------------------------------------------------------------------------------------------------------------------------------|--------------|
| ECFP_6                                        | 642810091         | 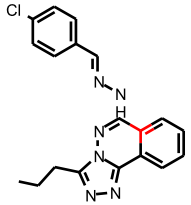<br>[*]:[c](:[*]):[*]                                    | 0.281        |
| ECFP_6                                        | -1897341097       | <br>[*]N[*]                                              | 0.216        |
| FCFP_6                                        | -149636017        | <br>[*]=C[c]1:[cH]:[cH]:[cH]:[cH]:1<br>c(Cl):[cH]:[cH]:1 | 0.193        |
| <b>Top Features for negative contribution</b> |                   |                                                                                                                                             |              |
| <b>Fingerprint</b>                            | <b>Bit/Smiles</b> | <b>Feature Structure</b>                                                                                                                    | <b>Score</b> |
| ECFP_6                                        | -817402818        | <br>[*]Cl                                               | -0.263       |
| ECFP_6                                        | 655739385         | <br>[*]:n:[*]                                          | -0.239       |

|        |           |                                                                                             |        |
|--------|-----------|---------------------------------------------------------------------------------------------|--------|
| ECFP_6 | 734603939 | 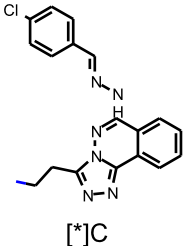<br>[*]C | -0.201 |
|--------|-----------|---------------------------------------------------------------------------------------------|--------|

9b

TOPKAT\_Rat\_Oral\_LD50

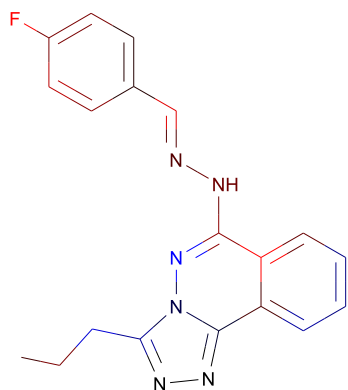C<sub>19</sub>H<sub>17</sub>FN<sub>6</sub>

Molecular Weight: 348.37688

ALogP: 4.508

Rotatable Bonds: 5

Acceptors: 5

Donors: 1

### Model Prediction

Prediction: 0.229

Unit: g/kg\_body\_weight

Mahalanobis Distance: 25.2

Mahalanobis Distance p-value: 3e-032

Mahalanobis Distance: The Mahalanobis distance (MD) is a generalization of the Euclidean distance that accounts for correlations among the X properties. It is calculated as the distance to the center of the training data. The larger the MD, the less trustworthy the prediction.

Mahalanobis Distance p-value: The p-value gives the fraction of training data with an MD greater than or equal to the one for the given sample, assuming normally distributed data. The smaller the p-value, the less trustworthy the prediction. For highly non-normal X properties (e.g., fingerprints), the MD p-value is wildly inaccurate.

### Structural Similar Compounds

| Name                        | ACRIDINE; 9-[3-(DIMETHYLAMINO)PROPYLAMINO]-1-NITRO- | INDOMETHAZINE     | TALNIFLUMATE     |
|-----------------------------|-----------------------------------------------------|-------------------|------------------|
| Structure                   |                                                     |                   |                  |
| Actual Endpoint (-log C)    | 4.101                                               | 5.17              | 1.538            |
| Predicted Endpoint (-log C) | 3.3633                                              | 3.33605           | 2.82541          |
| Distance                    | 0.657                                               | 0.680             | 0.682            |
| Reference                   | MMDPA6 8;252;76                                     | ARZNAD 25;1526;75 | FRPSAX 36;372;81 |

### Model Applicability

Unknown features are fingerprint features in the query molecule, but not found or appearing too infrequently in the training set.

1. All properties and OPS components are within expected ranges.
2. Unknown FCFP\_6 feature: 16: [\*]:[cH]:[\*]
3. Unknown FCFP\_6 feature: 1618154665: [\*]:[cH]:[cH]:[cH]:[\*]
4. Unknown FCFP\_6 feature: -1151884458: [\*]N[c](:n:[\*]):[c](:[\*]):[\*]
5. Unknown FCFP\_6 feature: 4427049: [\*][c](:[\*]):n:n(:[\*]):[\*]
6. Unknown FCFP\_6 feature: -332197802: [\*][c]1:[\*]:[\*]:[c](:[\*]):n:1:n:[\*]
7. Unknown FCFP\_6 feature: -1564473960: [\*]:n1:[\*]:[\*]:n:[c]:1:[c](:[\*]):[\*]
8. Unknown FCFP\_6 feature: -1539162406: [\*]C[c]1:n:[\*]:[\*]:n:1:[\*]
9. Unknown FCFP\_6 feature: 1294285001: [\*]=NN[c](:[\*]):[\*]
10. Unknown FCFP\_6 feature: 581019816: [\*]N\N=C\[\*]
11. Unknown FCFP\_6 feature: -2100785893: [\*]N=C[c](:[\*]):[\*]
12. Unknown FCFP\_6 feature: 71476542: [\*]:[c](:[\*])Cl

### Feature Contribution

#### Top features for positive contribution

| Fingerprint | Bit/Smiles | Feature Structure | Score |
|-------------|------------|-------------------|-------|
|             |            |                   |       |



| ECFP_6                                 | -1046436026 | 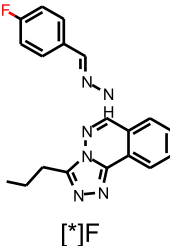<br>[*]F              | 0.349  |
|----------------------------------------|-------------|----------------------------------------------------------------------------------------------------------|--------|
| ECFP_6                                 | 642810091   | <br>[*]:[c](:[*]):[*] | 0.281  |
| ECFP_6                                 | -1897341097 | <br>[*]N[*]           | 0.216  |
| Top Features for negative contribution |             |                                                                                                          |        |
| Fingerprint                            | Bit/Smiles  | Feature Structure                                                                                        | Score  |
| ECFP_6                                 | 655739385   | <br>[*]:n:[*]        | -0.239 |
| ECFP_6                                 | 734603939   | <br>[*]C            | -0.201 |

|        |             |                                                                                                         |        |
|--------|-------------|---------------------------------------------------------------------------------------------------------|--------|
| ECFP_6 | -1795525632 | 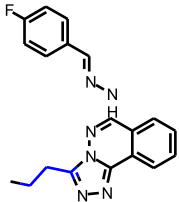<br>[*]CC[c]:[*]:[*] | -0.176 |
|--------|-------------|---------------------------------------------------------------------------------------------------------|--------|

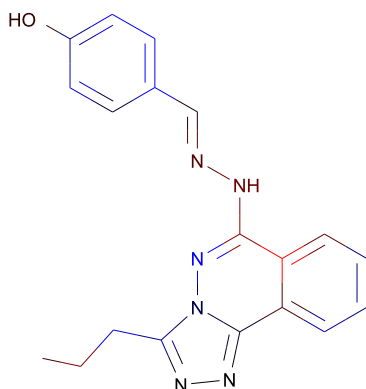

$C_{19}H_{18}N_6O$

Molecular Weight: 346.38582

ALogP: 4.061

Rotatable Bonds: 5

Acceptors: 6

Donors: 2

### Model Prediction

Prediction: 0.501

Unit: g/kg\_body\_weight

Mahalanobis Distance: 24.6

Mahalanobis Distance p-value: 9.13e-029

Mahalanobis Distance: The Mahalanobis distance (MD) is a generalization of the Euclidean distance that accounts for correlations among the X properties. It is calculated as the distance to the center of the training data. The larger the MD, the less trustworthy the prediction.

Mahalanobis Distance p-value: The p-value gives the fraction of training data with an MD greater than or equal to the one for the given sample, assuming normally distributed data. The smaller the p-value, the less trustworthy the prediction. For highly non-normal X properties (e.g., fingerprints), the MD p-value is wildly inaccurate.

### Structural Similar Compounds

| Name                        | ACRIDINE; 9-[3-(DIMETHYLAMINO)PROPYLAMINO]-1-NITRO- | FLUBENDAZOLE   | CARBAMIC ACID; N-(5-BENZOYL BENZIMIDAZOL-2-YL)-; METHYL ESTER |
|-----------------------------|-----------------------------------------------------|----------------|---------------------------------------------------------------|
| Structure                   |                                                     |                |                                                               |
| Actual Endpoint (-log C)    | 4.101                                               | 2.088          | 2.617                                                         |
| Predicted Endpoint (-log C) | 3.3633                                              | 2.69288        | 2.2368                                                        |
| Distance                    | 0.701                                               | 0.709          | 0.713                                                         |
| Reference                   | MMDPA6 8;252;76                                     | YRTMA6 9;11;78 | IYKEDH 19;735;88                                              |

### Model Applicability

Unknown features are fingerprint features in the query molecule, but not found or appearing too infrequently in the training set.

- All properties and OPS components are within expected ranges.
- Unknown FCFP\_6 feature: 16: [\*]:[cH]:[\*]
- Unknown FCFP\_6 feature: 1618154665: [\*]:[cH]:[cH]:[cH]:[\*]
- Unknown FCFP\_6 feature: -1151884458: [\*]N[c](:n:[\*]):[c](:[\*]):[\*]
- Unknown FCFP\_6 feature: 4427049: [\*][c](:[\*]):n:n(:[\*]):[\*]
- Unknown FCFP\_6 feature: -332197802: [\*][c]1:[\*]:[\*]:[c](:[\*]):n:1:n:[\*]
- Unknown FCFP\_6 feature: -1564473960: [\*]:n1:[\*]:[\*]:n:[c]:1:[c](:[\*]):[\*]
- Unknown FCFP\_6 feature: -1539162406: [\*]C[c]1:n:[\*]:[\*]:n:1:[\*]
- Unknown FCFP\_6 feature: 1294285001: [\*]=NN[c](:[\*]):[\*]
- Unknown FCFP\_6 feature: 581019816: [\*]N\N=C\[\*]
- Unknown FCFP\_6 feature: -2100785893: [\*]N=C[c](:[\*]):[\*]
- Unknown FCFP\_6 feature: 74595001: [\*]:[cH]:[c](O):[cH]:[\*]
- Unknown FCFP\_6 feature: -549108873: [\*]:[c](:[\*])O

### Feature Contribution

#### Top features for positive contribution

| Fingerprint | Bit/Smiles | Feature Structure | Score |
|-------------|------------|-------------------|-------|
|             |            |                   |       |

| ECFP_6                                 | 642810091  | 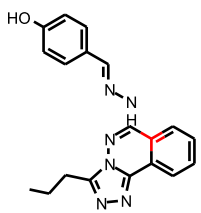<br>[*]:[c](:[*]):[*]                      | 0.281  |
|----------------------------------------|------------|------------------------------------------------------------------------------------------------------------------------------|--------|
| ECFP_6                                 | 1897341097 | <br>[*]N[*]                               | 0.216  |
| ECFP_6                                 | 2019062761 | <br>[*]:[c](:[*])O                        | 0.138  |
| Top Features for negative contribution |            |                                                                                                                              |        |
| Fingerprint                            | Bit/Smiles | Feature Structure                                                                                                            | Score  |
| ECFP_6                                 | 655739385  | <br>[*]:n[*]                             | -0.239 |
| FCFP_6                                 | 946589555  | <br>[*][c]1:[*]:[cH]:[c](O):[cH]:[cH]:1 | -0.204 |

|        |           |                                                                                                 |        |
|--------|-----------|-------------------------------------------------------------------------------------------------|--------|
| ECFP_6 | 734603939 | 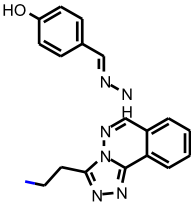 <p>[*]C</p> | -0.201 |
|--------|-----------|-------------------------------------------------------------------------------------------------|--------|

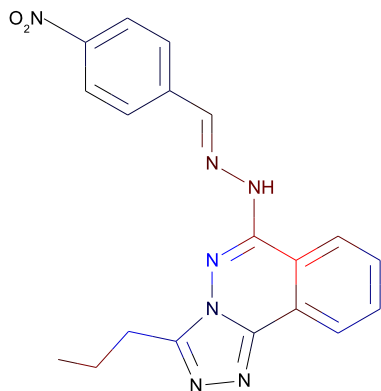

$C_{19}H_{17}N_7O_2$   
 Molecular Weight: 375.38397  
 ALogP: 4.197  
 Rotatable Bonds: 6  
 Acceptors: 7  
 Donors: 1

### Model Prediction

Prediction: 0.573  
 Unit: g/kg\_body\_weight  
 Mahalanobis Distance: 27.1  
 Mahalanobis Distance p-value: 5.18e-044

Mahalanobis Distance: The Mahalanobis distance (MD) is a generalization of the Euclidean distance that accounts for correlations among the X properties. It is calculated as the distance to the center of the training data. The larger the MD, the less trustworthy the prediction.

Mahalanobis Distance p-value: The p-value gives the fraction of training data with an MD greater than or equal to the one for the given sample, assuming normally distributed data. The smaller the p-value, the less trustworthy the prediction. For highly non-normal X properties (e.g., fingerprints), the MD p-value is wildly inaccurate.

### Structural Similar Compounds

| Name                        | ACEMETACIN        | bis-OXATIN ACETATE | PRASOZIN .HCI (HCI STRIPPED) |
|-----------------------------|-------------------|--------------------|------------------------------|
| Structure                   |                   |                    |                              |
| Actual Endpoint (-log C)    | 4.235             | 1.717              | 2.294                        |
| Predicted Endpoint (-log C) | 3.39415           | 2.40947            | 3.00765                      |
| Distance                    | 0.695             | 0.721              | 0.728                        |
| Reference                   | ARZNAD 30;1398;80 | NIIRDN 6;609;82    | NIIRDN 6;688;82              |

### Model Applicability

Unknown features are fingerprint features in the query molecule, but not found or appearing too infrequently in the training set.

1. All properties and OPS components are within expected ranges.
2. Unknown ECFP\_2 feature: 1043790491: [\*][N+](=[\*])[\*]
3. Unknown ECFP\_2 feature: 781519895: [\*][O-]
4. Unknown ECFP\_2 feature: -179073144: [\*][N+](=[\*])[c](:[cH]:[\*]):[cH]:[\*]
5. Unknown ECFP\_2 feature: -215026467: [\*]:[c](:[\*])[N+](=O)[O-]
6. Unknown ECFP\_2 feature: 2104376220: [\*][N+](=O)[\*]
7. Unknown ECFP\_2 feature: -659271057: [\*][N+](=[\*])[O-]
8. Unknown FCFP\_6 feature: 16: [\*]:[cH]:[\*]
9. Unknown FCFP\_6 feature: 8: [\*][N+](=[\*])[\*]
10. Unknown FCFP\_6 feature: 5: [\*][O-]
11. Unknown FCFP\_6 feature: 1618154665: [\*]:[cH]:[cH]:[cH]:[\*]
12. Unknown FCFP\_6 feature: -1151884458: [\*]N[c](:n:[\*]):[c](:[\*]):[\*]
13. Unknown FCFP\_6 feature: 4427049: [\*][c](:[\*]):n:n(:[\*]):[\*]
14. Unknown FCFP\_6 feature: -332197802: [\*][c]1:[\*]:[\*]:[c](:[\*]):n:1:n:[\*]
15. Unknown FCFP\_6 feature: -1564473960: [\*]:n1:[\*]:[\*]:n:[c]:1:[c](:[\*]):[\*]
16. Unknown FCFP\_6 feature: -1539162406: [\*]C[c]1:n:[\*]:[\*]:n:1:[\*]
17. Unknown FCFP\_6 feature: 1294285001: [\*]=NN[c](:[\*]):[\*]
18. Unknown FCFP\_6 feature: 581019816: [\*]N\N=C\[\*]
19. Unknown FCFP\_6 feature: -2100785893: [\*]N=C[c](:[\*]):[\*]

- 20. Unknown FCFP\_6 feature: -828984032: [\*][N+](=[\*])[c](-:[cH]:[\*]):[cH]:[\*]
- 21. Unknown FCFP\_6 feature: -1338588315: [\*]:[c](:[\*])[N+](=O)[O-]
- 22. Unknown FCFP\_6 feature: 1872392852: [\*][N+](=O)[\*]
- 23. Unknown FCFP\_6 feature: 260476081: [\*][N+](=[\*])[O-]

## Feature Contribution

### Top features for positive contribution

| Fingerprint | Bit/Smiles  | Feature Structure                                                                                                     | Score |
|-------------|-------------|-----------------------------------------------------------------------------------------------------------------------|-------|
| ECFP_6      | 642810091   | 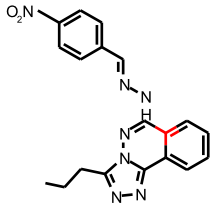<br><chem>[*]:[c](:[*]):[*]</chem> | 0.281 |
| ECFP_6      | -1897341097 | <br><chem>[*]N[*]</chem>           | 0.216 |
| ECFP_6      | -1074141656 | <br><chem>[*]=O</chem>            | 0.142 |

### Top Features for negative contribution

| Fingerprint | Bit/Smiles | Feature Structure | Score |
|-------------|------------|-------------------|-------|
|             |            |                   |       |

|        |             |                                                                                                                                             |        |
|--------|-------------|---------------------------------------------------------------------------------------------------------------------------------------------|--------|
| ECFP_6 | 655739385   | 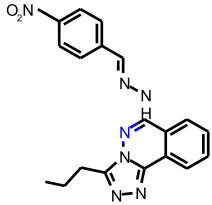 <p data-bbox="1459 324 1543 349">[*]:n:[*]</p>          | -0.239 |
| ECFP_6 | 734603939   |  <p data-bbox="1480 592 1533 617">[*]C</p>               | -0.201 |
| ECFP_6 | -1795525632 |  <p data-bbox="1396 860 1564 885">[*]CC[c](:[*]):[*]</p> | -0.176 |



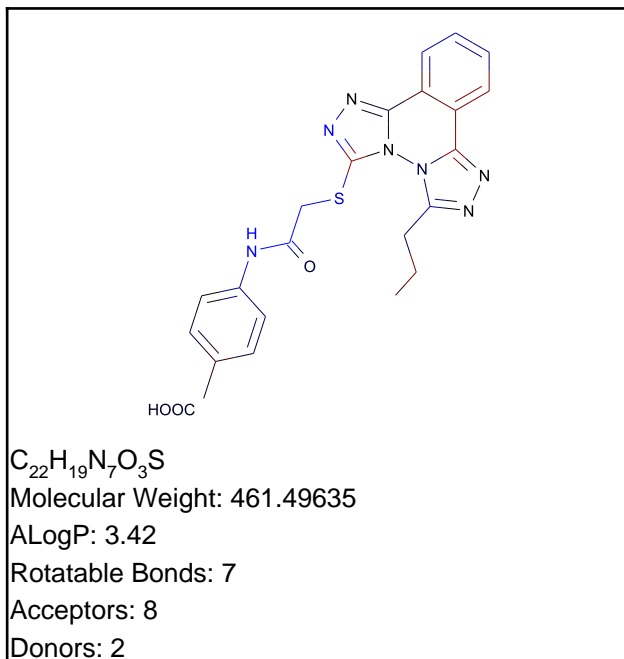

### Model Prediction

Prediction: 2.37

Unit: g/kg\_body\_weight

Mahalanobis Distance: 28.8

Mahalanobis Distance p-value: 1.8e-055

Mahalanobis Distance: The Mahalanobis distance (MD) is a generalization of the Euclidean distance that accounts for correlations among the X properties. It is calculated as the distance to the center of the training data. The larger the MD, the less trustworthy the prediction.

Mahalanobis Distance p-value: The p-value gives the fraction of training data with an MD greater than or equal to the one for the given sample, assuming normally distributed data. The smaller the p-value, the less trustworthy the prediction. For highly non-normal X properties (e.g., fingerprints), the MD p-value is wildly inaccurate.

### Structural Similar Compounds

| Name                        | BENZENESULFONIC ACID; 2;2'-(4;4'-BIPHENYLENEDIVINYLENE)DI-; DISODIUM SALT (Na STRIPPED) | BENZOTHAZOLE; 6-NITRO-2-(p-NITROBENZOYLAMINO)-                                      | AZOSEMIDE                                                                           |
|-----------------------------|-----------------------------------------------------------------------------------------|-------------------------------------------------------------------------------------|-------------------------------------------------------------------------------------|
| Structure                   | 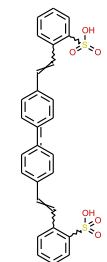     |  |  |
| Actual Endpoint (-log C)    | 1.968                                                                                   | 2.361                                                                               | 2.163                                                                               |
| Predicted Endpoint (-log C) | 1.72109                                                                                 | 2.96257                                                                             | 2.21052                                                                             |
| Distance                    | 0.839                                                                                   | 0.960                                                                               | 0.986                                                                               |
| Reference                   | MVCRB3 2;193;73                                                                         | JPETAB 90;260;47                                                                    | IYKEDH 18;666;87                                                                    |

### Model Applicability

Unknown features are fingerprint features in the query molecule, but not found or appearing too infrequently in the training set.

1. All properties and OPS components are within expected ranges.
2. Unknown ECFP\_2 feature: 1986731747: [\*]S[c]1:n:[\*]:[\*]:n:1:[\*]
3. Unknown ECFP\_2 feature: 78665610: [\*][c]1:[\*]:[\*]:[c](:[\*]):n:1:n(:[\*]):[\*]
4. Unknown FCFP\_6 feature: 16: [\*]:[cH]:[\*]
5. Unknown FCFP\_6 feature: -1410079687: [\*]S[c]1:n:[\*]:[\*]:n:1:[\*]
6. Unknown FCFP\_6 feature: 4427049: [\*][c](:[\*]):n:n(:[\*]):[\*]
7. Unknown FCFP\_6 feature: -1539162406: [\*]C[c]1:n:[\*]:[\*]:n:1:[\*]
8. Unknown FCFP\_6 feature: -1564473960: [\*]:n1:[\*]:[\*]:n:[c]:1:[c](:[\*]):[\*]
9. Unknown FCFP\_6 feature: -332197802: [\*][c]1:[\*]:[\*]:[c](:[\*]):n:1:n:[\*]
10. Unknown FCFP\_6 feature: 1618154665: [\*]:[cH]:[cH]:[cH]:[\*]
11. Unknown FCFP\_6 feature: -1549222613: [\*]:[c](:[\*])C(=O)O

### Feature Contribution

#### Top features for positive contribution

| Fingerprint | Bit/Smiles | Feature Structure | Score |
|-------------|------------|-------------------|-------|
|             |            |                   |       |

|                                               |                   |                                                                                                                                                     |              |
|-----------------------------------------------|-------------------|-----------------------------------------------------------------------------------------------------------------------------------------------------|--------------|
| ECFP_6                                        | 642810091         | 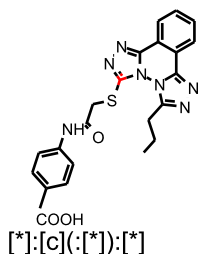<br><chem>[*]:[c](:[*]):[*]</chem>                                | 0.281        |
| ECFP_6                                        | -1897341097       | <br><chem>[*]N[*]</chem>                                         | 0.216        |
| ECFP_6                                        | 1444581947        | <br><chem>[*]C(=[*])c1:[cH]:[cH]:[*]:[c]([*]):[cH]:[cH]:1</chem> | 0.163        |
| <b>Top Features for negative contribution</b> |                   |                                                                                                                                                     |              |
| <b>Fingerprint</b>                            | <b>Bit/Smiles</b> | <b>Feature Structure</b>                                                                                                                            | <b>Score</b> |
| ECFP_6                                        | 655739385         | <br><chem>[*]:n:[*]</chem>                                      | -0.239       |
| FCFP_6                                        | 566058135         | <br><chem>[*]CC(=O)N[*]</chem>                                 | -0.216       |



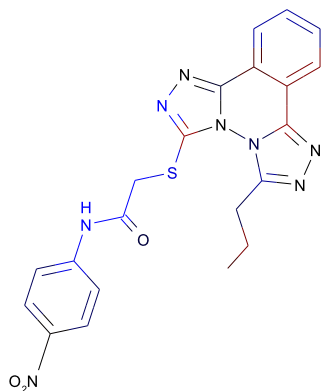

$C_{21}H_{18}N_8O_3S$

Molecular Weight: 462.48441

ALogP: 3.685

Rotatable Bonds: 7

Acceptors: 8

Donors: 1

### Model Prediction

Prediction: 1.86

Unit: g/kg\_body\_weight

Mahalanobis Distance: 27.7

Mahalanobis Distance p-value: 6.3e-048

Mahalanobis Distance: The Mahalanobis distance (MD) is a generalization of the Euclidean distance that accounts for correlations among the X properties. It is calculated as the distance to the center of the training data. The larger the MD, the less trustworthy the prediction.

Mahalanobis Distance p-value: The p-value gives the fraction of training data with an MD greater than or equal to the one for the given sample, assuming normally distributed data. The smaller the p-value, the less trustworthy the prediction. For highly non-normal X properties (e.g., fingerprints), the MD p-value is wildly inaccurate.

### Structural Similar Compounds

| Name                        | BENZENESULFONIC ACID; 2;2'-(4;4'-BIPHENYLENEDIVINYLENE)DI-; DISODIUM SALT (Na STRIPPED) | BENZOTHAZOLE; 6-NITRO-2-(p-NITROBENZOYLAMINO)- | ACEMETACIN        |
|-----------------------------|-----------------------------------------------------------------------------------------|------------------------------------------------|-------------------|
| Structure                   |                                                                                         |                                                |                   |
| Actual Endpoint (-log C)    | 1.968                                                                                   | 2.361                                          | 4.235             |
| Predicted Endpoint (-log C) | 1.72109                                                                                 | 2.96257                                        | 3.39415           |
| Distance                    | 0.884                                                                                   | 0.916                                          | 1.015             |
| Reference                   | MVCRB3 2;193;73                                                                         | JPETAB 90;260;47                               | ARZNAD 30;1398;80 |

### Model Applicability

Unknown features are fingerprint features in the query molecule, but not found or appearing too infrequently in the training set.

1. All properties and OPS components are within expected ranges.
2. Unknown ECFP\_2 feature: 1043790491: [\*][N+](=\*)[\*]
3. Unknown ECFP\_2 feature: 781519895: [\*][O-]
4. Unknown ECFP\_2 feature: 1986731747: [\*]S[c]1:n:[\*]:[\*]:n:1:[\*]
5. Unknown ECFP\_2 feature: 78665610: [\*][c]1:[\*]:[\*]:[c](:[\*]):n:1:n(:[\*]):[\*]
6. Unknown ECFP\_2 feature: -179073144: [\*][N+](=\*)[c](:[cH]:[\*]):[cH]:[\*]
7. Unknown ECFP\_2 feature: -215026467: [\*]:[c](:[\*])[N+](=O)[O-]
8. Unknown ECFP\_2 feature: 2104376220: [\*][N+](=O)[\*]
9. Unknown ECFP\_2 feature: -659271057: [\*][N+](=\*)[O-]
10. Unknown FCFP\_6 feature: 16: [\*]:[cH]:[\*]
11. Unknown FCFP\_6 feature: 8: [\*][N+](=\*)[\*]
12. Unknown FCFP\_6 feature: 5: [\*][O-]
13. Unknown FCFP\_6 feature: -1410079687: [\*]S[c]1:n:[\*]:[\*]:n:1:[\*]
14. Unknown FCFP\_6 feature: 4427049: [\*][c](:[\*]):n:n(:[\*]):[\*]
15. Unknown FCFP\_6 feature: -1539162406: [\*]C[c]1:n:[\*]:[\*]:n:1:[\*]
16. Unknown FCFP\_6 feature: -1564473960: [\*]:n1:[\*]:[\*]:n:[c](:[\*]):[\*]
17. Unknown FCFP\_6 feature: -332197802: [\*][c]1:[\*]:[\*]:[c](:[\*]):n:1:n:[\*]

18. Unknown FCFP\_6 feature: 1618154665: [\*]:[cH]:[cH]:[cH]:[\*]
19. Unknown FCFP\_6 feature: -828984032: [\*][N+](=[\*])[c](:[cH]:[\*]):[cH]:[\*]
20. Unknown FCFP\_6 feature: -1338588315: [\*]:[c](:[\*])[N+](=O)[O-]
21. Unknown FCFP\_6 feature: 1872392852: [\*][N+](=O)[\*]
22. Unknown FCFP\_6 feature: 260476081: [\*][N+](=[\*])[O-]

## Feature Contribution

### Top features for positive contribution

| Fingerprint | Bit/Smiles  | Feature Structure                                                                                        | Score |
|-------------|-------------|----------------------------------------------------------------------------------------------------------|-------|
| ECFP_6      | 642810091   | 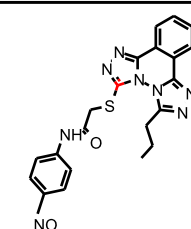<br>[*]:[c](:[*]):[*] | 0.281 |
| ECFP_6      | -1897341097 | <br>[*]N[*]           | 0.216 |
| ECFP_6      | -1074141656 | <br>[*]=O            | 0.142 |

### Top Features for negative contribution

| Fingerprint | Bit/Smiles | Feature Structure | Score |
|-------------|------------|-------------------|-------|
|             |            |                   |       |

|        |           |                                                                                                                   |        |
|--------|-----------|-------------------------------------------------------------------------------------------------------------------|--------|
| ECFP_6 | 655739385 | 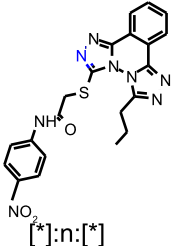<br><chem>[*]:n:[*]</chem>     | -0.239 |
| FCFP_6 | 566058135 | <br><chem>[*]CC(=O)N[*]</chem> | -0.216 |
| ECFP_6 | 734603939 | <br><chem>[*]C</chem>          | -0.201 |

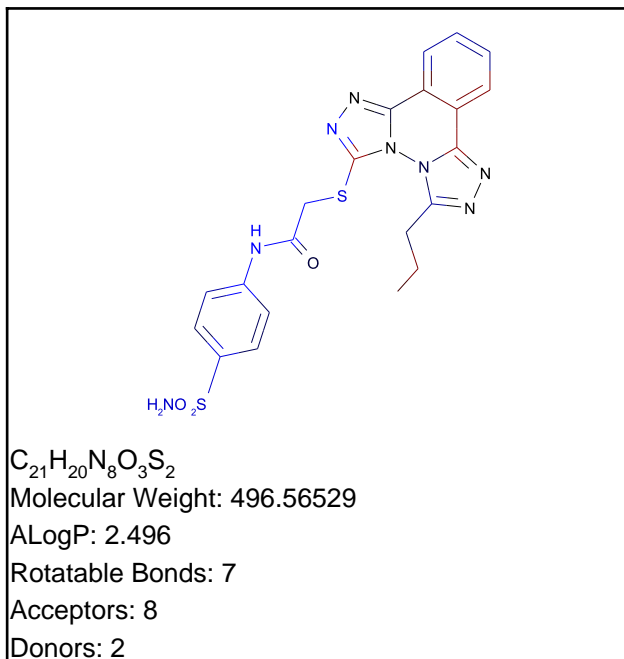

### Model Prediction

Prediction: 12.3

Unit: g/kg\_body\_weight

Mahalanobis Distance: 29.9

Mahalanobis Distance p-value: 8.72e-064

Mahalanobis Distance: The Mahalanobis distance (MD) is a generalization of the Euclidean distance that accounts for correlations among the X properties. It is calculated as the distance to the center of the training data. The larger the MD, the less trustworthy the prediction.

Mahalanobis Distance p-value: The p-value gives the fraction of training data with an MD greater than or equal to the one for the given sample, assuming normally distributed data. The smaller the p-value, the less trustworthy the prediction. For highly non-normal X properties (e.g., fingerprints), the MD p-value is wildly inaccurate.

### Structural Similar Compounds

| Name                        | AZOSEMIDE                                                                           | BENZENESULFONIC ACID; 2;2'-(4;4'-BIPHENYLYLENE)DI-; DISODIUM SALT (Na STRIPPED)     | 2;7-NAPHTHALENE DISULFONIC ACID; 4-AMINO-5-HYDROXY-; p-TOLUENE SULFONATE ESTER      |
|-----------------------------|-------------------------------------------------------------------------------------|-------------------------------------------------------------------------------------|-------------------------------------------------------------------------------------|
| Structure                   | 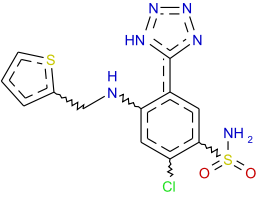 |  |  |
| Actual Endpoint (-log C)    | 2.163                                                                               | 1.968                                                                               | 1.615                                                                               |
| Predicted Endpoint (-log C) | 2.21052                                                                             | 1.72109                                                                             | 1.79606                                                                             |
| Distance                    | 0.931                                                                               | 0.947                                                                               | 0.955                                                                               |
| Reference                   | IYKEDH 18;666;87                                                                    | MVCRB3 2;193;73                                                                     | 85JCAE -;1063;86                                                                    |

### Model Applicability

Unknown features are fingerprint features in the query molecule, but not found or appearing too infrequently in the training set.

1. All properties and OPS components are within expected ranges.
2. Unknown ECFP\_2 feature: 1986731747: [\*]S[c]1:n:[\*]:[\*]:n:1:[\*]
3. Unknown ECFP\_2 feature: 78665610: [\*][c]1:[\*]:[\*]:[c](:[\*]):n:1:n(:[\*]):[\*]
4. Unknown FCFP\_6 feature: 16: [\*]:[cH]:[\*]
5. Unknown FCFP\_6 feature: -1410079687: [\*]S[c]1:n:[\*]:[\*]:n:1:[\*]
6. Unknown FCFP\_6 feature: 4427049: [\*][c](:[\*]):n:n(:[\*]):[\*]
7. Unknown FCFP\_6 feature: -1539162406: [\*]C[c]1:n:[\*]:[\*]:n:1:[\*]
8. Unknown FCFP\_6 feature: -1564473960: [\*]:n1:[\*]:[\*]:n:[c]:1:[c](:[\*]):[\*]
9. Unknown FCFP\_6 feature: -332197802: [\*][c]1:[\*]:[\*]:[c](:[\*]):n:1:n:[\*]
10. Unknown FCFP\_6 feature: 1618154665: [\*]:[cH]:[cH]:[cH]:[\*]

### Feature Contribution

#### Top features for positive contribution

| Fingerprint | Bit/Smiles | Feature Structure | Score |
|-------------|------------|-------------------|-------|
|             |            |                   |       |





|        |           |                                                                                                                   |        |
|--------|-----------|-------------------------------------------------------------------------------------------------------------------|--------|
| FCFP_6 | 566058135 | 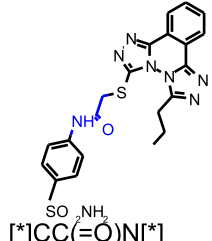<br><chem>[*]CC(=O)N[*]</chem> | -0.216 |
|--------|-----------|-------------------------------------------------------------------------------------------------------------------|--------|

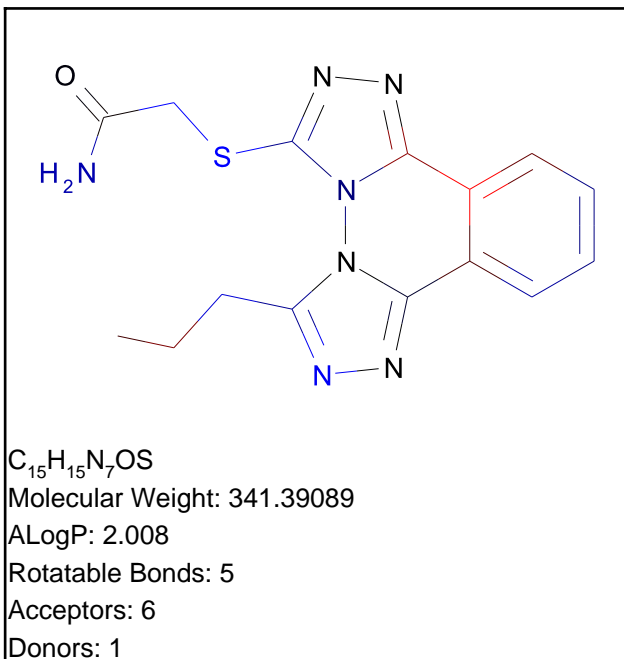

### Model Prediction

Prediction: 0.542

Unit: g/kg\_body\_weight

Mahalanobis Distance: 25.8

Mahalanobis Distance p-value: 5.79e-036

Mahalanobis Distance: The Mahalanobis distance (MD) is a generalization of the Euclidean distance that accounts for correlations among the X properties. It is calculated as the distance to the center of the training data. The larger the MD, the less trustworthy the prediction.

Mahalanobis Distance p-value: The p-value gives the fraction of training data with an MD greater than or equal to the one for the given sample, assuming normally distributed data. The smaller the p-value, the less trustworthy the prediction. For highly non-normal X properties (e.g., fingerprints), the MD p-value is wildly inaccurate.

### Structural Similar Compounds

| Name                        | PRASOZIN .HCl (HCl STRIPPED)                                                        | AZATHIOPRINE                                                                        | SULFAQUINOXALINE                                                                    |
|-----------------------------|-------------------------------------------------------------------------------------|-------------------------------------------------------------------------------------|-------------------------------------------------------------------------------------|
| Structure                   | 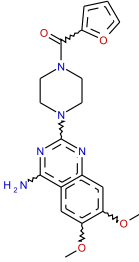 |  |  |
| Actual Endpoint (-log C)    | 2.294                                                                               | 2.715                                                                               | 2.341                                                                               |
| Predicted Endpoint (-log C) | 3.00765                                                                             | 2.77505                                                                             | 2.42674                                                                             |
| Distance                    | 0.684                                                                               | 0.700                                                                               | 0.729                                                                               |
| Reference                   | NIIRDN 6;688;82                                                                     | NIIRDN 6;3;82                                                                       | MahWM# 16NOV82                                                                      |

### Model Applicability

Unknown features are fingerprint features in the query molecule, but not found or appearing too infrequently in the training set.

1. All properties and OPS components are within expected ranges.
2. Unknown ECFP\_2 feature: 78665610: [\*][c]1:[\*]:[\*]:[c](:[\*]):n:1:n(:[\*]):[\*]
3. Unknown ECFP\_2 feature: 1986731747: [\*]S[c]1:n:[\*]:[\*]:n:1:[\*]
4. Unknown FCFP\_6 feature: 16: [\*]:[cH]:[\*]
5. Unknown FCFP\_6 feature: 1618154665: [\*]:[cH]:[cH]:[cH]:[\*]
6. Unknown FCFP\_6 feature: -1564473960: [\*]:n1:[\*]:[\*]:n:[c]:1:[c](:[\*]):[\*]
7. Unknown FCFP\_6 feature: -332197802: [\*][c]1:[\*]:[\*]:[c](:[\*]):n:1:n:[\*]
8. Unknown FCFP\_6 feature: -1539162406: [\*]C[c]1:n:[\*]:[\*]:n:1:[\*]
9. Unknown FCFP\_6 feature: 4427049: [\*][c](:[\*]):n:n(:[\*]):[\*]
10. Unknown FCFP\_6 feature: -1410079687: [\*]S[c]1:n:[\*]:[\*]:n:1:[\*]

### Feature Contribution

#### Top features for positive contribution

| Fingerprint | Bit/Smiles | Feature Structure | Score |
|-------------|------------|-------------------|-------|
|             |            |                   |       |

|                                               |                   |                                                                                                          |              |
|-----------------------------------------------|-------------------|----------------------------------------------------------------------------------------------------------|--------------|
| ECFP_6                                        | 642810091         | 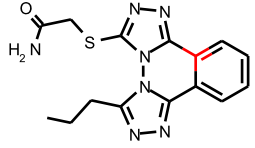<br>[*]:[c](:[*]):[*] | 0.281        |
| ECFP_6                                        | -1074141656       | <br>[*]=O             | 0.142        |
| ECFP_6                                        | -932108170        | <br>[*]C(=[*])N       | 0.126        |
| <b>Top Features for negative contribution</b> |                   |                                                                                                          |              |
| <b>Fingerprint</b>                            | <b>Bit/Smiles</b> | <b>Feature Structure</b>                                                                                 | <b>Score</b> |
| ECFP_6                                        | 655739385         | <br>[*]:n:[*]       | -0.239       |
| FCFP_6                                        | 566058135         | <br>[*]CC(=O)N[*]   | -0.216       |

|        |           |                                                                                                                               |        |
|--------|-----------|-------------------------------------------------------------------------------------------------------------------------------|--------|
| ECFP_6 | 734603939 | 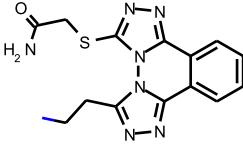 <p data-bbox="1480 308 1533 341">[*]C</p> | -0.201 |
|--------|-----------|-------------------------------------------------------------------------------------------------------------------------------|--------|

# Doxorubicin

TOPKAT\_Rat\_Oral\_LD50

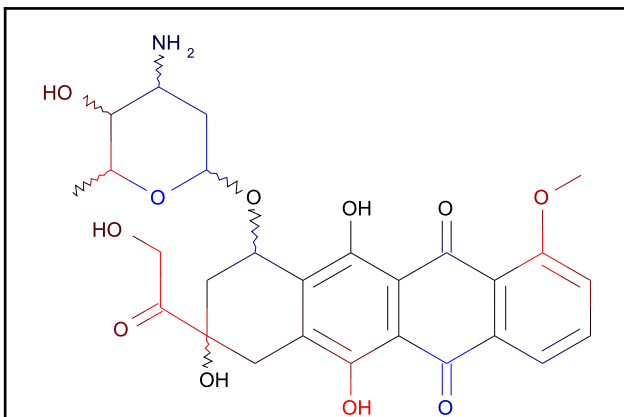

$C_{27}H_{29}NO_{11}$

Molecular Weight: 543.51925

ALogP: -4.4e-002

Rotatable Bonds: 5

Acceptors: 12

Donors: 6

## Model Prediction

Prediction: 0.227

Unit: g/kg\_body\_weight

Mahalanobis Distance: 23.8

Mahalanobis Distance p-value: 7.02e-025

Mahalanobis Distance: The Mahalanobis distance (MD) is a generalization of the Euclidean distance that accounts for correlations among the X properties. It is calculated as the distance to the center of the training data. The larger the MD, the less trustworthy the prediction.

Mahalanobis Distance p-value: The p-value gives the fraction of training data with an MD greater than or equal to the one for the given sample, assuming normally distributed data. The smaller the p-value, the less trustworthy the prediction. For highly non-normal X properties (e.g., fingerprints), the MD p-value is wildly inaccurate.

## Structural Similar Compounds

| Name                        | DAUNOMYCIN       | VIRIDICATUM TOXIN | SECALONIC ACID   |
|-----------------------------|------------------|-------------------|------------------|
| Structure                   |                  |                   |                  |
| Actual Endpoint (-log C)    | 3.196            | 3.666             | 4.463            |
| Predicted Endpoint (-log C) | 3.6117           | 3.0269            | 3.37815          |
| Distance                    | 0.329            | 0.669             | 0.680            |
| Reference                   | YKYUA6 25;573;74 | TXAPA9 24;507;73  | TXAPA9 48;A14;79 |

## Model Applicability

Unknown features are fingerprint features in the query molecule, but not found or appearing too infrequently in the training set.

1. All properties and OPS components are within expected ranges.
2. Unknown FCFP\_6 feature: 16: [\*]:[cH]:[\*]
3. Unknown FCFP\_6 feature: 1618154665: [\*]:[cH]:[cH]:[cH]:[\*]
4. Unknown FCFP\_6 feature: -1549669478: [\*]:[c](:[\*])C(=O)[c](:[\*]):[\*]
5. Unknown FCFP\_6 feature: 74595001: [\*]:[cH]:[c](O):[cH]:[\*]
6. Unknown FCFP\_6 feature: 1186333723: [\*]CC(O[\*])[c](:[\*]):[\*]
7. Unknown FCFP\_6 feature: -549108873: [\*]:[c](:[\*])O

## Feature Contribution

### Top features for positive contribution

| Fingerprint | Bit/Smiles | Feature Structure | Score |
|-------------|------------|-------------------|-------|
|             |            |                   |       |

|                                               |                   |                                                                                                          |              |
|-----------------------------------------------|-------------------|----------------------------------------------------------------------------------------------------------|--------------|
| ECFP_6                                        | 642810091         | 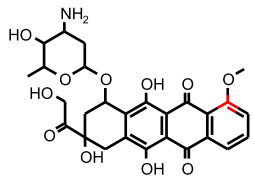<br>[*]:[c](:[*]):[*] | 0.281        |
| FCFP_6                                        | 136627117         | <br>[*]OC             | 0.17         |
| ECFP_6                                        | -1074141656       | <br>[*]=O             | 0.142        |
| <b>Top Features for negative contribution</b> |                   |                                                                                                          |              |
| <b>Fingerprint</b>                            | <b>Bit/Smiles</b> | <b>Feature Structure</b>                                                                                 | <b>Score</b> |
| ECFP_6                                        | 2106656448        | <br>[*]C(=O)[*]     | -0.352       |
| ECFP_6                                        | 683445015         | <br>[*]O[*]         | -0.266       |

|        |           |                                                                                                                               |        |
|--------|-----------|-------------------------------------------------------------------------------------------------------------------------------|--------|
| ECFP_6 | 734603939 | 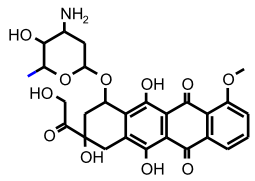 <p data-bbox="1486 313 1535 341">[*]C</p> | -0.201 |
|--------|-----------|-------------------------------------------------------------------------------------------------------------------------------|--------|

### ***In silico* ADMET analysis**

ADMET descriptors (absorption, distribution, metabolism, excretion, and toxicity) of the compounds were determined using Discovery studio 4.0. At first, the CHARMM force field was applied then the compounds were prepared and minimized according to the preparation of small molecule protocol. Then ADMET descriptors protocol was applied to carry out these studies

### **Toxicity studies**

The toxicity parameters of the synthesized compounds were calculated using Discovery studio 4.0. Doxorubicin was used as a reference drug. At first, the CHARMM force field was applied then the compounds were prepared and minimized according to the preparation of small molecule protocol. Then different parameters were calculated from toxicity prediction (extensible) protocol.



### ***In silico* ADMET analysis**

ADMET descriptors (absorption, distribution, metabolism, excretion, and toxicity) of the compounds were determined using Discovery studio 4.0. At first, the CHARMM force field was applied then the compounds were prepared and minimized according to the preparation of small molecule protocol. Then ADMET descriptors protocol was applied to carry out these studies

### **Toxicity studies**

The toxicity parameters of the synthesized compounds were calculated using Discovery studio 4.0. Doxorubicin was used as a reference drug. At first, the CHARMM force field was applied then the compounds were prepared and minimized according to the preparation of small molecule protocol. Then different parameters were calculated from toxicity prediction (extensible) protocol.

#### **4.2.1. *In vitro* anti-proliferative activity against MCF-7, HepG-2 and HCT-116**

The cells were cultured in RPMI-1640 medium supplemented with 10% fetal bovine serum (FBS), penicillin (100 unit /mL) and streptomycin sulphate (100µg/mL) at 37 °C in a 5% CO<sub>2</sub> incubator. Then, cells were dropped in 96-well plates at a density of  $3-8 \times 10^3$  cells/well and incubated for two days in a 5% CO<sub>2</sub> incubator at 37 °C. Then, the cells were treated with the synthesized compounds and the cell cultures were continued incubated for 24 h. However, Different concentrations of the compound under test (0.0, 5.0, 12.5, 25.0 and 50 mg/ml) were added to the cell monolayer. Then, (3-[4,5-dimethylthiazol-2-yl]- 2,5-diphenyltetrazolium bromide) MTT solution (20 µl, 5mg/mL) was added to each well and incubated for additional 4 h. The formed purple crystals of MTT-formazan were dissolved in 100 µl DMSO each well; the absorbance of each well was measured at 570 nm using a plate reader (EXL 800, USA). All of the compounds were tested three times. The relative cell viability in percentage was calculated. The results for IC<sub>50</sub> values of the active compounds are summarized in Table 1. The data represented the mean of three independent experiments in triplicate and were expressed as means ± SD. The IC<sub>50</sub> value was defined as the concentration at which 50% of the cells could survive.

#### **4.2.2. *DNA intercalation assay (DNA/methyl green colorimetric assay)***

Affinity of some compounds for DNA-binding was examined *in vitro* using DNA/methyl green assay using doxorubicin as a positive control. In this test, a mixture of methyl green (20 mg) and Calf thymus DNA (10 mg) (Sigma– Aldrich) were suspended in 0.05 M TrisHCl buffer (100 mL, pH 7.5) containing 7.5 mM MgSO<sub>4</sub>. This mixture was stirred continuously for 24 h at 37 °C. Then, ethanolic solution of the test compounds was pitted into the wells of a 96-well microtiter tray at a concentration of 10, 100 and 1000 µM. The excess solvent was removed from each well under vacuum, with subsequent addition of 200 µL of the DNA/methyl green solution. The test samples were incubated for 24 h in dark at ambient temperature. After that, absorbance of each sample was determined at 642.5–645 nm. In this test, the methyl green dye reversibly binds to DNA to form persistent colored complex of DNA/methyl green. This color still stables at neutral pH. When the DNA intercalators were added, the methyl green was displaced from DNA with addition of H<sub>2</sub>O molecule to the dye resulting in formation of the colorless carbinol leading to a decrease in spectrophotometric absorbance. ΔA value (the difference between DNA/methyl green complex and free cabinol) provides the simplest means for detecting the DNA-binding affinity and relative binding strength. IC<sub>50</sub>'s were determined by linear regression of data plotted on a semi-log scale and the data were compared with doxorubicin as standard DNA intercalator.

#### **4.2.3. *Measurement of topoisomerase II activity***

Compounds (8a, 8b, 9a, 9c, 9d, 12a, and 12b) were further evaluated to assess their Topo II inhibitory activities. In this test, Topo II drug screening kit (TopoGEN, Inc., Columbus) was utilized to determine the Topo II activity. Doxorubicin was used as a reference drug in this test. A typical enzyme reaction contained a mixture of human Topo II (2  $\mu$ L), substrate super coiled pHot1 DNA (0.25  $\mu$ g), 50  $\mu$ g/mL test compound (2  $\mu$ L), and assay buffer (4  $\mu$ L). The reaction started upon incubation of the mixture in 37 °C for 30 min. The reaction was terminated by addition of 10% sodium dodecylsulphate (2  $\mu$ L) and proteinase K (50  $\mu$ g/mL) at 37 °C for 15 min. followed by incubation for 15 min at 37 °C. Then, the DNA was run on 1% agarose gel in BioRad gel electrophoresis system for 1–2 h followed by staining with GelRed™ stain for 2 h and destained for 15 min with TAE buffer. The gel was imaged Via BioRad's Gel Doc™EZ system. Both supercoiled and linear strands DNA were incorporated in the gel as markers for DNA-Topo II intercalators. The results of IC<sub>50</sub> values were calculated using the GraphPad Prism version 5.0. Each reaction was performed in duplicate, and at least three independent determinations of each IC<sub>50</sub> were made.
